# Supplementary material for: Bacteriocyte Reprogramming to Cope With Nutritional Stress in a Phloem Sap Feeding Hemipteran, the Pea Aphid Acyrthosiphon pisum
Source: Front Physiol. 2018 Oct 25;9:1498. doi: 10.3389/fphys.2018.01498 (PMC6209921; doi:10.3389/fphys.2018.01498)
Supplement: Supplementary file 1 [file Table_1.XLSX]

## Sheet: Feuil1
Table S1. Sample IDs and experimental details. All samples were extracted from parthenogenetic females of pea aphids (Acyrthosiphon pisum, clone LL01). Samples highlighted in grey were excluded from data analysis after quality control tests on the microarray data.
Sample Name	Artificial Diet	Time on artificial diet	Nymphal stage	Tissue	Number of dissected aphids
Gut-AP3_D0-1	AP3	12 hours	N1	Gut	30
Gut-AP3_D0-2	AP3	12 hours	N1	Gut	30
Gut-AP3_D0-3	AP3	12 hours	N1	Gut	30
Gut-AP3_D1-1	AP3	1 day	N1	Gut	30
Gut-AP3_D1-2	AP3	1 day	N1	Gut	30
Gut-AP3_D1-3	AP3	1 day	N1	Gut	30
Gut-AP3_D2-1	AP3	2 days	N2	Gut	30
Gut-AP3_D2-2	AP3	2 days	N2	Gut	30
Gut-AP3_D2-3	AP3	2 days	N2	Gut	30
Gut-AP3_D3-1	AP3	3 days	N2	Gut	30
Gut-AP3_D3-2	AP3	3 days	N2	Gut	30
Gut-AP3_D3-3	AP3	3 days	N2	Gut	30
Gut-AP3_D4-1	AP3	4 days	N3	Gut	30
Gut-AP3_D4-2	AP3	4 days	N3	Gut	30
Gut-AP3_D4-3	AP3	4 days	N3	Gut	30
Gut-AP3_D5-1	AP3	5 days	N3	Gut	30
Gut-AP3_D5-2	AP3	5 days	N3	Gut	30
Gut-AP3_D5-3	AP3	5 days	N3	Gut	30
Gut-AP3_D7-1	AP3	7 days	N4	Gut	30
Gut-AP3_D7-2	AP3	7 days	N4	Gut	30
Gut-AP3_D7-3	AP3	7 days	N4	Gut	30
Gut-YFØ_D0-1	YFØ	12 hours	N1	Gut	30
Gut-YFØ_D0-2	YFØ	12 hours	N1	Gut	30
Gut-YFØ_D0-3	YFØ	12 hours	N1	Gut	30
Gut-YFØ_D1-1	YFØ	1 day	N1	Gut	30
Gut-YFØ_D1-2	YFØ	1 day	N1	Gut	30
Gut-YFØ_D1-3	YFØ	1 day	N1	Gut	30
Gut-YFØ_D2-1	YFØ	2 days	N2	Gut	30
Gut-YFØ_D2-2	YFØ	2 days	N2	Gut	30
Gut-YFØ_D2-3	YFØ	2 days	N2	Gut	30
Gut-YFØ_D3-1	YFØ	3 days	N2	Gut	30
Gut-YFØ_D3-2	YFØ	3 days	N2	Gut	30
Gut-YFØ_D3-3	YFØ	3 days	N2	Gut	30
Gut-YFØ_D4-1	YFØ	4 days	N3	Gut	30
Gut-YFØ_D4-2	YFØ	4 days	N3	Gut	30
Gut-YFØ_D4-3	YFØ	4 days	N3	Gut	30
Gut-YFØ_D5-1	YFØ	5 days	N3	Gut	30
Gut-YFØ_D5-2	YFØ	5 days	N3	Gut	30
Gut-YFØ_D5-3	YFØ	5 days	N3	Gut	30
Gut-YFØ_D7-1	YFØ	7 days	N4	Gut	30
Gut-YFØ_D7-2	YFØ	7 days	N4	Gut	30
Gut-YFØ_D7-3	YFØ	7 days	N4	Gut	30
Bact-AP3_D3-1	AP3	3 days	N2	Bacteriocytes	30
Bact-AP3_D3-2	AP3	3 days	N2	Bacteriocytes	30
Bact-AP3_D3-3	AP3	3 days	N2	Bacteriocytes	30
Bact-AP3_D4-1	AP3	4 days	N3	Bacteriocytes	30
Bact-AP3_D4-2	AP3	4 days	N3	Bacteriocytes	30
Bact-AP3_D4-3	AP3	4 days	N3	Bacteriocytes	30
Bact-AP3_D5-1	AP3	5 days	N3	Bacteriocytes	30
Bact-AP3_D5-2	AP3	5 days	N3	Bacteriocytes	30
Bact-AP3_D5-3	AP3	5 days	N3	Bacteriocytes	30
Bact-AP3_D7-1	AP3	7 days	N4	Bacteriocytes	30
Bact-AP3_D7-2	AP3	7 days	N4	Bacteriocytes	30
Bact-AP3_D7-3	AP3	7 days	N4	Bacteriocytes	30
Bact-YFØ_D3-1	YFØ	3 days	N2	Bacteriocytes	30
Bact-YFØ_D3-2	YFØ	3 days	N2	Bacteriocytes	30
Bact-YFØ_D3-3	YFØ	3 days	N2	Bacteriocytes	30
Bact-YFØ_D4-1	YFØ	4 days	N3	Bacteriocytes	30
Bact-YFØ_D4-2	YFØ	4 days	N3	Bacteriocytes	30
Bact-YFØ_D4-3	YFØ	4 days	N3	Bacteriocytes	30
Bact-YFØ_D5-1	YFØ	5 days	N3	Bacteriocytes	30
Bact-YFØ_D5-2	YFØ	5 days	N3	Bacteriocytes	30
Bact-YFØ_D5-3	YFØ	5 days	N3	Bacteriocytes	30
Bact-YFØ_D7-1	YFØ	7 days	N4	Bacteriocytes	30
Bact-YFØ_D7-2	YFØ	7 days	N4	Bacteriocytes	30
Bact-YFØ_D7-3	YFØ	7 days	N4	Bacteriocytes	30
