# Supplementary material for: Bacteriocyte Reprogramming to Cope With Nutritional Stress in a Phloem Sap Feeding Hemipteran, the Pea Aphid Acyrthosiphon pisum
Source: Front Physiol. 2018 Oct 25;9:1498. doi: 10.3389/fphys.2018.01498 (PMC6209921; doi:10.3389/fphys.2018.01498)
Supplement: Supplementary file 4 [file Table_4.XLSX]

## Sheet: Gut
Table S4. List of gut-enriched genes. Genes were defined as being tissue-enriched using a four-fold change threshold in the gut/bacteriocyte contrast.
ACYPI V1	log2(Fold-Change) gut > bacteriocytes	Adjusted P-value	ACYPI V2.1c	Product
ACYPI005957-RA RefSeq transcript XM_001950917 PREDICTED: Acyrthosiphon pisum similar to cathepsin B-16A (LOC100164982), partial mRNA	10.5546	3.79336e-15	ACYPI005957
ACYPI001325-RA RefSeq transcript XM_001952204 PREDICTED: Acyrthosiphon pisum similar to cysteine protease (LOC100159991), mRNA	10.0823	6.59908e-06	ACYPI001325	uncharacterized protein
ACYPI000015-RA RefSeq transcript NM_001126147 gi|187105117|ref|NM_001126147.1 Acyrthosiphon pisum cathepsin B-5880 (Catb-5880), mRNA	9.80161	0.000432321	ACYPI000015	ACYPI000015 protein
ACYPI008265-RA RefSeq transcript XM_001947626 PREDICTED: Acyrthosiphon pisum similar to thymus-specific serine protease (LOC100167468), partial mRNA	9.52109	4.92222e-20	ACYPI008265
ACYPI000014-RA RefSeq transcript NM_001126146 gi|187105115|ref|NM_001126146.1 Acyrthosiphon pisum cathepsin B-84 (Catb-84), mRNA	9.45303	1.26076e-07	ACYPI000014	Cathepsin B-S
ACYPI000010-RA RefSeq transcript NM_001126142 gi|187103107|ref|NM_001126142.1 Acyrthosiphon pisum cathepsin B-1418 (Catb-1418), mRNA	8.99912	0.000212289	ACYPI000010	Cathepsin B
ACYPI000020-RA RefSeq transcript XM_001952340 PREDICTED: Acyrthosiphon pisum cathepsin B-3483 (Catb-3483), mRNA	8.93075	2.9981e-13	ACYPI080877	Cathepsin B
ACYPI002872-RA RefSeq transcript XM_001945832 PREDICTED: Acyrthosiphon pisum similar to CG9953 CG9953-PA (LOC100161667), mRNA	8.74924	2.38195e-07	ACYPI008265
ACYPI000526-RA RefSeq transcript XM_001946335 PREDICTED: Acyrthosiphon pisum similar to membrane alanyl aminopeptidase N (LOC100159127), mRNA	8.42945	3.82739e-06	ACYPI000526
ACYPI35061-RA Glean transcript GLEAN_15061	8.38525	2.05426e-14
ACYPI004721-RA RefSeq transcript XM_001944374 PREDICTED: Acyrthosiphon pisum similar to oligopeptide transporter (LOC100163651), mRNA	8.34367	3.67444e-09	ACYPI004721
ACYPI002137-RA RefSeq transcript XM_001949187 PREDICTED: Acyrthosiphon pisum similar to beta-1,4-galactosyltransferase (LOC100160869), mRNA	8.21328	0.0037546	ACYPI002137
ACYPI000017-RA RefSeq transcript NM_001126149 gi|187107121|ref|NM_001126149.1 Acyrthosiphon pisum cathepsin B-3098 (Catb-3098), mRNA	8.20982	3.18906e-06	ACYPI000017	Cathepsin B-S
ACYPI010215-RA RefSeq transcript XM_001947504 PREDICTED: Acyrthosiphon pisum similar to n-acetylglucosaminyltransferase vi (LOC100169612), mRNA	8.18436	4.88734e-10	ACYPI010215	n-acetylglucosaminyltransferase vi
ACYPI007395-RA RefSeq transcript XM_001946227 PREDICTED: Acyrthosiphon pisum similar to kynurenine 3-monooxygenase (LOC100166533), mRNA	8.13991	4.16214e-12	ACYPI007395	Protein kintoun
ACYPI47022-RA Glean transcript GLEAN_27022	8.10317	1.89964e-20	ACYPI47022
ACYPI009609-RA RefSeq transcript XM_001946253 PREDICTED: Acyrthosiphon pisum similar to cysteine protease (LOC100168946), mRNA	7.96237	1.42479e-24	ACYPI009609
ACYPI000755-RA RefSeq transcript XM_001951160 PREDICTED: Acyrthosiphon pisum similar to sugar transporter (LOC100159380), mRNA	7.94805	0.000151169	ACYPI004518
ACYPI006235-RA RefSeq transcript XM_001946148 PREDICTED: Acyrthosiphon pisum similar to sulfate transporter (LOC100165278), mRNA	7.81327	2.07025e-15	ACYPI006235	Sulfate transporter
ACYPI007505-RA RefSeq transcript XM_001952026 PREDICTED: Acyrthosiphon pisum similar to putative troponin C (LOC100166650), mRNA	7.80133	1.04575e-15	ACYPI007505	Troponin C
ACYPI40849-RA Glean transcript GLEAN_20849	7.7445	2.06093e-15
ACYPI005879-RA RefSeq transcript XM_001945438 PREDICTED: Acyrthosiphon pisum similar to juvenile hormone-inducible protein 26 (LOC100164898), mRNA	7.73768	6.37317e-18	ACYPI005879	RH23112p
ACYPI001944-RA RefSeq transcript XM_001950545 PREDICTED: Acyrthosiphon pisum similar to GA18461-PA (LOC100160663), mRNA	7.73292	3.94481e-12	ACYPI001944	LP01562p
ACYPI000619-RA RefSeq transcript XM_001948408 PREDICTED: Acyrthosiphon pisum similar to cytochrome P450 CYP6AX1 protein (LOC100159226), mRNA	7.7246	1.44045e-07	ACYPI000619	Cytochrome P450
ACYPI008964-RA RefSeq transcript XM_001947449 PREDICTED: Acyrthosiphon pisum similar to CG14935 CG14935-PB (LOC100168244), mRNA	7.71726	5.02763e-15	ACYPI008964
ACYPI002492-RA RefSeq transcript XM_001949468 PREDICTED: Acyrthosiphon pisum similar to arylalkylamine N-acetyltransferase (LOC100161257), mRNA	7.71278	1.73486e-06	ACYPI002492
ACYPI003597-RA RefSeq transcript XM_001946599 PREDICTED: Acyrthosiphon pisum similar to LOC495211 protein (LOC100162445), mRNA	7.70457	6.07626e-05	ACYPI003597	uncharacterized protein
ACYPI008283-RA RefSeq transcript XM_001948054 PREDICTED: Acyrthosiphon pisum similar to Sug CG7334-PA (LOC100167487), mRNA	7.70184	8.14345e-17	ACYPI008283	sug
ACYPI006005-RA RefSeq transcript XM_001942958 PREDICTED: Acyrthosiphon pisum hypothetical protein LOC100165032 (LOC100165032), mRNA	7.65265	2.50413e-12	ACYPI006005	uncharacterized protein
ACYPI007753-RA RefSeq transcript XM_001950021 PREDICTED: Acyrthosiphon pisum similar to alpha-amylase (LOC100166916), mRNA	7.64742	2.14327e-08	ACYPI007753
ACYPI001128-RA RefSeq transcript XM_001943138 PREDICTED: Acyrthosiphon pisum similar to cathepsin B-N (LOC100159781), mRNA	7.59857	4.32818e-16	ACYPI001128	Cathepsin B-S
ACYPI000986-RA RefSeq transcript XM_001949497 PREDICTED: Acyrthosiphon pisum similar to GA21838-PA (LOC100159632), mRNA	7.59581	5.62746e-12	ACYPI000986
ACYPI001281-RA RefSeq transcript XM_001943617 PREDICTED: Acyrthosiphon pisum similar to cathepsin B (LOC100159943), mRNA	7.56138	3.10067e-10	ACYPI001281	Cathepsin B
ACYPI005549-RA RefSeq transcript XM_001952639 PREDICTED: Acyrthosiphon pisum similar to alpha-glucosidase (LOC100164540), mRNA	7.55433	1.61089e-13	ACYPI005549	AGAP003995-PA
ACYPI004518-RA RefSeq transcript XM_001947117 PREDICTED: Acyrthosiphon pisum similar to sugar transporter (LOC100163429), mRNA	7.54236	8.96583e-08	ACYPI082810
ACYPI007325-RA RefSeq transcript XM_001944635 PREDICTED: Acyrthosiphon pisum hypothetical protein LOC100166456 (LOC100166456), mRNA	7.53265	2.6662e-15	ACYPI068649	uncharacterized protein
ACYPI34376-RA Glean transcript GLEAN_14376	7.53213	6.72567e-20	ACYPI34376	uncharacterized protein
ACYPI006533-RA RefSeq transcript XM_001943770 PREDICTED: Acyrthosiphon pisum similar to T28H10.3 (LOC100165598), mRNA	7.51998	1.10567e-11	ACYPI006533
ACYPI006014-RA RefSeq transcript XM_001944996 PREDICTED: Acyrthosiphon pisum similar to sugar transporter (LOC100165042), mRNA	7.51575	8.21864e-12	ACYPI006014	Sugar transporter
ACYPI002161-RA RefSeq transcript XM_001947885 PREDICTED: Acyrthosiphon pisum similar to cytochrome P450 CYP6AX1 protein (LOC100160895), mRNA	7.47684	7.87379e-11	ACYPI002161	Cytochrome P450
ACYPI54799-RA Glean transcript GLEAN_34799	7.4765	1.88273e-25	ACYPI54799
ACYPI001001-RA RefSeq transcript XM_001948385 PREDICTED: Acyrthosiphon pisum similar to paramyosin, long form (LOC100159647), mRNA	7.44024	7.22789e-10	ACYPI001001
ACYPI000510-RA RefSeq transcript XM_001952339 PREDICTED: Acyrthosiphon pisum similar to conserved hypothetical protein (LOC100159109), mRNA	7.36718	2.72965e-10	ACYPI000510	uncharacterized protein
ACYPI008179-RA RefSeq transcript XM_001946013 PREDICTED: Acyrthosiphon pisum similar to solute carrier family 23 member 2 (LOC100167380), mRNA	7.35808	3.54412e-11	ACYPI008179	Solute carrier family 23 member 1
ACYPI008178-RA RefSeq transcript XM_001952057 PREDICTED: Acyrthosiphon pisum similar to muscle myosin heavy chain, transcript variant 1 (LOC100167379), mRNA	7.3299	2.24373e-23
ACYPI004295-RA RefSeq transcript XM_001952415 PREDICTED: Acyrthosiphon pisum similar to cytochrome P450 CYP6AX1 protein (LOC100163195), mRNA	7.32184	1.31273e-07	ACYPI004295
ACYPI46731-RA Glean transcript GLEAN_26731	7.3064	4.67178e-19	ACYPI007758	Kelch-like protein 20
ACYPI009835-RA RefSeq transcript XM_001949539 PREDICTED: Acyrthosiphon pisum similar to AGAP008896-PA (LOC100169195), mRNA	7.30303	8.61498e-21	ACYPI009835	drp1
ACYPI000018-RA RefSeq transcript XM_001943067 PREDICTED: Acyrthosiphon pisum cathepsin B-16D2 (Catb-16d2), mRNA	7.29712	3.61654e-05	ACYPI000018	Cathepsin B-S
ACYPI26024-RA Glean transcript GLEAN_06024	7.25158	8.16337e-19	ACYPI26024	juvenile hormone-inducible protein
ACYPI003935-RA RefSeq transcript XM_001943598 PREDICTED: Acyrthosiphon pisum similar to AGAP001236-PA (LOC100162810), mRNA	7.23802	1.06733e-14	ACYPI003935	Sugar transporter 7
ACYPI007430-RA RefSeq transcript XM_001950666 PREDICTED: Acyrthosiphon pisum similar to aspartyl-tRNA synthetase (LOC100166571), partial mRNA	7.21701	1.13357e-12	ACYPI007430
ACYPI004243-RA RefSeq transcript XM_001943847 PREDICTED: Acyrthosiphon pisum similar to glutamic-oxaloacetic transaminase 1, soluble (aspartate aminotransferase 1) (LOC100163139), mRNA	7.20375	4.17692e-16	ACYPI004243
ACYPI007418-RA RefSeq transcript XM_001952643 PREDICTED: Acyrthosiphon pisum similar to AGAP010973-PA (LOC100166559), mRNA	7.19997	2.60262e-11	ACYPI007418
ACYPI002746-RA RefSeq transcript XM_001949668 PREDICTED: Acyrthosiphon pisum hypothetical protein LOC100161530 (LOC100161530), mRNA	7.18644	2.00765e-07	ACYPI002746	uncharacterized protein
ACYPI008526-RA RefSeq transcript XM_001948499 PREDICTED: Acyrthosiphon pisum hypothetical protein LOC100167760 (LOC100167760), partial mRNA	7.15212	3.66659e-11	ACYPI28448
ACYPI42239-RA Glean transcript GLEAN_22239	7.11386	2.42573e-24	ACYPI42239
ACYPI001719-RA RefSeq transcript XM_001950339 PREDICTED: Acyrthosiphon pisum hypothetical protein LOC100160421 (LOC100160421), mRNA	7.11374	3.98342e-10	ACYPI001719
ACYPI006848-RA RefSeq transcript XM_001947571 PREDICTED: Acyrthosiphon pisum similar to gamma-glutamyltranspeptidase 1 (LOC100165936), mRNA	7.11197	2.29408e-17	ACYPI006848	gamma-glutamyltranspeptidase 1 precursor
ACYPI008595-RA RefSeq transcript XM_001943021 PREDICTED: Acyrthosiphon pisum similar to ATP-binding cassette, sub-family C (CFTR/MRP), member 4 (LOC100167838), mRNA	7.11046	2.54181e-18	ACYPI008595	Multidrug resistance protein 4
ACYPI003190-RA RefSeq transcript XM_001952557 PREDICTED: Acyrthosiphon pisum similar to GA19694-PA (LOC100162007), partial mRNA	7.0689	3.27378e-08	ACYPI007792	mgc165775 protein
ACYPI44594-RA Glean transcript GLEAN_24594	7.06625	4.83747e-24
ACYPI006529-RA RefSeq transcript XM_001949987 PREDICTED: Acyrthosiphon pisum similar to AGAP012154-PA (LOC100165594), partial mRNA	7.04451	8.86759e-10	ACYPI006529	BcDNA.GH06717
ACYPI000019-RA RefSeq transcript XM_001952290 PREDICTED: Acyrthosiphon pisum cathepsin B-1874 (Catb-1874), mRNA	7.03949	6.47142e-13
ACYPI002599-RA RefSeq transcript XM_001950669 PREDICTED: Acyrthosiphon pisum similar to Sarcoplasmic calcium-binding protein 2 CG14904-PA (LOC100161375), partial mRNA	7.0394	1.41293e-17	ACYPI002599
ACYPI25244-RA Glean transcript GLEAN_05244	7.03414	2.82992e-16	ACYPI25244	hypothetical protein
ACYPI008803-RA RefSeq transcript XM_001949098 PREDICTED: Acyrthosiphon pisum similar to zinc finger protein, putative (LOC100168067), partial mRNA	7.03252	5.86575e-19	ACYPI008803
ACYPI004819-RA RefSeq transcript XM_001949476 PREDICTED: Acyrthosiphon pisum similar to prolylcarboxypeptidase (LOC100163759), mRNA	7.0189	1.88192e-07	ACYPI004819
ACYPI003684-RA RefSeq transcript XM_001949766 PREDICTED: Acyrthosiphon pisum similar to LOC402804 protein (LOC100162536), mRNA	6.98884	1.82752e-11	ACYPI003684	bphl protein
ACYPI006387-RB RefSeq transcript XM_001951985 PREDICTED: Acyrthosiphon pisum similar to aquaporin, transcript variant 2 (LOC100165436), mRNA	6.94523	1.25546e-16
ACYPI48682-RA Glean transcript GLEAN_28682	6.91366	8.56661e-23
ACYPI001427-RA RefSeq transcript XM_001945262 PREDICTED: Acyrthosiphon pisum similar to juvenile hormone-inducible protein 26 (LOC100160101), mRNA	6.88282	1.50161e-05	ACYPI001427	juvenile hormone-inducible protein
ACYPI26199-RA Glean transcript GLEAN_06199	6.874	7.19687e-21	ACYPI26199	Kelch-like protein 3
ACYPI006081-RA RefSeq transcript XM_001946547 PREDICTED: Acyrthosiphon pisum hypothetical protein LOC100165115 (LOC100165115), mRNA	6.87132	6.72007e-15	ACYPI006081	uncharacterized protein
ACYPI001606-RA RefSeq transcript XM_001944363 PREDICTED: Acyrthosiphon pisum hypothetical protein LOC100160301 (LOC100160301), mRNA	6.87003	1.29773e-08	ACYPI001606	uncharacterized protein
ACYPI26998-RA Glean transcript GLEAN_06998	6.86614	2.41876e-22	ACYPI26998
ACYPI29519-RA Glean transcript GLEAN_09519	6.85935	2.71326e-25	ACYPI29519
ACYPI008876-RA RefSeq transcript XM_001947399 PREDICTED: Acyrthosiphon pisum similar to multidrug resistance protein (LOC100168150), mRNA	6.82965	2.25448e-20	ACYPI008876
ACYPI38757-RA Glean transcript GLEAN_18757	6.82732	7.92899e-22
ACYPI000332-RA RefSeq transcript XM_001942542 PREDICTED: Acyrthosiphon pisum similar to ring canal kelch protein (LOC100158915), mRNA	6.82678	1.70053e-08	ACYPI000332
ACYPI007419-RA RefSeq transcript XM_001944893 PREDICTED: Acyrthosiphon pisum similar to Luciferase (LOC100166560), mRNA	6.80862	9.79514e-07	ACYPI007419	4-coumarate-coa ligase
ACYPI005885-RA RefSeq transcript XM_001947405 PREDICTED: Acyrthosiphon pisum similar to troponin I (LOC100164905), mRNA	6.79464	1.67216e-11	ACYPI005885
ACYPI006346-RA RefSeq transcript XM_001951823 PREDICTED: Acyrthosiphon pisum hypothetical protein LOC100165393 (LOC100165393), mRNA	6.78645	3.9375e-09	ACYPI006346
ACYPI000520-RA RefSeq transcript XM_001949416 PREDICTED: Acyrthosiphon pisum similar to ZK899.2 (LOC100159121), mRNA	6.78204	5.19374e-11	ACYPI000520
ACYPI003917-RA RefSeq transcript XM_001948421 PREDICTED: Acyrthosiphon pisum similar to CG16995 CG16995-PA (LOC100162791), mRNA	6.77823	0.00044253	ACYPI003917	CG16995
ACYPI000375-RA RefSeq transcript XM_001950660 PREDICTED: Acyrthosiphon pisum similar to AGAP009769-PA (LOC100158958), mRNA	6.76699	4.73285e-10	ACYPI000375
ACYPI010034-RA RefSeq transcript XM_001950336 PREDICTED: Acyrthosiphon pisum similar to ryanodine receptor-like protein (LOC100169413), mRNA	6.75682	1.2165e-18	ACYPI010034	uncharacterized protein
ACYPI006655-RA RefSeq transcript XM_001948315 PREDICTED: Acyrthosiphon pisum similar to membrane alanyl aminopeptidase N (LOC100165726), mRNA	6.70802	2.78786e-13	ACYPI006655	Aminopeptidase N-like protein
ACYPI001559-RA RefSeq transcript XM_001944811 PREDICTED: Acyrthosiphon pisum hypothetical protein LOC100160247 (LOC100160247), mRNA	6.69725	1.47523e-08	ACYPI001559
ACYPI45019-RA Glean transcript GLEAN_25019	6.65315	3.72415e-29	ACYPI45019
ACYPI000969-RA RefSeq transcript XM_001947785 PREDICTED: Acyrthosiphon pisum similar to tropomyosin 1 (LOC100159612), mRNA	6.63304	5.79043e-12	ACYPI000969
ACYPI30083-RA Glean transcript GLEAN_10083	6.63092	1.89715e-21	ACYPI30083
ACYPI28448-RA Glean transcript GLEAN_08448	6.62316	3.31889e-15	ACYPI28448
ACYPI008736-RA RefSeq transcript XM_001942656 PREDICTED: Acyrthosiphon pisum similar to Unc-89 CG33519-PB (LOC100167996), mRNA	6.62219	2.31145e-05	ACYPI008736	Kinin-like peptide-S
ACYPI008224-RA RefSeq transcript XM_001951836 PREDICTED: Acyrthosiphon pisum hypothetical protein LOC100167427 (LOC100167427), mRNA	6.59754	2.39348e-11	ACYPI008224	uncharacterized protein
ACYPI001772-RA RefSeq transcript XM_001945954 PREDICTED: Acyrthosiphon pisum similar to alpha-amylase (LOC100160477), partial mRNA	6.58472	1.5008e-08	ACYPI001772
ACYPI56071-RA Glean transcript GLEAN_36071	6.56263	4.53114e-32	ACYPI56071
ACYPI004407-RA RefSeq transcript XM_001952692 PREDICTED: Acyrthosiphon pisum similar to cytochrome P450 (LOC100163313), mRNA	6.56243	5.87397e-17	ACYPI004407	Cytochrome P450
ACYPI002306-RA RefSeq transcript XM_001949110 PREDICTED: Acyrthosiphon pisum similar to lethal (2) 01289 CG9432-PB (LOC100161052), mRNA	6.54629	1.39087e-09	ACYPI002306
ACYPI009848-RA RefSeq transcript XM_001946312 PREDICTED: Acyrthosiphon pisum similar to delta(9)-desaturase (LOC100169208), mRNA	6.53521	3.61098e-17	ACYPI009848
ACYPI003827-RA RefSeq transcript XM_001951199 PREDICTED: Acyrthosiphon pisum similar to glucosyl/glucuronosyl transferases (LOC100162688), mRNA	6.51016	3.77934e-08	ACYPI003827	Glucosyl/glucuronosyl transferases
ACYPI003477-RA RefSeq transcript XM_001943774 PREDICTED: Acyrthosiphon pisum similar to Multiple inositol polyphosphate phosphatase 1 CG4123-PA (LOC100162318), mRNA	6.49164	4.06535e-14	ACYPI003477
ACYPI52702-RA Glean transcript GLEAN_32702	6.47414	9.58794e-27	ACYPI52702
ACYPI000021-RA RefSeq transcript XM_001952283 PREDICTED: Acyrthosiphon pisum cathepsin B-10270 (Catb-10270), mRNA	6.46862	4.34568e-12	ACYPI000021	Cathepsin B
ACYPI002172-RA RefSeq transcript XM_001942734 PREDICTED: Acyrthosiphon pisum hypothetical protein LOC100160906 (LOC100160906), mRNA	6.4423	6.55079e-12
ACYPI56467-RA Glean transcript GLEAN_36467	6.4404	1.69382e-31
ACYPI007963-RA RefSeq transcript XM_001946487 PREDICTED: Acyrthosiphon pisum hypothetical protein LOC100167147 (LOC100167147), mRNA	6.43572	8.01251e-05	ACYPI007963	uncharacterized protein
ACYPI004302-RA RefSeq transcript XM_001952608 PREDICTED: Acyrthosiphon pisum similar to AGAP007483-PA (LOC100163202), mRNA	6.40385	2.72896e-11	ACYPI004302
ACYPI26026-RA Glean transcript GLEAN_06026	6.38508	4.83209e-17	ACYPI26026
ACYPI29810-RA Glean transcript GLEAN_09810	6.35734	9.02989e-23	ACYPI29810
ACYPI010083-RA RefSeq transcript XM_001946302 PREDICTED: Acyrthosiphon pisum similar to myokinin receptor (LOC100169468), mRNA	6.35144	5.44945e-13	ACYPI010083	Neuropeptide receptor A23
ACYPI53276-RA Glean transcript GLEAN_33276	6.35142	3.47881e-33	ACYPI53276
ACYPI005400-RA RefSeq transcript XM_001945073 PREDICTED: Acyrthosiphon pisum similar to conserved hypothetical protein (LOC100164378), mRNA	6.3407	1.52456e-06
ACYPI007654-RA RefSeq transcript XM_001948561 PREDICTED: Acyrthosiphon pisum similar to AGAP008359-PA (LOC100166814), partial mRNA	6.34019	8.27094e-11	ACYPI008303	Sodium-coupled monocarboxylate transporter 1
ACYPI008688-RA RefSeq transcript XM_001950481 PREDICTED: Acyrthosiphon pisum hypothetical protein LOC100167942 (LOC100167942), mRNA	6.31506	1.73618e-22	ACYPI008688	uncharacterized protein
ACYPI000168-RA RefSeq transcript XM_001944400 PREDICTED: Acyrthosiphon pisum similar to CG7860 CG7860-PA (LOC100158730), mRNA	6.31067	2.15701e-08	ACYPI000168	n4-beta-n-acetylglucosaminyl-l-asparaginase
ACYPI55161-RA Glean transcript GLEAN_35161	6.30993	1.16278e-22
ACYPI005477-RA RefSeq transcript XM_001943115 PREDICTED: Acyrthosiphon pisum similar to cytochrome p450 (LOC100164459), mRNA	6.29995	2.4235e-16	ACYPI005477	Cytochrome P450
ACYPI001504-RA RefSeq transcript XM_001951448 PREDICTED: Acyrthosiphon pisum similar to F57G4.9 (LOC100160189), mRNA	6.28351	3.68135e-05	ACYPI001504
ACYPI002659-RA RefSeq transcript XM_001943547 PREDICTED: Acyrthosiphon pisum similar to sucrase (LOC100161439), mRNA	6.27107	9.05313e-16	ACYPI002659	Maltase 1
ACYPI001214-RA RefSeq transcript XM_001943971 PREDICTED: Acyrthosiphon pisum hypothetical protein LOC100159873 (LOC100159873), partial mRNA	6.26425	1.4934e-10	ACYPI001728
ACYPI006372-RA RefSeq transcript XM_001947582 PREDICTED: Acyrthosiphon pisum similar to serine 3-dehydrogenase (LOC100165420), partial mRNA	6.26051	3.37897e-12	ACYPI006372	antdh-PA
ACYPI56076-RA Glean transcript GLEAN_36076	6.22303	1.72514e-32	ACYPI56076	uncharacterized protein
ACYPI002709-RA RefSeq transcript XM_001944190 PREDICTED: Acyrthosiphon pisum similar to CG15661 CG15661-PB (LOC100161491), partial mRNA	6.22248	1.74437e-13	ACYPI008565	Glucosyl/glucuronosyl transferases
ACYPI24120-RA Glean transcript GLEAN_04120	6.19975	1.66945e-18	ACYPI24120
ACYPI000825-RA RefSeq transcript XM_001949253 PREDICTED: Acyrthosiphon pisum similar to leucine-rich transmembrane protein (LOC100159455), partial mRNA	6.19871	0.00245987	ACYPI000825	Leucine-rich repeat neuronal protein 1
ACYPI009261-RA RefSeq transcript XM_001947400 PREDICTED: Acyrthosiphon pisum similar to sulfate transporter (LOC100168572), partial mRNA	6.1971	1.14087e-19
ACYPI002892-RA RefSeq transcript XM_001951920 PREDICTED: Acyrthosiphon pisum similar to adenine nucleotide translocator (LOC100161691), mRNA	6.1906	7.10017e-07	ACYPI002892	ADP/ATP translocase 4
ACYPI006680-RA RefSeq transcript XM_001950528 PREDICTED: Acyrthosiphon pisum similar to muscle LIM protein (LOC100165751), mRNA	6.18893	1.11921e-22	ACYPI006680	Muscle LIM protein Mlp84B
ACYPI001271-RA RefSeq transcript XM_001946241 PREDICTED: Acyrthosiphon pisum hypothetical protein LOC100159932, transcript variant 1 (LOC100159932), mRNA	6.16138	2.16589e-15	ACYPI001271	uncharacterized protein
ACYPI003837-RA RefSeq transcript XM_001950515 PREDICTED: Acyrthosiphon pisum similar to apyrase, putative (LOC100162698), mRNA	6.15792	5.79043e-12	ACYPI003837	5' nucleotidase
ACYPI004751-RA RefSeq transcript XM_001949642 PREDICTED: Acyrthosiphon pisum similar to sulfate transporter (LOC100163684), partial mRNA	6.15768	5.31287e-21	ACYPI004751
ACYPI000710-RA RefSeq transcript XM_001948594 PREDICTED: Acyrthosiphon pisum similar to CG3706 CG3706-PA (LOC100159327), mRNA	6.14048	1.29539e-10	ACYPI000710	hypothetical protein
ACYPI002751-RA RefSeq transcript XM_001943246 PREDICTED: Acyrthosiphon pisum similar to leucine-rich transmembrane protein (LOC100161535), mRNA	6.13295	1.80173e-12	ACYPI002751	leucine-rich transmembrane protein
ACYPI001407-RA RefSeq transcript XM_001942871 PREDICTED: Acyrthosiphon pisum similar to tubulointerstitial nephritis antigen (LOC100160079), mRNA	6.12773	7.93849e-06	ACYPI001407
ACYPI000144-RA RefSeq transcript XM_001948957 PREDICTED: Acyrthosiphon pisum similar to putative kelch-like protein 1 (LOC100158704), mRNA	6.1089	2.09212e-11	ACYPI000144	ring canal kelch protein
ACYPI005110-RA RefSeq transcript XM_001945662 PREDICTED: Acyrthosiphon pisum similar to CG1105 CG1105-PA (LOC100164069), mRNA	6.10033	8.27311e-12	ACYPI005110	uncharacterized protein
ACYPI38102-RA Glean transcript GLEAN_18102	6.09507	3.54264e-25
ACYPI006558-RA RefSeq transcript XM_001950364 PREDICTED: Acyrthosiphon pisum similar to alpha-amylase (LOC100165623), partial mRNA	6.09326	7.0609e-12	ACYPI006558
ACYPI006232-RA RefSeq transcript XM_001952605 PREDICTED: Acyrthosiphon pisum similar to AGAP007483-PA (LOC100165275), mRNA	6.06536	1.09037e-11	ACYPI006232	Sugar transporter 14
ACYPI43512-RA Glean transcript GLEAN_23512	6.0652	1.11878e-30	ACYPI43512
ACYPI006397-RA RefSeq transcript XM_001944466 PREDICTED: Acyrthosiphon pisum similar to conserved hypothetical protein (LOC100165446), mRNA	6.04632	0.000101021	ACYPI006397
ACYPI006873-RA RefSeq transcript XM_001951315 PREDICTED: Acyrthosiphon pisum similar to IP16036p (LOC100165963), mRNA	6.04235	2.78211e-20	ACYPI006873	PDZ and LIM domain protein 2
ACYPI000692-RA RefSeq transcript XM_001944690 PREDICTED: Acyrthosiphon pisum similar to CG6416 CG6416-PA (LOC100159308), partial mRNA	6.04059	2.39769e-05	ACYPI006873	PDZ and LIM domain protein 2
ACYPI003046-RA RefSeq transcript XM_001949275 PREDICTED: Acyrthosiphon pisum similar to CG9702 CG9702-PA (LOC100161854), mRNA	6.03684	0.000361276	ACYPI003046
ACYPI31715-RA Glean transcript GLEAN_11715	6.03419	6.8235e-21	ACYPI31715	sugar transporter
ACYPI000009-RA RefSeq transcript NM_001126141 gi|187099105|ref|NM_001126141.1 Acyrthosiphon pisum cathepsin B (Catb-2744), mRNA	6.0265	8.58047e-07	ACYPI000009	Cathepsin B
ACYPI49903-RA Glean transcript GLEAN_29903	6.02087	6.15033e-26	ACYPI065991	BcDNA.GH06717
ACYPI005394-RA RefSeq transcript XM_001951522 PREDICTED: Acyrthosiphon pisum similar to muscle protein 20-like protein (LOC100164372), mRNA	6.00321	5.25623e-09	ACYPI005394	Muscle-specific protein 20
ACYPI007508-RA RefSeq transcript XM_001951804 PREDICTED: Acyrthosiphon pisum similar to AGAP005507-PB (LOC100166654), mRNA	5.98565	4.42524e-12
ACYPI000817-RA RefSeq transcript XM_001944039 PREDICTED: Acyrthosiphon pisum similar to peroxinectin (LOC100159447), mRNA	5.98201	6.42794e-07	ACYPI000817
ACYPI009519-RA RefSeq transcript XM_001946504 PREDICTED: Acyrthosiphon pisum similar to glutathione S-transferase-like protein, transcript variant 1 (LOC100168850), mRNA	5.97934	3.22763e-18	ACYPI009519	Glutathione S-transferase
ACYPI26020-RA Glean transcript GLEAN_06020	5.9606	9.05313e-16	ACYPI26020
ACYPI55147-RA Glean transcript GLEAN_35147	5.9474	9.7888e-28	ACYPI55147	uncharacterized protein
ACYPI002440-RA RefSeq transcript XM_001948653 PREDICTED: Acyrthosiphon pisum similar to gamma-glutamyl hydrolase, putative (LOC100161199), mRNA	5.94621	4.82295e-11	ACYPI002440	Gamma-glutamyl hydrolase
ACYPI003561-RB RefSeq transcript XM_001949714 PREDICTED: Acyrthosiphon pisum hypothetical protein LOC100162409, transcript variant 2 (LOC100162409), mRNA	5.94182	8.05798e-06	ACYPI003561
ACYPI008936-RA RefSeq transcript XM_001947490 PREDICTED: Acyrthosiphon pisum similar to Ring canal kelch protein (LOC100168213), mRNA	5.929	1.305e-20	ACYPI008936	Kelch-like protein 3
ACYPI008521-RA RefSeq transcript XM_001944945 PREDICTED: Acyrthosiphon pisum similar to tripartite motif protein trim2,3 (LOC100167755), partial mRNA	5.92764	1.19537e-19	ACYPI008521
ACYPI001265-RA RefSeq transcript XM_001949679 PREDICTED: Acyrthosiphon pisum similar to Sug CG7334-PA (LOC100159926), mRNA	5.91379	8.25266e-15	ACYPI001265	sug
ACYPI003523-RA RefSeq transcript XM_001944846 PREDICTED: Acyrthosiphon pisum similar to GA18954-PA (LOC100162367), mRNA	5.90987	5.08595e-12	ACYPI003523	cationic amino acid transporter
ACYPI35353-RA Glean transcript GLEAN_15353	5.89544	3.36715e-22	ACYPI35353
ACYPI004249-RA RefSeq transcript XM_001952276 PREDICTED: Acyrthosiphon pisum similar to AGAP000550-PA (LOC100163145), mRNA	5.89283	8.14345e-17	ACYPI004249
ACYPI008767-RA RefSeq transcript XM_001946491 PREDICTED: Acyrthosiphon pisum hypothetical protein LOC100168031 (LOC100168031), mRNA	5.88114	1.13848e-15	ACYPI008767
ACYPI50714-RA Glean transcript GLEAN_30714	5.86836	1.23616e-28
ACYPI008051-RA RefSeq transcript XM_001946585 PREDICTED: Acyrthosiphon pisum similar to oligopeptide transporter (LOC100167240), mRNA	5.86448	8.71482e-16	ACYPI008051
ACYPI31722-RA Glean transcript GLEAN_11722	5.85641	1.85088e-26
ACYPI004765-RA RefSeq transcript XM_001949888 PREDICTED: Acyrthosiphon pisum similar to ATP-dependent bile acid permease (LOC100163701), partial mRNA	5.85604	3.15699e-10
ACYPI20144-RA Glean transcript GLEAN_00144	5.84996	5.87613e-14	ACYPI20144
ACYPI26623-RA Glean transcript GLEAN_06623	5.82595	1.22543e-20	ACYPI26623
ACYPI005645-RA RefSeq transcript XM_001950825 PREDICTED: Acyrthosiphon pisum similar to alpha-amylase (LOC100164652), partial mRNA	5.81593	4.10089e-11
ACYPI26939-RA Glean transcript GLEAN_06939	5.80728	7.28572e-19	ACYPI26935
ACYPI009181-RA RefSeq transcript XM_001951653 PREDICTED: Acyrthosiphon pisum similar to glucose transporter (sugar transporter (LOC100168486), mRNA	5.79327	2.03739e-16	ACYPI009181	glucose transporter
ACYPI21607-RA Glean transcript GLEAN_01607	5.79092	1.76049e-19	ACYPI003811	Synaptic vesicle glycoprotein 2B
ACYPI48302-RA Glean transcript GLEAN_28302	5.78802	2.17829e-17
ACYPI002609-RA RefSeq transcript XM_001943800 PREDICTED: Acyrthosiphon pisum similar to Zeelin1 CG6803-PD, transcript variant 1 (LOC100161385), mRNA	5.77093	2.58932e-09
ACYPI007122-RA RefSeq transcript XM_001949569 PREDICTED: Acyrthosiphon pisum similar to alpha-amylase (LOC100166235), mRNA	5.76979	8.10248e-10	ACYPI007122
ACYPI002518-RA RefSeq transcript XM_001948559 PREDICTED: Acyrthosiphon pisum similar to AGAP002079-PA (LOC100161284), mRNA	5.76011	1.99617e-10	ACYPI002518
ACYPI004957-RA RefSeq transcript XM_001945920 PREDICTED: Acyrthosiphon pisum similar to conserved hypothetical protein (LOC100163906), mRNA	5.74866	1.56152e-06	ACYPI004957	uncharacterized protein
ACYPI41923-RA Glean transcript GLEAN_21923	5.74648	1.78734e-21	ACYPI41923
ACYPI003561-RA RefSeq transcript XM_001949689 PREDICTED: Acyrthosiphon pisum hypothetical protein LOC100162409, transcript variant 1 (LOC100162409), mRNA	5.74039	3.09832e-11	ACYPI003561
ACYPI002020-RA RefSeq transcript XM_001948250 PREDICTED: Acyrthosiphon pisum similar to sucrase (LOC100160748), mRNA	5.72261	1.16288e-15	ACYPI002020
ACYPI007406-RA RefSeq transcript XM_001951370 PREDICTED: Acyrthosiphon pisum hypothetical protein LOC100166545 (LOC100166545), mRNA	5.69765	5.80651e-19	ACYPI007406
ACYPI004099-RA RefSeq transcript XM_001945603 PREDICTED: Acyrthosiphon pisum similar to alpha-glucosidase isozyme I (LOC100162981), partial mRNA	5.68556	3.09675e-13
ACYPI000002-RA RefSeq transcript NM_001126135 gi|187097093|ref|NM_001126135.1 Acyrthosiphon pisum sucrase (S1), mRNA	5.68498	3.31441e-10	ACYPI000002
ACYPI27581-RA Glean transcript GLEAN_07581	5.68113	1.25916e-17	ACYPI27581	sugar transporter
ACYPI003526-RA RefSeq transcript XM_001950281 PREDICTED: Acyrthosiphon pisum hypothetical protein LOC100162370 (LOC100162370), mRNA	5.66392	1.41468e-08	ACYPI003526
ACYPI26465-RA Glean transcript GLEAN_06465	5.63192	9.07746e-26	ACYPI26465
ACYPI009754-RA RefSeq transcript XM_001949474 PREDICTED: Acyrthosiphon pisum similar to alpha-amylase (LOC100169105), mRNA	5.62931	6.83134e-24
ACYPI004952-RA RefSeq transcript XM_001945798 PREDICTED: Acyrthosiphon pisum similar to cytochrome P450 (LOC100163900), mRNA	5.62463	5.10607e-14	ACYPI004952
ACYPI005254-RA RefSeq transcript XM_001945166 PREDICTED: Acyrthosiphon pisum similar to Juvenile hormone-inducible protein, putative (LOC100164219), mRNA	5.62404	2.93568e-11	ACYPI005254	juvenile hormone-inducible protein
ACYPI007878-RA RefSeq transcript XM_001951237 PREDICTED: Acyrthosiphon pisum similar to Mitochondrial phosphate carrier protein CG4994-PA (LOC100167055), mRNA	5.6226	6.2858e-09	ACYPI007878
ACYPI006651-RA RefSeq transcript XM_001951751 PREDICTED: Acyrthosiphon pisum similar to membrane-associated LPS-inducible TNF alpha factor protein-like protein, transcript variant 1 (LOC100165722), mRNA	5.61764	4.21935e-12	ACYPI006651
ACYPI24525-RA Glean transcript GLEAN_04525	5.58431	4.22885e-20	ACYPI003980	calcium/calmodulin-dependent nucleotide phosphodiesterase
ACYPI003338-RA RefSeq transcript XM_001943906 PREDICTED: Acyrthosiphon pisum similar to Legumain precursor (Asparaginyl endopeptidase) (Protease, cysteine 1) (LOC100162169), mRNA	5.58331	5.80834e-17	ACYPI003338	uncharacterized protein
ACYPI001271-RB RefSeq transcript XM_001946287 PREDICTED: Acyrthosiphon pisum hypothetical protein LOC100159932, transcript variant 2 (LOC100159932), mRNA	5.5788	1.85759e-06	ACYPI001271	uncharacterized protein
ACYPI47337-RA Glean transcript GLEAN_27337	5.57176	9.5775e-24
ACYPI55336-RA Glean transcript GLEAN_35336	5.55933	6.08995e-27	ACYPI55336
ACYPI25540-RA Glean transcript GLEAN_05540	5.55647	1.53449e-16	ACYPI25540	AGAP010048-PA
ACYPI001640-RA RefSeq transcript XM_001944897 PREDICTED: Acyrthosiphon pisum similar to slimfast CG11128-PC (LOC100160337), mRNA	5.55454	2.29644e-12
ACYPI26741-RA Glean transcript GLEAN_06741	5.52861	5.61524e-19	ACYPI26741
ACYPI008212-RA RefSeq transcript XM_001946696 PREDICTED: Acyrthosiphon pisum similar to tigger transposable element derived 4 (LOC100167415), partial mRNA	5.51716	1.01347e-12	ACYPI067645	Tigger transposable element-derived protein 6
ACYPI009504-RA RefSeq transcript XM_001952069 PREDICTED: Acyrthosiphon pisum similar to prolyl 4-hydroxylase alpha subunit 1, putative (LOC100168835), partial mRNA	5.51405	3.54805e-19	ACYPI009504
ACYPI009434-RA RefSeq transcript XM_001952386 PREDICTED: Acyrthosiphon pisum similar to zinc/iron transporter (LOC100168760), mRNA	5.50692	5.38588e-09	ACYPI009434
ACYPI008471-RA RefSeq transcript XM_001945467 PREDICTED: Acyrthosiphon pisum similar to deoxyribonuclease I, putative (LOC100167701), mRNA	5.4979	5.87566e-20	ACYPI008471
ACYPI006072-RA RefSeq transcript XM_001950475 PREDICTED: Acyrthosiphon pisum similar to sodium-dependent phosphate transporter (LOC100165106), partial mRNA	5.49698	4.71361e-12	ACYPI006072
ACYPI010068-RA RefSeq transcript XM_001952129 PREDICTED: Acyrthosiphon pisum similar to AGAP012527-PA (LOC100169452), mRNA	5.48887	2.10223e-18	ACYPI010068
ACYPI005726-RA RefSeq transcript XM_001945606 PREDICTED: Acyrthosiphon pisum similar to CG17034 CG17034-PD (LOC100164736), partial mRNA	5.48877	1.2129e-06	ACYPI005726
ACYPI001041-RA RefSeq transcript XM_001951597 PREDICTED: Acyrthosiphon pisum similar to glucosyl/glucuronosyl transferases (LOC100159691), mRNA	5.48375	6.43344e-10	ACYPI001041	glucosyl/glucuronosyl transferases
ACYPI45356-RA Glean transcript GLEAN_25356	5.47803	1.03803e-21	ACYPI45356
ACYPI000475-RA RefSeq transcript XM_001952320 PREDICTED: Acyrthosiphon pisum similar to AGAP012307-PA (LOC100159066), mRNA	5.4528	3.26632e-07	ACYPI000475	AGAP012813-PA
ACYPI34724-RA Glean transcript GLEAN_14724	5.44237	1.45302e-13
ACYPI008073-RA RefSeq transcript XM_001943535 PREDICTED: Acyrthosiphon pisum similar to cytochrome P450 CYP6AX1 protein (LOC100167264), mRNA	5.42429	3.18425e-18
ACYPI002177-RA RefSeq transcript XM_001952446 PREDICTED: Acyrthosiphon pisum hypothetical protein LOC100160911 (LOC100160911), partial mRNA	5.41939	1.63953e-12	ACYPI002177	uncharacterized protein
ACYPI003240-RA RefSeq transcript XM_001948491 PREDICTED: Acyrthosiphon pisum similar to slimfast CG11128-PC (LOC100162060), partial mRNA	5.41509	2.00146e-16	ACYPI003240	cationic amino acid transporter
ACYPI004320-RA RefSeq transcript XM_001944847 PREDICTED: Acyrthosiphon pisum similar to amino acid transporter (LOC100163220), mRNA	5.39741	5.10962e-08	ACYPI004320
ACYPI003533-RA RefSeq transcript XM_001946790 PREDICTED: Acyrthosiphon pisum similar to oligopeptide transporter (LOC100162378), mRNA	5.38645	1.84648e-11
ACYPI38332-RA Glean transcript GLEAN_18332	5.38636	4.90246e-21	ACYPI38332
ACYPI35639-RA Glean transcript GLEAN_15639	5.3857	3.18425e-18
ACYPI38416-RA Glean transcript GLEAN_18416	5.37064	1.28897e-22	ACYPI38416	CG1105
ACYPI005252-RA RefSeq transcript XM_001946676 PREDICTED: Acyrthosiphon pisum similar to sodium-dependent phosphate transporter (LOC100164217), mRNA	5.36989	1.01072e-19	ACYPI005252	Na( )-dependent inorganic phosphate cotransporter
ACYPI004595-RA RefSeq transcript XM_001945303 PREDICTED: Acyrthosiphon pisum similar to oligopeptide transporter (LOC100163510), mRNA	5.36043	4.61417e-09	ACYPI004595
ACYPI46331-RA Glean transcript GLEAN_26331	5.35008	9.01954e-29	ACYPI46331	protein Phum_PHUM454910
ACYPI000490-RA RefSeq transcript XM_001952253 PREDICTED: Acyrthosiphon pisum hypothetical protein LOC100159087 (LOC100159087), mRNA	5.34783	2.57325e-08	ACYPI000490	uncharacterized protein
ACYPI006451-RA RefSeq transcript XM_001947508 PREDICTED: Acyrthosiphon pisum similar to delta-9 desaturase 1 (LOC100165504), mRNA	5.34478	7.79039e-10	ACYPI006451
ACYPI000243-RA RefSeq transcript XM_001951680 PREDICTED: Acyrthosiphon pisum similar to CG1674 CG1674-PA (LOC100158817), mRNA	5.34461	2.03739e-13	ACYPI000243
ACYPI007068-RA RefSeq transcript XM_001943272 PREDICTED: Acyrthosiphon pisum similar to transcription factor GATA-4 (GATA binding factor-4) (LOC100166174), mRNA	5.33263	#VALUE!	ACYPI007068	gata-binding factor a transcription factor gata-a dgata-a protein pannier
ACYPI53098-RA Glean transcript GLEAN_33098	5.3296	2.24441e-24	ACYPI53098
ACYPI27463-RA Glean transcript GLEAN_07463	5.31515	2.06727e-11
ACYPI008473-RA RefSeq transcript XM_001948899 PREDICTED: Acyrthosiphon pisum similar to cytochrome P450 CYP6AX1 protein (LOC100167704), mRNA	5.29711	6.86616e-20	ACYPI008473
ACYPI000120-RA RefSeq transcript XM_001951032 PREDICTED: Acyrthosiphon pisum similar to CG12355 CG12355-PB (LOC100158680), mRNA	5.29669	2.13429e-11	ACYPI000120
ACYPI008413-RA RefSeq transcript XM_001945670 PREDICTED: Acyrthosiphon pisum similar to Juvenile hormone-inducible protein, putative (LOC100167634), mRNA	5.29545	7.88332e-13	ACYPI008413	juvenile hormone-inducible protein
ACYPI35619-RA Glean transcript GLEAN_15619	5.2882	6.6087e-13
ACYPI004987-RA RefSeq transcript XM_001946493 PREDICTED: Acyrthosiphon pisum similar to EF-hand calcium binding domain 4B (LOC100163938), mRNA	5.27812	2.34215e-18	ACYPI004987	EF-hand calcium binding domain 4B
ACYPI004486-RA RefSeq transcript XM_001947105 PREDICTED: Acyrthosiphon pisum similar to muscular protein 20 (LOC100163395), mRNA	5.26171	5.85665e-06	ACYPI008516	muscle-specific protein
ACYPI26958-RA Glean transcript GLEAN_06958	5.25527	1.0357e-17	ACYPI000817
ACYPI001166-RA RefSeq transcript XM_001949263 PREDICTED: Acyrthosiphon pisum similar to long-chain-fatty-acid coa ligase (LOC100159821), mRNA	5.254	4.69707e-07	ACYPI001166	long-chain-fatty-acid--coa ligase
ACYPI004904-RA RefSeq transcript XM_001951828 PREDICTED: Acyrthosiphon pisum hypothetical protein LOC100163848 (LOC100163848), mRNA	5.24213	1.52899e-13	ACYPI004904
ACYPI000431-RA RefSeq transcript XM_001949318 PREDICTED: Acyrthosiphon pisum similar to chloride channel protein 7 (LOC100159020), mRNA	5.23324	2.11384e-08	ACYPI000431	chloride channel protein
ACYPI52134-RA Glean transcript GLEAN_32134	5.21075	5.6904e-22	ACYPI008595	Multidrug resistance protein 4
ACYPI002039-RA RefSeq transcript XM_001944766 PREDICTED: Acyrthosiphon pisum similar to AGAP006873-PA (LOC100160768), mRNA	5.19549	2.55629e-14	ACYPI002039	ras-related protein rab-8a
ACYPI000006-RA RefSeq transcript NM_001126138 gi|187097099|ref|NM_001126138.1 Acyrthosiphon pisum cathepsin B-1852 (Catb-1852), mRNA	5.19242	0.00209212	ACYPI000006
ACYPI009503-RA RefSeq transcript XM_001951072 PREDICTED: Acyrthosiphon pisum similar to juvenile hormone esterase (LOC100168834), mRNA	5.17726	8.56863e-13	ACYPI009503
ACYPI000008-RA RefSeq transcript NM_001126140 gi|187099103|ref|NM_001126140.1 Acyrthosiphon pisum cathepsin B-912 (Catb-912), mRNA	5.16086	0.000364186	ACYPI000008
ACYPI004993-RA RefSeq transcript XM_001948289 PREDICTED: Acyrthosiphon pisum similar to conserved hypothetical protein (LOC100163944), partial mRNA	5.1483	1.45806e-12	ACYPI004993	CD9 antigen
ACYPI008763-RA RefSeq transcript XM_001949802 PREDICTED: Acyrthosiphon pisum similar to heat shock protein 70 B2 (LOC100168026), mRNA	5.14277	1.02018e-16	ACYPI008763
ACYPI003624-RA RefSeq transcript XM_001947255 PREDICTED: Acyrthosiphon pisum similar to GA21132-PA (LOC100162474), mRNA	5.12816	1.32163e-05	ACYPI008168
ACYPI55148-RA Glean transcript GLEAN_35148	5.12635	5.31123e-24	ACYPI55148	uncharacterized protein
ACYPI003833-RA RefSeq transcript XM_001944656 PREDICTED: Acyrthosiphon pisum similar to acetylcholinesterase (LOC100162694), partial mRNA	5.12265	4.02542e-09	ACYPI003833	Acetylcholinesterase
ACYPI006450-RA RefSeq transcript XM_001945707 PREDICTED: Acyrthosiphon pisum similar to prolyl 4-hydroxylase alpha subunit 1, putative (LOC100165503), mRNA	5.12205	5.4088e-10	ACYPI006450	Prolyl 4-hydroxylase alpha-related protein PH4[alpha]EFB
ACYPI001507-RA RefSeq transcript XM_001948701 PREDICTED: Acyrthosiphon pisum similar to canalicular multispecific organic anion transporter 1 (LOC100160192), mRNA	5.11751	3.13813e-06	ACYPI001507	multidrug resistance protein 2 atp-binding cassette protein c
ACYPI35648-RA Glean transcript GLEAN_15648	5.11395	4.32596e-17	ACYPI35648	uncharacterized protein
ACYPI001701-RA RefSeq transcript XM_001949467 PREDICTED: Acyrthosiphon pisum similar to cytochrome P450 CYP15A1 (LOC100160402), partial mRNA	5.10819	3.42644e-12	ACYPI001701	Cytochrome P450 15A1
ACYPI009533-RA RefSeq transcript XM_001948953 PREDICTED: Acyrthosiphon pisum similar to acetylcholinesterase 2 (LOC100168865), mRNA	5.10223	7.18303e-16	ACYPI009533	Acetylcholinesterase 2
ACYPI006043-RA RefSeq transcript XM_001951285 PREDICTED: Acyrthosiphon pisum similar to myosin light chain (LOC100165074), mRNA	5.0927	1.34619e-16	ACYPI006043	Myosin regulatory light chain 2
ACYPI004532-RA RefSeq transcript XM_001951801 PREDICTED: Acyrthosiphon pisum similar to 24-dehydrocholesterol reductase (LOC100163443), mRNA	5.09245	1.54689e-07	ACYPI004532	delta(24)-sterol reductase-like
ACYPI001390-RA RefSeq transcript XM_001949216 PREDICTED: Acyrthosiphon pisum similar to AGAP006427-PB (LOC100160058), partial mRNA	5.07802	2.17555e-12	ACYPI001390
ACYPI005351-RA RefSeq transcript XM_001948928 PREDICTED: Acyrthosiphon pisum hypothetical protein LOC100164323 (LOC100164323), mRNA	5.07757	5.79043e-12	ACYPI005351	uncharacterized protein
ACYPI008667-RA RefSeq transcript XM_001952372 PREDICTED: Acyrthosiphon pisum hypothetical protein LOC100167919 (LOC100167919), mRNA	5.07686	9.82137e-14	ACYPI008667
ACYPI55550-RA Glean transcript GLEAN_35550	5.07512	6.78039e-28
ACYPI006869-RA RefSeq transcript XM_001951695 PREDICTED: Acyrthosiphon pisum similar to CG2663 CG2663-PB (LOC100165958), mRNA	5.06927	6.48218e-09	ACYPI006869
ACYPI004170-RA RefSeq transcript XM_001943554 PREDICTED: Acyrthosiphon pisum similar to carboxypeptidase m (LOC100163058), mRNA	5.06457	6.57814e-09	ACYPI004170
ACYPI003811-RA RefSeq transcript XM_001951089 PREDICTED: Acyrthosiphon pisum similar to synaptic vesicle protein (LOC100162670), mRNA	5.05586	3.68022e-10	ACYPI003811	Synaptic vesicle glycoprotein 2B
ACYPI000606-RA RefSeq transcript XM_001952194 PREDICTED: Acyrthosiphon pisum similar to CG14205 CG14205-PA (LOC100159213), mRNA	5.05242	2.23792e-05	ACYPI000606	uncharacterized protein
ACYPI002337-RA RefSeq transcript XM_001949979 PREDICTED: Acyrthosiphon pisum similar to sodium-dependent phosphate transporter (LOC100161085), mRNA	5.04049	7.8533e-09	ACYPI002337
ACYPI000027-RA RefSeq transcript NM_001126154 gi|187111147|ref|NM_001126154.1 Acyrthosiphon pisum myosin alkali light chain 1 (Mlc1), mRNA	5.03376	9.31741e-06	ACYPI000027	Myosin light chain alkali
ACYPI54530-RA Glean transcript GLEAN_34530	5.01958	6.74851e-33
ACYPI46732-RA Glean transcript GLEAN_26732	5.01955	6.61591e-19	ACYPI46732
ACYPI006800-RA RefSeq transcript XM_001946293 PREDICTED: Acyrthosiphon pisum similar to lim homeobox protein (LOC100165883), mRNA	5.01499	8.83052e-15	ACYPI006800
ACYPI20274-RA Glean transcript GLEAN_00274	5.00793	1.5082e-17	ACYPI20274	Kelch-like protein 3
ACYPI002830-RA RefSeq transcript XM_001949683 PREDICTED: Acyrthosiphon pisum similar to AGAP002331-PA (LOC100161621), partial mRNA	4.99716	1.61628e-07	ACYPI002830	sulfate transporter
ACYPI009180-RA RefSeq transcript XM_001951524 PREDICTED: Acyrthosiphon pisum similar to predicted protein (LOC100168485), mRNA	4.991	1.14971e-24	ACYPI009180
ACYPI28199-RA Glean transcript GLEAN_08199	4.9785	1.10485e-14	ACYPI28199
ACYPI55433-RA Glean transcript GLEAN_35433	4.97056	2.57675e-26
ACYPI37540-RA Glean transcript GLEAN_17540	4.96596	4.83747e-24	ACYPI37540
ACYPI47142-RA Glean transcript GLEAN_27142	4.95671	3.45455e-23	ACYPI47142
ACYPI007360-RA RefSeq transcript XM_001945267 PREDICTED: Acyrthosiphon pisum similar to ventral nerve cord defective protein (LOC100166494), mRNA	4.94566	2.09737e-12	ACYPI007360	ventral nerve cord defective protein
ACYPI003108-RA RefSeq transcript XM_001943913 PREDICTED: Acyrthosiphon pisum similar to AGAP005840-PA (LOC100161921), mRNA	4.93706	6.98126e-12	ACYPI001728
ACYPI30461-RA Glean transcript GLEAN_10461	4.9294	8.17335e-19
ACYPI33102-RA Glean transcript GLEAN_13102	4.92306	2.73914e-21
ACYPI003695-RA RefSeq transcript XM_001945738 PREDICTED: Acyrthosiphon pisum hypothetical protein LOC100162547 (LOC100162547), mRNA	4.92065	1.77658e-07	ACYPI003695
ACYPI005009-RA RefSeq transcript XM_001951984 PREDICTED: Acyrthosiphon pisum hypothetical protein LOC100163961 (LOC100163961), mRNA	4.91394	3.34591e-10	ACYPI005009	uncharacterized protein
ACYPI21777-RA Glean transcript GLEAN_01777	4.91188	4.34088e-20	ACYPI21777
ACYPI49505-RA Glean transcript GLEAN_29505	4.90514	7.08853e-26	ACYPI49505
ACYPI20880-RA Glean transcript GLEAN_00880	4.89241	4.16688e-20	ACYPI20880
ACYPI006913-RA RefSeq transcript XM_001947185 PREDICTED: Acyrthosiphon pisum similar to NFX1-type zinc finger-containing protein 1 (LOC100166005), mRNA	4.88497	3.41035e-15	ACYPI006913
ACYPI005629-RA RefSeq transcript XM_001950654 PREDICTED: Acyrthosiphon pisum similar to dynamin 1-like (LOC100164635), mRNA	4.87149	8.72055e-15	ACYPI005629	Dynamin-1-like protein
ACYPI006995-RA RefSeq transcript XM_001947102 PREDICTED: Acyrthosiphon pisum similar to subtilisin-related protease SPC3 (LOC100166094), partial mRNA	4.86628	1.67302e-18	ACYPI006995	prohormone convertase 1 precursor
ACYPI45102-RA Glean transcript GLEAN_25102	4.85887	2.72242e-18	ACYPI45102	uncharacterized protein
ACYPI36736-RA Glean transcript GLEAN_16736	4.85621	5.10597e-14	ACYPI36736	uncharacterized protein
ACYPI008422-RA RefSeq transcript XM_001950420 PREDICTED: Acyrthosiphon pisum hypothetical protein LOC100167645 (LOC100167645), mRNA	4.85523	9.60442e-14	ACYPI008422	uncharacterized protein
ACYPI001541-RA RefSeq transcript XM_001943642 PREDICTED: Acyrthosiphon pisum hypothetical protein LOC100160226 (LOC100160226), mRNA	4.85401	2.73269e-08	ACYPI001541	uncharacterized protein
ACYPI007964-RA RefSeq transcript XM_001944770 PREDICTED: Acyrthosiphon pisum similar to serine protease 1 (LOC100167148), mRNA	4.85103	6.72567e-20	ACYPI007964	Prostasin
ACYPI23911-RA Glean transcript GLEAN_03911	4.84725	4.31471e-17	ACYPI061687
ACYPI005339-RA RefSeq transcript XM_001948626 PREDICTED: Acyrthosiphon pisum similar to ATP-dependent bile acid permease (LOC100164310), mRNA	4.83486	1.80725e-18	ACYPI005339
ACYPI21841-RA Glean transcript GLEAN_01841	4.83361	3.55236e-16	ACYPI21841	uncharacterized protein
ACYPI47476-RA Glean transcript GLEAN_27476	4.8313	4.17926e-23	ACYPI47476
ACYPI33027-RA Glean transcript GLEAN_13027	4.82217	3.14924e-18	ACYPI33027
ACYPI35312-RA Glean transcript GLEAN_15312	4.81936	4.17739e-26	ACYPI35312
ACYPI004134-RA RefSeq transcript XM_001942737 PREDICTED: Acyrthosiphon pisum similar to CG32204 CG32204-PB (LOC100163019), partial mRNA	4.80963	8.69206e-10
ACYPI008839-RA RefSeq transcript XM_001943149 PREDICTED: Acyrthosiphon pisum similar to AGAP012447-PA (LOC100168111), mRNA	4.79599	8.4422e-12	ACYPI008839	uncharacterized protein
ACYPI52349-RA Glean transcript GLEAN_32349	4.79347	3.66646e-25	ACYPI52349
ACYPI006035-RA RefSeq transcript XM_001948422 PREDICTED: Acyrthosiphon pisum similar to Actin-87E (LOC100165066), mRNA	4.79115	2.04475e-17	ACYPI006035
ACYPI25076-RA Glean transcript GLEAN_05076	4.78492	2.84024e-24
ACYPI007553-RA RefSeq transcript XM_001949084 PREDICTED: Acyrthosiphon pisum hypothetical protein LOC100166702, transcript variant 1 (LOC100166702), mRNA	4.78421	1.45753e-11	ACYPI081014
ACYPI54406-RA Glean transcript GLEAN_34406	4.78301	1.42935e-29	ACYPI54406
ACYPI007756-RA RefSeq transcript XM_001948948 PREDICTED: Acyrthosiphon pisum similar to lipase (LOC100166920), mRNA	4.77837	1.45204e-14	ACYPI007756	Pancreatic lipase-related protein 2
ACYPI009956-RA RefSeq transcript XM_001949935 PREDICTED: Acyrthosiphon pisum similar to Ab1-133 (LOC100169328), mRNA	4.7621	1.32709e-15	ACYPI009956
ACYPI006846-RA RefSeq transcript XM_001950116 PREDICTED: Acyrthosiphon pisum similar to glucosyl/glucuronosyl transferases (LOC100165933), mRNA	4.75676	1.3415e-10	ACYPI006846
ACYPI002202-RA RefSeq transcript XM_001945171 PREDICTED: Acyrthosiphon pisum similar to maleless CG11680-PA (LOC100160936), mRNA	4.75414	2.07775e-16	ACYPI002202	ATP-dependent RNA helicase A
ACYPI23809-RA Glean transcript GLEAN_03809	4.75267	7.28543e-19
ACYPI002224-RA RefSeq transcript XM_001944005 PREDICTED: Acyrthosiphon pisum similar to predicted protein (LOC100160963), mRNA	4.73471	5.46538e-13	ACYPI002224
ACYPI55275-RA Glean transcript GLEAN_35275	4.72236	4.8102e-24	ACYPI55275
ACYPI007228-RA RefSeq transcript XM_001950635 PREDICTED: Acyrthosiphon pisum similar to neuroglobin (LOC100166348), mRNA	4.71298	7.48187e-19	ACYPI007228	neuroglobin
ACYPI30724-RA Glean transcript GLEAN_10724	4.70523	4.83557e-22	ACYPI30724
ACYPI003980-RA RefSeq transcript XM_001944933 PREDICTED: Acyrthosiphon pisum similar to calcium/calmodulin-dependent 3,5-cyclic nucleotide phosphodiesterase (LOC100162857), partial mRNA	4.70105	6.5093e-09	ACYPI003980	calcium/calmodulin-dependent nucleotide phosphodiesterase
ACYPI000013-RA RefSeq transcript NM_001126145 gi|187104113|ref|NM_001126145.1 Acyrthosiphon pisum cathepsin B-16A (Catb-16a), mRNA	4.70051	3.43288e-09
ACYPI000226-RA RefSeq transcript XM_001943719 PREDICTED: Acyrthosiphon pisum similar to glucosyl/glucuronosyl transferases (LOC100158795), mRNA	4.70006	9.83357e-07	ACYPI000226	AGAP007028-PA
ACYPI52491-RA Glean transcript GLEAN_32491	4.69741	2.34723e-26	ACYPI52491
ACYPI20273-RA Glean transcript GLEAN_00273	4.67872	6.12445e-20	ACYPI20273	ring canal kelch protein
ACYPI007680-RB RefSeq transcript XM_001949875 PREDICTED: Acyrthosiphon pisum similar to conserved hypothetical protein, transcript variant 2 (LOC100166840), mRNA	4.67296	2.47975e-10	ACYPI007680
ACYPI001014-RA RefSeq transcript XM_001952745 PREDICTED: Acyrthosiphon pisum similar to AGAP002441-PA (LOC100159663), mRNA	4.6726	1.82546e-11
ACYPI29940-RA Glean transcript GLEAN_09940	4.6576	1.38089e-24	ACYPI006475	Sodium/potassium-transporting ATPase subunit beta-2
ACYPI009637-RA RefSeq transcript XM_001945286 PREDICTED: Acyrthosiphon pisum similar to Na[+]-dependent inorganic phosphate cotransporter CG10207-PA (LOC100168978), mRNA	4.6565	1.81489e-15	ACYPI009637
ACYPI002609-RB RefSeq transcript XM_001943904 PREDICTED: Acyrthosiphon pisum similar to Zeelin1 CG6803-PD, transcript variant 2 (LOC100161385), mRNA	4.64232	4.25599e-07
ACYPI008565-RA RefSeq transcript XM_001942530 PREDICTED: Acyrthosiphon pisum similar to glucosyl/glucuronosyl transferases (LOC100167806), mRNA	4.64044	1.30851e-19	ACYPI008565	Glucosyl/glucuronosyl transferases
ACYPI49006-RA Glean transcript GLEAN_29006	4.63363	3.13946e-28
ACYPI005960-RA RefSeq transcript XM_001952068 PREDICTED: Acyrthosiphon pisum similar to predicted protein (LOC100164985), mRNA	4.62954	0.000828184	ACYPI005960
ACYPI37969-RA Glean transcript GLEAN_17969	4.62455	6.19781e-17	ACYPI37969
ACYPI000779-RA RefSeq transcript XM_001943208 PREDICTED: Acyrthosiphon pisum similar to sucrase (LOC100159406), partial mRNA	4.61906	1.0403e-09	ACYPI002020
ACYPI007792-RA RefSeq transcript XM_001948166 PREDICTED: Acyrthosiphon pisum similar to GA19694-PA (LOC100166960), mRNA	4.61669	3.34699e-16	ACYPI007792	mgc165775 protein
ACYPI006975-RA RefSeq transcript XM_001943204 PREDICTED: Acyrthosiphon pisum similar to AGAP012447-PA (LOC100166072), mRNA	4.59948	9.32112e-13	ACYPI006975	uncharacterized protein
ACYPI000668-RA RefSeq transcript XM_001947739 PREDICTED: Acyrthosiphon pisum similar to CG30296 CG30296-PD (LOC100159280), mRNA	4.5963	1.50832e-09	ACYPI000668	CG30296
ACYPI003894-RA RefSeq transcript XM_001952144 PREDICTED: Acyrthosiphon pisum similar to dynamin-like protein Dymple (LOC100162764), partial mRNA	4.59067	3.04124e-14	ACYPI003894	Dynamin-1-like protein
ACYPI009653-RA RefSeq transcript XM_001947630 PREDICTED: Acyrthosiphon pisum similar to predicted protein (LOC100168995), mRNA	4.58397	2.73578e-17	ACYPI009653
ACYPI30120-RA Glean transcript GLEAN_10120	4.57912	7.99039e-15
ACYPI003752-RA RefSeq transcript XM_001951672 PREDICTED: Acyrthosiphon pisum hypothetical protein LOC100162606 (LOC100162606), mRNA	4.57199	8.20083e-17	ACYPI003752	uncharacterized protein
ACYPI003692-RA RefSeq transcript XM_001952286 PREDICTED: Acyrthosiphon pisum similar to CG2254 CG2254-PA (LOC100162544), mRNA	4.57136	5.18986e-07	ACYPI003692	GI11003
ACYPI004558-RA RefSeq transcript XM_001946237 PREDICTED: Acyrthosiphon pisum similar to AGAP001061-PA (LOC100163469), mRNA	4.56357	2.7356e-11	ACYPI004558
ACYPI007057-RA RefSeq transcript XM_001944795 PREDICTED: Acyrthosiphon pisum similar to hyaluronidase (LOC100166159), mRNA	4.55355	1.22839e-13	ACYPI007057	Hyaluronidase
ACYPI008993-RA RefSeq transcript XM_001944512 PREDICTED: Acyrthosiphon pisum similar to calponin/transgelin (LOC100168275), mRNA	4.54989	7.98511e-18	ACYPI008993
ACYPI008900-RA RefSeq transcript XM_001950645 PREDICTED: Acyrthosiphon pisum similar to AGAP004457-PA (LOC100168174), mRNA	4.5489	1.30823e-17	ACYPI008900	sugar transporter
ACYPI56502-RA Glean transcript GLEAN_36502	4.53775	7.64207e-42	ACYPI56502	uncharacterized protein
ACYPI005171-RA RefSeq transcript XM_001951546 PREDICTED: Acyrthosiphon pisum similar to AGAP005866-PA (LOC100164132), mRNA	4.53463	7.29703e-13	ACYPI005171	aspartate
ACYPI001148-RA RefSeq transcript XM_001947729 PREDICTED: Acyrthosiphon pisum similar to AGAP010241-PA (LOC100159801), mRNA	4.51899	0.00447247	ACYPI001148
ACYPI001330-RA RefSeq transcript XM_001948187 PREDICTED: Acyrthosiphon pisum similar to acid phosphatase-1 (LOC100159996), mRNA	4.51563	5.69301e-09	ACYPI001330
ACYPI003420-RA RefSeq transcript XM_001951364 PREDICTED: Acyrthosiphon pisum similar to AGAP000679-PA (LOC100162258), mRNA	4.51481	1.32406e-13	ACYPI003420	Aminoacylase-1
ACYPI007153-RA RefSeq transcript XM_001943731 PREDICTED: Acyrthosiphon pisum similar to AGAP000232-PA (LOC100166269), mRNA	4.50951	3.71569e-17	ACYPI007153
ACYPI002633-RA RefSeq transcript XM_001942478 PREDICTED: Acyrthosiphon pisum similar to slimfast CG11128-PC (LOC100161412), partial mRNA	4.49582	3.41284e-11	ACYPI002633	cationic amino acid transporter
ACYPI29278-RA Glean transcript GLEAN_09278	4.48616	5.73306e-16	ACYPI29278
ACYPI000856-RA RefSeq transcript XM_001950100 PREDICTED: Acyrthosiphon pisum similar to arylalkylamine N-acetyltransferase (LOC100159490), mRNA	4.48227	1.04834e-08	ACYPI000856	Arylalkylamine N-acetyltransferase
ACYPI007874-RA RefSeq transcript XM_001951818 PREDICTED: Acyrthosiphon pisum similar to tubulointerstitial nephritis antigen (LOC100167051), mRNA	4.47885	1.33175e-09	ACYPI001407
ACYPI37729-RA Glean transcript GLEAN_17729	4.47625	3.75915e-22	ACYPI37729
ACYPI000472-RA RefSeq transcript XM_001952191 PREDICTED: Acyrthosiphon pisum hypothetical protein LOC100159063 (LOC100159063), mRNA	4.45551	0.0255138	ACYPI000472
ACYPI31751-RA Glean transcript GLEAN_11751	4.44434	4.17406e-23
ACYPI000558-RA RefSeq transcript XM_001947076 PREDICTED: Acyrthosiphon pisum hypothetical protein LOC100159160 (LOC100159160), partial mRNA	4.44015	1.91042e-06	ACYPI000558	uncharacterized protein
ACYPI29666-RA Glean transcript GLEAN_09666	4.43588	1.81489e-15
ACYPI30803-RA Glean transcript GLEAN_10803	4.42047	1.14971e-24
ACYPI001176-RA RefSeq transcript XM_001946472 PREDICTED: Acyrthosiphon pisum similar to Luciferase (LOC100159834), partial mRNA	4.41672	1.92916e-14	ACYPI070521
ACYPI003979-RA RefSeq transcript XM_001950302 PREDICTED: Acyrthosiphon pisum hypothetical protein LOC100162856 (LOC100162856), mRNA	4.414	1.31588e-05	ACYPI003979	uncharacterized protein
ACYPI55413-RA Glean transcript GLEAN_35413	4.40481	2.2674e-28	ACYPI55413	Ring canal kelch homolog
ACYPI003175-RA RefSeq transcript XM_001947201 PREDICTED: Acyrthosiphon pisum similar to subtilisin-related protease SPC3 (LOC100161992), mRNA	4.40002	1.27775e-16	ACYPI003175	prohormone convertase 1 precursor
ACYPI008696-RA RefSeq transcript XM_001945690 PREDICTED: Acyrthosiphon pisum similar to lipase (LOC100167950), mRNA	4.39534	1.2165e-18	ACYPI008696	AGAP007991-PA
ACYPI009807-RA RefSeq transcript XM_001945899 PREDICTED: Acyrthosiphon pisum similar to cytochrome P450 CYP15A1 (LOC100169165), mRNA	4.39022	3.58064e-11	ACYPI009807
ACYPI004597-RA RefSeq transcript XM_001945344 PREDICTED: Acyrthosiphon pisum similar to leucine-rich transmembrane protein (LOC100163512), mRNA	4.38952	2.07469e-10	ACYPI004597	Leucine-rich transmembrane protein
ACYPI007514-RA RefSeq transcript XM_001949355 PREDICTED: Acyrthosiphon pisum similar to CG2010 CG2010-PA (LOC100166660), mRNA	4.38827	4.42715e-09	ACYPI007514	f-box/leucine rich repeat protein
ACYPI31143-RA Glean transcript GLEAN_11143	4.3709	2.12871e-20	ACYPI086363
ACYPI005278-RA RefSeq transcript XM_001951156 PREDICTED: Acyrthosiphon pisum similar to lipase 1 (LOC100164245), mRNA	4.3668	1.03343e-18	ACYPI005278
ACYPI003186-RA RefSeq transcript XM_001948245 PREDICTED: Acyrthosiphon pisum similar to nadp transhydrogenase (LOC100162003), mRNA	4.36006	0.000629131	ACYPI003186
ACYPI008207-RA RefSeq transcript XM_001948347 PREDICTED: Acyrthosiphon pisum similar to putative kelch-like protein 1 (LOC100167408), mRNA	4.35898	1.9888e-21	ACYPI008207
ACYPI010037-RA RefSeq transcript XM_001945248 PREDICTED: Acyrthosiphon pisum similar to serine protease 1 (LOC100169416), mRNA	4.35423	2.79578e-22	ACYPI010037	Limulus clotting factor C
ACYPI30693-RA Glean transcript GLEAN_10693	4.34287	5.07211e-25	ACYPI30693	Polycystic kidney disease 2
ACYPI42641-RA Glean transcript GLEAN_22641	4.34029	2.36041e-23
ACYPI56466-RA Glean transcript GLEAN_36466	4.33548	2.16659e-31	ACYPI56466	Adenylate cyclase
ACYPI010036-RA RefSeq transcript XM_001947043 PREDICTED: Acyrthosiphon pisum similar to nuclear factor I/X (LOC100169415), partial mRNA	4.33059	4.00146e-19	ACYPI010036	Nuclear factor 1
ACYPI42456-RA Glean transcript GLEAN_22456	4.31636	2.0122e-25	ACYPI42456	uncharacterized protein
ACYPI007787-RA RefSeq transcript XM_001942582 PREDICTED: Acyrthosiphon pisum similar to NRPS-like enzyme, putative (LOC100166955), mRNA	4.31256	2.02492e-18	ACYPI007787	Mycosubtilin synthase subunit B
ACYPI008017-RA RefSeq transcript XM_001949074 PREDICTED: Acyrthosiphon pisum hypothetical protein LOC100167204 (LOC100167204), mRNA	4.31019	4.18641e-12	ACYPI085962	uncharacterized protein
ACYPI29517-RA Glean transcript GLEAN_09517	4.30812	5.04191e-22	ACYPI29517	class b secretin-like g-protein coupled receptor gprmth4
ACYPI010012-RA RefSeq transcript XM_001951870 PREDICTED: Acyrthosiphon pisum similar to cytochrome P450 (LOC100169387), mRNA	4.30644	7.56228e-18
ACYPI005834-RB RefSeq transcript XM_001944201 PREDICTED: Acyrthosiphon pisum hypothetical protein LOC100164849, transcript variant 2 (LOC100164849), mRNA	4.30281	2.16294e-07	ACYPI085486
ACYPI48070-RA Glean transcript GLEAN_28070	4.30096	1.03846e-22	ACYPI48070	CG1105
ACYPI001433-RA RefSeq transcript XM_001947195 PREDICTED: Acyrthosiphon pisum similar to MGC165775 protein (LOC100160108), mRNA	4.2973	8.06707e-14	ACYPI001433	mgc165775 protein
ACYPI002831-RA RefSeq transcript XM_001948407 PREDICTED: Acyrthosiphon pisum similar to membrane alanyl aminopeptidase N (LOC100161622), mRNA	4.29103	7.87802e-08	ACYPI002831
ACYPI006559-RA RefSeq transcript XM_001950497 PREDICTED: Acyrthosiphon pisum hypothetical protein LOC100165624 (LOC100165624), mRNA	4.2866	3.98161e-10	ACYPI006559	uncharacterized protein
ACYPI006411-RA RefSeq transcript XM_001942904 PREDICTED: Acyrthosiphon pisum similar to AGAP000798-PA (LOC100165460), mRNA	4.28413	1.28064e-09	ACYPI004687
ACYPI29806-RA Glean transcript GLEAN_09806	4.28364	5.43841e-24	ACYPI29806	uncharacterized protein
ACYPI55625-RA Glean transcript GLEAN_35625	4.27372	2.22644e-29	ACYPI55625
ACYPI55076-RA Glean transcript GLEAN_35076	4.27013	1.93799e-29
ACYPI009959-RA RefSeq transcript XM_001951274 PREDICTED: Acyrthosiphon pisum similar to lethal(2)essential for life protein-like protein (LOC100169331), mRNA	4.26331	1.33303e-18	ACYPI009959
ACYPI001843-RA RefSeq transcript XM_001952587 PREDICTED: Acyrthosiphon pisum hypothetical protein LOC100160554 (LOC100160554), mRNA	4.26302	1.38213e-05	ACYPI001843	uncharacterized protein
ACYPI30835-RA Glean transcript GLEAN_10835	4.26172	8.02392e-19	ACYPI30835	sugar transporter
ACYPI003132-RA RefSeq transcript XM_001949388 PREDICTED: Acyrthosiphon pisum similar to alpha-amylase (LOC100161946), mRNA	4.24837	9.51641e-15	ACYPI003132	IP13460p
ACYPI39563-RA Glean transcript GLEAN_19563	4.24768	3.43247e-21	ACYPI39563
ACYPI003586-RA RefSeq transcript XM_001944556 PREDICTED: Acyrthosiphon pisum similar to glucosyl/glucuronosyl transferases (LOC100162434), partial mRNA	4.24671	2.72896e-11	ACYPI003586	AGAP007028-PA
ACYPI004394-RA RefSeq transcript XM_001951516 PREDICTED: Acyrthosiphon pisum hypothetical protein LOC100163300 (LOC100163300), mRNA	4.23675	6.08451e-16	ACYPI004394	uncharacterized protein
ACYPI002577-RA RefSeq transcript XM_001951002 PREDICTED: Acyrthosiphon pisum similar to adenylate kinase 1b (LOC100161348), mRNA	4.22919	1.29893e-17	ACYPI002577
ACYPI009912-RB RefSeq transcript XM_001943256 PREDICTED: Acyrthosiphon pisum similar to RE12057p, transcript variant 2 (LOC100169280), mRNA	4.229	1.13494e-13
ACYPI001181-RA RefSeq transcript XM_001951831 PREDICTED: Acyrthosiphon pisum similar to carboxylesterase; esterase FE4 (LOC100159839), mRNA	4.21049	1.05864e-05	ACYPI001181
ACYPI008180-RA RefSeq transcript XM_001944248 PREDICTED: Acyrthosiphon pisum similar to myosin light chain kinase (LOC100167381), partial mRNA	4.20177	3.9972e-21	ACYPI008180	Titin
ACYPI002944-RA RefSeq transcript XM_001949949 PREDICTED: Acyrthosiphon pisum hypothetical protein LOC100161744 (LOC100161744), mRNA	4.19221	0.00124309	ACYPI002944	uncharacterized protein
ACYPI002687-RA RefSeq transcript XM_001943677 PREDICTED: Acyrthosiphon pisum similar to synaptic vesicle protein (LOC100161467), mRNA	4.18139	1.31073e-05	ACYPI002687	synaptic vesicle protein
ACYPI009926-RA RefSeq transcript XM_001948253 PREDICTED: Acyrthosiphon pisum similar to RAS and EF-hand domain-containing protein homolog (LOC100169294), mRNA	4.17536	2.17982e-13	ACYPI009926
ACYPI52535-RA Glean transcript GLEAN_32535	4.17263	1.92313e-29
ACYPI23235-RA Glean transcript GLEAN_03235	4.16989	1.45411e-24	ACYPI23235	transient receptor potential channel pyrexia
ACYPI51811-RA Glean transcript GLEAN_31811	4.16741	3.32951e-19	ACYPI002633	cationic amino acid transporter
ACYPI009326-RA RefSeq transcript XM_001952392 PREDICTED: Acyrthosiphon pisum similar to glutathione S-transferase-like protein (LOC100168645), mRNA	4.16389	2.86461e-18	ACYPI009326	Glutathione S-transferase
ACYPI006979-RA RefSeq transcript XM_001946782 PREDICTED: Acyrthosiphon pisum similar to CG4562 CG4562-PA (LOC100166076), mRNA	4.14561	2.0809e-09	ACYPI006979	multidrug resistance protein 2 atp-binding cassette protein c
ACYPI31408-RA Glean transcript GLEAN_11408	4.14551	3.18425e-18	ACYPI31408	AGAP007028-PA
ACYPI53847-RA Glean transcript GLEAN_33847	4.13776	5.87566e-20	ACYPI53847
ACYPI004687-RA RefSeq transcript XM_001952525 PREDICTED: Acyrthosiphon pisum similar to AGAP000801-PA (LOC100163612), partial mRNA	4.13319	5.80775e-11	ACYPI004687
ACYPI30119-RA Glean transcript GLEAN_10119	4.13243	2.7471e-20
ACYPI004036-RA RefSeq transcript XM_001949273 PREDICTED: Acyrthosiphon pisum similar to ZC416.1 (LOC100162917), mRNA	4.1318	6.03854e-13	ACYPI004036	ZC416.1
ACYPI45690-RA Glean transcript GLEAN_25690	4.10676	4.51781e-19	ACYPI45690
ACYPI009919-RA RefSeq transcript XM_001944751 PREDICTED: Acyrthosiphon pisum hypothetical protein LOC100169287 (LOC100169287), mRNA	4.10634	9.75581e-11	ACYPI009919
ACYPI008225-RA RefSeq transcript XM_001951645 PREDICTED: Acyrthosiphon pisum similar to nicotinic acetylcholine receptor beta 1 subunit, transcript variant 1 (LOC100167428), mRNA	4.10233	1.73554e-22	ACYPI008225	Acetylcholine receptor subunit beta-like 1
ACYPI43831-RA Glean transcript GLEAN_23831	4.10029	5.00939e-25
ACYPI002030-RA RefSeq transcript XM_001945553 PREDICTED: Acyrthosiphon pisum hypothetical protein LOC100160759 (LOC100160759), mRNA	4.09968	7.7962e-14
ACYPI005577-RB RefSeq transcript XM_001947997 PREDICTED: Acyrthosiphon pisum similar to conserved hypothetical protein, transcript variant 2 (LOC100164577), mRNA	4.09685	4.39744e-13	ACYPI005577
ACYPI003955-RA RefSeq transcript XM_001947847 PREDICTED: Acyrthosiphon pisum similar to OV-16 antigen (LOC100162832), mRNA	4.08007	4.49245e-11	ACYPI003955	OV-16 antigen
ACYPI47290-RA Glean transcript GLEAN_27290	4.07996	1.47603e-20	ACYPI47290
ACYPI38850-RA Glean transcript GLEAN_18850	4.071	1.48425e-17	ACYPI38850
ACYPI000535-RA RefSeq transcript XM_001943143 PREDICTED: Acyrthosiphon pisum similar to AGAP010241-PA (LOC100159137), partial mRNA	4.06782	4.71463e-13	ACYPI005837
ACYPI006200-RA RefSeq transcript XM_001943595 PREDICTED: Acyrthosiphon pisum similar to cytochrome P450 CYP6AX1 protein (LOC100165240), mRNA	4.06352	4.04904e-16	ACYPI006200
ACYPI005577-RA RefSeq transcript XM_001947948 PREDICTED: Acyrthosiphon pisum similar to conserved hypothetical protein, transcript variant 1 (LOC100164577), mRNA	4.06043	5.10887e-16	ACYPI005577
ACYPI002439-RA RefSeq transcript XM_001948769 PREDICTED: Acyrthosiphon pisum similar to Os03g0358100 (LOC100161198), mRNA	4.04959	7.75323e-09	ACYPI002439	Glutathione peroxidase
ACYPI32235-RA Glean transcript GLEAN_12235	4.04924	8.02392e-19	ACYPI32235
ACYPI005134-RA RefSeq transcript XM_001949245 PREDICTED: Acyrthosiphon pisum similar to Acid phosphatase 1 CG7899-PA (LOC100164093), mRNA	4.04818	8.1868e-10	ACYPI005134
ACYPI000436-RA RefSeq transcript XM_001944460 PREDICTED: Acyrthosiphon pisum similar to GA19464-PA (LOC100159025), mRNA	4.04	3.46151e-06	ACYPI000436
ACYPI007553-RB RefSeq transcript XM_001949125 PREDICTED: Acyrthosiphon pisum hypothetical protein LOC100166702, transcript variant 2 (LOC100166702), mRNA	4.03518	6.44393e-14	ACYPI081014
ACYPI006100-RA RefSeq transcript XM_001946880 PREDICTED: Acyrthosiphon pisum hypothetical protein LOC100165137 (LOC100165137), mRNA	4.03404	3.52118e-13	ACYPI006100
ACYPI002511-RA RefSeq transcript XM_001945238 PREDICTED: Acyrthosiphon pisum similar to CG6329 CG6329-PC (LOC100161277), mRNA	4.03403	6.77109e-13	ACYPI002511	uncharacterized protein
ACYPI56141-RA Glean transcript GLEAN_36141	4.02408	1.93799e-29	ACYPI005351	uncharacterized protein
ACYPI001502-RA RefSeq transcript XM_001946211 PREDICTED: Acyrthosiphon pisum similar to n-myc downstream regulated (LOC100160187), mRNA	4.01293	6.34079e-21	ACYPI001502
ACYPI000422-RA RefSeq transcript XM_001949184 PREDICTED: Acyrthosiphon pisum similar to apolipophorins (LOC100159010), mRNA	4.01171	2.27496e-13	ACYPI000422	uncharacterized protein
ACYPI33743-RA Glean transcript GLEAN_13743	4.0069	2.20458e-23	ACYPI33743	uncharacterized protein
ACYPI35440-RA Glean transcript GLEAN_15440	4.00336	3.51832e-20	ACYPI35440	GH19182p
ACYPI31490-RA Glean transcript GLEAN_11490	3.99719	2.26277e-23
ACYPI21355-RA Glean transcript GLEAN_01355	3.99501	6.98718e-22	ACYPI21355
ACYPI001193-RA RefSeq transcript XM_001943392 PREDICTED: Acyrthosiphon pisum similar to CG30387 CG30387-PC (LOC100159852), mRNA	3.98681	1.30926e-11	ACYPI001193
ACYPI26066-RA Glean transcript GLEAN_06066	3.98607	1.13292e-17
ACYPI006082-RA RefSeq transcript XM_001944822 PREDICTED: Acyrthosiphon pisum similar to CG13124 CG13124-PA (LOC100165116), mRNA	3.9834	2.24752e-15	ACYPI006082	uncharacterized protein
ACYPI005837-RA RefSeq transcript XM_001946223 PREDICTED: Acyrthosiphon pisum similar to gamma-glutamyltranspeptidase 1 (LOC100164852), partial mRNA	3.97865	8.19291e-13	ACYPI005837
ACYPI006427-RA RefSeq transcript XM_001950656 PREDICTED: Acyrthosiphon pisum similar to AGAP007628-PA (LOC100165476), partial mRNA	3.97392	1.33923e-13	ACYPI006427	hypothetical protein
ACYPI46778-RA Glean transcript GLEAN_26778	3.96561	5.18668e-27	ACYPI46778
ACYPI23752-RA Glean transcript GLEAN_03752	3.95963	5.99879e-13	ACYPI23752
ACYPI40990-RA Glean transcript GLEAN_20990	3.95845	2.93906e-18	ACYPI40990	uncharacterized protein
ACYPI008303-RA RefSeq transcript XM_001946834 PREDICTED: Acyrthosiphon pisum similar to sodium/solute symporter (LOC100167509), mRNA	3.95808	8.50879e-11	ACYPI008303	Sodium-coupled monocarboxylate transporter 1
ACYPI003310-RA RefSeq transcript XM_001949624 PREDICTED: Acyrthosiphon pisum similar to sucrase (LOC100162137), partial mRNA	3.95789	2.73534e-11	ACYPI003310
ACYPI001728-RA RefSeq transcript XM_001946912 PREDICTED: Acyrthosiphon pisum hypothetical protein LOC100160431 (LOC100160431), partial mRNA	3.95321	1.2878e-08	ACYPI001728
ACYPI006475-RA RefSeq transcript XM_001950143 PREDICTED: Acyrthosiphon pisum similar to sodium/potassium-dependent atpase beta-2 subunit (LOC100165533), mRNA	3.95207	4.16187e-18	ACYPI006475	Sodium/potassium-transporting ATPase subunit beta-2
ACYPI007746-RA RefSeq transcript XM_001945381 PREDICTED: Acyrthosiphon pisum similar to juvenile hormone-inducible protein 26 (LOC100166909), mRNA	3.94163	9.91541e-20	ACYPI007746	juvenile hormone-inducible protein
ACYPI20953-RA Glean transcript GLEAN_00953	3.93903	1.64173e-12
ACYPI000707-RA RefSeq transcript XM_001950688 PREDICTED: Acyrthosiphon pisum similar to Ofd1 protein, putative (LOC100159324), mRNA	3.9369	7.38373e-10	ACYPI000707
ACYPI001747-RA RefSeq transcript XM_001952784 PREDICTED: Acyrthosiphon pisum similar to CG32158 CG32158-PG (LOC100160451), mRNA	3.93545	0.00233305	ACYPI001747
ACYPI005779-RA RefSeq transcript XM_001943036 PREDICTED: Acyrthosiphon pisum similar to tan CG12120-PA (LOC100164792), mRNA	3.92594	4.73852e-13	ACYPI005779
ACYPI005884-RA RefSeq transcript XM_001952195 PREDICTED: Acyrthosiphon pisum similar to AGAP005794-PA (LOC100164904), mRNA	3.90427	2.14273e-14	ACYPI005884
ACYPI28150-RA Glean transcript GLEAN_08150	3.90426	5.12511e-16
ACYPI008617-RA RefSeq transcript XM_001948323 PREDICTED: Acyrthosiphon pisum hypothetical protein LOC100167863 (LOC100167863), mRNA	3.8625	6.85171e-25	ACYPI008617
ACYPI000671-RA RefSeq transcript XM_001946104 PREDICTED: Acyrthosiphon pisum similar to AGAP000383-PA (LOC100159283), partial mRNA	3.8442	3.50372e-05	ACYPI081212	g-protein coupled receptor
ACYPI002077-RA RefSeq transcript XM_001950404 PREDICTED: Acyrthosiphon pisum hypothetical protein LOC100160806 (LOC100160806), mRNA	3.84327	1.36404e-13	ACYPI002077	uncharacterized protein
ACYPI006468-RA RefSeq transcript XM_001942519 PREDICTED: Acyrthosiphon pisum similar to inositol polyphosphate 1-phosphatase (LOC100165524), partial mRNA	3.84212	8.25976e-15	ACYPI003823	Inositol polyphosphate 1-phosphatase
ACYPI000768-RA RefSeq transcript XM_001943282 PREDICTED: Acyrthosiphon pisum similar to GA13362-PA (LOC100159394), mRNA	3.82306	2.75515e-13	ACYPI000768	Maltase 1
ACYPI008723-RA RefSeq transcript XM_001949186 PREDICTED: Acyrthosiphon pisum similar to homeobox protein (LOC100167981), mRNA	3.81462	5.36357e-20	ACYPI008723
ACYPI000744-RA RefSeq transcript XM_001946062 PREDICTED: Acyrthosiphon pisum similar to dpr12 CG34385-PB (LOC100159367), mRNA	3.8034	6.41492e-08	ACYPI000744	uncharacterized protein
ACYPI007359-RA RefSeq transcript XM_001945236 PREDICTED: Acyrthosiphon pisum similar to beat protein (LOC100166492), partial mRNA	3.79777	1.46854e-13	ACYPI007359
ACYPI002942-RA RefSeq transcript XM_001947007 PREDICTED: Acyrthosiphon pisum hypothetical protein LOC100161742 (LOC100161742), mRNA	3.79377	9.0708e-14	ACYPI002942
ACYPI38254-RA Glean transcript GLEAN_18254	3.79137	1.15839e-20
ACYPI31047-RA Glean transcript GLEAN_11047	3.78993	6.33936e-20	ACYPI31047	lipoma hmgic fusion partner precursor
ACYPI006270-RA RefSeq transcript XM_001944992 PREDICTED: Acyrthosiphon pisum similar to conserved hypothetical protein (LOC100165313), partial mRNA	3.78419	2.70943e-06	ACYPI006270	uncharacterized protein
ACYPI25101-RA Glean transcript GLEAN_05101	3.78154	6.96094e-13
ACYPI010204-RA RefSeq transcript XM_001943750 PREDICTED: Acyrthosiphon pisum similar to glucosyl/glucuronosyl transferases (LOC100169601), mRNA	3.78142	4.35955e-24	ACYPI010204	glucosyl/glucuronosyl transferases
ACYPI27398-RA Glean transcript GLEAN_07398	3.77871	1.75082e-17
ACYPI54756-RA Glean transcript GLEAN_34756	3.77555	8.83642e-22	ACYPI54756
ACYPI002829-RA RefSeq transcript XM_001944931 PREDICTED: Acyrthosiphon pisum similar to AGAP007615-PA (LOC100161620), mRNA	3.77445	0.000352781	ACYPI002829
ACYPI004591-RA RefSeq transcript XM_001948582 PREDICTED: Acyrthosiphon pisum hypothetical protein LOC100163506 (LOC100163506), mRNA	3.77345	5.44368e-12	ACYPI004591	uncharacterized protein
ACYPI006017-RA RefSeq transcript XM_001945066 PREDICTED: Acyrthosiphon pisum hypothetical protein LOC100165045 (LOC100165045), mRNA	3.77237	9.42998e-17	ACYPI006017	uncharacterized protein
ACYPI009429-RA RefSeq transcript XM_001945275 PREDICTED: Acyrthosiphon pisum hypothetical protein LOC100168754 (LOC100168754), mRNA	3.76931	3.88495e-23	ACYPI080708	uncharacterized protein
ACYPI004533-RA RefSeq transcript XM_001948926 PREDICTED: Acyrthosiphon pisum similar to canalicular multispecific organic anion transporter 1 (LOC100163444), mRNA	3.76864	1.0904e-17	ACYPI004533	multidrug resistance protein 2 atp-binding cassette protein c
ACYPI36617-RA Glean transcript GLEAN_16617	3.76278	2.95033e-24	ACYPI36617	uncharacterized protein
ACYPI009626-RA RefSeq transcript XM_001950520 PREDICTED: Acyrthosiphon pisum similar to dopa decarboxylase (LOC100168964), mRNA	3.75896	5.22331e-18	ACYPI009626	Aromatic-L-amino-acid decarboxylase
ACYPI003334-RA RefSeq transcript XM_001949985 PREDICTED: Acyrthosiphon pisum similar to rhomboid (LOC100162164), mRNA	3.75873	4.10207e-06
ACYPI53004-RA Glean transcript GLEAN_33004	3.74122	3.8591e-22	ACYPI53004
ACYPI001361-RA RefSeq transcript XM_001945243 PREDICTED: Acyrthosiphon pisum similar to calcitonin receptor (LOC100160028), partial mRNA	3.73639	4.09629e-13	ACYPI001361
ACYPI29520-RA Glean transcript GLEAN_09520	3.72231	1.23166e-15	ACYPI29520
ACYPI002025-RA RefSeq transcript XM_001949007 PREDICTED: Acyrthosiphon pisum similar to CG31751 CG31751-PA (LOC100160754), mRNA	3.71977	2.78367e-07	ACYPI002025	uncharacterized protein
ACYPI007114-RA RefSeq transcript XM_001944091 PREDICTED: Acyrthosiphon pisum hypothetical protein LOC100166225 (LOC100166225), mRNA	3.71942	2.54938e-19	ACYPI005779
ACYPI002788-RA RefSeq transcript XM_001949928 PREDICTED: Acyrthosiphon pisum similar to Pupal cuticle protein C1B (TM-C1B) (TM-PCP C1B) (LOC100161576), mRNA	3.71899	4.69916e-10	ACYPI002788	Pupal cuticle protein C1B (TM-C1B) (TM-PCP C1B)
ACYPI41476-RA Glean transcript GLEAN_21476	3.70342	8.85895e-20	ACYPI41476	uncharacterized protein
ACYPI007076-RA RefSeq transcript XM_001948729 PREDICTED: Acyrthosiphon pisum similar to Stretchin-Mlck CG18255-PA (LOC100166183), mRNA	3.70257	2.00934e-10	ACYPI007076
ACYPI004674-RA RefSeq transcript XM_001946922 PREDICTED: Acyrthosiphon pisum similar to arrestin1 (LOC100163599), mRNA	3.69948	2.03582e-11	ACYPI004674	Beta-arrestin-1
ACYPI004364-RA RefSeq transcript XM_001947424 PREDICTED: Acyrthosiphon pisum similar to conserved hypothetical protein (LOC100163267), mRNA	3.69453	0.00130663	ACYPI004364
ACYPI006021-RA RefSeq transcript XM_001944575 PREDICTED: Acyrthosiphon pisum similar to endothelin-converting enzyme (LOC100165050), mRNA	3.67641	4.86548e-17	ACYPI006021
ACYPI26537-RA Glean transcript GLEAN_06537	3.67612	2.46336e-19	ACYPI072951	carbonic anhydrase
ACYPI000665-RA RefSeq transcript XM_001947454 PREDICTED: Acyrthosiphon pisum similar to CG7470 CG7470-PA (LOC100159277), mRNA	3.66173	1.07095e-12	ACYPI000665	delta synthetase
ACYPI001079-RA RefSeq transcript XM_001952214 PREDICTED: Acyrthosiphon pisum similar to mXr CG30361-PA (LOC100159730), partial mRNA	3.65435	9.73585e-10	ACYPI001079
ACYPI002011-RA RefSeq transcript XM_001944517 PREDICTED: Acyrthosiphon pisum similar to tentative cuticle protein (LOC100160737), mRNA	3.65306	2.95501e-06	ACYPI082258
ACYPI005154-RA RefSeq transcript XM_001943173 PREDICTED: Acyrthosiphon pisum similar to tentative cuticle protein (LOC100164113), mRNA	3.65204	1.18676e-16	ACYPI089152
ACYPI007307-RA RefSeq transcript XM_001944156 PREDICTED: Acyrthosiphon pisum similar to GA19046-PA (LOC100166435), mRNA	3.6494	1.69275e-13	ACYPI007307	Potassium-transporting ATPase alpha chain 2
ACYPI45293-RA Glean transcript GLEAN_25293	3.64787	8.56661e-23
ACYPI000097-RA RefSeq transcript NM_001126180 gi|187125205|ref|NM_001126180.1 Acyrthosiphon pisum chemosensory protein-like (LOC100145855), mRNA	3.64664	7.15722e-15	ACYPI000097
ACYPI005818-RB RefSeq transcript XM_001950824 PREDICTED: Acyrthosiphon pisum hypothetical protein LOC100164831, transcript variant 2 (LOC100164831), mRNA	3.64374	4.26269e-17
ACYPI31589-RA Glean transcript GLEAN_11589	3.63065	3.66781e-23	ACYPI31589	chorion peroxidase precursor
ACYPI010150-RA RefSeq transcript XM_001944251 PREDICTED: Acyrthosiphon pisum similar to CG31445 CG31445-PA (LOC100169540), partial mRNA	3.62531	8.53982e-14	ACYPI010150	Aminopeptidase N
ACYPI000001-RA RefSeq transcript NM_001126134 gi|187179336|ref|NM_001126134.1 Acyrthosiphon pisum membrane alanyl aminopeptidase N (LOC100144773), mRNA	3.62251	0.000130159	ACYPI000001	Aminopeptidase N-like protein
ACYPI003678-RA RefSeq transcript XM_001952215 PREDICTED: Acyrthosiphon pisum similar to internalin A, putative (LOC100162529), mRNA	3.61834	1.11141e-12	ACYPI003678
ACYPI007284-RA RefSeq transcript XM_001948780 PREDICTED: Acyrthosiphon pisum similar to zinc finger protein, putative (LOC100166409), mRNA	3.61699	8.73887e-13	ACYPI007284
ACYPI009543-RA RefSeq transcript XM_001942923 PREDICTED: Acyrthosiphon pisum similar to tan CG12120-PA (LOC100168878), mRNA	3.61397	4.93428e-18	ACYPI009543
ACYPI31990-RA Glean transcript GLEAN_11990	3.6137	3.76087e-21	ACYPI49406
ACYPI009293-RA RefSeq transcript XM_001948086 PREDICTED: Acyrthosiphon pisum similar to AGAP009284-PA (LOC100168610), mRNA	3.61256	1.80701e-13	ACYPI009293
ACYPI002002-RA RefSeq transcript XM_001947819 PREDICTED: Acyrthosiphon pisum hypothetical protein LOC100160727 (LOC100160727), mRNA	3.6091	0.0202365	ACYPI002002	uncharacterized protein
ACYPI24315-RA Glean transcript GLEAN_04315	3.60892	9.00148e-13
ACYPI001710-RA RefSeq transcript XM_001945095 PREDICTED: Acyrthosiphon pisum similar to four and a half lim domains (LOC100160412), mRNA	3.60695	1.33921e-09	ACYPI001710
ACYPI48357-RA Glean transcript GLEAN_28357	3.60257	7.92899e-22	ACYPI48357	uncharacterized protein
ACYPI20281-RA Glean transcript GLEAN_00281	3.60031	8.17988e-14	ACYPI20281
ACYPI004837-RA RefSeq transcript XM_001949685 PREDICTED: Acyrthosiphon pisum similar to putative secreted salivary peptide (LOC100163777), partial mRNA	3.59968	5.77507e-08	ACYPI004837	uncharacterized protein
ACYPI43825-RA Glean transcript GLEAN_23825	3.59839	3.79146e-23
ACYPI008589-RA RefSeq transcript XM_001942898 PREDICTED: Acyrthosiphon pisum similar to n-acetylgalactosaminyltransferase (LOC100167831), mRNA	3.59375	5.68655e-16	ACYPI008589	pgant4
ACYPI31144-RA Glean transcript GLEAN_11144	3.59185	1.55686e-23	ACYPI007076
ACYPI002209-RA RefSeq transcript XM_001943516 PREDICTED: Acyrthosiphon pisum similar to dynamin (LOC100160943), mRNA	3.59114	5.12142e-15	ACYPI002209
ACYPI008036-RA RefSeq transcript XM_001943359 PREDICTED: Acyrthosiphon pisum hypothetical protein LOC100167225 (LOC100167225), mRNA	3.58029	3.33635e-08
ACYPI005156-RA RefSeq transcript XM_001948448 PREDICTED: Acyrthosiphon pisum similar to slimfast CG11128-PC (LOC100164115), mRNA	3.57897	4.41599e-12	ACYPI005156	cationic amino acid transporter
ACYPI31558-RA Glean transcript GLEAN_11558	3.55322	4.46277e-24	ACYPI31558
ACYPI47730-RA Glean transcript GLEAN_27730	3.54752	7.2013e-18
ACYPI55001-RA Glean transcript GLEAN_35001	3.54179	1.56517e-29
ACYPI29548-RA Glean transcript GLEAN_09548	3.54039	3.48173e-15	ACYPI29548
ACYPI005620-RA RefSeq transcript XM_001950500 PREDICTED: Acyrthosiphon pisum similar to glutathione S-transferase (LOC100164626), mRNA	3.53389	8.87712e-19	ACYPI005620
ACYPI001446-RA RefSeq transcript XM_001952568 PREDICTED: Acyrthosiphon pisum similar to sarcalumenin (LOC100160121), mRNA	3.53345	7.8644e-09	ACYPI001446
ACYPI007899-RA RefSeq transcript XM_001943320 PREDICTED: Acyrthosiphon pisum similar to IP17434p (LOC100167076), mRNA	3.53015	0.000743886	ACYPI007899	Alkaline phosphatase
ACYPI009222-RA RefSeq transcript XM_001948193 PREDICTED: Acyrthosiphon pisum similar to glucosyl/glucuronosyl transferases (LOC100168531), mRNA	3.52461	3.83013e-19	ACYPI009222
ACYPI001436-RA RefSeq transcript XM_001952128 PREDICTED: Acyrthosiphon pisum similar to sucrase (LOC100160111), mRNA	3.52229	7.61372e-07	ACYPI007467	Maltase 1
ACYPI004463-RA RefSeq transcript XM_001950210 PREDICTED: Acyrthosiphon pisum similar to AGAP003204-PA (LOC100163370), mRNA	3.51806	1.04694e-14	ACYPI004463	GD25663
ACYPI21413-RA Glean transcript GLEAN_01413	3.5151	7.85698e-15	ACYPI21413
ACYPI001709-RA RefSeq transcript XM_001946474 PREDICTED: Acyrthosiphon pisum similar to AGAP012154-PA (LOC100160411), mRNA	3.51063	8.39904e-08	ACYPI001709	BcDNA.GH06717
ACYPI007165-RA RefSeq transcript XM_001946263 PREDICTED: Acyrthosiphon pisum similar to GA13626-PA (LOC100166282), mRNA	3.50956	1.85052e-11	ACYPI007165	Partner of bursicon
ACYPI007370-RA RefSeq transcript XM_001947291 PREDICTED: Acyrthosiphon pisum similar to apyrase (LOC100166504), partial mRNA	3.50813	1.85725e-08	ACYPI007370	CG5276 protein
ACYPI53684-RA Glean transcript GLEAN_33684	3.50443	5.96763e-26
ACYPI008843-RA RefSeq transcript XM_001948453 PREDICTED: Acyrthosiphon pisum similar to cytochrome P450 CYP6AX1 protein (LOC100168115), mRNA	3.50057	4.58796e-19	ACYPI008843
ACYPI002976-RA RefSeq transcript XM_001948043 PREDICTED: Acyrthosiphon pisum similar to tetraspanin (LOC100161779), mRNA	3.5004	4.11867e-09	ACYPI002976	Tetraspanin
ACYPI000830-RA RefSeq transcript XM_001950343 PREDICTED: Acyrthosiphon pisum similar to chromaffin granule amine transporter (LOC100159461), mRNA	3.50017	0.000157045	ACYPI000830
ACYPI003601-RA RefSeq transcript XM_001950596 PREDICTED: Acyrthosiphon pisum similar to CG4090 CG4090-PA (LOC100162450), mRNA	3.49971	2.58026e-13	ACYPI003601	uncharacterized protein
ACYPI000270-RA RefSeq transcript XM_001950433 PREDICTED: Acyrthosiphon pisum similar to carboxylesterase; esterase FE4 (LOC100158848), partial mRNA	3.4941	4.96625e-07	ACYPI000270	Esterase FE4
ACYPI000531-RA RefSeq transcript XM_001942978 PREDICTED: Acyrthosiphon pisum similar to CG7759 CG7759-PA (LOC100159133), mRNA	3.48354	8.48488e-08	ACYPI000531
ACYPI010088-RA RefSeq transcript XM_001948181 PREDICTED: Acyrthosiphon pisum similar to Pupal cuticle protein C1B (TM-C1B) (TM-PCP C1B) (LOC100169473), mRNA	3.48197	3.69571e-20	ACYPI010088
ACYPI000223-RA RefSeq transcript XM_001948239 PREDICTED: Acyrthosiphon pisum hypothetical protein LOC100158789 (LOC100158789), mRNA	3.47646	8.19054e-11
ACYPI38253-RA Glean transcript GLEAN_18253	3.4688	2.23051e-18	ACYPI38253	replication protein A 70 kDa DNA-binding subunit-like
ACYPI26400-RA Glean transcript GLEAN_06400	3.46879	2.49774e-25	ACYPI26400
ACYPI009245-RA RefSeq transcript XM_001951527 PREDICTED: Acyrthosiphon pisum similar to GA20813-PA (LOC100168555), mRNA	3.46302	1.56467e-21	ACYPI009245
ACYPI003128-RA RefSeq transcript XM_001943089 PREDICTED: Acyrthosiphon pisum similar to esterase D/formylglutathione hydrolase (LOC100161942), mRNA	3.46191	1.45614e-06	ACYPI003128
ACYPI24207-RA Glean transcript GLEAN_04207	3.46155	3.60635e-23
ACYPI003268-RA RefSeq transcript XM_001943846 PREDICTED: Acyrthosiphon pisum similar to AGAP005784-PA (LOC100162090), mRNA	3.45725	4.82064e-15	ACYPI003268
ACYPI009351-RA RefSeq transcript XM_001952563 PREDICTED: Acyrthosiphon pisum similar to trehalase (LOC100168671), mRNA	3.45537	1.01844e-13	ACYPI009351	Trehalase
ACYPI50685-RA Glean transcript GLEAN_30685	3.45081	1.61274e-26	ACYPI50685
ACYPI004200-RA RefSeq transcript XM_001952588 PREDICTED: Acyrthosiphon pisum similar to carbohydrate kinase-like (LOC100163090), mRNA	3.44935	6.89987e-11	ACYPI004200	carbohydrate kinase-like
ACYPI008130-RA RefSeq transcript XM_001944808 PREDICTED: Acyrthosiphon pisum similar to glucosyl/glucuronosyl transferases (LOC100167326), mRNA	3.44793	6.97828e-19	ACYPI008130	AGAP007028-PA
ACYPI006824-RA RefSeq transcript XM_001950726 PREDICTED: Acyrthosiphon pisum similar to abc transporter (LOC100165910), partial mRNA	3.44482	1.78738e-11	ACYPI006824
ACYPI006328-RA RefSeq transcript XM_001945945 PREDICTED: Acyrthosiphon pisum similar to beta-1,4-galactosyltransferase (LOC100165374), mRNA	3.44337	3.17752e-15	ACYPI006328
ACYPI000292-RA RefSeq transcript XM_001943439 PREDICTED: Acyrthosiphon pisum similar to AGAP007237-PA (LOC100158871), partial mRNA	3.43628	1.65331e-09
ACYPI007077-RA RefSeq transcript XM_001945368 PREDICTED: Acyrthosiphon pisum similar to solute carrier family 23 member 2 (LOC100166184), partial mRNA	3.43499	7.00409e-16	ACYPI007077	Solute carrier family 23 member 2
ACYPI30113-RA Glean transcript GLEAN_10113	3.43209	1.56618e-17
ACYPI000778-RA RefSeq transcript XM_001946714 PREDICTED: Acyrthosiphon pisum similar to katanin p60 subunit A-like 2 (LOC100159405), mRNA	3.42567	3.24137e-05	ACYPI000778
ACYPI47975-RA Glean transcript GLEAN_27975	3.40412	1.38205e-19	ACYPI47975	uncharacterized protein
ACYPI007906-RA RefSeq transcript XM_001943496 PREDICTED: Acyrthosiphon pisum similar to Mitochondrial sodium/hydrogen exchanger NHA2 (Mitochondrial Na(+)/H(+) exchanger NHA2) (Sodium/hydrogen exchanger-like domain-containing protein 2) (Na(+)/H(+) exchanger-like domain-containing protein 2) (NHE domain-containing protein 2)... (LOC100167085), mRNA	3.4017	1.09954e-21	ACYPI007906
ACYPI005992-RA RefSeq transcript XM_001943408 PREDICTED: Acyrthosiphon pisum similar to calbindin-32 (LOC100165018), mRNA	3.39712	5.10196e-12	ACYPI005992	calbindin-32
ACYPI006988-RA RefSeq transcript XM_001946983 PREDICTED: Acyrthosiphon pisum similar to CG16857 CG16857-PA (LOC100166087), mRNA	3.39702	2.26618e-11	ACYPI006988	CG16857
ACYPI26943-RA Glean transcript GLEAN_06943	3.38972	3.94992e-19	ACYPI26943	uncharacterized protein
ACYPI26003-RA Glean transcript GLEAN_06003	3.38907	5.17654e-25	ACYPI26003	Tigger transposable element-derived protein 4
ACYPI20759-RA Glean transcript GLEAN_00759	3.37629	1.18905e-15	ACYPI20759	Inhibin beta chain
ACYPI32439-RA Glean transcript GLEAN_12439	3.37519	1.27354e-24
ACYPI009858-RA RefSeq transcript XM_001946870 PREDICTED: Acyrthosiphon pisum similar to alpha1,6-fucosyltransferase CG2448-PA (LOC100169218), mRNA	3.37348	7.53633e-21	ACYPI009858
ACYPI43454-RA Glean transcript GLEAN_23454	3.36857	5.23286e-28	ACYPI43454	uncharacterized protein
ACYPI001516-RA RefSeq transcript XM_001950044 PREDICTED: Acyrthosiphon pisum similar to alpha6-fucosyltransferase, putative (LOC100160201), mRNA	3.36589	3.83072e-10	ACYPI001516
ACYPI003802-RA RefSeq transcript XM_001947515 PREDICTED: Acyrthosiphon pisum similar to formin 3 CG33556-PB (LOC100162660), mRNA	3.36491	9.50358e-10	ACYPI003802	FH2 domain-containing protein 1
ACYPI007956-RA RefSeq transcript XM_001944592 PREDICTED: Acyrthosiphon pisum similar to chromaffin granule amine transporter (LOC100167139), mRNA	3.35483	0.000125772
ACYPI33180-RA Glean transcript GLEAN_13180	3.34989	3.9954e-27	ACYPI33180
ACYPI000366-RA RefSeq transcript XM_001948359 PREDICTED: Acyrthosiphon pisum similar to 2-oxoglutarate carrier protein (LOC100158949), mRNA	3.34985	1.59271e-09	ACYPI000366	Mitochondrial 2-oxoglutarate/malate carrier protein
ACYPI000794-RA RefSeq transcript XM_001952064 PREDICTED: Acyrthosiphon pisum similar to glutathione S-transferase-like protein (LOC100159421), mRNA	3.34887	0.00514446	ACYPI000794
ACYPI004896-RA RefSeq transcript XM_001946175 PREDICTED: Acyrthosiphon pisum similar to arylsulfatase b (LOC100163840), partial mRNA	3.34389	0.00812617	ACYPI004896
ACYPI009111-RA RefSeq transcript XM_001948819 PREDICTED: Acyrthosiphon pisum hypothetical protein LOC100168407 (LOC100168407), mRNA	3.33465	1.81728e-13	ACYPI009111	uncharacterized protein
ACYPI005263-RA RefSeq transcript XM_001947218 PREDICTED: Acyrthosiphon pisum similar to CG3630 CG3630-PA (LOC100164229), mRNA	3.32728	9.37766e-20	ACYPI005263
ACYPI007341-RA RefSeq transcript XM_001951114 PREDICTED: Acyrthosiphon pisum similar to cysteine dioxygenase (LOC100166473), mRNA	3.32527	8.2194e-18	ACYPI007341	Cysteine dioxygenase type 1
ACYPI000852-RA RefSeq transcript XM_001944549 PREDICTED: Acyrthosiphon pisum hypothetical protein LOC100159485 (LOC100159485), mRNA	3.32222	3.29732e-13	ACYPI000852
ACYPI008423-RA RefSeq transcript XM_001946009 PREDICTED: Acyrthosiphon pisum hypothetical protein LOC100167646 (LOC100167646), mRNA	3.3164	3.59788e-19	ACYPI008423	uncharacterized protein
ACYPI004371-RA RefSeq transcript XM_001950407 PREDICTED: Acyrthosiphon pisum similar to AGAP002350-PC (LOC100163274), mRNA	3.30849	3.45575e-06	ACYPI004371
ACYPI000491-RA RefSeq transcript XM_001947264 PREDICTED: Acyrthosiphon pisum similar to DHFR-coamplified protein (LOC100159088), mRNA	3.30586	0.00011042	ACYPI000491	gtp-binding nuclear protein ran1
ACYPI009946-RA RefSeq transcript XM_001949898 PREDICTED: Acyrthosiphon pisum hypothetical protein LOC100169317 (LOC100169317), mRNA	3.29631	2.00704e-12	ACYPI087730	uncharacterized protein
ACYPI007673-RA RefSeq transcript XM_001948990 PREDICTED: Acyrthosiphon pisum similar to GA18098-PA (LOC100166833), partial mRNA	3.29264	1.46284e-20	ACYPI007673
ACYPI20952-RA Glean transcript GLEAN_00952	3.28881	1.13927e-24	ACYPI20952
ACYPI009881-RA RefSeq transcript XM_001943863 PREDICTED: Acyrthosiphon pisum hypothetical protein LOC100169243 (LOC100169243), mRNA	3.28651	8.43473e-19	ACYPI009881	uncharacterized protein
ACYPI000732-RA RefSeq transcript XM_001947401 PREDICTED: Acyrthosiphon pisum similar to CG14935 CG14935-PB (LOC100159352), mRNA	3.27291	0.000175993
ACYPI002541-RA RefSeq transcript XM_001947236 PREDICTED: Acyrthosiphon pisum similar to Y51B11A.1 (LOC100161309), mRNA	3.2647	3.10891e-10	ACYPI002541	Y51B11A.1
ACYPI007467-RA RefSeq transcript XM_001945930 PREDICTED: Acyrthosiphon pisum similar to sucrase (LOC100166609), partial mRNA	3.26468	7.35806e-11	ACYPI007467	Maltase 1
ACYPI003147-RA RefSeq transcript XM_001952638 PREDICTED: Acyrthosiphon pisum similar to glucosyl/glucuronosyl transferases (LOC100161963), partial mRNA	3.25798	4.1763e-08	ACYPI39656
ACYPI001616-RA RefSeq transcript XM_001952762 PREDICTED: Acyrthosiphon pisum hypothetical protein LOC100160312 (LOC100160312), mRNA	3.2527	9.25861e-07	ACYPI001616
ACYPI003087-RA RefSeq transcript XM_001947158 PREDICTED: Acyrthosiphon pisum similar to calmodulin (LOC100161899), mRNA	3.25213	5.8158e-07	ACYPI003087	cam
ACYPI003231-RA RefSeq transcript XM_001944355 PREDICTED: Acyrthosiphon pisum similar to CG15786 CG15786-PA (LOC100162050), mRNA	3.24231	1.82752e-11	ACYPI003231	IP21342p
ACYPI010081-RA RefSeq transcript XM_001950527 PREDICTED: Acyrthosiphon pisum similar to cathepsin B-N (LOC100169466), mRNA	3.24097	4.61541e-22	ACYPI010081	Cathepsin B-S
ACYPI49270-RA Glean transcript GLEAN_29270	3.23333	2.14126e-30	ACYPI49270	keratin-associated protein
ACYPI005068-RA RefSeq transcript XM_001948277 PREDICTED: Acyrthosiphon pisum similar to AGAP011038-PA (LOC100164023), mRNA	3.23028	1.87614e-11	ACYPI005068	uncharacterized protein
ACYPI008515-RA RefSeq transcript XM_001943002 PREDICTED: Acyrthosiphon pisum similar to conserved hypothetical protein (LOC100167749), mRNA	3.21167	6.04804e-13	ACYPI008515
ACYPI001060-RA RefSeq transcript XM_001950317 PREDICTED: Acyrthosiphon pisum similar to Ring canal kelch protein (LOC100159710), mRNA	3.2103	4.87804e-12	ACYPI072098	Kelch-like protein 3
ACYPI22332-RA Glean transcript GLEAN_02332	3.20947	4.53835e-18	ACYPI22332	mitochondrial solute carrier protein
ACYPI46209-RA Glean transcript GLEAN_26209	3.2071	1.20286e-31	ACYPI46209	Reverse transcriptase
ACYPI53685-RA Glean transcript GLEAN_33685	3.19123	8.20645e-27	ACYPI53685	GA22519
ACYPI30207-RA Glean transcript GLEAN_10207	3.19117	2.54174e-19
ACYPI21557-RA Glean transcript GLEAN_01557	3.18179	3.93785e-16	ACYPI21557	Reverse transcriptase
ACYPI005055-RA RefSeq transcript XM_001952625 PREDICTED: Acyrthosiphon pisum similar to AGAP011815-PA (LOC100164008), mRNA	3.1802	4.31708e-13	ACYPI005055
ACYPI005006-RA RefSeq transcript XM_001945173 PREDICTED: Acyrthosiphon pisum similar to GA12151-PA (LOC100163958), partial mRNA	3.17733	7.05719e-12	ACYPI005006
ACYPI006250-RB RefSeq transcript XM_001948322 PREDICTED: Acyrthosiphon pisum similar to pupal cuticle protein 78E, putative, transcript variant 2 (LOC100165293), mRNA	3.17459	7.18384e-14
ACYPI34964-RA Glean transcript GLEAN_14964	3.16694	9.77754e-20	ACYPI34964	Guanylate cyclase
ACYPI56210-RA Glean transcript GLEAN_36210	3.15783	5.43438e-29
ACYPI20204-RA Glean transcript GLEAN_00204	3.15585	1.00582e-14	ACYPI20204
ACYPI001887-RA RefSeq transcript XM_001946443 PREDICTED: Acyrthosiphon pisum hypothetical protein LOC100160601 (LOC100160601), mRNA	3.14833	4.43148e-16	ACYPI001887
ACYPI52772-RA Glean transcript GLEAN_32772	3.13623	3.85646e-27	ACYPI52772
ACYPI003067-RA RefSeq transcript XM_001951800 PREDICTED: Acyrthosiphon pisum similar to carboxylesterase; esterase FE4 (LOC100161878), mRNA	3.12963	2.88855e-13	ACYPI003067	Esterase FE4
ACYPI009817-RA RefSeq transcript XM_001951309 PREDICTED: Acyrthosiphon pisum similar to AGAP011318-PA (LOC100169176), mRNA	3.12673	5.67345e-20	ACYPI009817
ACYPI010219-RA RefSeq transcript XM_001947627 PREDICTED: Acyrthosiphon pisum similar to serine 3-dehydrogenase (LOC100169616), mRNA	3.12621	4.06135e-17	ACYPI010219	antdh-PA
ACYPI41705-RA Glean transcript GLEAN_21705	3.12136	1.5082e-17
ACYPI007145-RA RefSeq transcript XM_001943562 PREDICTED: Acyrthosiphon pisum similar to carboxylesterase; esterase FE4 (LOC100166260), partial mRNA	3.11997	1.52222e-17	ACYPI009024
ACYPI006865-RA RefSeq transcript XM_001946178 PREDICTED: Acyrthosiphon pisum similar to AGAP007584-PA (LOC100165954), mRNA	3.11986	3.86689e-20	ACYPI006865
ACYPI001533-RA RefSeq transcript XM_001945897 PREDICTED: Acyrthosiphon pisum similar to Putative protein kinase C delta type homolog (LOC100160218), mRNA	3.11506	9.57833e-09
ACYPI000990-RA RefSeq transcript XM_001951948 PREDICTED: Acyrthosiphon pisum similar to cytochrome P450 CYP6AX1 protein (LOC100159636), mRNA	3.10626	2.44407e-07	ACYPI000990	Cytochrome P450 CYP6AX1 protein
ACYPI002298-RA RefSeq transcript XM_001950229 PREDICTED: Acyrthosiphon pisum similar to trehalase (LOC100161043), mRNA	3.10243	1.07111e-07	ACYPI002298
ACYPI46839-RA Glean transcript GLEAN_26839	3.10239	6.2242e-22	ACYPI46839	uncharacterized protein
ACYPI001926-RA RefSeq transcript XM_001950290 PREDICTED: Acyrthosiphon pisum similar to neurotransmitter gated ion channel (LOC100160642), mRNA	3.09666	2.95392e-07	ACYPI001926
ACYPI50214-RA Glean transcript GLEAN_30214	3.09382	1.19575e-21	ACYPI50214
ACYPI000537-RA RefSeq transcript XM_001943180 PREDICTED: Acyrthosiphon pisum similar to slimfast CG11128-PC (LOC100159139), mRNA	3.09152	3.49151e-16
ACYPI46913-RA Glean transcript GLEAN_26913	3.08882	1.51133e-24	ACYPI46913
ACYPI009585-RA RefSeq transcript XM_001950398 PREDICTED: Acyrthosiphon pisum hypothetical protein LOC100168922 (LOC100168922), mRNA	3.08842	5.44945e-13	ACYPI009585	uncharacterized protein
ACYPI001401-RA RefSeq transcript XM_001951820 PREDICTED: Acyrthosiphon pisum similar to chromaffin granule amine transporter (LOC100160073), mRNA	3.08344	5.80957e-07	ACYPI001401
ACYPI34227-RA Glean transcript GLEAN_14227	3.07379	2.11895e-18
ACYPI006645-RA RefSeq transcript XM_001948099 PREDICTED: Acyrthosiphon pisum similar to hCG1774522 (LOC100165716), mRNA	3.07372	2.64547e-14	ACYPI006645
ACYPI002724-RA RefSeq transcript XM_001942705 PREDICTED: Acyrthosiphon pisum similar to alpha-amylase (LOC100161507), mRNA	3.07339	5.29966e-14	ACYPI002724	Alpha-glucosidase
ACYPI006387-RA RefSeq transcript XM_001951960 PREDICTED: Acyrthosiphon pisum similar to aquaporin, transcript variant 1 (LOC100165436), mRNA	3.07337	7.31478e-17
ACYPI37467-RA Glean transcript GLEAN_17467	3.07306	1.75558e-21	ACYPI37467	Tigger transposable element-derived protein 4
ACYPI48083-RA Glean transcript GLEAN_28083	3.06819	2.11877e-32	ACYPI48083	hypothetical protein
ACYPI41375-RA Glean transcript GLEAN_21375	3.06692	5.14669e-24	ACYPI41375	uncharacterized protein
ACYPI002876-RA RefSeq transcript XM_001944259 PREDICTED: Acyrthosiphon pisum similar to salivary secreted protein (LOC100161673), mRNA	3.06204	1.87408e-05	ACYPI002876	secreted protein
ACYPI003220-RA RefSeq transcript XM_001944763 PREDICTED: Acyrthosiphon pisum similar to innexin (LOC100162039), mRNA	3.06027	0.000428411	ACYPI003220
ACYPI009042-RA RefSeq transcript XM_001951077 PREDICTED: Acyrthosiphon pisum similar to alpha-amylase (LOC100168332), mRNA	3.05859	1.8232e-15	ACYPI009042
ACYPI002703-RA RefSeq transcript XM_001947562 PREDICTED: Acyrthosiphon pisum hypothetical protein LOC100161484 (LOC100161484), mRNA	3.05411	1.26045e-07
ACYPI33493-RA Glean transcript GLEAN_13493	3.05153	8.99262e-15
ACYPI41893-RA Glean transcript GLEAN_21893	3.05118	1.31338e-26
ACYPI009772-RA RefSeq transcript XM_001943500 PREDICTED: Acyrthosiphon pisum similar to AGAP007300-PA (LOC100169125), mRNA	3.04497	5.11863e-16	ACYPI009772	Alkaline phosphatase
ACYPI008505-RA RefSeq transcript XM_001948113 PREDICTED: Acyrthosiphon pisum similar to parcas CG7761-PA (LOC100167738), partial mRNA	3.0438	2.55536e-11	ACYPI003486	sh3 domain-binding protein
ACYPI008351-RA RefSeq transcript XM_001951221 PREDICTED: Acyrthosiphon pisum similar to PC2-like prohormone convertase (LOC100167562), mRNA	3.02817	1.17649e-19	ACYPI008351
ACYPI003997-RA RefSeq transcript XM_001943474 PREDICTED: Acyrthosiphon pisum hypothetical protein LOC100162875 (LOC100162875), mRNA	3.02548	1.54353e-06	ACYPI003997
ACYPI45597-RA Glean transcript GLEAN_25597	3.01316	3.06199e-13	ACYPI45597
ACYPI006640-RA RefSeq transcript XM_001943025 PREDICTED: Acyrthosiphon pisum similar to AGAP000295-PA (LOC100165710), mRNA	3.01292	2.04988e-12	ACYPI006640
ACYPI000308-RA RefSeq transcript XM_001945378 PREDICTED: Acyrthosiphon pisum similar to Endocuticle structural glycoprotein SgAbd-9 (LOC100158888), mRNA	3.01265	4.33913e-11	ACYPI000308
ACYPI53099-RA Glean transcript GLEAN_33099	3.00859	4.00152e-18
ACYPI002604-RA RefSeq transcript XM_001950729 PREDICTED: Acyrthosiphon pisum similar to phytoene dehydrogenase (LOC100161380), mRNA	2.98703	2.27239e-15	ACYPI002604
ACYPI000673-RA RefSeq transcript XM_001944383 PREDICTED: Acyrthosiphon pisum similar to CG6006 CG6006-PC (LOC100159286), mRNA	2.97615	1.47154e-09	ACYPI000673
ACYPI000699-RA RefSeq transcript XM_001949126 PREDICTED: Acyrthosiphon pisum similar to troponin C type IIa (LOC100159315), mRNA	2.97129	9.35927e-07	ACYPI000699
ACYPI003340-RA RefSeq transcript XM_001946361 PREDICTED: Acyrthosiphon pisum similar to histone acetyltransferase Gcn5, putative (LOC100162171), mRNA	2.9673	7.38224e-16	ACYPI003340
ACYPI007579-RA RefSeq transcript XM_001952086 PREDICTED: Acyrthosiphon pisum similar to GA10921-PA (LOC100166728), mRNA	2.96644	2.01772e-17	ACYPI009474
ACYPI000214-RA RefSeq transcript XM_001952503 PREDICTED: Acyrthosiphon pisum similar to GA11787-PA, transcript variant 1 (LOC100158780), mRNA	2.96357	3.40373e-09	ACYPI000214
ACYPI28295-RA Glean transcript GLEAN_08295	2.96264	8.73887e-13	ACYPI28295
ACYPI42351-RA Glean transcript GLEAN_22351	2.96212	3.4937e-18
ACYPI002537-RA RefSeq transcript XM_001948720 PREDICTED: Acyrthosiphon pisum similar to AGAP002047-PA (LOC100161304), mRNA	2.96061	4.92934e-15	ACYPI002537	Atlastin-1
ACYPI49971-RA Glean transcript GLEAN_29971	2.96044	1.42935e-29	ACYPI49971
ACYPI002679-RA RefSeq transcript XM_001952021 PREDICTED: Acyrthosiphon pisum similar to glutathione S-transferase-like protein (LOC100161459), mRNA	2.95333	2.37212e-10	ACYPI002679
ACYPI001593-RA RefSeq transcript XM_001945277 PREDICTED: Acyrthosiphon pisum similar to NADPH cytochrome P450 reductase (LOC100160284), mRNA	2.94706	4.92493e-16	ACYPI001593
ACYPI006537-RA RefSeq transcript XM_001947396 PREDICTED: Acyrthosiphon pisum similar to AGAP005440-PA (LOC100165602), mRNA	2.94658	1.64976e-13	ACYPI006537	AGAP005440-PA
ACYPI001479-RA RefSeq transcript XM_001948062 PREDICTED: Acyrthosiphon pisum similar to CG7367 CG7367-PA (LOC100160158), mRNA	2.9434	2.7335e-07	ACYPI001479	Pancreatic lipase-related protein 1
ACYPI46919-RA Glean transcript GLEAN_26919	2.93863	4.80178e-30
ACYPI20906-RA Glean transcript GLEAN_00906	2.93757	8.24343e-20
ACYPI000714-RA RefSeq transcript XM_001948648 PREDICTED: Acyrthosiphon pisum similar to Stretchin-Mlck CG18255-PA (LOC100159331), mRNA	2.9281	9.9693e-11
ACYPI006990-RA RefSeq transcript XM_001950730 PREDICTED: Acyrthosiphon pisum similar to juvenile hormone esterase (LOC100166089), mRNA	2.92392	5.57642e-18	ACYPI006990
ACYPI008421-RA RefSeq transcript XM_001951391 PREDICTED: Acyrthosiphon pisum similar to Enolase-phosphatase E1 (2,3-diketo-5-methylthio-1-phosphopentane phosphatase) (MASA homolog) (LOC100167644), mRNA	2.92256	2.68542e-14	ACYPI008421
ACYPI53069-RA Glean transcript GLEAN_33069	2.92249	2.34724e-21	ACYPI53069	CG2789
ACYPI33660-RA Glean transcript GLEAN_13660	2.92015	2.90259e-23
ACYPI009129-RA RefSeq transcript XM_001951081 PREDICTED: Acyrthosiphon pisum similar to CG5890 CG5890-PA (LOC100168428), partial mRNA	2.91787	2.23586e-11	ACYPI009129
ACYPI28868-RA Glean transcript GLEAN_08868	2.91189	1.4037e-17
ACYPI009615-RA RefSeq transcript XM_001948161 PREDICTED: Acyrthosiphon pisum similar to CG34127 CG34127-PA (LOC100168952), mRNA	2.91024	2.05968e-16	ACYPI009615	CG34127
ACYPI52705-RA Glean transcript GLEAN_32705	2.90505	1.05542e-23	ACYPI52705
ACYPI006969-RB RefSeq transcript XM_001948194 PREDICTED: Acyrthosiphon pisum similar to cytoplasmic actin, transcript variant 2 (LOC100166065), mRNA	2.90448	9.51641e-15
ACYPI008623-RA RefSeq transcript XM_001952326 PREDICTED: Acyrthosiphon pisum similar to allatostatin receptor (LOC100167869), partial mRNA	2.89798	2.71849e-17	ACYPI008623
ACYPI007232-RA RefSeq transcript XM_001944067 PREDICTED: Acyrthosiphon pisum similar to CG31116 CG31116-PE (LOC100166352), mRNA	2.89567	9.49628e-13	ACYPI007232
ACYPI007362-RA RefSeq transcript XM_001945307 PREDICTED: Acyrthosiphon pisum similar to sulfide quinone reductase (LOC100166496), mRNA	2.89417	9.28785e-14	ACYPI007362
ACYPI39725-RA Glean transcript GLEAN_19725	2.89244	2.53347e-18	ACYPI39725
ACYPI003699-RA RefSeq transcript XM_001945119 PREDICTED: Acyrthosiphon pisum similar to filamin, putative (LOC100162552), mRNA	2.89077	2.25917e-14	ACYPI003699
ACYPI36926-RA Glean transcript GLEAN_16926	2.8901	1.1162e-25	ACYPI36926
ACYPI009024-RA RefSeq transcript XM_001943179 PREDICTED: Acyrthosiphon pisum similar to carboxylesterase; esterase FE4 (LOC100168312), mRNA	2.88677	1.33234e-18	ACYPI009024
ACYPI002127-RA RefSeq transcript XM_001952005 PREDICTED: Acyrthosiphon pisum similar to glutathione S-transferase-like protein (LOC100160859), mRNA	2.88237	1.31967e-08	ACYPI002127
ACYPI24316-RA Glean transcript GLEAN_04316	2.88228	9.02989e-23	ACYPI24316	uncharacterized protein
ACYPI007115-RA RefSeq transcript XM_001952623 PREDICTED: Acyrthosiphon pisum similar to conserved hypothetical protein (LOC100166227), partial mRNA	2.88203	2.72818e-12
ACYPI33334-RA Glean transcript GLEAN_13334	2.882	3.99656e-20
ACYPI000631-RA RefSeq transcript XM_001950779 PREDICTED: Acyrthosiphon pisum similar to carboxylesterase; esterase FE4 (LOC100159239), mRNA	2.87923	1.55396e-05	ACYPI000631
ACYPI002545-RD RefSeq transcript XM_001945423 PREDICTED: Acyrthosiphon pisum similar to MGC80968 protein, transcript variant 4 (LOC100161313), mRNA	2.87824	9.3503e-10	ACYPI009205
ACYPI001689-RA RefSeq transcript XM_001946174 PREDICTED: Acyrthosiphon pisum similar to nitric oxide synthase (LOC100160390), mRNA	2.87442	8.12213e-11	ACYPI001689
ACYPI002949-RA RefSeq transcript XM_001948853 PREDICTED: Acyrthosiphon pisum similar to Niemann-Pick Type C-2, putative (LOC100161750), mRNA	2.86923	7.60738e-15	ACYPI002949
ACYPI004350-RA RefSeq transcript XM_001951421 PREDICTED: Acyrthosiphon pisum similar to carboxylesterase (LOC100163252), mRNA	2.86558	0.00164477	ACYPI004350
ACYPI006102-RA RefSeq transcript XM_001945185 PREDICTED: Acyrthosiphon pisum similar to dipeptidyl-peptidase (LOC100165139), mRNA	2.86517	2.94267e-14	ACYPI006102	dipeptidyl-peptidase
ACYPI001379-RA RefSeq transcript XM_001943933 PREDICTED: Acyrthosiphon pisum similar to CUG triplet repeat, RNA-binding protein 1 (LOC100160047), mRNA	2.86505	4.07081e-08	ACYPI001379	bru-2
ACYPI007824-RA RefSeq transcript XM_001950009 PREDICTED: Acyrthosiphon pisum similar to conserved hypothetical protein (LOC100166998), mRNA	2.8638	1.20628e-14	ACYPI007824	expressed protein
ACYPI33598-RA Glean transcript GLEAN_13598	2.86249	6.28104e-22	ACYPI003487
ACYPI29905-RA Glean transcript GLEAN_09905	2.85991	3.69571e-20	ACYPI29905	Nucleic-acid-binding protein from transposon X-element
ACYPI002846-RA RefSeq transcript XM_001945444 PREDICTED: Acyrthosiphon pisum similar to Ca2+/calmodulin-dependent protein kinase II (LOC100161639), partial mRNA	2.85294	4.72103e-06	ACYPI002846
ACYPI002253-RA RefSeq transcript XM_001949515 PREDICTED: Acyrthosiphon pisum similar to alpha-tocopherol transfer protein (LOC100160994), mRNA	2.84588	7.88332e-13	ACYPI002253
ACYPI006250-RA RefSeq transcript XM_001948266 PREDICTED: Acyrthosiphon pisum similar to pupal cuticle protein 78E, putative, transcript variant 1 (LOC100165293), mRNA	2.83893	1.54866e-10
ACYPI008081-RA RefSeq transcript XM_001949962 PREDICTED: Acyrthosiphon pisum similar to Ab1-133 (LOC100167272), mRNA	2.83884	9.37284e-22	ACYPI008081	nfx1-type zinc finger-containing protein
ACYPI34731-RA Glean transcript GLEAN_14731	2.83728	5.43841e-24	ACYPI003714	amp dependent coa ligase
ACYPI002718-RA RefSeq transcript XM_001946577 PREDICTED: Acyrthosiphon pisum hypothetical protein LOC100161501 (LOC100161501), mRNA	2.82844	2.22684e-05	ACYPI002718
ACYPI006569-RA RefSeq transcript XM_001944671 PREDICTED: Acyrthosiphon pisum similar to CG31217 CG31217-PA (LOC100165635), mRNA	2.82812	3.60851e-12	ACYPI006569	Limulus clotting factor C
ACYPI33342-RA Glean transcript GLEAN_13342	2.8246	3.05973e-17
ACYPI003371-RA RefSeq transcript XM_001951058 PREDICTED: Acyrthosiphon pisum similar to cytochrome P450 (LOC100162206), mRNA	2.82279	7.64061e-11	ACYPI003371
ACYPI22774-RA Glean transcript GLEAN_02774	2.82201	5.02473e-16
ACYPI007548-RA RefSeq transcript XM_001949324 PREDICTED: Acyrthosiphon pisum similar to CG8800 CG8800-PA (LOC100166696), mRNA	2.82154	6.44951e-14	ACYPI007548
ACYPI50826-RA Glean transcript GLEAN_30826	2.81842	6.61591e-19	ACYPI50826	uncharacterized protein
ACYPI38231-RA Glean transcript GLEAN_18231	2.81565	1.1262e-25	ACYPI38231	Zinc finger BED domain-containing protein 4
ACYPI002725-RA RefSeq transcript XM_001951752 PREDICTED: Acyrthosiphon pisum similar to Osiris 7 CG1153-PA (LOC100161508), mRNA	2.81437	3.37697e-12	ACYPI002725
ACYPI000132-RA RefSeq transcript XM_001943668 PREDICTED: Acyrthosiphon pisum hypothetical protein LOC100158692 (LOC100158692), mRNA	2.81261	2.91746e-05	ACYPI000132
ACYPI003700-RA RefSeq transcript XM_001949792 PREDICTED: Acyrthosiphon pisum similar to AGAP005828-PA (LOC100162553), mRNA	2.8113	1.13357e-12	ACYPI003700	Alpha-tubulin N-acetyltransferase
ACYPI008557-RA RefSeq transcript XM_001944175 PREDICTED: Acyrthosiphon pisum similar to CG30116 CG30116-PB (LOC100167797), partial mRNA	2.81062	3.03764e-08	ACYPI008557	uncharacterized protein
ACYPI24142-RA Glean transcript GLEAN_04142	2.79418	1.44436e-21	ACYPI24142	uncharacterized protein
ACYPI000361-RA RefSeq transcript XM_001949393 PREDICTED: Acyrthosiphon pisum similar to d-lactate dehydrognease 2, putative (LOC100158944), mRNA	2.78661	5.61097e-12	ACYPI000361
ACYPI29217-RA Glean transcript GLEAN_09217	2.78582	4.7454e-13	ACYPI005837
ACYPI003808-RA RefSeq transcript XM_001944138 PREDICTED: Acyrthosiphon pisum similar to CG32635 CG32635-PA (LOC100162667), mRNA	2.78579	1.35053e-09	ACYPI003808	uncharacterized protein
ACYPI001583-RA RefSeq transcript XM_001947070 PREDICTED: Acyrthosiphon pisum similar to tigger transposable element derived 4 (LOC100160272), mRNA	2.78482	6.14341e-06	ACYPI001583
ACYPI008042-RA RefSeq transcript XM_001948159 PREDICTED: Acyrthosiphon pisum similar to glutathione S-transferase (LOC100167231), mRNA	2.77175	7.96929e-22	ACYPI008042	GST
ACYPI000618-RA RefSeq transcript XM_001949690 PREDICTED: Acyrthosiphon pisum similar to putative serotonin receptor (LOC100159225), partial mRNA	2.76815	2.42664e-08	ACYPI000618	Serotonin receptor 1A
ACYPI008889-RA RefSeq transcript XM_001943101 PREDICTED: Acyrthosiphon pisum similar to AGAP006368-PA (LOC100168163), mRNA	2.76307	1.99276e-25	ACYPI008889	Odorant-binding protein 4
ACYPI009545-RA RefSeq transcript XM_001951083 PREDICTED: Acyrthosiphon pisum similar to serine 3-dehydrogenase (LOC100168880), mRNA	2.7602	7.41855e-16	ACYPI009545	antdh-PA
ACYPI52264-RA Glean transcript GLEAN_32264	2.75898	9.4549e-27	ACYPI52264	replication protein a kda dna-binding subunit
ACYPI006809-RA RefSeq transcript XM_001946256 PREDICTED: Acyrthosiphon pisum similar to predicted protein (LOC100165894), mRNA	2.75779	7.85992e-16	ACYPI006809	cmp-sialic acid transporter
ACYPI001590-RA RefSeq transcript XM_001950880 PREDICTED: Acyrthosiphon pisum similar to Leucine-rich repeat protein SHOC-2 (Ras-binding protein Sur-8) (LOC100160280), mRNA	2.75183	3.50904e-06	ACYPI001590	Leucine-rich repeat and death domain-containing protein
ACYPI37602-RA Glean transcript GLEAN_17602	2.74449	3.36715e-22	ACYPI37602
ACYPI007510-RA RefSeq transcript XM_001949730 PREDICTED: Acyrthosiphon pisum similar to prothoracicostatic peptide (LOC100166656), mRNA	2.7428	2.69459e-14	ACYPI007510
ACYPI008215-RA RefSeq transcript XM_001946732 PREDICTED: Acyrthosiphon pisum similar to nicotinic acetylcholine receptor subunit alpha10 (LOC100167418), mRNA	2.73948	1.69767e-17
ACYPI007137-RA RefSeq transcript XM_001949755 PREDICTED: Acyrthosiphon pisum similar to putative transposase yabusame-1 (LOC100166252), partial mRNA	2.7367	6.08336e-20	ACYPI007137	Yabusame-2
ACYPI38182-RA Glean transcript GLEAN_18182	2.7317	1.93906e-23	ACYPI38182
ACYPI003792-RA RefSeq transcript XM_001943789 PREDICTED: Acyrthosiphon pisum similar to CG4945 CG4945-PA (LOC100162649), mRNA	2.72893	7.48767e-14	ACYPI003792	serine/threonine-protein kinase
ACYPI36827-RA Glean transcript GLEAN_16827	2.72892	3.32951e-19	ACYPI001361
ACYPI008761-RA RefSeq transcript XM_001951052 PREDICTED: Acyrthosiphon pisum similar to CG1572 CG1572-PA (LOC100168024), mRNA	2.72574	1.71329e-12	ACYPI008761	uncharacterized protein
ACYPI27660-RA Glean transcript GLEAN_07660	2.71668	2.21327e-11	ACYPI005663
ACYPI009733-RA RefSeq transcript XM_001945750 PREDICTED: Acyrthosiphon pisum hypothetical protein LOC100169082 (LOC100169082), mRNA	2.71476	5.78469e-21	ACYPI009733
ACYPI006147-RA RefSeq transcript XM_001942687 PREDICTED: Acyrthosiphon pisum similar to putative odorant-binding protein (LOC100165186), mRNA	2.71463	7.01181e-12	ACYPI006147	Odorant-binding protein 2
ACYPI001958-RA RefSeq transcript XM_001946789 PREDICTED: Acyrthosiphon pisum similar to soluble guanylyl cyclase beta 1 subunit (LOC100160678), partial mRNA	2.71461	2.31476e-12	ACYPI001958	Guanylate cyclase soluble subunit beta-1
ACYPI008272-RA RefSeq transcript XM_001951127 PREDICTED: Acyrthosiphon pisum similar to AMP dependent coa ligase (LOC100167475), mRNA	2.7106	2.70444e-19	ACYPI008272	amp dependent coa ligase
ACYPI002990-RA RefSeq transcript XM_001946709 PREDICTED: Acyrthosiphon pisum similar to cytochrome P450 (LOC100161793), mRNA	2.70832	0.00105558	ACYPI002990
ACYPI006775-RA RefSeq transcript XM_001943902 PREDICTED: Acyrthosiphon pisum similar to death-associated small cytoplasmic leucine-rich protein SCLP (LOC100165853), mRNA	2.70744	3.69238e-22	ACYPI006775	Death-associated small cytoplasmic leucine-rich protein SCLP
ACYPI000134-RA RefSeq transcript XM_001943699 PREDICTED: Acyrthosiphon pisum similar to Na[+]-dependent inorganic phosphate cotransporter CG10207-PA (LOC100158694), mRNA	2.7001	1.90105e-09	ACYPI000134	Na( )-dependent inorganic phosphate cotransporter
ACYPI004021-RA RefSeq transcript XM_001952083 PREDICTED: Acyrthosiphon pisum similar to predicted protein (LOC100162902), mRNA	2.69576	1.31647e-08	ACYPI004021	thymidine phosphorylase precursor
ACYPI007580-RA RefSeq transcript XM_001951395 PREDICTED: Acyrthosiphon pisum similar to glucosyl/glucuronosyl transferases (LOC100166729), mRNA	2.69407	7.38199e-15
ACYPI47348-RA Glean transcript GLEAN_27348	2.69376	1.9606e-20	ACYPI47348	uncharacterized protein
ACYPI008454-RA RefSeq transcript XM_001950513 PREDICTED: Acyrthosiphon pisum similar to GA21913-PA (LOC100167683), mRNA	2.68846	1.12062e-22	ACYPI008454
ACYPI000530-RA RefSeq transcript XM_001949540 PREDICTED: Acyrthosiphon pisum similar to conserved hypothetical protein (LOC100159131), mRNA	2.68654	2.1256e-11	ACYPI000530
ACYPI001612-RA RefSeq transcript XM_001946017 PREDICTED: Acyrthosiphon pisum similar to mannoside acetylglucosaminyltransferase 1 (LOC100160307), mRNA	2.6862	1.19954e-16	ACYPI001612
ACYPI002813-RA RefSeq transcript XM_001944339 PREDICTED: Acyrthosiphon pisum hypothetical protein LOC100161602, transcript variant 1 (LOC100161602), mRNA	2.68472	8.25976e-15	ACYPI002813	uncharacterized protein
ACYPI001397-RA RefSeq transcript XM_001944401 PREDICTED: Acyrthosiphon pisum hypothetical protein LOC100160066 (LOC100160066), mRNA	2.68121	3.55838e-10	ACYPI001397	uncharacterized protein
ACYPI004700-RA RefSeq transcript XM_001945617 PREDICTED: Acyrthosiphon pisum similar to CG3556 CG3556-PA (LOC100163627), mRNA	2.6778	0.000138116	ACYPI004700
ACYPI31043-RA Glean transcript GLEAN_11043	2.66414	2.93525e-16
ACYPI30185-RA Glean transcript GLEAN_10185	2.66264	2.02376e-15	ACYPI000348
ACYPI007472-RA RefSeq transcript XM_001948340 PREDICTED: Acyrthosiphon pisum hypothetical protein LOC100166615 (LOC100166615), mRNA	2.66261	1.02876e-16	ACYPI007472	uncharacterized protein
ACYPI007030-RA RefSeq transcript XM_001944457 PREDICTED: Acyrthosiphon pisum similar to peroxidase (LOC100166131), mRNA	2.65936	1.16775e-18	ACYPI005760	Peroxidase
ACYPI009878-RA RefSeq transcript XM_001952683 PREDICTED: Acyrthosiphon pisum similar to chitinase 7 (LOC100169240), partial mRNA	2.65919	1.99923e-21	ACYPI009878
ACYPI001904-RA RefSeq transcript XM_001951356 PREDICTED: Acyrthosiphon pisum similar to Osiris (LOC100160620), mRNA	2.65792	3.22112e-12	ACYPI001904	osi3
ACYPI39369-RA Glean transcript GLEAN_19369	2.65348	1.3544e-20	ACYPI39369	hypothetical protein
ACYPI41180-RA Glean transcript GLEAN_21180	2.65014	5.42657e-23
ACYPI002813-RB RefSeq transcript XM_001944402 PREDICTED: Acyrthosiphon pisum hypothetical protein LOC100161602, transcript variant 2 (LOC100161602), mRNA	2.63744	1.86932e-09	ACYPI002813	uncharacterized protein
ACYPI42484-RA Glean transcript GLEAN_22484	2.63456	2.36493e-23	ACYPI42484
ACYPI008952-RA RefSeq transcript XM_001951453 PREDICTED: Acyrthosiphon pisum similar to Neural Lazarillo CG33126-PA (LOC100168232), mRNA	2.62914	2.17585e-17	ACYPI008952	apolipoprotein d
ACYPI45775-RA Glean transcript GLEAN_25775	2.62533	8.95899e-25
ACYPI23663-RA Glean transcript GLEAN_03663	2.62467	8.15927e-24	ACYPI53590	uncharacterized protein
ACYPI005451-RA RefSeq transcript XM_001944288 PREDICTED: Acyrthosiphon pisum similar to 79 kDa salivary apyrase (LOC100164432), mRNA	2.62464	6.10485e-16	ACYPI005451	uncharacterized protein
ACYPI000894-RA RefSeq transcript XM_001950258 PREDICTED: Acyrthosiphon pisum similar to MGC80934 protein (LOC100159533), partial mRNA	2.62381	5.38851e-08	ACYPI088826	Coatomer subunit beta
ACYPI33244-RA Glean transcript GLEAN_13244	2.62343	1.51133e-24	ACYPI33244	Aminopeptidase N-like protein
ACYPI56217-RA Glean transcript GLEAN_36217	2.62023	9.78067e-32	ACYPI56217	uncharacterized protein
ACYPI55918-RA Glean transcript GLEAN_35918	2.61565	3.4625e-29	ACYPI55918	uncharacterized protein
ACYPI005838-RA RefSeq transcript XM_001946643 PREDICTED: Acyrthosiphon pisum hypothetical protein LOC100164853 (LOC100164853), mRNA	2.61386	1.54924e-16	ACYPI005838
ACYPI003015-RA RefSeq transcript XM_001952355 PREDICTED: Acyrthosiphon pisum similar to conserved hypothetical protein (LOC100161820), mRNA	2.61181	1.50955e-09	ACYPI003015	uncharacterized protein
ACYPI44668-RA Glean transcript GLEAN_24668	2.61177	6.30008e-30	ACYPI062594
ACYPI005834-RA RefSeq transcript XM_001944149 PREDICTED: Acyrthosiphon pisum hypothetical protein LOC100164849, transcript variant 1 (LOC100164849), mRNA	2.60859	4.52019e-11	ACYPI085486
ACYPI55100-RA Glean transcript GLEAN_35100	2.60643	5.99775e-26
ACYPI004137-RA RefSeq transcript XM_001944080 PREDICTED: Acyrthosiphon pisum similar to cornichon (LOC100163022), mRNA	2.60622	1.44336e-07	ACYPI004137	ppcs
ACYPI007898-RA RefSeq transcript XM_001946833 PREDICTED: Acyrthosiphon pisum hypothetical protein LOC100167075 (LOC100167075), mRNA	2.60502	0.000449019	ACYPI007898
ACYPI005741-RA RefSeq transcript XM_001944052 PREDICTED: Acyrthosiphon pisum similar to GA16498-PA (LOC100164751), mRNA	2.60341	1.29539e-10
ACYPI40184-RA Glean transcript GLEAN_20184	2.58723	8.95899e-25
ACYPI41611-RA Glean transcript GLEAN_21611	2.58589	1.04516e-18
ACYPI006528-RA RefSeq transcript XM_001952037 PREDICTED: Acyrthosiphon pisum similar to jnk interacting protein (jip) (LOC100165593), mRNA	2.58449	7.75238e-12	ACYPI006528
ACYPI000639-RA RefSeq transcript XM_001948658 PREDICTED: Acyrthosiphon pisum similar to cytochrome P450 CYP6AX1 protein (LOC100159248), mRNA	2.58064	6.83131e-05
ACYPI39779-RA Glean transcript GLEAN_19779	2.58014	1.72612e-22	ACYPI003980	calcium/calmodulin-dependent nucleotide phosphodiesterase
ACYPI25673-RA Glean transcript GLEAN_05673	2.57797	9.13701e-22
ACYPI005793-RA RefSeq transcript XM_001950333 PREDICTED: Acyrthosiphon pisum similar to Y39E4A.3a (LOC100164806), mRNA	2.57786	5.18986e-07	ACYPI005793
ACYPI008154-RA RefSeq transcript XM_001947138 PREDICTED: Acyrthosiphon pisum similar to GA21065-PA (LOC100167353), mRNA	2.57724	8.07813e-21	ACYPI008154	GA21065
ACYPI003119-RA RefSeq transcript XM_001943327 PREDICTED: Acyrthosiphon pisum hypothetical protein LOC100161933 (LOC100161933), mRNA	2.57221	3.33367e-10	ACYPI003119
ACYPI008898-RA RefSeq transcript XM_001947855 PREDICTED: Acyrthosiphon pisum similar to CG6043 CG6043-PF (LOC100168172), mRNA	2.56954	1.42584e-14	ACYPI008898
ACYPI009346-RA RefSeq transcript XM_001948949 PREDICTED: Acyrthosiphon pisum hypothetical protein LOC100168666 (LOC100168666), partial mRNA	2.56604	1.0589e-18
ACYPI53590-RA Glean transcript GLEAN_33590	2.56235	9.74963e-26	ACYPI53590	uncharacterized protein
ACYPI001051-RA RefSeq transcript XM_001949972 PREDICTED: Acyrthosiphon pisum similar to solute carrier family 25, member 28 (LOC100159701), mRNA	2.56117	4.33119e-07	ACYPI001051	mitochondrial rna splicing protein
ACYPI002877-RA RefSeq transcript XM_001951087 PREDICTED: Acyrthosiphon pisum similar to Endocuticle structural glycoprotein SgAbd-9 (LOC100161674), partial mRNA	2.5517	8.90375e-10	ACYPI002877
ACYPI005310-RA RefSeq transcript XM_001946477 PREDICTED: Acyrthosiphon pisum similar to CG8503 CG8503-PA (LOC100164280), mRNA	2.54829	8.81657e-06	ACYPI005310
ACYPI26959-RA Glean transcript GLEAN_06959	2.54703	2.92768e-13	ACYPI26959
ACYPI007755-RA RefSeq transcript XM_001943857 PREDICTED: Acyrthosiphon pisum similar to alpha6-fucosyltransferase, putative (LOC100166919), partial mRNA	2.54593	5.18688e-14
ACYPI004888-RA RefSeq transcript XM_001950275 PREDICTED: Acyrthosiphon pisum similar to NFX1-type zinc finger-containing protein 1 (LOC100163831), mRNA	2.54368	9.0087e-22	ACYPI004888	nfx1-type zinc finger-containing protein
ACYPI33233-RA Glean transcript GLEAN_13233	2.54053	7.72138e-29
ACYPI003422-RA RefSeq transcript XM_001947576 PREDICTED: Acyrthosiphon pisum hypothetical protein LOC100162260 (LOC100162260), mRNA	2.53967	2.93208e-08	ACYPI003422	uncharacterized protein
ACYPI009178-RA RefSeq transcript XM_001947097 PREDICTED: Acyrthosiphon pisum similar to conserved hypothetical protein (LOC100168483), mRNA	2.53769	1.52222e-17	ACYPI009178	uncharacterized protein
ACYPI002334-RA RefSeq transcript XM_001942779 PREDICTED: Acyrthosiphon pisum similar to histone deacetylase (LOC100161082), mRNA	2.53731	1.30351e-12	ACYPI002334	Histone deacetylase 6
ACYPI53853-RA Glean transcript GLEAN_33853	2.53514	2.92096e-24
ACYPI45279-RA Glean transcript GLEAN_25279	2.5321	7.67944e-26	ACYPI45279	transposase
ACYPI001565-RA RefSeq transcript XM_001952812 PREDICTED: Acyrthosiphon pisum similar to AGAP007887-PA (LOC100160253), mRNA	2.53132	0.000435255	ACYPI001565	uncharacterized protein
ACYPI005024-RA RefSeq transcript XM_001950733 PREDICTED: Acyrthosiphon pisum similar to CG31522 CG31522-PA (LOC100163976), mRNA	2.53067	5.01303e-13
ACYPI010156-RA RefSeq transcript XM_001946187 PREDICTED: Acyrthosiphon pisum similar to adenylate cyclase (LOC100169548), mRNA	2.53061	1.33303e-18
ACYPI21437-RA Glean transcript GLEAN_01437	2.5305	1.00582e-14	ACYPI21437
ACYPI003652-RA RefSeq transcript XM_001950455 PREDICTED: Acyrthosiphon pisum similar to Helix loop helix protein 3B CG2655-PA (LOC100162502), mRNA	2.53027	3.94551e-14	ACYPI003652	Helix loop helix protein 3B
ACYPI008112-RA RefSeq transcript XM_001946095 PREDICTED: Acyrthosiphon pisum similar to CG6972 CG6972-PA (LOC100167305), mRNA	2.52913	7.41824e-15	ACYPI008112	CG6972
ACYPI008059-RA RefSeq transcript XM_001952656 PREDICTED: Acyrthosiphon pisum similar to alpha-glucosidase (LOC100167248), mRNA	2.52911	1.34619e-16	ACYPI008059
ACYPI007738-RA RefSeq transcript XM_001951962 PREDICTED: Acyrthosiphon pisum similar to predicted protein (LOC100166900), partial mRNA	2.52872	4.6268e-16	ACYPI006334	Kelch-like protein 3
ACYPI28549-RA Glean transcript GLEAN_08549	2.52628	2.03923e-17	ACYPI28549	GK19073
ACYPI000312-RA RefSeq transcript XM_001943810 PREDICTED: Acyrthosiphon pisum similar to oxidase/peroxidase (LOC100158892), mRNA	2.52503	3.07815e-10	ACYPI000312
ACYPI35535-RA Glean transcript GLEAN_15535	2.5235	4.25526e-13	ACYPI35535	Transposase Tn3
ACYPI000435-RA RefSeq transcript XM_001951280 PREDICTED: Acyrthosiphon pisum hypothetical protein LOC100159024 (LOC100159024), mRNA	2.51348	4.99582e-11	ACYPI081932	uncharacterized protein
ACYPI25843-RA Glean transcript GLEAN_05843	2.51195	5.88746e-19
ACYPI008914-RA RefSeq transcript XM_001943412 PREDICTED: Acyrthosiphon pisum similar to CG12017 CG12017-PA (LOC100168188), mRNA	2.50999	1.16916e-18	ACYPI008914	CG12017
ACYPI003369-RA RefSeq transcript XM_001946406 PREDICTED: Acyrthosiphon pisum similar to hCG2016942 (LOC100162204), mRNA	2.50856	6.55033e-11	ACYPI003369
ACYPI005094-RA RefSeq transcript XM_001943576 PREDICTED: Acyrthosiphon pisum similar to sulfate transporter (LOC100164052), mRNA	2.50849	1.11556e-08	ACYPI005094	Prestin
ACYPI51002-RA Glean transcript GLEAN_31002	2.50768	1.50788e-30	ACYPI51002	uncharacterized protein
ACYPI007389-RA RefSeq transcript XM_001949252 PREDICTED: Acyrthosiphon pisum similar to CG5873 CG5873-PA (LOC100166526), mRNA	2.50747	2.58175e-22	ACYPI007389	Oxidase/peroxidase
ACYPI000629-RA RefSeq transcript XM_001945104 PREDICTED: Acyrthosiphon pisum similar to G1/S-specific cyclin-E (DmCycE) (LOC100159237), mRNA	2.50643	3.53106e-11	ACYPI000629
ACYPI004773-RA RefSeq transcript XM_001950163 PREDICTED: Acyrthosiphon pisum similar to beat protein (LOC100163710), mRNA	2.50211	1.02239e-10	ACYPI004773
ACYPI50180-RA Glean transcript GLEAN_30180	2.50114	2.03254e-17
ACYPI008991-RA RefSeq transcript XM_001947972 PREDICTED: Acyrthosiphon pisum similar to AGAP005528-PA (LOC100168272), mRNA	2.50023	1.32462e-17	ACYPI008991	N-methyl-D-aspartate receptor glutamate-binding subunit
ACYPI24923-RA Glean transcript GLEAN_04923	2.49955	1.69559e-16	ACYPI24923	uncharacterized protein
ACYPI009525-RA RefSeq transcript XM_001942520 PREDICTED: Acyrthosiphon pisum similar to glucose dehydrogenase (LOC100168857), mRNA	2.49866	1.04211e-23	ACYPI009525
ACYPI000635-RA RefSeq transcript XM_001949128 PREDICTED: Acyrthosiphon pisum similar to conserved hypothetical protein (LOC100159243), mRNA	2.4972	1.47825e-09	ACYPI000635
ACYPI38671-RA Glean transcript GLEAN_18671	2.49694	1.62001e-21	ACYPI38671
ACYPI009090-RA RefSeq transcript XM_001948336 PREDICTED: Acyrthosiphon pisum similar to CG7217 CG7217-PB, transcript variant 1 (LOC100168384), mRNA	2.49096	2.29747e-12
ACYPI000634-RA RefSeq transcript XM_001948579 PREDICTED: Acyrthosiphon pisum similar to mitochondrial solute carrier protein, putative (LOC100159242), mRNA	2.48827	3.50666e-13
ACYPI006690-RA RefSeq transcript XM_001948174 PREDICTED: Acyrthosiphon pisum similar to conserved hypothetical protein (LOC100165761), mRNA	2.48363	5.70936e-12	ACYPI006690	uncharacterized protein
ACYPI21512-RA Glean transcript GLEAN_01512	2.48312	7.70095e-19
ACYPI43707-RA Glean transcript GLEAN_23707	2.48286	1.21621e-25	ACYPI43707	protein Wnt-11b-1-like
ACYPI50614-RA Glean transcript GLEAN_30614	2.48009	8.30103e-27	ACYPI071330	uncharacterized protein
ACYPI002543-RA RefSeq transcript XM_001949905 PREDICTED: Acyrthosiphon pisum similar to arylalkylamine N-acetyltransferase (LOC100161311), mRNA	2.47834	3.25515e-09	ACYPI002543	Arylalkylamine N-acetyltransferase
ACYPI21048-RA Glean transcript GLEAN_01048	2.47347	6.11681e-24	ACYPI21048
ACYPI003663-RA RefSeq transcript XM_001949954 PREDICTED: Acyrthosiphon pisum similar to CG15173 CG15173-PA (LOC100162514), mRNA	2.47163	1.84809e-10	ACYPI003663
ACYPI007096-RA RefSeq transcript XM_001944088 PREDICTED: Acyrthosiphon pisum similar to predicted protein (LOC100166203), mRNA	2.47104	8.82808e-11	ACYPI081478	uncharacterized protein
ACYPI008309-RA RefSeq transcript XM_001945494 PREDICTED: Acyrthosiphon pisum hypothetical protein LOC100167515 (LOC100167515), mRNA	2.46717	1.91104e-10	ACYPI008309
ACYPI002300-RA RefSeq transcript XM_001951624 PREDICTED: Acyrthosiphon pisum similar to Ring finger and CCCH-type zinc finger domains 2 (LOC100161045), mRNA	2.46122	9.90974e-09	ACYPI002300
ACYPI001813-RA RefSeq transcript XM_001949825 PREDICTED: Acyrthosiphon pisum similar to NMDA-type glutamate receptor 1 (LOC100160524), mRNA	2.46105	1.65562e-08	ACYPI001813	nmda receptor subunit
ACYPI31150-RA Glean transcript GLEAN_11150	2.45436	3.55236e-16
ACYPI41071-RA Glean transcript GLEAN_21071	2.45362	4.99886e-26	ACYPI41071	AGAP000619-PA
ACYPI008370-RA RefSeq transcript XM_001944628 PREDICTED: Acyrthosiphon pisum similar to CLIP-domain serine protease subfamily A (AGAP011789-PA) (LOC100167585), partial mRNA	2.4504	4.76819e-13	ACYPI008370
ACYPI001937-RA RefSeq transcript XM_001946330 PREDICTED: Acyrthosiphon pisum hypothetical protein LOC100160655 (LOC100160655), mRNA	2.45036	0.000357584	ACYPI001937
ACYPI000733-RA RefSeq transcript XM_001951605 PREDICTED: Acyrthosiphon pisum similar to angiotensin converting enzyme (LOC100159353), partial mRNA	2.44732	0.000411906	ACYPI084554
ACYPI38406-RA Glean transcript GLEAN_18406	2.44617	4.25072e-19	ACYPI38406	Transporter
ACYPI51540-RA Glean transcript GLEAN_31540	2.44603	1.19625e-28	ACYPI51540	Docking protein 2
ACYPI003639-RA RefSeq transcript XM_001952387 PREDICTED: Acyrthosiphon pisum similar to conserved hypothetical protein (LOC100162489), mRNA	2.44563	1.25221e-11	ACYPI003639
ACYPI50527-RA Glean transcript GLEAN_30527	2.4423	2.12871e-27	ACYPI50527
ACYPI009056-RA RefSeq transcript XM_001947808 PREDICTED: Acyrthosiphon pisum similar to conserved hypothetical protein (LOC100168347), mRNA	2.4394	3.8657e-17	ACYPI009056	uncharacterized protein
ACYPI007480-RA RefSeq transcript XM_001944414 PREDICTED: Acyrthosiphon pisum similar to mammalian FE65 Homolog family member (feh-1) (LOC100166623), mRNA	2.43877	2.21213e-16	ACYPI007480	mammalian fe65 homolog family member feh-1
ACYPI000655-RA RefSeq transcript XM_001950105 PREDICTED: Acyrthosiphon pisum similar to arylalkylamine N-acetyltransferase (LOC100159264), mRNA	2.43779	4.62241e-07	ACYPI000655	hypothetical
ACYPI55997-RA Glean transcript GLEAN_35997	2.43761	3.69848e-30	ACYPI55997
ACYPI009917-RA RefSeq transcript XM_001942769 PREDICTED: Acyrthosiphon pisum similar to stn-A (LOC100169285), mRNA	2.43239	3.27248e-19	ACYPI009917	uncharacterized protein
ACYPI001997-RA RefSeq transcript XM_001945950 PREDICTED: Acyrthosiphon pisum similar to AGAP007029-PA (LOC100160721), mRNA	2.42983	9.7555e-07	ACYPI001997	glucosyl/glucuronosyl transferases
ACYPI24679-RA Glean transcript GLEAN_04679	2.42941	3.69571e-20	ACYPI24679
ACYPI007046-RA RefSeq transcript XM_001950447 PREDICTED: Acyrthosiphon pisum similar to CG33090 CG33090-PB (LOC100166147), partial mRNA	2.425	1.00962e-13	ACYPI005416	Non-lysosomal glucosylceramidase
ACYPI003940-RA RefSeq transcript XM_001949032 PREDICTED: Acyrthosiphon pisum similar to CG6271 CG6271-PA (LOC100162817), mRNA	2.42437	8.07628e-07	ACYPI003940
ACYPI001517-RA RefSeq transcript XM_001948966 PREDICTED: Acyrthosiphon pisum similar to glucosyl/glucuronosyl transferases (LOC100160202), mRNA	2.42272	6.44439e-05	ACYPI001517	AGAP007028-PA
ACYPI34100-RA Glean transcript GLEAN_14100	2.42185	5.80371e-26
ACYPI005391-RA RefSeq transcript XM_001946603 PREDICTED: Acyrthosiphon pisum similar to dual specificity protein phosphatase (LOC100164369), mRNA	2.41993	1.54019e-12	ACYPI005391
ACYPI009341-RA RefSeq transcript XM_001952550 PREDICTED: Acyrthosiphon pisum similar to CG33786 CG33786-PA (LOC100168661), mRNA	2.41847	9.93205e-16	ACYPI009341	Ischemia/reperfusion inducible protein
ACYPI003406-RA RefSeq transcript XM_001952829 PREDICTED: Acyrthosiphon pisum similar to predicted protein (LOC100162243), partial mRNA	2.41751	0.00112232	ACYPI003886
ACYPI36529-RA Glean transcript GLEAN_16529	2.41224	3.30737e-25	ACYPI28159
ACYPI003713-RA RefSeq transcript XM_001943766 PREDICTED: Acyrthosiphon pisum similar to Transport and Golgi organization 2 CG11176-PA (LOC100162567), mRNA	2.412	3.41689e-11	ACYPI003713
ACYPI30553-RA Glean transcript GLEAN_10553	2.40965	2.83935e-21	ACYPI30553	uncharacterized protein
ACYPI007067-RA RefSeq transcript XM_001948461 PREDICTED: Acyrthosiphon pisum hypothetical protein LOC100166173 (LOC100166173), mRNA	2.40899	8.0653e-06	ACYPI007067
ACYPI000916-RA RefSeq transcript XM_001948241 PREDICTED: Acyrthosiphon pisum similar to aromatic amino acid decarboxylase (LOC100159557), partial mRNA	2.40707	6.50763e-14	ACYPI000916
ACYPI008386-RB RefSeq transcript XM_001946776 PREDICTED: Acyrthosiphon pisum similar to CG30100 CG30100-PA, transcript variant 2 (LOC100167603), mRNA	2.40635	1.27869e-16	ACYPI008386
ACYPI20093-RA Glean transcript GLEAN_00093	2.40478	1.34461e-11	ACYPI20093	uncharacterized protein
ACYPI007833-RA RefSeq transcript XM_001951686 PREDICTED: Acyrthosiphon pisum hypothetical protein LOC100167008 (LOC100167008), mRNA	2.40037	3.81594e-16	ACYPI007833
ACYPI005084-RA RefSeq transcript XM_001948546 PREDICTED: Acyrthosiphon pisum similar to cytochrome P450 CYP6AX1 protein (LOC100164042), mRNA	2.40007	1.74797e-14	ACYPI005084	Cytochrome P450
ACYPI46836-RA Glean transcript GLEAN_26836	2.39916	4.88908e-27	ACYPI46836	uncharacterized protein
ACYPI006536-RA RefSeq transcript XM_001943836 PREDICTED: Acyrthosiphon pisum similar to Glycoprotein 3-alpha-L-fucosyltransferase A (Core alpha-(1,3)-fucosyltransferase) (LOC100165601), partial mRNA	2.39724	1.11913e-12
ACYPI54118-RA Glean transcript GLEAN_34118	2.39354	6.25228e-23
ACYPI008074-RA RefSeq transcript XM_001945319 PREDICTED: Acyrthosiphon pisum similar to fibroblast growth factor 71 (LOC100167265), mRNA	2.39151	6.78216e-20	ACYPI008074	Fibroblast growth factor 1
ACYPI24300-RA Glean transcript GLEAN_04300	2.39113	1.01305e-20	ACYPI24300
ACYPI008392-RA RefSeq transcript XM_001949029 PREDICTED: Acyrthosiphon pisum similar to exocyst complex component sec6 (LOC100167611), partial mRNA	2.38502	4.90246e-21	ACYPI008392	Exocyst complex component 3
ACYPI40948-RA Glean transcript GLEAN_20948	2.38331	1.20677e-16	ACYPI40948
ACYPI001303-RA RefSeq transcript XM_001950984 PREDICTED: Acyrthosiphon pisum similar to 3-phosphoinositide dependent protein kinase-1 (LOC100159966), mRNA	2.37883	4.40564e-12	ACYPI001303
ACYPI005887-RA RefSeq transcript XM_001948994 PREDICTED: Acyrthosiphon pisum similar to vitellogenin-1 (LOC100164907), mRNA	2.37022	2.21791e-08	ACYPI005887	Pancreatic lipase-related protein 2
ACYPI52118-RA Glean transcript GLEAN_32118	2.36731	1.72466e-30	ACYPI52118
ACYPI008259-RA RefSeq transcript XM_001951303 PREDICTED: Acyrthosiphon pisum similar to short-chain dehydrogenase (LOC100167462), mRNA	2.36482	6.31652e-11	ACYPI008259
ACYPI21906-RA Glean transcript GLEAN_01906	2.3648	1.9546e-11	ACYPI21906	Arylsulfatase B
ACYPI001567-RA RefSeq transcript XM_001944948 PREDICTED: Acyrthosiphon pisum similar to CG7536 CG7536-PA (LOC100160255), mRNA	2.3598	0.00190823	ACYPI001567
ACYPI004667-RA RefSeq transcript XM_001952280 PREDICTED: Acyrthosiphon pisum similar to malate dehydrogenase (LOC100163591), partial mRNA	2.3597	1.03262e-08	ACYPI001355
ACYPI20178-RA Glean transcript GLEAN_00178	2.35465	7.61504e-22
ACYPI34963-RA Glean transcript GLEAN_14963	2.35332	1.33678e-27	ACYPI34963	hypothetical protein
ACYPI002946-RA RefSeq transcript XM_001947554 PREDICTED: Acyrthosiphon pisum similar to AGAP007732-PA (LOC100161747), mRNA	2.353	3.16875e-16
ACYPI41475-RA Glean transcript GLEAN_21475	2.35066	3.18161e-26	ACYPI41475	uncharacterized protein
ACYPI30892-RA Glean transcript GLEAN_10892	2.35061	5.87566e-20	ACYPI30892
ACYPI003407-RA RefSeq transcript XM_001948917 PREDICTED: Acyrthosiphon pisum similar to glucosyl/glucuronosyl transferases (LOC100162244), mRNA	2.34937	9.41809e-08	ACYPI003407
ACYPI006904-RA RefSeq transcript XM_001948560 PREDICTED: Acyrthosiphon pisum similar to AGAP000973-PA (LOC100165996), mRNA	2.34834	1.03005e-15	ACYPI006904	neutral ceramidase precursor
ACYPI45991-RA Glean transcript GLEAN_25991	2.34765	6.28104e-22
ACYPI004778-RA RefSeq transcript XM_001952051 PREDICTED: Acyrthosiphon pisum hypothetical protein LOC100163715 (LOC100163715), mRNA	2.34325	0.000284258	ACYPI082469
ACYPI001095-RA RefSeq transcript XM_001946559 PREDICTED: Acyrthosiphon pisum similar to cuticle protein, putative (LOC100159746), mRNA	2.3409	4.40621e-09	ACYPI001095
ACYPI003846-RA RefSeq transcript XM_001943112 PREDICTED: Acyrthosiphon pisum similar to tan CG12120-PA (LOC100162707), mRNA	2.33831	7.20352e-12	ACYPI003846
ACYPI005585-RA RefSeq transcript XM_001951587 PREDICTED: Acyrthosiphon pisum similar to 4-aminobutyrate aminotransferase (LOC100164587), mRNA	2.33741	1.18791e-10	ACYPI005585
ACYPI004654-RA RefSeq transcript XM_001944718 PREDICTED: Acyrthosiphon pisum similar to Collagen (LOC100163577), mRNA	2.3363	7.64761e-11	ACYPI004654	collagen alpha-2(IV) chain-like
ACYPI54405-RA Glean transcript GLEAN_34405	2.33344	7.28795e-28	ACYPI54405	uncharacterized protein
ACYPI005624-RA RefSeq transcript XM_001946295 PREDICTED: Acyrthosiphon pisum hypothetical protein LOC100164630 (LOC100164630), mRNA	2.33151	9.56497e-15	ACYPI005624	uncharacterized protein
ACYPI009604-RA RefSeq transcript XM_001944381 PREDICTED: Acyrthosiphon pisum similar to AGAP001615-PA (LOC100168941), mRNA	2.33026	2.18763e-15	ACYPI009604	uncharacterized protein
ACYPI004444-RA RefSeq transcript XM_001950003 PREDICTED: Acyrthosiphon pisum similar to insulin-like peptide 6 precursor splice (LOC100163350), mRNA	2.33022	7.00249e-20	ACYPI004444
ACYPI39644-RA Glean transcript GLEAN_19644	2.32942	5.15473e-19	ACYPI39644
ACYPI001305-RA RefSeq transcript XM_001946650 PREDICTED: Acyrthosiphon pisum hypothetical protein LOC100159968 (LOC100159968), mRNA	2.32893	2.22636e-07	ACYPI001305	uncharacterized protein
ACYPI001657-RA RefSeq transcript XM_001947215 PREDICTED: Acyrthosiphon pisum similar to CG1443 CG1443-PA (LOC100160356), mRNA	2.32666	6.93654e-06	ACYPI001657	Fatty acyl-CoA reductase 1
ACYPI005823-RA RefSeq transcript XM_001947671 PREDICTED: Acyrthosiphon pisum similar to Putative pyridoxamine 5-phosphate oxidase (LOC100164836), partial mRNA	2.32447	3.00181e-09	ACYPI005823
ACYPI32234-RA Glean transcript GLEAN_12234	2.32435	4.0145e-21	ACYPI32234
ACYPI002292-RA RefSeq transcript XM_001950117 PREDICTED: Acyrthosiphon pisum similar to rab32 (LOC100161036), mRNA	2.32222	2.91629e-11	ACYPI002292	Ras-related protein Rab-32
ACYPI000473-RA RefSeq transcript XM_001952346 PREDICTED: Acyrthosiphon pisum similar to CG14661 CG14661-PA (LOC100159064), mRNA	2.32179	4.87512e-14	ACYPI000473	Circadian clock-controlled protein
ACYPI009768-RA RefSeq transcript XM_001946770 PREDICTED: Acyrthosiphon pisum similar to conserved hypothetical protein (LOC100169121), mRNA	2.31826	5.14234e-18	ACYPI009768
ACYPI010008-RA RefSeq transcript XM_001949544 PREDICTED: Acyrthosiphon pisum similar to CG14232 CG14232-PA (LOC100169382), mRNA	2.31307	8.24358e-13	ACYPI010008	uncharacterized protein
ACYPI009436-RA RefSeq transcript XM_001943636 PREDICTED: Acyrthosiphon pisum similar to isovaleryl-CoA dehydrogenase, mitochondrial (LOC100168762), mRNA	2.31055	2.58431e-10	ACYPI086826
ACYPI000234-RA RefSeq transcript XM_001950964 PREDICTED: Acyrthosiphon pisum similar to transposase domain-containing protein (LOC100158805), partial mRNA	2.30845	4.68741e-06	ACYPI000234	transposase domain-containing protein
ACYPI008503-RA RefSeq transcript XM_001944529 PREDICTED: Acyrthosiphon pisum similar to cuticular protein 15 from Low Complexity family (AGAP009759-PA) (LOC100167736), mRNA	2.30743	1.3799e-22	ACYPI008503	cuticular protein 15 from Low Complexity family (AGAP009759-PA)
ACYPI007278-RA RefSeq transcript XM_001943405 PREDICTED: Acyrthosiphon pisum similar to AGAP011745-PA (LOC100166402), mRNA	2.30703	6.5648e-11	ACYPI007278
ACYPI009750-RA RefSeq transcript XM_001946286 PREDICTED: Acyrthosiphon pisum similar to ATP/GTP binding protein 1 (LOC100169101), mRNA	2.30672	1.38205e-19	ACYPI009750	uncharacterized protein
ACYPI000761-RA RefSeq transcript XM_001951431 PREDICTED: Acyrthosiphon pisum similar to cytochrome P450 CYP6Y1 (LOC100159387), mRNA	2.30103	9.16976e-06	ACYPI000761
ACYPI003425-RA RefSeq transcript XM_001947641 PREDICTED: Acyrthosiphon pisum similar to RUN domain-containing protein 1 (LOC100162264), mRNA	2.2986	2.89299e-11	ACYPI003425	run domain-containing protein
ACYPI000513-RA RefSeq transcript XM_001944415 PREDICTED: Acyrthosiphon pisum similar to conserved hypothetical protein (LOC100159113), partial mRNA	2.29333	1.93662e-09	ACYPI000513
ACYPI53825-RA Glean transcript GLEAN_33825	2.29207	2.36555e-25	ACYPI53825
ACYPI010031-RA RefSeq transcript XM_001946843 PREDICTED: Acyrthosiphon pisum similar to Osiris 12 CG1154-PA (LOC100169409), mRNA	2.29115	5.7992e-16	ACYPI010031	osiris
ACYPI000866-RA RefSeq transcript XM_001950690 PREDICTED: Acyrthosiphon pisum similar to AGAP005849-PA (LOC100159502), mRNA	2.29107	5.68824e-06	ACYPI000866	Colmedin
ACYPI003795-RA RefSeq transcript XM_001945633 PREDICTED: Acyrthosiphon pisum similar to suppressor of cytokine signaling 9 (LOC100162652), mRNA	2.28994	7.67712e-16	ACYPI003795
ACYPI36097-RA Glean transcript GLEAN_16097	2.2893	7.68052e-23
ACYPI006275-RA RefSeq transcript XM_001945127 PREDICTED: Acyrthosiphon pisum similar to AGAP001147-PA (LOC100165318), mRNA	2.28782	5.55953e-16	ACYPI006275
ACYPI006555-RA RefSeq transcript XM_001943212 PREDICTED: Acyrthosiphon pisum similar to calcium/calmodulin-dependent protein kinase kinase (LOC100165620), mRNA	2.28328	3.55807e-14	ACYPI006555
ACYPI007190-RA RefSeq transcript XM_001942869 PREDICTED: Acyrthosiphon pisum similar to pyruvate dehydrogenase kinase (LOC100166307), mRNA	2.28258	2.48329e-17	ACYPI007190
ACYPI001150-RA RefSeq transcript XM_001950254 PREDICTED: Acyrthosiphon pisum similar to AGAP010734-PA (LOC100159803), mRNA	2.28103	1.05938e-13	ACYPI001150	chorion peroxidase precursor
ACYPI005402-RB RefSeq transcript XM_001946214 PREDICTED: Acyrthosiphon pisum similar to AGAP012395-PA, transcript variant 2 (LOC100164380), mRNA	2.27973	7.6104e-10	ACYPI005402	Peptide methionine sulfoxide reductase MsrA
ACYPI003765-RA RefSeq transcript XM_001948091 PREDICTED: Acyrthosiphon pisum similar to cuticular protein CPG12 (LOC100162620), mRNA	2.27518	1.23171e-14	ACYPI003765
ACYPI002791-RA RefSeq transcript XM_001942778 PREDICTED: Acyrthosiphon pisum similar to AGAP007868-PA (LOC100161579), mRNA	2.2744	5.5993e-15	ACYPI002791	uncharacterized protein
ACYPI009052-RA RefSeq transcript XM_001945931 PREDICTED: Acyrthosiphon pisum similar to CG15117 CG15117-PA (LOC100168343), mRNA	2.27317	7.32221e-18	ACYPI009052	Beta-glucuronidase
ACYPI48255-RA Glean transcript GLEAN_28255	2.27088	5.75017e-20	ACYPI48255
ACYPI42591-RA Glean transcript GLEAN_22591	2.26697	2.87408e-22	ACYPI42591	GA24268
ACYPI22865-RA Glean transcript GLEAN_02865	2.26531	1.81292e-25	ACYPI22865	Kelch-like protein 3
ACYPI49229-RA Glean transcript GLEAN_29229	2.26504	2.36041e-23	ACYPI49229
ACYPI004215-RA RefSeq transcript XM_001943801 PREDICTED: Acyrthosiphon pisum similar to conserved hypothetical protein (LOC100163107), mRNA	2.26387	6.88276e-13
ACYPI009092-RA RefSeq transcript XM_001943972 PREDICTED: Acyrthosiphon pisum similar to metalloprotease (LOC100168386), mRNA	2.26294	9.83401e-23	ACYPI009092
ACYPI008393-RA RefSeq transcript XM_001952510 PREDICTED: Acyrthosiphon pisum similar to CG1688 CG1688-PA (LOC100167612), mRNA	2.26213	9.10989e-10
ACYPI004199-RA RefSeq transcript XM_001947607 PREDICTED: Acyrthosiphon pisum similar to CG31140 CG31140-PC (LOC100163089), mRNA	2.26075	1.85042e-14	ACYPI004199	diacylglycerol kinase theta
ACYPI009779-RA RefSeq transcript XM_001949818 PREDICTED: Acyrthosiphon pisum hypothetical protein LOC100169132 (LOC100169132), mRNA	2.25891	9.68893e-23	ACYPI007904	Pyridoxal-dependent decarboxylase domain-containing protein 1
ACYPI001775-RA RefSeq transcript XM_001951031 PREDICTED: Acyrthosiphon pisum similar to RR1 cuticle protein 2 (LOC100160480), mRNA	2.25806	0.000983409	ACYPI001775	ACYPI001775 protein
ACYPI004808-RA RefSeq transcript XM_001944464 PREDICTED: Acyrthosiphon pisum similar to AGAP005398-PA (LOC100163747), partial mRNA	2.25779	1.99478e-14
ACYPI009852-RA RefSeq transcript XM_001952284 PREDICTED: Acyrthosiphon pisum similar to AGAP005011-PA (LOC100169212), mRNA	2.25672	1.93906e-23	ACYPI009852	Mirror
ACYPI007532-RA RefSeq transcript XM_001948956 PREDICTED: Acyrthosiphon pisum similar to proteophosphoglycan ppg1 (LOC100166678), mRNA	2.25568	1.22555e-17	ACYPI007532	proteophosphoglycan ppg1
ACYPI002191-RA RefSeq transcript XM_001946671 PREDICTED: Acyrthosiphon pisum similar to Actin-related protein 8 CG7846-PA (LOC100160925), mRNA	2.25294	4.80671e-10	ACYPI002191	uncharacterized protein
ACYPI004679-RA RefSeq transcript XM_001947012 PREDICTED: Acyrthosiphon pisum similar to LOC733210 protein (LOC100163604), mRNA	2.25188	6.7074e-08
ACYPI009344-RA RefSeq transcript XM_001952370 PREDICTED: Acyrthosiphon pisum similar to AGAP003704-PA (LOC100168664), mRNA	2.24932	7.44769e-19	ACYPI009344	LD41392p
ACYPI26569-RA Glean transcript GLEAN_06569	2.2485	1.84185e-13
ACYPI002047-RA RefSeq transcript XM_001943548 PREDICTED: Acyrthosiphon pisum similar to sodium/solute symporter (LOC100160776), mRNA	2.24847	3.44619e-15	ACYPI002047
ACYPI009812-RA RefSeq transcript XM_001946376 PREDICTED: Acyrthosiphon pisum similar to GA21525-PA (LOC100169171), mRNA	2.24837	7.11664e-06	ACYPI066082	Endocuticle structural glycoprotein ABD-4
ACYPI003083-RA RefSeq transcript XM_001949851 PREDICTED: Acyrthosiphon pisum similar to Tripeptidyl-peptidase 2 (Tripeptidyl-peptidase II) (TPP-II) (Tripeptidyl aminopeptidase) (LOC100161895), partial mRNA	2.24406	1.44325e-14	ACYPI003083
ACYPI004536-RA RefSeq transcript XM_001947427 PREDICTED: Acyrthosiphon pisum similar to orcokinin precursor 4 (LOC100163447), mRNA	2.24374	3.53257e-14	ACYPI004536	orcokinin precursor 4
ACYPI33577-RA Glean transcript GLEAN_13577	2.23999	1.02237e-27	ACYPI33577
ACYPI53117-RA Glean transcript GLEAN_33117	2.23963	1.21599e-26	ACYPI004955
ACYPI26976-RA Glean transcript GLEAN_06976	2.23473	5.28375e-25	ACYPI26976	uncharacterized protein
ACYPI008206-RA RefSeq transcript XM_001949634 PREDICTED: Acyrthosiphon pisum similar to CG31663 CG31663-PA (LOC100167407), partial mRNA	2.23443	0.000224155	ACYPI25540	AGAP010048-PA
ACYPI001903-RA RefSeq transcript XM_001945659 PREDICTED: Acyrthosiphon pisum similar to T-box protein Tbx1 (LOC100160619), mRNA	2.22893	7.57819e-10	ACYPI001903
ACYPI24972-RA Glean transcript GLEAN_04972	2.22813	3.48638e-20
ACYPI50555-RA Glean transcript GLEAN_30555	2.22263	5.75017e-20	ACYPI50555
ACYPI34905-RA Glean transcript GLEAN_14905	2.22125	1.33343e-27	ACYPI34905
ACYPI31983-RA Glean transcript GLEAN_11983	2.22104	1.03846e-22
ACYPI004563-RA RefSeq transcript XM_001945034 PREDICTED: Acyrthosiphon pisum similar to GA21779-PA (LOC100163476), mRNA	2.21771	0.000158877	ACYPI004563
ACYPI40549-RA Glean transcript GLEAN_20549	2.21665	2.20458e-23	ACYPI40549
ACYPI006059-RA RefSeq transcript XM_001944232 PREDICTED: Acyrthosiphon pisum similar to AGAP004159-PA (LOC100165091), mRNA	2.21043	9.51641e-15	ACYPI006059
ACYPI41167-RA Glean transcript GLEAN_21167	2.2088	8.82782e-24	ACYPI41167	uncharacterized protein
ACYPI008554-RA RefSeq transcript XM_001949103 PREDICTED: Acyrthosiphon pisum similar to NK7.1 CG8524-PA (LOC100167793), partial mRNA	2.20495	1.61485e-11
ACYPI40354-RA Glean transcript GLEAN_20354	2.20343	2.9024e-22
ACYPI004815-RA RefSeq transcript XM_001944558 PREDICTED: Acyrthosiphon pisum similar to CG7509 CG7509-PA (LOC100163755), mRNA	2.20342	1.02343e-10	ACYPI004815	Tartan/capricious-like protein
ACYPI008195-RA RefSeq transcript XM_001943663 PREDICTED: Acyrthosiphon pisum similar to NADPH-specific isocitrate dehydrogenase (LOC100167396), mRNA	2.19983	2.7746e-19	ACYPI008195
ACYPI27428-RA Glean transcript GLEAN_07428	2.19816	2.66236e-16	ACYPI27428
ACYPI003823-RA RefSeq transcript XM_001949340 PREDICTED: Acyrthosiphon pisum similar to inositol polyphosphate 1-phosphatase (LOC100162683), mRNA	2.19621	1.79621e-13	ACYPI003823	Inositol polyphosphate 1-phosphatase
ACYPI007329-RA RefSeq transcript XM_001947902 PREDICTED: Acyrthosiphon pisum similar to cuticular protein (LOC100166461), mRNA	2.19447	1.58942e-20	ACYPI007329	Cuticle protein
ACYPI004184-RA RefSeq transcript XM_001949002 PREDICTED: Acyrthosiphon pisum similar to amino acid transporter (LOC100163073), mRNA	2.19439	3.52844e-08	ACYPI004184
ACYPI005433-RA RefSeq transcript XM_001945777 PREDICTED: Acyrthosiphon pisum similar to vacuolar protein sorting (LOC100164414), mRNA	2.19329	4.40695e-11	ACYPI005433	Vacuolar protein sorting
ACYPI004543-RA RefSeq transcript XM_001951051 PREDICTED: Acyrthosiphon pisum similar to dab2-interacting protein (LOC100163454), mRNA	2.19243	4.24244e-12	ACYPI004543	dab2-interacting protein
ACYPI005781-RA RefSeq transcript XM_001951312 PREDICTED: Acyrthosiphon pisum hypothetical protein LOC100164794 (LOC100164794), mRNA	2.19184	2.93185e-12	ACYPI005781	uncharacterized protein
ACYPI20417-RA Glean transcript GLEAN_00417	2.19018	3.74849e-16	ACYPI20417	uncharacterized protein
ACYPI000443-RA RefSeq transcript XM_001944662 PREDICTED: Acyrthosiphon pisum similar to sodium/hydrogen exchanger 8 (LOC100159032), mRNA	2.18345	2.81653e-07	ACYPI000443	Sodium/hydrogen exchanger
ACYPI29994-RA Glean transcript GLEAN_09994	2.18052	2.72462e-21	ACYPI29994	uncharacterized protein
ACYPI34261-RA Glean transcript GLEAN_14261	2.17793	5.72152e-19	ACYPI34261
ACYPI007493-RA RefSeq transcript XM_001949929 PREDICTED: Acyrthosiphon pisum similar to biphenyl hydrolase-like (serine hydrolase, breast epithelial mucin-associated antigen) (LOC100166637), mRNA	2.17727	0.000248647	ACYPI006588	Tolloid-like protein 2
ACYPI000113-RA RefSeq transcript XM_001946910 PREDICTED: Acyrthosiphon pisum similar to glucose dehydrogenase (LOC100158673), partial mRNA	2.17515	6.35684e-14	ACYPI000113	RE11240p
ACYPI003487-RA RefSeq transcript XM_001949016 PREDICTED: Acyrthosiphon pisum similar to sodium/solute symporter (LOC100162329), mRNA	2.17505	4.17525e-06	ACYPI003487
ACYPI003950-RA RefSeq transcript XM_001952133 PREDICTED: Acyrthosiphon pisum similar to phosphodiesterase 11A (LOC100162827), mRNA	2.17359	7.31246e-09	ACYPI003950
ACYPI009569-RA RefSeq transcript XM_001945299 PREDICTED: Acyrthosiphon pisum similar to CG4395 CG4395-PA (LOC100168906), partial mRNA	2.17203	2.87526e-24	ACYPI009569	diuretic insect hormone receptor
ACYPI41981-RA Glean transcript GLEAN_21981	2.17138	1.13791e-24	ACYPI41981	uncharacterized protein
ACYPI25045-RA Glean transcript GLEAN_05045	2.16678	3.19424e-18	ACYPI25045	uncharacterized protein
ACYPI27616-RA Glean transcript GLEAN_07616	2.16597	9.51281e-19	ACYPI27616
ACYPI001830-RA RefSeq transcript XM_001945630 PREDICTED: Acyrthosiphon pisum similar to CG12512 CG12512-PA (LOC100160541), mRNA	2.1659	1.62337e-16	ACYPI001830
ACYPI37616-RA Glean transcript GLEAN_17616	2.16198	2.1929e-19	ACYPI37616	uncharacterized protein
ACYPI005463-RA RefSeq transcript XM_001949450 PREDICTED: Acyrthosiphon pisum similar to AGAP010734-PA (LOC100164444), partial mRNA	2.15873	6.80863e-09	ACYPI005463	chorion peroxidase precursor
ACYPI51153-RA Glean transcript GLEAN_31153	2.15709	5.04398e-19
ACYPI006099-RA RefSeq transcript XM_001952298 PREDICTED: Acyrthosiphon pisum similar to cuticle protein (LOC100165136), mRNA	2.15549	2.12587e-07
ACYPI004081-RA RefSeq transcript XM_001945216 PREDICTED: Acyrthosiphon pisum similar to AGAP012154-PA (LOC100162963), partial mRNA	2.15524	3.6187e-13	ACYPI004081
ACYPI55115-RA Glean transcript GLEAN_35115	2.15435	3.48974e-22
ACYPI002050-RA RefSeq transcript XM_001943583 PREDICTED: Acyrthosiphon pisum similar to tweety CG1693-PA (LOC100160779), mRNA	2.15163	2.89319e-08	ACYPI002050
ACYPI009947-RA RefSeq transcript XM_001947018 PREDICTED: Acyrthosiphon pisum similar to AGAP001485-PA (LOC100169318), mRNA	2.15021	4.82199e-16	ACYPI009947	uncharacterized protein
ACYPI004638-RA RefSeq transcript XM_001951623 PREDICTED: Acyrthosiphon pisum similar to osiris 9 (LOC100163560), mRNA	2.14978	1.22273e-20	ACYPI004638
ACYPI005474-RA RefSeq transcript XM_001952248 PREDICTED: Acyrthosiphon pisum similar to neuropeptide Y receptor type 2 (LOC100164456), partial mRNA	2.14801	2.71908e-13	ACYPI005474	Short neuropeptide F receptor
ACYPI009131-RA RefSeq transcript XM_001945287 PREDICTED: Acyrthosiphon pisum similar to trypsin-like protein (LOC100168430), mRNA	2.14651	8.02392e-19	ACYPI009131	Serine proteinase
ACYPI008694-RA RefSeq transcript XM_001945222 PREDICTED: Acyrthosiphon pisum similar to putative cuticular protein (LOC100167948), mRNA	2.14648	6.16824e-12	ACYPI008694
ACYPI002410-RA RefSeq transcript XM_001948136 PREDICTED: Acyrthosiphon pisum similar to CG31886 CG31886-PB (LOC100161167), mRNA	2.14136	4.7096e-06	ACYPI002410
ACYPI20372-RA Glean transcript GLEAN_00372	2.13951	2.45301e-19	ACYPI20372
ACYPI42801-RA Glean transcript GLEAN_22801	2.13824	7.04019e-24	ACYPI42801
ACYPI001809-RA RefSeq transcript XM_001952292 PREDICTED: Acyrthosiphon pisum similar to senseless-2 CG31632-PA (LOC100160519), mRNA	2.13703	1.7689e-09	ACYPI001809
ACYPI26961-RA Glean transcript GLEAN_06961	2.13344	4.09178e-21
ACYPI000094-RA RefSeq transcript NM_001126178 gi|187123201|ref|NM_001126178.1 Acyrthosiphon pisum chemosensory protein-like (LOC100145852), mRNA	2.1321	5.13823e-06	ACYPI000094	uncharacterized protein
ACYPI003587-RA RefSeq transcript XM_001952274 PREDICTED: Acyrthosiphon pisum hypothetical protein LOC100162435 (LOC100162435), mRNA	2.12934	2.59963e-12	ACYPI082566	uncharacterized protein
ACYPI38431-RA Glean transcript GLEAN_18431	2.12414	4.75651e-24	ACYPI38431	alpha-amylase
ACYPI003038-RA RefSeq transcript XM_001944172 PREDICTED: Acyrthosiphon pisum similar to dimethylaniline monooxygenase (LOC100161845), mRNA	2.11703	1.08308e-13	ACYPI003038
ACYPI000364-RA RefSeq transcript XM_001943044 PREDICTED: Acyrthosiphon pisum hypothetical protein LOC100158947 (LOC100158947), mRNA	2.11561	4.31067e-05	ACYPI000364	uncharacterized protein
ACYPI004227-RA RefSeq transcript XM_001948500 PREDICTED: Acyrthosiphon pisum hypothetical protein LOC100163120 (LOC100163120), mRNA	2.11519	3.0409e-13	ACYPI004227
ACYPI36534-RA Glean transcript GLEAN_16534	2.11474	4.28543e-28	ACYPI36534	uncharacterized protein
ACYPI002760-RA RefSeq transcript XM_001945257 PREDICTED: Acyrthosiphon pisum similar to Cytosolic carboxypeptidase 1 (ATP/GTP-binding protein 1) (Nervous system nuclear protein induced by axotomy) (LOC100161544), mRNA	2.11319	5.75139e-09	ACYPI009750	uncharacterized protein
ACYPI49495-RA Glean transcript GLEAN_29495	2.11201	3.27157e-30
ACYPI002094-RA RefSeq transcript XM_001944682 PREDICTED: Acyrthosiphon pisum similar to tissue-nonspecific alkaline phosphatase (LOC100160823), partial mRNA	2.11193	2.81792e-08	ACYPI002094	tissue-nonspecific alkaline phosphatase
ACYPI003036-RA RefSeq transcript XM_001945875 PREDICTED: Acyrthosiphon pisum similar to CG32791 CG32791-PA (LOC100161843), partial mRNA	2.10929	2.00404e-09	ACYPI003036	CG32791
ACYPI005676-RA RefSeq transcript XM_001944236 PREDICTED: Acyrthosiphon pisum similar to exostoses (multiple) 2 (LOC100164685), mRNA	2.10584	2.01197e-10	ACYPI005676
ACYPI007782-RA RefSeq transcript XM_001951038 PREDICTED: Acyrthosiphon pisum similar to cuticular protein CPG12 (LOC100166950), mRNA	2.10577	4.17926e-23	ACYPI007782
ACYPI49595-RA Glean transcript GLEAN_29595	2.10473	2.28595e-22	ACYPI49595
ACYPI008310-RA RefSeq transcript XM_001948588 PREDICTED: Acyrthosiphon pisum similar to predicted protein (LOC100167516), mRNA	2.10268	2.68794e-13	ACYPI008310
ACYPI002240-RA RefSeq transcript XM_001942553 PREDICTED: Acyrthosiphon pisum similar to coronin (LOC100160980), mRNA	2.10228	8.1696e-09	ACYPI002240	coro
ACYPI003089-RA RefSeq transcript XM_001948783 PREDICTED: Acyrthosiphon pisum hypothetical protein LOC100161901 (LOC100161901), partial mRNA	2.10046	1.36022e-09	ACYPI003089	drosmel_CG7709-PA
ACYPI009370-RA RefSeq transcript XM_001943361 PREDICTED: Acyrthosiphon pisum similar to galactose-1-phosphate uridylyltransferase (LOC100168691), mRNA	2.09601	1.21875e-13	ACYPI009370
ACYPI40806-RA Glean transcript GLEAN_20806	2.09561	3.02826e-24	ACYPI40806	Uncharacterized protein ZK1236.4
ACYPI003494-RA RefSeq transcript XM_001949719 PREDICTED: Acyrthosiphon pisum hypothetical protein LOC100162337 (LOC100162337), mRNA	2.09196	3.34222e-10	ACYPI003494	uncharacterized protein
ACYPI49139-RA Glean transcript GLEAN_29139	2.09119	6.4977e-27	ACYPI49139	uncharacterized protein
ACYPI33281-RA Glean transcript GLEAN_13281	2.09116	2.45427e-15	ACYPI33281	TGF-alpha
ACYPI009279-RA RefSeq transcript XM_001944410 PREDICTED: Acyrthosiphon pisum similar to AGAP008082-PA (LOC100168594), mRNA	2.08948	1.27623e-20	ACYPI009279
ACYPI38432-RA Glean transcript GLEAN_18432	2.08815	6.83134e-24
ACYPI006710-RA RefSeq transcript XM_001942598 PREDICTED: Acyrthosiphon pisum similar to multi PDZ domain protein 1 (LOC100165785), mRNA	2.08658	1.33811e-06
ACYPI008147-RA RefSeq transcript XM_001943345 PREDICTED: Acyrthosiphon pisum similar to conserved hypothetical protein (LOC100167345), mRNA	2.08135	2.78279e-13	ACYPI008147	CG10311
ACYPI001599-RA RefSeq transcript XM_001946410 PREDICTED: Acyrthosiphon pisum similar to cuticular protein (LOC100160292), mRNA	2.07966	6.53333e-08	ACYPI001599	Cuticle protein
ACYPI21415-RA Glean transcript GLEAN_01415	2.0781	1.50815e-22	ACYPI21414
ACYPI002498-RA RefSeq transcript XM_001949571 PREDICTED: Acyrthosiphon pisum similar to AGAP000885-PA (LOC100161264), partial mRNA	2.07591	2.50039e-09
ACYPI41139-RA Glean transcript GLEAN_21139	2.07577	3.54565e-24	ACYPI41139	Group 3 secretory phospholipase A2
ACYPI32634-RA Glean transcript GLEAN_12634	2.07387	2.57675e-26	ACYPI32634	Limulus clotting factor C
ACYPI46527-RA Glean transcript GLEAN_26527	2.07362	8.40148e-27	ACYPI46527
ACYPI002464-RA RefSeq transcript XM_001945807 PREDICTED: Acyrthosiphon pisum similar to AGAP007029-PA (LOC100161224), partial mRNA	2.0683	5.04804e-12	ACYPI002464	glucosyl/glucuronosyl transferases
ACYPI007343-RA RefSeq transcript XM_001946640 PREDICTED: Acyrthosiphon pisum similar to general transcription factor 3C polypeptide 3 (LOC100166475), mRNA	2.06688	3.89541e-10	ACYPI007343
ACYPI001346-RA RefSeq transcript XM_001949402 PREDICTED: Acyrthosiphon pisum hypothetical protein LOC100160012 (LOC100160012), mRNA	2.05624	6.19436e-06	ACYPI001346
ACYPI43471-RA Glean transcript GLEAN_23471	2.05546	4.97836e-29
ACYPI53725-RA Glean transcript GLEAN_33725	2.05538	2.0824e-27	ACYPI53725	52 kDa repressor of the inhibitor of the protein kinase
ACYPI005122-RA RefSeq transcript XM_001942928 PREDICTED: Acyrthosiphon pisum similar to conserved hypothetical protein (LOC100164081), mRNA	2.05427	3.71513e-19	ACYPI005122
ACYPI006134-RA RefSeq transcript XM_001951660 PREDICTED: Acyrthosiphon pisum hypothetical protein LOC100165172 (LOC100165172), partial mRNA	2.04943	9.28785e-14	ACYPI006134	uncharacterized protein
ACYPI008040-RA RefSeq transcript XM_001942822 PREDICTED: Acyrthosiphon pisum similar to clathrin coat assembly protein (LOC100167229), mRNA	2.04764	7.52734e-14	ACYPI068713
ACYPI005543-RA RefSeq transcript XM_001951812 PREDICTED: Acyrthosiphon pisum similar to CG10830 CG10830-PA (LOC100164534), mRNA	2.04726	1.16112e-14	ACYPI005543
ACYPI000206-RA RefSeq transcript XM_001952780 PREDICTED: Acyrthosiphon pisum similar to AGAP002586-PA (LOC100158771), partial mRNA	2.04594	8.70556e-13	ACYPI000206
ACYPI39956-RA Glean transcript GLEAN_19956	2.04551	2.14618e-17	ACYPI39956	Gag protein
ACYPI001814-RA RefSeq transcript XM_001945199 PREDICTED: Acyrthosiphon pisum similar to conserved hypothetical protein (LOC100160525), mRNA	2.04533	1.72574e-11	ACYPI001814	Limulus clotting factor C
ACYPI40807-RA Glean transcript GLEAN_20807	2.04192	3.48173e-15	ACYPI40807
ACYPI51025-RA Glean transcript GLEAN_31025	2.04085	9.88003e-26
ACYPI008541-RA RefSeq transcript XM_001943760 PREDICTED: Acyrthosiphon pisum similar to AGAP010274-PA (LOC100167776), partial mRNA	2.0367	1.78232e-18	ACYPI008541	PP2C-like domain-containing protein CG9801
ACYPI007040-RA RefSeq transcript XM_001952805 PREDICTED: Acyrthosiphon pisum similar to AGAP012139-PA (LOC100166141), mRNA	2.03504	1.72852e-12	ACYPI007040
ACYPI38071-RA Glean transcript GLEAN_18071	2.03194	4.16688e-20	ACYPI38071
ACYPI002818-RA RefSeq transcript XM_001944800 PREDICTED: Acyrthosiphon pisum hypothetical protein LOC100161607 (LOC100161607), mRNA	2.03068	2.69989e-15	ACYPI002818
ACYPI004405-RA RefSeq transcript XM_001942956 PREDICTED: Acyrthosiphon pisum similar to CG3822 CG3822-PA (LOC100163311), mRNA	2.03	2.08256e-18
ACYPI004609-RA RefSeq transcript XM_001945241 PREDICTED: Acyrthosiphon pisum similar to Synapsin CG3985-PC (LOC100163525), mRNA	2.02771	1.16662e-13	ACYPI004609
ACYPI002630-RA RefSeq transcript XM_001947702 PREDICTED: Acyrthosiphon pisum similar to conserved hypothetical protein (LOC100161409), mRNA	2.02616	9.94356e-08	ACYPI002630
ACYPI009854-RA RefSeq transcript XM_001947756 PREDICTED: Acyrthosiphon pisum similar to angiotensin-converting-relatedenzyme (LOC100169214), mRNA	2.02403	1.02654e-19	ACYPI007796
ACYPI009770-RA RefSeq transcript XM_001952739 PREDICTED: Acyrthosiphon pisum similar to GA17761-PA (LOC100169123), partial mRNA	2.02304	1.17649e-19	ACYPI002372
ACYPI002576-RA RefSeq transcript XM_001948121 PREDICTED: Acyrthosiphon pisum similar to CG32441 CG32441-PB, transcript variant 1 (LOC100161347), mRNA	2.02271	7.53143e-05
ACYPI39047-RA Glean transcript GLEAN_19047	2.0225	8.78805e-22
ACYPI007125-RA RefSeq transcript XM_001947606 PREDICTED: Acyrthosiphon pisum similar to RAB18B, member RAS oncogene family (LOC100166239), mRNA	2.02176	4.69499e-17	ACYPI087879	gtp-binding nuclear protein ran1
ACYPI009264-RA RefSeq transcript XM_001945857 PREDICTED: Acyrthosiphon pisum similar to wurst CG9089-PA (LOC100168578), mRNA	2.01984	1.13667e-20	ACYPI009264
ACYPI005486-RA RefSeq transcript XM_001943368 PREDICTED: Acyrthosiphon pisum similar to CG14521 CG14521-PA (LOC100164469), mRNA	2.01764	2.59728e-10	ACYPI005486	defective proboscis extension response
ACYPI006578-RA RefSeq transcript XM_001943039 PREDICTED: Acyrthosiphon pisum similar to sugar transporter (LOC100165645), mRNA	2.01698	3.14575e-12	ACYPI006578
ACYPI54603-RA Glean transcript GLEAN_34603	2.01643	5.00737e-26
ACYPI001080-RA RefSeq transcript XM_001944692 PREDICTED: Acyrthosiphon pisum similar to dusky-like CG15013-PA (LOC100159731), mRNA	2.01109	7.04471e-09	ACYPI001080	dusky-like
ACYPI46072-RA Glean transcript GLEAN_26072	2.00949	4.65974e-16	ACYPI53725	52 kDa repressor of the inhibitor of the protein kinase
ACYPI44832-RA Glean transcript GLEAN_24832	2.00844	2.08459e-28	ACYPI20759	Inhibin beta chain
ACYPI007169-RA RefSeq transcript XM_001950209 PREDICTED: Acyrthosiphon pisum similar to conserved hypothetical protein (LOC100166286), mRNA	2.00765	4.53092e-09	ACYPI007169
ACYPI22605-RA Glean transcript GLEAN_02605	2.00712	2.22484e-17	ACYPI22605	aminopeptidase 1-like
ACYPI004921-RA RefSeq transcript XM_001943404 PREDICTED: Acyrthosiphon pisum hypothetical protein LOC100163867 (LOC100163867), mRNA	2.00692	1.82111e-12	ACYPI004921	uncharacterized protein
ACYPI40493-RA Glean transcript GLEAN_20493	2.00148	8.1109e-26	ACYPI40493	THO complex subunit 1
ACYPI000323-RA RefSeq transcript XM_001947561 PREDICTED: Acyrthosiphon pisum similar to rCG22895 (LOC100158903), partial mRNA	2.00023	6.14036e-09	ACYPI000323	otu domain-containing protein
ACYPI48957-RA Glean transcript GLEAN_28957	2.00013	6.29294e-19	ACYPI48957	Limulus clotting factor C

## Sheet: Bacteriocytes
Table S4. List of bacteriocytes-enriched genes. Genes were considered as being tissue-specific using a four-fold change threshold in the bacteriocyte/gut contrast.
ACYPI V1	log2(Fold-Change) bacteriocytes > gut	Adjusted P-value	ACYPI V2.1c	Product
ACYPI26791-RA Glean transcript GLEAN_06791	5.95868	2.02554e-19	ACYPI26791	uncharacterized protein
ACYPI21924-RA Glean transcript GLEAN_01924	5.86105	1.9584e-18	ACYPI21924	uncharacterized protein
ACYPI54224-RA Glean transcript GLEAN_34224	5.66159	1.26687e-19	ACYPI54224	uncharacterized protein
ACYPI004430-RA RefSeq transcript XM_001951968 PREDICTED: Acyrthosiphon pisum similar to beat protein (LOC100163336), mRNA	5.54332	1.99967e-21	ACYPI004430
ACYPI003822-RA RefSeq transcript XM_001944366 PREDICTED: Acyrthosiphon pisum similar to AGAP002331-PA (LOC100162682), mRNA	5.49543	1.04211e-23	ACYPI003822	sulfate transporter
ACYPI000963-RA RefSeq transcript XM_001943977 PREDICTED: Acyrthosiphon pisum similar to Retinal homeobox protein Rx (DRx1) (DRx) (LOC100159606), mRNA	5.4825	9.95208e-18	ACYPI000963	Retinal homeobox
ACYPI008436-RA RefSeq transcript XM_001942676 PREDICTED: Acyrthosiphon pisum similar to AGAP001236-PA (LOC100167659), mRNA	5.38018	1.52222e-17	ACYPI008436	Sugar transporter 7
ACYPI48621-RA Glean transcript GLEAN_28621	5.36918	4.09634e-18	ACYPI48621	uncharacterized protein
ACYPI006152-RA RefSeq transcript XM_001943457 PREDICTED: Acyrthosiphon pisum hypothetical protein LOC100165191 (LOC100165191), mRNA	5.33067	7.46431e-23	ACYPI006152
ACYPI33056-RA Glean transcript GLEAN_13056	5.21564	1.10505e-16	ACYPI33056	uncharacterized protein
ACYPI001008-RA RefSeq transcript XM_001943281 PREDICTED: Acyrthosiphon pisum similar to carboxypeptidase, vitellogenic-like (LOC100159655), mRNA	5.21399	1.581e-18	ACYPI001008	serine carboxypeptidase
ACYPI001102-RA RefSeq transcript XM_001949795 PREDICTED: Acyrthosiphon pisum similar to CG10407 CG10407-PA (LOC100159753), mRNA	5.16844	1.6543e-10	ACYPI001102
ACYPI27813-RA Glean transcript GLEAN_07813	5.16796	4.24204e-20	ACYPI27813
ACYPI007044-RA RefSeq transcript XM_001951244 PREDICTED: Acyrthosiphon pisum similar to Dyslexia susceptibility 1 candidate gene 1 protein (LOC100166145), mRNA	5.16586	4.55459e-22	ACYPI007044
ACYPI007008-RA RefSeq transcript XM_001951581 PREDICTED: Acyrthosiphon pisum similar to salivary gland-expressed bHLH, putative (LOC100166107), mRNA	5.13787	6.78216e-20	ACYPI007008
ACYPI000392-RA RefSeq transcript XM_001943596 PREDICTED: Acyrthosiphon pisum similar to trypsin-like protein (LOC100158977), mRNA	5.04354	1.12706e-15	ACYPI000392	Serine proteinase
ACYPI006357-RA RefSeq transcript XM_001950781 PREDICTED: Acyrthosiphon pisum similar to CG9706 CG9706-PA (LOC100165404), mRNA	5.03113	8.76488e-19	ACYPI006357	acetyl-coenzyme a transporter
ACYPI001114-RA RefSeq transcript XM_001949927 PREDICTED: Acyrthosiphon pisum similar to BEL12_AG transposon polyprotein (LOC100159765), mRNA	4.96153	6.94934e-16	ACYPI001114	BEL12_AG transposon polyprotein
ACYPI41807-RA Glean transcript GLEAN_21807	4.95983	4.04802e-17
ACYPI53885-RA Glean transcript GLEAN_33885	4.9292	1.49249e-15	ACYPI53885
ACYPI45495-RA Glean transcript GLEAN_25495	4.92473	8.83052e-15	ACYPI45495
ACYPI42888-RA Glean transcript GLEAN_22888	4.9206	4.25072e-19	ACYPI42888
ACYPI48598-RA Glean transcript GLEAN_28598	4.91439	6.51952e-14	ACYPI48598
ACYPI42938-RA Glean transcript GLEAN_22938	4.90582	6.32494e-18	ACYPI47442	ORF2 for putative reverse transcriptase
ACYPI26915-RA Glean transcript GLEAN_06915	4.90003	2.33568e-15	ACYPI26915
ACYPI004920-RA RefSeq transcript XM_001948539 PREDICTED: Acyrthosiphon pisum similar to bombesin receptor subtype-3 (LOC100163866), mRNA	4.8767	1.46483e-17	ACYPI004920
ACYPI002024-RA RefSeq transcript XM_001944928 PREDICTED: Acyrthosiphon pisum similar to CG18549 CG18549-PA (LOC100160753), mRNA	4.85478	1.75082e-17	ACYPI002024
ACYPI27286-RA Glean transcript GLEAN_07286	4.83708	3.51875e-21	ACYPI27286
ACYPI38879-RA Glean transcript GLEAN_18879	4.82945	7.81474e-16	ACYPI38879	uncharacterized protein
ACYPI002921-RA RefSeq transcript XM_001951135 PREDICTED: Acyrthosiphon pisum hypothetical protein LOC100161721 (LOC100161721), mRNA	4.81209	1.31163e-16	ACYPI002921
ACYPI004438-RA RefSeq transcript XM_001950810 PREDICTED: Acyrthosiphon pisum similar to conserved hypothetical protein (LOC100163344), mRNA	4.79134	2.25492e-15	ACYPI004438	acetyl-coenzyme a transporter
ACYPI002278-RA RefSeq transcript XM_001948518 PREDICTED: Acyrthosiphon pisum similar to AGAP007484-PA (LOC100161021), mRNA	4.78518	8.50946e-16	ACYPI002278	Sugar transporter 14
ACYPI001834-RA RefSeq transcript XM_001943922 PREDICTED: Acyrthosiphon pisum similar to conserved hypothetical protein (LOC100160545), mRNA	4.77836	4.40234e-23	ACYPI001834
ACYPI001524-RA RefSeq transcript XM_001945763 PREDICTED: Acyrthosiphon pisum similar to viral A-type inclusion protein, putative (LOC100160209), mRNA	4.7627	5.78696e-18	ACYPI001524
ACYPI005073-RA RefSeq transcript XM_001946627 PREDICTED: Acyrthosiphon pisum similar to candidate tumor suppressor protein (LOC100164029), mRNA	4.74971	3.69277e-19	ACYPI005073
ACYPI21666-RA Glean transcript GLEAN_01666	4.74565	7.93878e-20	ACYPI21666	pancreatic triacylglycerol lipase
ACYPI000346-RA RefSeq transcript XM_001944531 PREDICTED: Acyrthosiphon pisum similar to MRAS2, putative (LOC100158929), mRNA	4.70323	7.28543e-19	ACYPI000346
ACYPI006024-RA RefSeq transcript XM_001943447 PREDICTED: Acyrthosiphon pisum similar to alkaline phosphatase (LOC100165053), mRNA	4.68613	7.27119e-17	ACYPI006024
ACYPI39148-RA Glean transcript GLEAN_19148	4.66049	5.2301e-17	ACYPI39148	uncharacterized protein
ACYPI006887-RA RefSeq transcript XM_001944752 PREDICTED: Acyrthosiphon pisum similar to 46 kDa salivary protein (LOC100165977), mRNA	4.64977	3.08907e-15	ACYPI006887
ACYPI009358-RA RefSeq transcript XM_001946812 PREDICTED: Acyrthosiphon pisum similar to Neprilysin 1 CG5905-PA (LOC100168678), mRNA	4.64515	3.21387e-18	ACYPI009358
ACYPI005800-RA RefSeq transcript XM_001950746 PREDICTED: Acyrthosiphon pisum similar to Sug CG7334-PA (LOC100164813), partial mRNA	4.64262	1.94327e-16	ACYPI005800
ACYPI36671-RA Glean transcript GLEAN_16671	4.62574	7.28543e-19
ACYPI009112-RA RefSeq transcript XM_001948847 PREDICTED: Acyrthosiphon pisum similar to ribonuclease p/mrp subunit (LOC100168408), mRNA	4.59662	5.17827e-18	ACYPI009112
ACYPI007338-RA RefSeq transcript XM_001944807 PREDICTED: Acyrthosiphon pisum similar to putative diuretic hormone receptor II (LOC100166470), mRNA	4.5743	8.43025e-16	ACYPI007338
ACYPI004685-RA RefSeq transcript XM_001945365 PREDICTED: Acyrthosiphon pisum similar to SD08430p (LOC100163610), mRNA	4.54271	3.60166e-21	ACYPI004685	Acetyl-coenzyme A transporter 1
ACYPI39451-RA Glean transcript GLEAN_19451	4.53617	4.8102e-24	ACYPI008304	Beta-hexosaminidase subunit beta
ACYPI001751-RA RefSeq transcript XM_001947337 PREDICTED: Acyrthosiphon pisum similar to lots wife CG33968-PA (LOC100160455), mRNA	4.51117	8.00082e-16	ACYPI001751
ACYPI004403-RA RefSeq transcript XM_001944729 PREDICTED: Acyrthosiphon pisum similar to protease m1 zinc metalloprotease (LOC100163309), mRNA	4.4954	7.93365e-19
ACYPI009427-RA RefSeq transcript XM_001950011 PREDICTED: Acyrthosiphon pisum similar to protease m1 zinc metalloprotease (LOC100168750), mRNA	4.47641	2.92798e-18	ACYPI071951
ACYPI000297-RA RefSeq transcript XM_001945992 PREDICTED: Acyrthosiphon pisum similar to CLIP-domain serine protease subfamily C (AGAP008835-PA) (LOC100158876), mRNA	4.4494	4.93336e-15	ACYPI000297	Serine protease
ACYPI004260-RA RefSeq transcript XM_001952514 PREDICTED: Acyrthosiphon pisum similar to CG7627 CG7627-PA (LOC100163156), partial mRNA	4.41125	3.30648e-23	ACYPI002363	multidrug resistance protein 2 atp-binding cassette protein c
ACYPI20246-RA Glean transcript GLEAN_00246	4.39242	3.39135e-18	ACYPI007044
ACYPI49491-RA Glean transcript GLEAN_29491	4.38285	2.95772e-16	ACYPI49491
ACYPI008904-RA RefSeq transcript XM_001946239 PREDICTED: Acyrthosiphon pisum similar to cationic amino acid transporter (LOC100168178), mRNA	4.37986	6.96821e-13	ACYPI008904	Low affinity cationic amino acid transporter 2
ACYPI003904-RA RefSeq transcript XM_001946273 PREDICTED: Acyrthosiphon pisum similar to AGAP010241-PA (LOC100162774), mRNA	4.37322	7.70149e-14	ACYPI003904
ACYPI49160-RA Glean transcript GLEAN_29160	4.36365	1.29095e-12	ACYPI43313
ACYPI000858-RA RefSeq transcript XM_001948349 PREDICTED: Acyrthosiphon pisum similar to serine/threonine protein kinase death domain protein, pelle-like (AGAP002966-PA) (LOC100159492), partial mRNA	4.3634	4.93617e-15	ACYPI000858	interleukin-1 receptor-associated kinase
ACYPI010105-RA RefSeq transcript XM_001944947 PREDICTED: Acyrthosiphon pisum similar to acetyl-coenzyme A transporter (LOC100169490), mRNA	4.35099	3.90112e-14	ACYPI010105	acetyl-coenzyme a transporter
ACYPI31621-RA Glean transcript GLEAN_11621	4.34511	7.69952e-15
ACYPI30518-RA Glean transcript GLEAN_10518	4.34482	4.00691e-19	ACYPI32749	Abhydrolase domain-containing protein 12
ACYPI010074-RA RefSeq transcript XM_001950311 PREDICTED: Acyrthosiphon pisum similar to sugar transporter (LOC100169458), mRNA	4.33804	1.7027e-10	ACYPI010074
ACYPI001203-RA RefSeq transcript XM_001949976 PREDICTED: Acyrthosiphon pisum similar to AGAP000885-PA (LOC100159862), mRNA	4.31364	9.57503e-16	ACYPI001203
ACYPI004296-RA RefSeq transcript XM_001947802 PREDICTED: Acyrthosiphon pisum similar to alanine-glyoxylate aminotransferase (LOC100163196), mRNA	4.29356	1.44695e-14	ACYPI062587
ACYPI23348-RA Glean transcript GLEAN_03348	4.29178	2.90068e-12	ACYPI23348	uncharacterized protein
ACYPI002886-RA RefSeq transcript XM_001946279 PREDICTED: Acyrthosiphon pisum similar to putative neuropeptide Y receptor 1 (AGAP000351-PB) (LOC100161684), mRNA	4.29114	6.09717e-16	ACYPI002886
ACYPI23539-RA Glean transcript GLEAN_03539	4.2631	1.32462e-17	ACYPI23539
ACYPI48178-RA Glean transcript GLEAN_28178	4.25398	1.68203e-17	ACYPI23539
ACYPI002859-RA RefSeq transcript XM_001943845 PREDICTED: Acyrthosiphon pisum similar to high affinity GABA transporter (LOC100161653), mRNA	4.24634	2.43403e-16	ACYPI002859
ACYPI25204-RA Glean transcript GLEAN_05204	4.2428	1.1035e-16	ACYPI087834
ACYPI48336-RA Glean transcript GLEAN_28336	4.22895	5.38932e-17	ACYPI48336	uncharacterized protein
ACYPI000246-RA RefSeq transcript XM_001949207 PREDICTED: Acyrthosiphon pisum similar to glucosyl/glucuronosyl transferases (LOC100158820), mRNA	4.21576	3.91385e-14
ACYPI53831-RA Glean transcript GLEAN_33831	4.20813	7.43781e-14
ACYPI000653-RA RefSeq transcript XM_001950868 PREDICTED: Acyrthosiphon pisum similar to CG9706 CG9706-PA (LOC100159262), mRNA	4.20111	4.28323e-11	ACYPI000653	acetyl-coenzyme a transporter
ACYPI004867-RA RefSeq transcript XM_001943885 PREDICTED: Acyrthosiphon pisum similar to Sug CG7334-PA (LOC100163810), mRNA	4.19815	5.92894e-15	ACYPI004867
ACYPI001911-RA RefSeq transcript XM_001943984 PREDICTED: Acyrthosiphon pisum similar to MEGF6 (LOC100160627), mRNA	4.17102	4.89607e-15	ACYPI001911
ACYPI003818-RA RefSeq transcript XM_001944346 PREDICTED: Acyrthosiphon pisum similar to calpain B (LOC100162677), mRNA	4.16907	3.30454e-14	ACYPI003818
ACYPI31692-RA Glean transcript GLEAN_11692	4.16449	2.16589e-15	ACYPI082595	AGAP009315-PA
ACYPI001753-RA RefSeq transcript XM_001952488 PREDICTED: Acyrthosiphon pisum similar to odorant binding protein (LOC100160457), mRNA	4.16061	1.00112e-15	ACYPI001753	ACYPI001753 protein
ACYPI005720-RA RefSeq transcript XM_001945463 PREDICTED: Acyrthosiphon pisum similar to AGAP001627-PA (LOC100164730), mRNA	4.1515	2.48345e-15	ACYPI005720	Y L amino acid transporter 2
ACYPI009602-RA RefSeq transcript XM_001950260 PREDICTED: Acyrthosiphon pisum similar to conserved hypothetical protein (LOC100168939), mRNA	4.14566	2.97207e-21	ACYPI009602	cytochrome p450
ACYPI000593-RA RefSeq transcript XM_001951120 PREDICTED: Acyrthosiphon pisum similar to cystathionine beta-lyase (LOC100159197), partial mRNA	4.12922	7.13519e-14	ACYPI000593
ACYPI000507-RA RefSeq transcript XM_001944274 PREDICTED: Acyrthosiphon pisum similar to potassium/chloride symporter, putative (LOC100159106), partial mRNA	4.10756	1.85396e-16	ACYPI000507
ACYPI004298-RA RefSeq transcript XM_001942511 PREDICTED: Acyrthosiphon pisum similar to DRAK1 (LOC100163198), mRNA	4.10735	5.78696e-18
ACYPI55955-RA Glean transcript GLEAN_35955	4.10335	1.10038e-13
ACYPI010069-RA RefSeq transcript XM_001952464 PREDICTED: Acyrthosiphon pisum similar to CG1124 CG1124-PA (LOC100169453), mRNA	4.09712	1.30397e-11	ACYPI010069
ACYPI32304-RA Glean transcript GLEAN_12304	4.08797	9.43416e-20	ACYPI006024
ACYPI46229-RA Glean transcript GLEAN_26229	4.08397	1.94153e-11
ACYPI30859-RA Glean transcript GLEAN_10859	4.07307	3.67666e-16
ACYPI006442-RA RefSeq transcript XM_001948763 PREDICTED: Acyrthosiphon pisum similar to ATP-dependent bile acid permease (LOC100165493), mRNA	4.0723	3.08577e-23	ACYPI006442	Multidrug resistance protein 4
ACYPI22492-RA Glean transcript GLEAN_02492	4.06378	2.12327e-17
ACYPI002363-RA RefSeq transcript XM_001943491 PREDICTED: Acyrthosiphon pisum similar to ATP-dependent bile acid permease (LOC100161113), partial mRNA	4.06251	7.30627e-17	ACYPI002363	multidrug resistance protein 2 atp-binding cassette protein c
ACYPI48423-RA Glean transcript GLEAN_28423	4.06043	6.65401e-17	ACYPI48423	Limulus clotting factor C
ACYPI006452-RA RefSeq transcript XM_001944030 PREDICTED: Acyrthosiphon pisum hypothetical protein LOC100165505 (LOC100165505), mRNA	4.04964	4.11008e-12	ACYPI006452	uncharacterized protein
ACYPI009320-RA RefSeq transcript XM_001948665 PREDICTED: Acyrthosiphon pisum similar to leucine-rich transmembrane protein (LOC100168639), mRNA	4.04607	1.40616e-16	ACYPI009320
ACYPI50935-RA Glean transcript GLEAN_30935	4.03273	2.7365e-19	ACYPI50935	Endonuclease and reverse transcriptase-like protein
ACYPI27282-RA Glean transcript GLEAN_07282	4.02559	5.71275e-17	ACYPI27282	uncharacterized protein
ACYPI009073-RA RefSeq transcript XM_001951946 PREDICTED: Acyrthosiphon pisum hypothetical protein LOC100168366 (LOC100168366), mRNA	4.01054	1.28706e-19	ACYPI009073
ACYPI006460-RA RefSeq transcript XM_001945936 PREDICTED: Acyrthosiphon pisum similar to fibrillin 2 (LOC100165514), mRNA	3.99601	6.17826e-16	ACYPI006460
ACYPI000444-RA RefSeq transcript XM_001950904 PREDICTED: Acyrthosiphon pisum similar to cuticle protein (LOC100159033), mRNA	3.9809	3.46151e-06	ACYPI007152
ACYPI007348-RA RefSeq transcript XM_001943242 PREDICTED: Acyrthosiphon pisum similar to 5-nucleotidase (LOC100166480), mRNA	3.97928	7.28572e-19	ACYPI007348
ACYPI004737-RA RefSeq transcript XM_001946357 PREDICTED: Acyrthosiphon pisum hypothetical protein LOC100163669 (LOC100163669), mRNA	3.97592	2.38039e-15	ACYPI004737	uncharacterized protein
ACYPI005168-RA RefSeq transcript XM_001944675 PREDICTED: Acyrthosiphon pisum similar to Bifunctional endo-1,4-beta-xylanase xylA precursor, putative, transcript variant 1 (LOC100164129), mRNA	3.97483	9.07823e-11
ACYPI004849-RA RefSeq transcript XM_001947052 PREDICTED: Acyrthosiphon pisum similar to FGGY carbohydrate kinase domain containing (LOC100163790), partial mRNA	3.94957	1.08088e-14	ACYPI004849
ACYPI008216-RA RefSeq transcript XM_001944993 PREDICTED: Acyrthosiphon pisum similar to SD08430p (LOC100167419), mRNA	3.94296	1.07743e-12	ACYPI008216
ACYPI002430-RA RefSeq transcript XM_001952657 PREDICTED: Acyrthosiphon pisum similar to AGAP006643-PA (LOC100161188), mRNA	3.94011	5.64649e-20	ACYPI002430	AGAP006643-PA
ACYPI005172-RA RefSeq transcript XM_001952246 PREDICTED: Acyrthosiphon pisum similar to GTP cyclohydrolase I (LOC100164133), mRNA	3.93604	5.98276e-16	ACYPI005172	GTP cyclohydrolase 1
ACYPI009776-RA RefSeq transcript XM_001943373 PREDICTED: Acyrthosiphon pisum similar to organic cation transporter (LOC100169129), mRNA	3.92932	8.36343e-14	ACYPI009776	Organic cation transporter
ACYPI008712-RA RefSeq transcript XM_001945599 PREDICTED: Acyrthosiphon pisum similar to AGAP003572-PA (LOC100167969), partial mRNA	3.91636	1.36266e-17	ACYPI008712
ACYPI001811-RA RefSeq transcript XM_001945070 PREDICTED: Acyrthosiphon pisum similar to Multiple C2 domain and transmembrane region protein CG15078-PA (LOC100160521), mRNA	3.91215	5.29681e-16	ACYPI001811
ACYPI53062-RA Glean transcript GLEAN_33062	3.90297	9.86054e-12	ACYPI53062	Transposable element P transposase
ACYPI47442-RA Glean transcript GLEAN_27442	3.89092	2.25485e-17
ACYPI52358-RA Glean transcript GLEAN_32358	3.87636	1.69266e-13	ACYPI52358
ACYPI001094-RA RefSeq transcript XM_001951277 PREDICTED: Acyrthosiphon pisum hypothetical protein LOC100159745 (LOC100159745), mRNA	3.86704	0.000123262	ACYPI001094	uncharacterized protein
ACYPI005168-RB RefSeq transcript XM_001944738 PREDICTED: Acyrthosiphon pisum similar to Bifunctional endo-1,4-beta-xylanase xylA precursor, putative, transcript variant 2 (LOC100164129), mRNA	3.85603	5.77957e-10
ACYPI000239-RA RefSeq transcript XM_001947604 PREDICTED: Acyrthosiphon pisum similar to CG6293 CG6293-PA (LOC100158812), mRNA	3.85522	1.32896e-13	ACYPI000239
ACYPI40422-RA Glean transcript GLEAN_20422	3.84523	8.69435e-20	ACYPI40422	uncharacterized protein
ACYPI002475-RA RefSeq transcript XM_001948912 PREDICTED: Acyrthosiphon pisum similar to AGAP004572-PA (LOC100161238), mRNA	3.84015	1.89573e-14	ACYPI002475
ACYPI008496-RA RefSeq transcript XM_001950759 PREDICTED: Acyrthosiphon pisum hypothetical protein LOC100167729 (LOC100167729), mRNA	3.83989	7.21859e-15	ACYPI008496
ACYPI005979-RA RefSeq transcript XM_001950895 PREDICTED: Acyrthosiphon pisum hypothetical protein LOC100165005 (LOC100165005), mRNA	3.83836	1.6397e-13	ACYPI005979	uncharacterized protein
ACYPI001563-RA RefSeq transcript XM_001946609 PREDICTED: Acyrthosiphon pisum similar to AGAP007483-PA (LOC100160251), mRNA	3.83722	1.09314e-14	ACYPI001563	AGAP007483-PA
ACYPI003828-RA RefSeq transcript XM_001949424 PREDICTED: Acyrthosiphon pisum similar to trehalase (LOC100162689), mRNA	3.83477	5.01471e-13	ACYPI003828
ACYPI000580-RA RefSeq transcript XM_001950561 PREDICTED: Acyrthosiphon pisum similar to zinc metalloprotease (LOC100159184), mRNA	3.81925	8.26387e-20	ACYPI000580	neutral endopeptidase
ACYPI008878-RA RefSeq transcript XM_001949704 PREDICTED: Acyrthosiphon pisum similar to AGAP007732-PA (LOC100168152), mRNA	3.81522	5.02926e-12	ACYPI008878
ACYPI29381-RA Glean transcript GLEAN_09381	3.8141	1.28226e-15	ACYPI29381	Unc-5
ACYPI001925-RA RefSeq transcript XM_001944304 PREDICTED: Acyrthosiphon pisum similar to Trk-like receptor tyrosine kinase (LOC100160641), mRNA	3.77584	2.32853e-12	ACYPI001925	tyrosine-protein kinase transmembrane receptor ror
ACYPI36102-RA Glean transcript GLEAN_16102	3.74872	1.68934e-12
ACYPI56046-RA Glean transcript GLEAN_36046	3.73873	1.92953e-11
ACYPI32749-RA Glean transcript GLEAN_12749	3.73665	6.52604e-19	ACYPI32749	Abhydrolase domain-containing protein 12
ACYPI54458-RA Glean transcript GLEAN_34458	3.73537	1.41453e-18	ACYPI54458
ACYPI003091-RA RefSeq transcript XM_001949895 PREDICTED: Acyrthosiphon pisum similar to nicotinic acetylcholine receptor alpha 3 subunit (LOC100161903), partial mRNA	3.72387	3.17022e-12	ACYPI003091	Neuronal nicotinic acetylcholine receptor alpha-3
ACYPI006661-RA RefSeq transcript XM_001948460 PREDICTED: Acyrthosiphon pisum similar to empty spiracles (LOC100165732), mRNA	3.71528	1.13899e-13	ACYPI006661
ACYPI007237-RA RefSeq transcript XM_001944133 PREDICTED: Acyrthosiphon pisum similar to organic cation transporter (LOC100166357), mRNA	3.70139	1.74639e-13	ACYPI007237	Organic cation transporter
ACYPI34932-RA Glean transcript GLEAN_14932	3.67356	5.49137e-10	ACYPI53871
ACYPI28238-RA Glean transcript GLEAN_08238	3.66046	1.073e-16
ACYPI009668-RA RefSeq transcript XM_001944158 PREDICTED: Acyrthosiphon pisum similar to Serine/threonine-protein kinase Nek7 (LOC100169010), mRNA	3.65977	1.98692e-11	ACYPI009668
ACYPI41908-RA Glean transcript GLEAN_21908	3.65405	2.54272e-15	ACYPI41908	uncharacterized protein
ACYPI003368-RA RefSeq transcript XM_001948278 PREDICTED: Acyrthosiphon pisum similar to serine/threonine kinase, transcript variant 1 (LOC100162203), mRNA	3.65171	2.49135e-17	ACYPI003368
ACYPI52909-RA Glean transcript GLEAN_32909	3.64384	1.11775e-15
ACYPI21818-RA Glean transcript GLEAN_01818	3.63628	4.51293e-13
ACYPI003368-RC RefSeq transcript XM_001948380 PREDICTED: Acyrthosiphon pisum similar to serine/threonine kinase, transcript variant 3 (LOC100162203), mRNA	3.63277	8.36767e-17	ACYPI003368
ACYPI005170-RA RefSeq transcript XM_001943525 PREDICTED: Acyrthosiphon pisum similar to SD08430p (LOC100164131), mRNA	3.6113	1.14938e-09	ACYPI005170	Acetyl-coenzyme A transporter 1
ACYPI004406-RA RefSeq transcript XM_001951168 PREDICTED: Acyrthosiphon pisum similar to CG11550 CG11550-PA (LOC100163312), mRNA	3.59863	3.22114e-20	ACYPI004406	uncharacterized protein
ACYPI001243-RA RefSeq transcript XM_001942690 PREDICTED: Acyrthosiphon pisum similar to GH10292p (LOC100159903), partial mRNA	3.59412	7.66043e-18	ACYPI001243	CG40467
ACYPI25062-RA Glean transcript GLEAN_05062	3.58358	1.35138e-16
ACYPI009055-RA RefSeq transcript XM_001942639 PREDICTED: Acyrthosiphon pisum similar to troponin C type IIIa (LOC100168346), mRNA	3.57498	1.14254e-18	ACYPI009055
ACYPI000397-RA RefSeq transcript XM_001950491 PREDICTED: Acyrthosiphon pisum hypothetical protein LOC100158983 (LOC100158983), mRNA	3.56987	1.95527e-24	ACYPI000397	uncharacterized protein
ACYPI006588-RA RefSeq transcript XM_001943313 PREDICTED: Acyrthosiphon pisum similar to ubiquitin-protein ligase (LOC100165656), partial mRNA	3.53327	5.79654e-13	ACYPI006588	Tolloid-like protein 2
ACYPI006654-RA RefSeq transcript XM_001949853 PREDICTED: Acyrthosiphon pisum similar to AGAP004915-PA (LOC100165725), partial mRNA	3.52244	2.69226e-12	ACYPI006654	lachesin precursor
ACYPI27266-RA Glean transcript GLEAN_07266	3.49957	8.24695e-17	ACYPI27266
ACYPI009304-RA RefSeq transcript XM_001948294 PREDICTED: Acyrthosiphon pisum similar to sugar transporter (LOC100168622), mRNA	3.44525	3.48708e-13	ACYPI009304
ACYPI004226-RA RefSeq transcript XM_001943790 PREDICTED: Acyrthosiphon pisum hypothetical protein LOC100163119 (LOC100163119), mRNA	3.43355	0.000364839	ACYPI004226	uncharacterized protein
ACYPI004864-RA RefSeq transcript XM_001950894 PREDICTED: Acyrthosiphon pisum similar to CG14691 CG14691-PA (LOC100163807), mRNA	3.41559	1.71329e-12	ACYPI004864	synaptic vesicle protein
ACYPI24439-RA Glean transcript GLEAN_04439	3.41274	2.70808e-11	ACYPI006588	Tolloid-like protein 2
ACYPI50923-RA Glean transcript GLEAN_30923	3.41064	1.33782e-18	ACYPI50923
ACYPI009100-RA RefSeq transcript XM_001949848 PREDICTED: Acyrthosiphon pisum similar to lachesin, putative (LOC100168395), mRNA	3.39522	5.32858e-14	ACYPI009100
ACYPI007152-RA RefSeq transcript XM_001946551 PREDICTED: Acyrthosiphon pisum similar to cuticle protein (LOC100166268), mRNA	3.39362	1.31489e-05	ACYPI007152
ACYPI54838-RA Glean transcript GLEAN_34838	3.38441	6.14764e-16
ACYPI50695-RA Glean transcript GLEAN_30695	3.37669	9.11709e-12
ACYPI002452-RA RefSeq transcript XM_001943753 PREDICTED: Acyrthosiphon pisum similar to putative 5-nucleotidase (LOC100161212), partial mRNA	3.37564	3.43834e-09	ACYPI007348
ACYPI002795-RA RefSeq transcript XM_001950284 PREDICTED: Acyrthosiphon pisum similar to aminomethyltransferase (LOC100161583), mRNA	3.36794	1.14132e-11	ACYPI009177
ACYPI007050-RA RefSeq transcript XM_001942896 PREDICTED: Acyrthosiphon pisum similar to CG9990 CG9990-PA (LOC100166151), mRNA	3.36129	6.08451e-16	ACYPI007050	abc transporter
ACYPI51424-RA Glean transcript GLEAN_31424	3.35317	6.85541e-15	ACYPI51424
ACYPI008426-RA RefSeq transcript XM_001948291 PREDICTED: Acyrthosiphon pisum hypothetical protein LOC100167649 (LOC100167649), mRNA	3.35033	1.46055e-15	ACYPI008426
ACYPI009703-RA RefSeq transcript XM_001948416 PREDICTED: Acyrthosiphon pisum hypothetical protein LOC100169049 (LOC100169049), mRNA	3.34328	1.37436e-06	ACYPI21300	uncharacterized protein
ACYPI009831-RA RefSeq transcript XM_001944572 PREDICTED: Acyrthosiphon pisum similar to nicotinic acetylcholine receptor alpha 3 subunit (LOC100169190), partial mRNA	3.32349	3.68989e-12
ACYPI42066-RA Glean transcript GLEAN_22066	3.32272	3.94817e-13	ACYPI071959	uncharacterized protein
ACYPI000221-RA RefSeq transcript XM_001948741 PREDICTED: Acyrthosiphon pisum similar to putative glycoprotein hormone rk-like receptor (AGAP008347-PA) (LOC100158787), mRNA	3.32145	5.10597e-14	ACYPI000221	Bursicon receptor
ACYPI003772-RA RefSeq transcript XM_001950680 PREDICTED: Acyrthosiphon pisum similar to SD08430p (LOC100162627), mRNA	3.32131	7.72007e-13	ACYPI003772	acetyl-coenzyme a transporter
ACYPI001349-RA RefSeq transcript XM_001951912 PREDICTED: Acyrthosiphon pisum hypothetical protein LOC100160015 (LOC100160015), mRNA	3.31128	1.11556e-11
ACYPI007397-RA RefSeq transcript XM_001949369 PREDICTED: Acyrthosiphon pisum similar to GA19830-PA (LOC100166535), mRNA	3.2939	3.38874e-16	ACYPI007397
ACYPI009882-RA RefSeq transcript XM_001952375 PREDICTED: Acyrthosiphon pisum similar to SD27140p (LOC100169244), mRNA	3.29303	2.72794e-14	ACYPI009882
ACYPI007955-RA RefSeq transcript XM_001948039 PREDICTED: Acyrthosiphon pisum similar to ubiquitin-protein ligase (LOC100167138), partial mRNA	3.29232	9.78455e-12	ACYPI007955	Tolloid-like protein 2
ACYPI29243-RA Glean transcript GLEAN_09243	3.29145	1.28628e-11
ACYPI51480-RA Glean transcript GLEAN_31480	3.28487	5.24986e-11	ACYPI51480
ACYPI002007-RA RefSeq transcript XM_001950403 PREDICTED: Acyrthosiphon pisum similar to 3-alpha-(or 20-beta)-hydroxysteroid dehydrogenase (LOC100160733), mRNA	3.26957	3.15304e-08	ACYPI002007	antdh-PA
ACYPI37496-RA Glean transcript GLEAN_17496	3.26744	2.55536e-11	ACYPI37496	Endonuclease-reverse transcriptase
ACYPI50065-RA Glean transcript GLEAN_30065	3.26473	8.88454e-14	ACYPI50065	uncharacterized protein
ACYPI36544-RA Glean transcript GLEAN_16544	3.26309	3.60712e-13	ACYPI36544	WD repeat-containing protein 65-like
ACYPI28283-RA Glean transcript GLEAN_08283	3.2626	3.3643e-16
ACYPI000757-RA RefSeq transcript XM_001948115 PREDICTED: Acyrthosiphon pisum similar to Cad88C CG3389-PA (LOC100159383), mRNA	3.26245	2.91526e-13	ACYPI000757
ACYPI000143-RA RefSeq transcript XM_001945648 PREDICTED: Acyrthosiphon pisum similar to bifid CG3578-PA (LOC100158703), mRNA	3.24811	3.44619e-15	ACYPI000143	Bi
ACYPI004906-RA RefSeq transcript XM_001949543 PREDICTED: Acyrthosiphon pisum similar to AGAP005962-PA (LOC100163850), mRNA	3.24192	2.70784e-16	ACYPI004906	AGAP005962-PA
ACYPI40993-RA Glean transcript GLEAN_20993	3.23858	2.29114e-15	ACYPI40993
ACYPI27806-RA Glean transcript GLEAN_07806	3.23207	1.18466e-09	ACYPI002821	Prominin-like protein
ACYPI56075-RA Glean transcript GLEAN_36075	3.22062	1.33303e-18	ACYPI087237	uncharacterized protein
ACYPI008304-RA RefSeq transcript XM_001943321 PREDICTED: Acyrthosiphon pisum similar to beta-N-acetylglucoasminidase 1 (LOC100167510), mRNA	3.21959	8.84402e-19	ACYPI008304	Beta-hexosaminidase subunit beta
ACYPI32877-RA Glean transcript GLEAN_12877	3.21886	5.85195e-15
ACYPI010022-RA RefSeq transcript XM_001944990 PREDICTED: Acyrthosiphon pisum similar to CLIP-domain serine protease subfamily A (AGAP006954-PA) (LOC100169399), mRNA	3.20665	7.68691e-18	ACYPI010022
ACYPI37851-RA Glean transcript GLEAN_17851	3.20236	5.38565e-12	ACYPI37851
ACYPI006531-RA RefSeq transcript XM_001945539 PREDICTED: Acyrthosiphon pisum hypothetical protein LOC100165596 (LOC100165596), mRNA	3.19702	8.9316e-10	ACYPI006531	N-acetylmuramoyl-L-alanine amidase AmiD
ACYPI45498-RA Glean transcript GLEAN_25498	3.18401	3.53986e-11	ACYPI45498
ACYPI000452-RA RefSeq transcript XM_001943023 PREDICTED: Acyrthosiphon pisum similar to CG14205 CG14205-PA (LOC100159041), mRNA	3.18328	9.6603e-12	ACYPI000452
ACYPI34864-RA Glean transcript GLEAN_14864	3.17578	3.86236e-14	ACYPI34864	uncharacterized protein
ACYPI54474-RA Glean transcript GLEAN_34474	3.15046	1.49866e-09	ACYPI54474
ACYPI003897-RA RefSeq transcript XM_001946129 PREDICTED: Acyrthosiphon pisum similar to Discoidin domain receptor CG33531-PA (LOC100162767), mRNA	3.13515	1.24686e-12	ACYPI003897
ACYPI002899-RA RefSeq transcript XM_001948189 PREDICTED: Acyrthosiphon pisum similar to CG10738 CG10738-PB (LOC100161698), partial mRNA	3.12773	3.31441e-10	ACYPI002899	Guanylate cyclase
ACYPI001170-RA RefSeq transcript XM_001942849 PREDICTED: Acyrthosiphon pisum similar to GA21699-PA (LOC100159827), mRNA	3.12674	1.00968e-15	ACYPI001170
ACYPI000484-RA RefSeq transcript XM_001950822 PREDICTED: Acyrthosiphon pisum similar to alcohol dehydrogenase (LOC100159076), partial mRNA	3.12536	7.02717e-09	ACYPI000484	Glucose dehydrogenase [acceptor]
ACYPI007383-RA RefSeq transcript XM_001944099 PREDICTED: Acyrthosiphon pisum similar to hexosaminidase B (LOC100166519), partial mRNA	3.12424	1.28669e-14
ACYPI006744-RA RefSeq transcript XM_001952738 PREDICTED: Acyrthosiphon pisum similar to Neprilysin 5 CG6265-PB (LOC100165822), mRNA	3.11777	1.45806e-12	ACYPI006744	Zinc metalloprotease
ACYPI009177-RA RefSeq transcript XM_001943514 PREDICTED: Acyrthosiphon pisum similar to aminomethyltransferase (LOC100168482), mRNA	3.10811	2.28269e-12	ACYPI009177
ACYPI55028-RA Glean transcript GLEAN_35028	3.10385	9.68541e-17
ACYPI004625-RA RefSeq transcript XM_001945944 PREDICTED: Acyrthosiphon pisum similar to Beta-hexosaminidase subunit beta precursor (N-acetyl-beta-glucosaminidase subunit beta) (Beta-N-acetylhexosaminidase subunit beta) (Hexosaminidase subunit B) (LOC100163544), mRNA	3.09954	1.13467e-15	ACYPI004625	Beta-hexosaminidase subunit beta
ACYPI54717-RA Glean transcript GLEAN_34717	3.0837	1.30389e-08
ACYPI55207-RA Glean transcript GLEAN_35207	3.06754	1.50702e-12
ACYPI45447-RA Glean transcript GLEAN_25447	3.0642	3.92391e-14
ACYPI47399-RA Glean transcript GLEAN_27399	3.05692	2.81437e-09
ACYPI34585-RA Glean transcript GLEAN_14585	3.05042	2.46494e-12	ACYPI34585
ACYPI000190-RA RefSeq transcript XM_001946461 PREDICTED: Acyrthosiphon pisum similar to serine protease (LOC100158752), mRNA	3.04869	5.6659e-14
ACYPI000844-RA RefSeq transcript XM_001944663 PREDICTED: Acyrthosiphon pisum similar to scabrous protein (LOC100159477), mRNA	3.04859	3.88997e-09	ACYPI000844
ACYPI002784-RA RefSeq transcript XM_001952584 PREDICTED: Acyrthosiphon pisum similar to AGAP003680-PA (LOC100161572), mRNA	3.04647	1.50923e-12	ACYPI007050	abc transporter
ACYPI005060-RA RefSeq transcript XM_001943161 PREDICTED: Acyrthosiphon pisum similar to glycine dehydrogenase, mitochondrial (LOC100164013), mRNA	3.04495	4.96976e-16	ACYPI005060
ACYPI23130-RA Glean transcript GLEAN_03130	3.04226	1.21467e-11
ACYPI36992-RA Glean transcript GLEAN_16992	3.04157	3.36642e-15
ACYPI001998-RA RefSeq transcript XM_001949211 PREDICTED: Acyrthosiphon pisum similar to conserved hypothetical protein (LOC100160722), mRNA	3.03579	1.12723e-09	ACYPI001998	uncharacterized protein
ACYPI007222-RA RefSeq transcript XM_001943717 PREDICTED: Acyrthosiphon pisum similar to calcitonin receptor (LOC100166340), partial mRNA	3.03012	2.04164e-15	ACYPI007222	Calcitonin receptor
ACYPI003008-RA RefSeq transcript XM_001949885 PREDICTED: Acyrthosiphon pisum similar to AGAP007667-PA (LOC100161811), mRNA	3.01669	3.30152e-13	ACYPI003008	Sugar transporter 12
ACYPI003130-RA RefSeq transcript XM_001950626 PREDICTED: Acyrthosiphon pisum similar to genderblind CG6070-PA (LOC100161944), mRNA	3.01636	3.7337e-11	ACYPI009467	GH08870p
ACYPI53658-RA Glean transcript GLEAN_33658	3.01502	2.11065e-08	ACYPI53658	Noggin
ACYPI001345-RA RefSeq transcript XM_001943218 PREDICTED: Acyrthosiphon pisum hypothetical protein LOC100160011 (LOC100160011), mRNA	3.01009	9.13631e-09	ACYPI001345	uncharacterized protein
ACYPI23058-RA Glean transcript GLEAN_03058	2.99788	2.95543e-11	ACYPI23058
ACYPI002100-RA RefSeq transcript XM_001943105 PREDICTED: Acyrthosiphon pisum similar to fatty acid synthase (LOC100160831), partial mRNA	2.99732	1.92894e-06	ACYPI002100
ACYPI001261-RA RefSeq transcript XM_001951481 PREDICTED: Acyrthosiphon pisum similar to CG9706 CG9706-PA (LOC100159922), mRNA	2.99579	1.92351e-17	ACYPI001261	acetyl-coenzyme a transporter
ACYPI49259-RA Glean transcript GLEAN_29259	2.99139	8.09967e-10	ACYPI49259
ACYPI001631-RA RefSeq transcript XM_001942832 PREDICTED: Acyrthosiphon pisum similar to GA17032-PA (LOC100160328), mRNA	2.98983	5.6319e-15	ACYPI001631
ACYPI24835-RA Glean transcript GLEAN_04835	2.98549	6.79674e-14	ACYPI24835	uncharacterized protein
ACYPI35649-RA Glean transcript GLEAN_15649	2.9841	1.4934e-10
ACYPI23452-RA Glean transcript GLEAN_03452	2.97907	5.49599e-12
ACYPI005105-RA RefSeq transcript XM_001950567 PREDICTED: Acyrthosiphon pisum hypothetical protein LOC100164064 (LOC100164064), mRNA	2.97883	3.33551e-17	ACYPI005105	uncharacterized protein
ACYPI43313-RA Glean transcript GLEAN_23313	2.97574	1.56238e-13	ACYPI43313
ACYPI002376-RA RefSeq transcript XM_001945491 PREDICTED: Acyrthosiphon pisum similar to Protein dispatched homolog 1 (LOC100161127), mRNA	2.97147	3.7337e-11	ACYPI002376
ACYPI002562-RA RefSeq transcript XM_001942487 PREDICTED: Acyrthosiphon pisum hypothetical protein LOC100161332 (LOC100161332), mRNA	2.96993	0.000217233	ACYPI002562	uncharacterized protein
ACYPI001245-RA RefSeq transcript XM_001950671 PREDICTED: Acyrthosiphon pisum similar to AGAP012703-PA (LOC100159905), mRNA	2.96654	2.85764e-10	ACYPI001245
ACYPI001968-RA RefSeq transcript XM_001943521 PREDICTED: Acyrthosiphon pisum similar to Fasciclin-2 precursor (Fasciclin II) (FAS II) (LOC100160689), partial mRNA	2.96199	1.11054e-11	ACYPI001968
ACYPI30639-RA Glean transcript GLEAN_10639	2.9581	8.53993e-11
ACYPI004408-RA RefSeq transcript XM_001944867 PREDICTED: Acyrthosiphon pisum similar to AGAP008521-PA (LOC100163314), partial mRNA	2.95608	4.00152e-18	ACYPI004408	low density lipoprotein receptor adapter protein
ACYPI000735-RA RefSeq transcript XM_001950056 PREDICTED: Acyrthosiphon pisum similar to g-protein receptor (LOC100159355), mRNA	2.95091	1.37872e-10	ACYPI000735
ACYPI000991-RA RefSeq transcript XM_001948176 PREDICTED: Acyrthosiphon pisum similar to GA12977-PA (LOC100159637), mRNA	2.95086	3.55284e-14	ACYPI000991	fatty acyl-coa reductase
ACYPI46292-RA Glean transcript GLEAN_26292	2.94615	1.0131e-13	ACYPI46292
ACYPI38524-RA Glean transcript GLEAN_18524	2.93711	3.17022e-12	ACYPI38524
ACYPI005314-RA RefSeq transcript XM_001949611 PREDICTED: Acyrthosiphon pisum similar to AGAP004519-PA (LOC100164284), mRNA	2.93395	9.75945e-13	ACYPI005314	mitochondrial sideroflexin tricarboxylate transporter
ACYPI51890-RA Glean transcript GLEAN_31890	2.92907	1.42279e-12	ACYPI51890
ACYPI53628-RA Glean transcript GLEAN_33628	2.91343	1.32869e-10	ACYPI002617
ACYPI010218-RA RefSeq transcript XM_001945863 PREDICTED: Acyrthosiphon pisum similar to Ring canal kelch protein (LOC100169615), mRNA	2.91227	2.24711e-12	ACYPI010218
ACYPI009109-RA RefSeq transcript XM_001948825 PREDICTED: Acyrthosiphon pisum hypothetical protein LOC100168405 (LOC100168405), mRNA	2.9081	3.57398e-12	ACYPI009109	uncharacterized protein
ACYPI43325-RA Glean transcript GLEAN_23325	2.90207	5.6335e-15
ACYPI34505-RA Glean transcript GLEAN_14505	2.89951	4.0761e-10
ACYPI010159-RA RefSeq transcript XM_001951788 PREDICTED: Acyrthosiphon pisum similar to CG17323 CG17323-PA (LOC100169551), mRNA	2.89269	3.25777e-10	ACYPI010159	glucosyl/glucuronosyl transferases
ACYPI26575-RA Glean transcript GLEAN_06575	2.89223	4.8835e-12	ACYPI26575
ACYPI001240-RA RefSeq transcript XM_001944461 PREDICTED: Acyrthosiphon pisum similar to myosin x (LOC100159900), partial mRNA	2.88976	2.82329e-11
ACYPI22938-RA Glean transcript GLEAN_02938	2.88753	1.08439e-13	ACYPI22938
ACYPI006190-RA RefSeq transcript XM_001944244 PREDICTED: Acyrthosiphon pisum hypothetical protein LOC100165230 (LOC100165230), mRNA	2.88693	1.25676e-15	ACYPI006190
ACYPI003329-RA RefSeq transcript XM_001948645 PREDICTED: Acyrthosiphon pisum similar to juvenile hormone esterase-like protein (LOC100162157), mRNA	2.87446	1.48751e-10	ACYPI008270
ACYPI005293-RA RefSeq transcript XM_001943223 PREDICTED: Acyrthosiphon pisum hypothetical protein LOC100164262 (LOC100164262), mRNA	2.87159	4.6268e-16	ACYPI20040	smile protein
ACYPI007727-RA RefSeq transcript XM_001952651 PREDICTED: Acyrthosiphon pisum similar to ADAM metalloprotease (LOC100166889), partial mRNA	2.86465	2.0685e-18	ACYPI007727
ACYPI002552-RA RefSeq transcript XM_001944050 PREDICTED: Acyrthosiphon pisum similar to serine protease (LOC100161321), partial mRNA	2.86178	2.94526e-13	ACYPI002755	Proclotting enzyme
ACYPI008999-RA RefSeq transcript XM_001944720 PREDICTED: Acyrthosiphon pisum similar to solute carrier family 35 member C2 (LOC100168283), mRNA	2.86135	4.47699e-08	ACYPI008999
ACYPI002910-RA RefSeq transcript XM_001943220 PREDICTED: Acyrthosiphon pisum similar to carboxypeptidase, vitellogenic-like (LOC100161709), mRNA	2.85935	2.0172e-14	ACYPI002910
ACYPI002079-RA RefSeq transcript XM_001944452 PREDICTED: Acyrthosiphon pisum similar to cytochrome P450 (LOC100160808), mRNA	2.85417	4.25456e-09	ACYPI002079	AGAP002196-PA
ACYPI34791-RA Glean transcript GLEAN_14791	2.85331	7.97928e-09	ACYPI34791
ACYPI003474-RA RefSeq transcript XM_001947249 PREDICTED: Acyrthosiphon pisum similar to transglutaminase (LOC100162315), mRNA	2.84314	1.67381e-11	ACYPI006314	hemocyte protein-glutamine gamma-glutamyltransferase
ACYPI008657-RA RefSeq transcript XM_001942576 PREDICTED: Acyrthosiphon pisum similar to GST, transcript variant 1 (LOC100167906), mRNA	2.83897	2.30091e-15	ACYPI008657	GST
ACYPI008871-RA RefSeq transcript XM_001947346 PREDICTED: Acyrthosiphon pisum similar to MPA13 allergen (LOC100168145), mRNA	2.83777	2.65806e-09	ACYPI008871	Fatty acid-binding protein 9
ACYPI006681-RA RefSeq transcript XM_001945473 PREDICTED: Acyrthosiphon pisum similar to Excitatory amino acid transporter 2 CG3159-PA (LOC100165752), mRNA	2.83603	8.96495e-09	ACYPI006681
ACYPI006267-RA RefSeq transcript XM_001951898 PREDICTED: Acyrthosiphon pisum similar to KRAB-A domain containing 2 (LOC100165310), mRNA	2.83562	1.29222e-11	ACYPI073124	uncharacterized protein
ACYPI004348-RA RefSeq transcript XM_001945270 PREDICTED: Acyrthosiphon pisum similar to predicted protein (LOC100163250), mRNA	2.83224	4.43288e-12	ACYPI004348
ACYPI003583-RA RefSeq transcript XM_001947974 PREDICTED: Acyrthosiphon pisum hypothetical protein LOC100162431 (LOC100162431), mRNA	2.8274	1.25364e-09	ACYPI003583
ACYPI008517-RA RefSeq transcript XM_001946607 PREDICTED: Acyrthosiphon pisum similar to adenylate cyclase (LOC100167751), mRNA	2.81866	2.06449e-15	ACYPI008517	adenylate cyclase
ACYPI009911-RA RefSeq transcript XM_001943545 PREDICTED: Acyrthosiphon pisum similar to hairy E protein (LOC100169277), mRNA	2.81332	1.48445e-08	ACYPI009911	hairy E protein
ACYPI000277-RA RefSeq transcript XM_001942915 PREDICTED: Acyrthosiphon pisum similar to GA17497-PA (LOC100158855), mRNA	2.80836	1.4438e-12	ACYPI000277	fatty acid synthase
ACYPI000802-RA RefSeq transcript XM_001943597 PREDICTED: Acyrthosiphon pisum similar to AGAP003930-PA (LOC100159429), mRNA	2.80637	3.39955e-07	ACYPI000802	jmjc domain-containing histone demethylation protein
ACYPI005907-RA RefSeq transcript XM_001948047 PREDICTED: Acyrthosiphon pisum similar to macrophage migration inhibitory factor (LOC100164929), mRNA	2.79656	1.52929e-14	ACYPI005907
ACYPI23251-RA Glean transcript GLEAN_03251	2.7964	1.89583e-14
ACYPI42940-RA Glean transcript GLEAN_22940	2.79375	3.79138e-07
ACYPI37111-RA Glean transcript GLEAN_17111	2.78511	1.11063e-12
ACYPI007275-RA RefSeq transcript XM_001943358 PREDICTED: Acyrthosiphon pisum similar to Immunoglobulin I-set domain containing protein (LOC100166399), mRNA	2.78397	4.04386e-12	ACYPI007275	uncharacterized protein
ACYPI004290-RA RefSeq transcript XM_001947691 PREDICTED: Acyrthosiphon pisum similar to AGAP009315-PA (LOC100163190), mRNA	2.78291	8.7691e-11
ACYPI37523-RA Glean transcript GLEAN_17523	2.77914	1.66823e-08
ACYPI53101-RA Glean transcript GLEAN_33101	2.77819	3.44331e-11
ACYPI25740-RA Glean transcript GLEAN_05740	2.77627	4.45968e-15	ACYPI062983	pol-like protein
ACYPI38920-RA Glean transcript GLEAN_18920	2.77074	8.58148e-11	ACYPI071073	endonuclease and reverse transcriptase-like protein
ACYPI54663-RA Glean transcript GLEAN_34663	2.77074	9.94159e-11	ACYPI54663
ACYPI008951-RA RefSeq transcript XM_001943691 PREDICTED: Acyrthosiphon pisum similar to Z9-desaturase SFWG5A (LOC100168230), mRNA	2.7671	1.20136e-11	ACYPI008951
ACYPI46298-RA Glean transcript GLEAN_26298	2.76445	2.33442e-08	ACYPI46298
ACYPI51346-RA Glean transcript GLEAN_31346	2.76302	6.36721e-17	ACYPI009635	CG10877
ACYPI25254-RA Glean transcript GLEAN_05254	2.76272	1.43249e-09	ACYPI25254
ACYPI23279-RA Glean transcript GLEAN_03279	2.75999	6.59334e-16	ACYPI23279	znf452
ACYPI007400-RA RefSeq transcript XM_001942723 PREDICTED: Acyrthosiphon pisum similar to pol-like protein (LOC100166539), mRNA	2.75166	7.09702e-12	ACYPI007400
ACYPI46379-RA Glean transcript GLEAN_26379	2.74597	4.23374e-13
ACYPI25166-RA Glean transcript GLEAN_05166	2.74512	8.44433e-10	ACYPI25166	uncharacterized protein
ACYPI30812-RA Glean transcript GLEAN_10812	2.72473	2.97365e-14	ACYPI30812
ACYPI55587-RA Glean transcript GLEAN_35587	2.71876	2.4055e-10
ACYPI002471-RA RefSeq transcript XM_001945401 PREDICTED: Acyrthosiphon pisum similar to adipokinetic hormone receptor (LOC100161233), mRNA	2.70993	4.11867e-09	ACYPI002471
ACYPI48365-RA Glean transcript GLEAN_28365	2.70783	2.26517e-06	ACYPI48365	uncharacterized protein
ACYPI008139-RA RefSeq transcript XM_001948055 PREDICTED: Acyrthosiphon pisum similar to synaptic vesicle protein (LOC100167336), mRNA	2.70207	1.88665e-19	ACYPI008139
ACYPI006755-RA RefSeq transcript XM_001948633 PREDICTED: Acyrthosiphon pisum similar to cytochrome P450 monooxygenase (LOC100165833), mRNA	2.70102	7.83652e-12
ACYPI002083-RA RefSeq transcript XM_001947957 PREDICTED: Acyrthosiphon pisum similar to Sug CG7334-PA (LOC100160812), partial mRNA	2.69589	1.09626e-10	ACYPI002083
ACYPI006657-RA RefSeq transcript XM_001946658 PREDICTED: Acyrthosiphon pisum similar to CG15890 CG15890-PA (LOC100165728), mRNA	2.69235	4.18157e-09	ACYPI006657
ACYPI28246-RA Glean transcript GLEAN_08246	2.68704	4.27306e-12
ACYPI000970-RA RefSeq transcript XM_001951090 PREDICTED: Acyrthosiphon pisum similar to GA10301-PA (LOC100159613), mRNA	2.68528	0.000480908	ACYPI000970
ACYPI001366-RA RefSeq transcript XM_001947148 PREDICTED: Acyrthosiphon pisum similar to putative amino acid transporter (LOC100160033), partial mRNA	2.68525	7.55273e-11	ACYPI001366
ACYPI48137-RA Glean transcript GLEAN_28137	2.67504	4.61019e-12	ACYPI068465
ACYPI003928-RA RefSeq transcript XM_001944955 PREDICTED: Acyrthosiphon pisum hypothetical protein LOC100162803 (LOC100162803), mRNA	2.67358	1.33639e-16	ACYPI003928	uncharacterized protein
ACYPI009175-RA RefSeq transcript XM_001943479 PREDICTED: Acyrthosiphon pisum hypothetical protein LOC100168480 (LOC100168480), mRNA	2.6729	6.66232e-07	ACYPI009175
ACYPI35175-RA Glean transcript GLEAN_15175	2.66957	8.68498e-13	ACYPI35175	GK21669
ACYPI001199-RA RefSeq transcript XM_001945587 PREDICTED: Acyrthosiphon pisum hypothetical protein LOC100159858 (LOC100159858), mRNA	2.66652	7.40674e-07
ACYPI004747-RA RefSeq transcript XM_001944814 PREDICTED: Acyrthosiphon pisum similar to dihydropyrimidine dehydrogenase (LOC100163680), mRNA	2.66257	8.20784e-11	ACYPI004747
ACYPI31629-RA Glean transcript GLEAN_11629	2.65992	6.32571e-16	ACYPI31629	uncharacterized protein
ACYPI24004-RA Glean transcript GLEAN_04004	2.6588	2.91762e-08
ACYPI40572-RA Glean transcript GLEAN_20572	2.65768	1.22241e-08
ACYPI003803-RA RefSeq transcript XM_001944008 PREDICTED: Acyrthosiphon pisum similar to Cytochrome P450 4V2 (LOC100162661), mRNA	2.64114	1.61478e-08	ACYPI003803
ACYPI000011-RA RefSeq transcript NM_001126143 gi|187103109|ref|NM_001126143.1 Acyrthosiphon pisum carboxypeptidase, vitellogenic-like (Cpvl), mRNA	2.63951	1.21799e-12	ACYPI000011
ACYPI000302-RA RefSeq transcript XM_001949922 PREDICTED: Acyrthosiphon pisum hypothetical protein LOC100158882 (LOC100158882), mRNA	2.63894	3.37936e-14	ACYPI000302	uncharacterized protein
ACYPI34834-RA Glean transcript GLEAN_14834	2.63747	7.0251e-12	ACYPI34834	Zinc finger protein KIAA0543
ACYPI27960-RA Glean transcript GLEAN_07960	2.63544	1.33916e-12	ACYPI27960	Reverse transcriptase
ACYPI001634-RA RefSeq transcript XM_001944723 PREDICTED: Acyrthosiphon pisum similar to fatty acid synthase (LOC100160331), partial mRNA	2.63254	9.76548e-09
ACYPI008077-RA RefSeq transcript XM_001952025 PREDICTED: Acyrthosiphon pisum similar to putative glyoxylate reductase/hydroxypyruvate reductase (LOC100167268), mRNA	2.62638	7.34266e-14	ACYPI008077
ACYPI001252-RA RefSeq transcript XM_001949014 PREDICTED: Acyrthosiphon pisum hypothetical protein LOC100159913 (LOC100159913), mRNA	2.62473	3.36214e-05	ACYPI001252	uncharacterized protein
ACYPI51847-RA Glean transcript GLEAN_31847	2.62146	2.12839e-11	ACYPI51847	uncharacterized protein
ACYPI008920-RA RefSeq transcript XM_001948921 PREDICTED: Acyrthosiphon pisum similar to carboxypeptidase, vitellogenic-like (LOC100168195), mRNA	2.62037	4.39413e-12	ACYPI008920
ACYPI26817-RA Glean transcript GLEAN_06817	2.61918	4.72947e-10
ACYPI000675-RA RefSeq transcript XM_001942611 PREDICTED: Acyrthosiphon pisum similar to g-protein coupled receptor (LOC100159289), partial mRNA	2.61573	6.51461e-12
ACYPI006525-RA RefSeq transcript XM_001943672 PREDICTED: Acyrthosiphon pisum similar to AGAP001412-PA (LOC100165590), mRNA	2.61102	6.87102e-18	ACYPI006525
ACYPI25876-RA Glean transcript GLEAN_05876	2.61085	1.55686e-11
ACYPI008270-RA RefSeq transcript XM_001950238 PREDICTED: Acyrthosiphon pisum similar to juvenile hormone esterase (LOC100167473), mRNA	2.60872	1.67839e-06	ACYPI008270
ACYPI27822-RA Glean transcript GLEAN_07822	2.60705	7.07009e-09	ACYPI27822	chromobox protein homolog 3-like
ACYPI009891-RA RefSeq transcript XM_001949169 PREDICTED: Acyrthosiphon pisum similar to sodium/solute symporter (LOC100169257), mRNA	2.60655	2.53541e-15	ACYPI009891	sodium/solute symporter
ACYPI004670-RA RefSeq transcript XM_001945909 PREDICTED: Acyrthosiphon pisum similar to CLIP-domain serine protease subfamily D (AGAP002422-PA) (LOC100163594), mRNA	2.60641	9.69582e-08	ACYPI004670	Proclotting enzyme
ACYPI54731-RA Glean transcript GLEAN_34731	2.60439	3.03212e-12	ACYPI54731
ACYPI004379-RA RefSeq transcript XM_001944214 PREDICTED: Acyrthosiphon pisum similar to Kruppel protein (LOC100163283), mRNA	2.60408	8.78621e-07	ACYPI004379	Falls into Kruppel clade in ML phylogeny
ACYPI004989-RA RefSeq transcript XM_001948748 PREDICTED: Acyrthosiphon pisum hypothetical protein LOC100163940 (LOC100163940), mRNA	2.60368	8.37913e-06	ACYPI009176
ACYPI001978-RA RefSeq transcript XM_001949351 PREDICTED: Acyrthosiphon pisum similar to phosphoenolpyruvate carboxykinase (LOC100160700), mRNA	2.60232	8.73887e-13	ACYPI001978	phosphoenolpyruvate carboxykinase
ACYPI52681-RA Glean transcript GLEAN_32681	2.60202	2.3943e-09	ACYPI52681
ACYPI39200-RA Glean transcript GLEAN_19200	2.59434	5.32502e-13	ACYPI39200
ACYPI47211-RA Glean transcript GLEAN_27211	2.59272	3.85581e-12	ACYPI47211
ACYPI44060-RA Glean transcript GLEAN_24060	2.59085	1.14451e-12
ACYPI007272-RA RefSeq transcript XM_001946802 PREDICTED: Acyrthosiphon pisum similar to brain tumor protein (LOC100166396), mRNA	2.5875	1.80892e-08	ACYPI007272	Brain tumor protein
ACYPI008911-RA RefSeq transcript XM_001944530 PREDICTED: Acyrthosiphon pisum similar to angiotensin converting enzyme (LOC100168185), mRNA	2.58589	6.79056e-12	ACYPI008911
ACYPI007233-RA RefSeq transcript XM_001949321 PREDICTED: Acyrthosiphon pisum similar to glutathione transferase, theta class (AGAP000761-PA) (LOC100166353), mRNA	2.58521	2.34857e-13	ACYPI007233
ACYPI34098-RA Glean transcript GLEAN_14098	2.58331	6.21429e-10
ACYPI003071-RA RefSeq transcript XM_001951577 PREDICTED: Acyrthosiphon pisum hypothetical protein LOC100161882 (LOC100161882), mRNA	2.57806	9.4669e-07	ACYPI003071	uncharacterized protein
ACYPI51806-RA Glean transcript GLEAN_31806	2.56624	5.20901e-17
ACYPI010017-RA RefSeq transcript XM_001948372 PREDICTED: Acyrthosiphon pisum similar to pore-forming protein MIP family (LOC100169393), mRNA	2.56598	4.80794e-07	ACYPI010017	Neurogenic protein big brain
ACYPI53956-RA Glean transcript GLEAN_33956	2.55874	9.70484e-13	ACYPI53956
ACYPI53639-RA Glean transcript GLEAN_33639	2.55873	2.13687e-10	ACYPI53639	Vascular endothelial growth factor A precursor
ACYPI49800-RA Glean transcript GLEAN_29800	2.55841	8.60232e-11	ACYPI49800
ACYPI27432-RA Glean transcript GLEAN_07432	2.55826	1.18069e-14	ACYPI27432
ACYPI53136-RA Glean transcript GLEAN_33136	2.5533	2.89846e-12	ACYPI53136	GA29176
ACYPI000901-RA RefSeq transcript XM_001946724 PREDICTED: Acyrthosiphon pisum similar to acetyl-coa synthetase (LOC100159541), mRNA	2.55085	1.12041e-08	ACYPI000901
ACYPI008867-RA RefSeq transcript XM_001943706 PREDICTED: Acyrthosiphon pisum similar to AGAP006212-PA (LOC100168141), partial mRNA	2.5492	4.20821e-09	ACYPI008867
ACYPI37548-RA Glean transcript GLEAN_17548	2.54186	5.41511e-10	ACYPI37548	uncharacterized protein
ACYPI001353-RA RefSeq transcript XM_001945048 PREDICTED: Acyrthosiphon pisum similar to odd Oz protein (LOC100160019), mRNA	2.54071	1.83199e-11	ACYPI001353	Teneurin-3
ACYPI53287-RA Glean transcript GLEAN_33287	2.53655	1.26853e-09	ACYPI53287	Anon-63BC-T3
ACYPI008388-RA RefSeq transcript XM_001946896 PREDICTED: Acyrthosiphon pisum similar to methuselah-like (AGAP009453-PA) (LOC100167606), mRNA	2.53634	1.55005e-10	ACYPI008388	class b secretin-like g-protein coupled receptor gprmth4
ACYPI34125-RA Glean transcript GLEAN_14125	2.53621	2.52736e-12
ACYPI42316-RA Glean transcript GLEAN_22316	2.53445	6.80507e-07	ACYPI42316	uncharacterized protein
ACYPI002249-RA RefSeq transcript XM_001951214 PREDICTED: Acyrthosiphon pisum similar to conserved hypothetical protein (LOC100160990), partial mRNA	2.53159	2.76114e-07	ACYPI002249	uncharacterized protein
ACYPI004239-RA RefSeq transcript XM_001943114 PREDICTED: Acyrthosiphon pisum similar to RhoGAP102A CG1748-PA (LOC100163133), mRNA	2.53023	2.70742e-14	ACYPI004239	rho gtpase-activating protein 6 rho-type gtpase-activating protein 6 rho-type gtpase-activating protein rhogapx-1
ACYPI36157-RA Glean transcript GLEAN_16157	2.52856	5.48576e-10
ACYPI32275-RA Glean transcript GLEAN_12275	2.52822	3.62922e-11
ACYPI008490-RA RefSeq transcript XM_001946096 PREDICTED: Acyrthosiphon pisum similar to CG9932 CG9932-PA (LOC100167723), mRNA	2.52728	7.02652e-09
ACYPI009386-RA RefSeq transcript XM_001952630 PREDICTED: Acyrthosiphon pisum similar to CG9518 CG9518-PA (LOC100168708), mRNA	2.52606	1.46487e-08	ACYPI009386
ACYPI42738-RA Glean transcript GLEAN_22738	2.50871	6.75616e-09	ACYPI42738	paired amphipathic helix protein sin3a
ACYPI41784-RA Glean transcript GLEAN_21784	2.50833	3.71068e-15	ACYPI41784	uncharacterized protein
ACYPI008823-RA RefSeq transcript XM_001948025 PREDICTED: Acyrthosiphon pisum similar to AGAP001084-PA (LOC100168092), partial mRNA	2.50039	6.62805e-08	ACYPI008823	Fatty-acyl CoA reductase 1
ACYPI000345-RA RefSeq transcript XM_001951412 PREDICTED: Acyrthosiphon pisum similar to Putative odorant-binding protein A10 precursor (Antennal protein 10) (OS-D protein) (LOC100158928), mRNA	2.49664	5.71921e-15	ACYPI000345	ACYPI000345 protein
ACYPI49583-RA Glean transcript GLEAN_29583	2.49549	5.05723e-11
ACYPI35037-RA Glean transcript GLEAN_15037	2.49253	1.42494e-11
ACYPI001545-RA RefSeq transcript XM_001950289 PREDICTED: Acyrthosiphon pisum similar to phospholipase A2, group VII (platelet-activating factor acetylhydrolase, plasma) (LOC100160230), mRNA	2.49178	3.14399e-09	ACYPI001545
ACYPI38899-RA Glean transcript GLEAN_18899	2.48919	3.91286e-10	ACYPI38899	ORF2 for putative reverse transcriptase
ACYPI009275-RA RefSeq transcript XM_001951753 PREDICTED: Acyrthosiphon pisum similar to Fatty Acid SyNthase family member (fasn-1) (LOC100168590), mRNA	2.48755	4.09814e-09
ACYPI56495-RA Glean transcript GLEAN_36495	2.48236	1.14524e-11	ACYPI085666	uncharacterized protein
ACYPI008372-RA RefSeq transcript XM_001947319 PREDICTED: Acyrthosiphon pisum similar to AGAP000011-PA (LOC100167587), mRNA	2.48192	1.39236e-10	ACYPI008372
ACYPI007903-RA RefSeq transcript XM_001943431 PREDICTED: Acyrthosiphon pisum similar to organic cation transporter (LOC100167082), partial mRNA	2.48095	1.35544e-15	ACYPI007903
ACYPI30186-RA Glean transcript GLEAN_10186	2.47882	1.64364e-10	ACYPI081239
ACYPI42762-RA Glean transcript GLEAN_22762	2.4784	6.71155e-10	ACYPI42762
ACYPI003723-RA RefSeq transcript XM_001945824 PREDICTED: Acyrthosiphon pisum similar to pH sensitive chloride channel (LOC100162577), partial mRNA	2.47835	3.76706e-08	ACYPI003723
ACYPI005757-RA RefSeq transcript XM_001944367 PREDICTED: Acyrthosiphon pisum similar to cryptochrome (LOC100164768), mRNA	2.47451	6.53722e-12
ACYPI006958-RA RefSeq transcript XM_001948048 PREDICTED: Acyrthosiphon pisum similar to transcription factor BmEts (LOC100166054), mRNA	2.47122	1.10951e-12	ACYPI006958	ETS-like proteinous factor
ACYPI003206-RA RefSeq transcript XM_001949433 PREDICTED: Acyrthosiphon pisum similar to SP1070 CG9138-PA (LOC100162025), mRNA	2.4704	2.91696e-08	ACYPI003206	sp1070
ACYPI003579-RA RefSeq transcript XM_001947940 PREDICTED: Acyrthosiphon pisum similar to rab6 GTPase activating protein (LOC100162427), mRNA	2.46261	5.29966e-14	ACYPI003579	rab6 gtpase activating protein
ACYPI005233-RA RefSeq transcript XM_001946401 PREDICTED: Acyrthosiphon pisum similar to AGAP011648-PA (LOC100164198), mRNA	2.46042	1.02574e-11	ACYPI005233	Cadherin 96Ca
ACYPI005752-RA RefSeq transcript XM_001952600 PREDICTED: Acyrthosiphon pisum similar to SD02026p (LOC100164762), partial mRNA	2.45892	2.26575e-08	ACYPI082322
ACYPI23812-RA Glean transcript GLEAN_03812	2.45646	2.96838e-09	ACYPI23812
ACYPI006729-RA RefSeq transcript XM_001948264 PREDICTED: Acyrthosiphon pisum similar to cytochrome P450 CYP302A1 (LOC100165806), mRNA	2.4557	1.50953e-11
ACYPI005161-RA RefSeq transcript XM_001951993 PREDICTED: Acyrthosiphon pisum similar to enoyl Coenzyme A hydratase domain containing 1, transcript variant 1 (LOC100164121), mRNA	2.44966	5.35614e-10
ACYPI40885-RA Glean transcript GLEAN_20885	2.44451	1.07418e-12
ACYPI001471-RA RefSeq transcript XM_001950460 PREDICTED: Acyrthosiphon pisum similar to AGAP007460-PB (LOC100160149), mRNA	2.44103	9.0317e-10	ACYPI001471	Acyl-CoA-binding protein-like protein
ACYPI006650-RA RefSeq transcript XM_001942917 PREDICTED: Acyrthosiphon pisum similar to GA12977-PA (LOC100165721), mRNA	2.43695	1.50128e-09	ACYPI006650
ACYPI002729-RA RefSeq transcript XM_001944600 PREDICTED: Acyrthosiphon pisum similar to mKIAA0609 protein (LOC100161512), mRNA	2.41902	2.03739e-13	ACYPI002729	uncharacterized protein
ACYPI24488-RA Glean transcript GLEAN_04488	2.4166	5.60349e-09	ACYPI24488	uncharacterized protein
ACYPI006263-RA RefSeq transcript XM_001943155 PREDICTED: Acyrthosiphon pisum similar to epoxide hydrolase (LOC100165306), mRNA	2.41112	4.21664e-12	ACYPI006263	epoxide hydrolase
ACYPI008329-RA RefSeq transcript XM_001949939 PREDICTED: Acyrthosiphon pisum similar to Immunoglobulin I-set domain containing protein (LOC100167536), mRNA	2.40906	9.02515e-07
ACYPI45281-RA Glean transcript GLEAN_25281	2.40706	2.8835e-10
ACYPI36985-RA Glean transcript GLEAN_16985	2.40702	7.54101e-10	ACYPI36985
ACYPI007142-RA RefSeq transcript XM_001946687 PREDICTED: Acyrthosiphon pisum hypothetical protein LOC100166257 (LOC100166257), mRNA	2.40573	2.97708e-16
ACYPI43858-RA Glean transcript GLEAN_23858	2.40074	7.33023e-12	ACYPI43858
ACYPI005018-RA RefSeq transcript XM_001952783 PREDICTED: Acyrthosiphon pisum similar to CG2781 CG2781-PA (LOC100163970), mRNA	2.40002	8.9853e-06	ACYPI005018
ACYPI003831-RA RefSeq transcript XM_001944618 PREDICTED: Acyrthosiphon pisum similar to p270 (LOC100162692), mRNA	2.39776	3.28576e-07	ACYPI003831
ACYPI42124-RA Glean transcript GLEAN_22124	2.3967	3.67739e-11
ACYPI009818-RA RefSeq transcript XM_001947834 PREDICTED: Acyrthosiphon pisum similar to zormin CG33484-PD (LOC100169177), mRNA	2.3963	2.12744e-16	ACYPI009818
ACYPI006720-RA RefSeq transcript XM_001944604 PREDICTED: Acyrthosiphon pisum similar to Ptp52F CG18243-PA (LOC100165796), mRNA	2.39076	1.62227e-07	ACYPI006720	Protein-tyrosine phosphatase
ACYPI46402-RA Glean transcript GLEAN_26402	2.38256	5.42306e-14	ACYPI46402
ACYPI000123-RA RefSeq transcript XM_001948675 PREDICTED: Acyrthosiphon pisum similar to GlcAT-P CG6207-PA (LOC100158683), mRNA	2.38097	8.88589e-14	ACYPI000123
ACYPI004259-RA RefSeq transcript XM_001943506 PREDICTED: Acyrthosiphon pisum similar to radish CG4346-PA (LOC100163155), mRNA	2.37436	6.12741e-09	ACYPI004259
ACYPI53283-RA Glean transcript GLEAN_33283	2.3713	2.28828e-10
ACYPI54203-RA Glean transcript GLEAN_34203	2.37068	3.30917e-09	ACYPI54203
ACYPI23032-RA Glean transcript GLEAN_03032	2.36984	1.27785e-09
ACYPI006353-RA RefSeq transcript XM_001945699 PREDICTED: Acyrthosiphon pisum hypothetical protein LOC100165400 (LOC100165400), mRNA	2.36555	2.78811e-10	ACYPI006353
ACYPI001286-RA RefSeq transcript XM_001947214 PREDICTED: Acyrthosiphon pisum similar to pipsqueak (LOC100159948), mRNA	2.36311	7.3647e-14	ACYPI001286	pipsqueak
ACYPI54019-RA Glean transcript GLEAN_34019	2.36219	7.52119e-12	ACYPI54019	Transposable element Tc3 transposase
ACYPI000937-RA RefSeq transcript XM_001949790 PREDICTED: Acyrthosiphon pisum similar to dynein heavy chain (LOC100159578), partial mRNA	2.36187	6.42271e-08	ACYPI000937
ACYPI008821-RA RefSeq transcript XM_001944508 PREDICTED: Acyrthosiphon pisum similar to acyl-CoA oxidase (LOC100168090), partial mRNA	2.35714	1.14627e-07	ACYPI008821	Acyl-CoA oxidase
ACYPI51233-RA Glean transcript GLEAN_31233	2.35575	2.12285e-11	ACYPI51233	uncharacterized protein
ACYPI001760-RA RefSeq transcript XM_001945756 PREDICTED: Acyrthosiphon pisum similar to mannosidase, beta A, lysosomal (LOC100160465), mRNA	2.35336	1.8758e-15	ACYPI001760
ACYPI009863-RA RefSeq transcript XM_001947146 PREDICTED: Acyrthosiphon pisum similar to XK-related protein 6 (LOC100169224), mRNA	2.35106	1.89808e-07	ACYPI009863
ACYPI002651-RA RefSeq transcript XM_001944616 PREDICTED: Acyrthosiphon pisum similar to pasilla CG16765-PK (LOC100161431), partial mRNA	2.34963	3.10938e-12	ACYPI26223
ACYPI006814-RA RefSeq transcript XM_001948827 PREDICTED: Acyrthosiphon pisum similar to Putative phospholipase B-like 2 precursor (Lamina ancestor homolog 2) (LAMA-like protein 2) (76 kDa protein) (p76) (66.3 kDa protein) (LOC100165900), mRNA	2.3477	3.87548e-12	ACYPI006814
ACYPI41348-RA Glean transcript GLEAN_21348	2.34445	1.20316e-11	ACYPI41348
ACYPI33925-RA Glean transcript GLEAN_13925	2.3441	2.67115e-09	ACYPI33925
ACYPI003423-RA RefSeq transcript XM_001944069 PREDICTED: Acyrthosiphon pisum similar to fragile X mental retardation syndrome-related protein 1, putative (LOC100162261), mRNA	2.33982	3.46891e-17	ACYPI003423
ACYPI004341-RA RefSeq transcript XM_001945144 PREDICTED: Acyrthosiphon pisum similar to hyaluronan receptor RHAMMV5 (LOC100163242), mRNA	2.3375	0.00015692	ACYPI004341	hyaluronan receptor RHAMMV5
ACYPI001133-RA RefSeq transcript XM_001952555 PREDICTED: Acyrthosiphon pisum similar to eiger CG12919-PA (LOC100159786), mRNA	2.3368	3.59975e-12	ACYPI001133	tribolium_TC013579
ACYPI51398-RA Glean transcript GLEAN_31398	2.33653	1.96469e-09	ACYPI25230	Collagen alpha-1(XI) chain
ACYPI26776-RA Glean transcript GLEAN_06776	2.33454	6.15554e-06	ACYPI26776	Neuronal nicotinic acetylcholine receptor alpha-3
ACYPI002868-RA RefSeq transcript XM_001949046 PREDICTED: Acyrthosiphon pisum similar to Y64G10A.7 (LOC100161662), partial mRNA	2.3345	1.06515e-12	ACYPI002868	uncharacterized protein
ACYPI49127-RA Glean transcript GLEAN_29127	2.33167	2.11377e-10	ACYPI49127
ACYPI21540-RA Glean transcript GLEAN_01540	2.33058	3.58064e-11	ACYPI21540
ACYPI008967-RA RefSeq transcript XM_001950966 PREDICTED: Acyrthosiphon pisum similar to glutamyl aminopeptidase (LOC100168247), mRNA	2.328	2.42412e-09
ACYPI007650-RA RefSeq transcript XM_001948514 PREDICTED: Acyrthosiphon pisum similar to predicted protein (LOC100166809), mRNA	2.32531	3.75258e-08	ACYPI007650	beta-galactosidase precursor
ACYPI42446-RA Glean transcript GLEAN_22446	2.31827	6.27424e-11
ACYPI30630-RA Glean transcript GLEAN_10630	2.31786	3.74206e-11	ACYPI30630
ACYPI009980-RA RefSeq transcript XM_001950355 PREDICTED: Acyrthosiphon pisum similar to beta-N-acetylglucosaminidase NAG2 (LOC100169353), mRNA	2.31731	8.22364e-13	ACYPI009980	Beta-N-acetylglucosaminidase NAG2
ACYPI002540-RA RefSeq transcript XM_001950836 PREDICTED: Acyrthosiphon pisum similar to CG9706 CG9706-PA (LOC100161308), mRNA	2.31634	4.0291e-09	ACYPI002540	acetyl-coenzyme a transporter
ACYPI004070-RA RefSeq transcript XM_001945049 PREDICTED: Acyrthosiphon pisum similar to organic cation transporter (LOC100162951), mRNA	2.31451	6.13682e-19	ACYPI004070
ACYPI38809-RA Glean transcript GLEAN_18809	2.3125	4.68741e-06	ACYPI38809	Transposase
ACYPI26177-RA Glean transcript GLEAN_06177	2.3105	4.53346e-13
ACYPI000176-RA RefSeq transcript XM_001944495 PREDICTED: Acyrthosiphon pisum similar to cytochrome P450 4A7 (LOC100158738), mRNA	2.30791	5.05661e-08	ACYPI000176
ACYPI003852-RA RefSeq transcript XM_001946807 PREDICTED: Acyrthosiphon pisum similar to AGAP000211-PA (LOC100162715), mRNA	2.30777	4.58703e-07	ACYPI003852	pancreatic triacylglycerol lipase
ACYPI006523-RA RefSeq transcript XM_001952011 PREDICTED: Acyrthosiphon pisum similar to AGAP007846-PA (LOC100165587), mRNA	2.30696	8.62691e-09	ACYPI006523
ACYPI005513-RA RefSeq transcript XM_001943986 PREDICTED: Acyrthosiphon pisum similar to Steroid receptor seven-up, isoforms B/C (Nuclear receptor subfamily 2 group F member 3, isoforms B/C) (LOC100164500), mRNA	2.30371	4.94259e-10	ACYPI005513	Nuclear receptor subfamily 2 group F member 6
ACYPI001738-RA RefSeq transcript XM_001949909 PREDICTED: Acyrthosiphon pisum similar to lambda-crystallin (LOC100160442), mRNA	2.29867	9.78369e-17	ACYPI001738
ACYPI48118-RA Glean transcript GLEAN_28118	2.29752	3.69185e-06	ACYPI48118
ACYPI003248-RA RefSeq transcript XM_001943445 PREDICTED: Acyrthosiphon pisum similar to citron (LOC100162068), mRNA	2.29578	7.73382e-06	ACYPI003248	citron
ACYPI42498-RA Glean transcript GLEAN_22498	2.29537	2.99914e-13	ACYPI42498	uncharacterized protein
ACYPI002864-RA RefSeq transcript XM_001943953 PREDICTED: Acyrthosiphon pisum similar to rhotekin (LOC100161658), mRNA	2.29513	2.11737e-09	ACYPI002864	Rhotekin
ACYPI000219-RA RefSeq transcript XM_001949652 PREDICTED: Acyrthosiphon pisum similar to CG7102 CG7102-PA (LOC100158785), mRNA	2.29408	3.83353e-07	ACYPI000219
ACYPI007854-RA RefSeq transcript XM_001942572 PREDICTED: Acyrthosiphon pisum hypothetical protein LOC100167030 (LOC100167030), mRNA	2.29126	7.33168e-06	ACYPI007854	uncharacterized protein
ACYPI51926-RA Glean transcript GLEAN_31926	2.29085	2.29151e-07
ACYPI25230-RA Glean transcript GLEAN_05230	2.29015	2.50759e-08	ACYPI25230	Collagen alpha-1(XI) chain
ACYPI39674-RA Glean transcript GLEAN_19674	2.28963	1.87614e-11	ACYPI39674
ACYPI28183-RA Glean transcript GLEAN_08183	2.28052	1.26318e-09
ACYPI007196-RA RefSeq transcript XM_001946948 PREDICTED: Acyrthosiphon pisum similar to ribonuclease t2 (LOC100166313), mRNA	2.27806	7.74134e-16	ACYPI007196
ACYPI46230-RA Glean transcript GLEAN_26230	2.27515	1.80531e-09	ACYPI46230	Endonuclease-reverse transcriptase
ACYPI49682-RA Glean transcript GLEAN_29682	2.27334	2.83585e-08
ACYPI008710-RA RefSeq transcript XM_001948801 PREDICTED: Acyrthosiphon pisum similar to ring canal kelch protein (LOC100167966), mRNA	2.2714	1.60078e-18	ACYPI008710
ACYPI27172-RA Glean transcript GLEAN_07172	2.26867	8.28359e-07	ACYPI27172
ACYPI005413-RA RefSeq transcript XM_001947197 PREDICTED: Acyrthosiphon pisum similar to transglutaminase (LOC100164391), mRNA	2.26841	6.97697e-07
ACYPI002180-RA RefSeq transcript XM_001950466 PREDICTED: Acyrthosiphon pisum similar to GA12802-PA (LOC100160914), mRNA	2.26678	1.82493e-14	ACYPI002180
ACYPI26472-RA Glean transcript GLEAN_06472	2.26407	0.000126609	ACYPI26472	fatty acid synthase
ACYPI52595-RA Glean transcript GLEAN_32595	2.26022	1.30389e-08	ACYPI52595	endonuclease and reverse transcriptase-like protein
ACYPI004055-RA RefSeq transcript XM_001950495 PREDICTED: Acyrthosiphon pisum similar to laminin alpha-1, 2 chain (LOC100162936), partial mRNA	2.25926	2.29336e-07	ACYPI004055
ACYPI001189-RA RefSeq transcript XM_001944557 PREDICTED: Acyrthosiphon pisum similar to CG14141 CG14141-PA, transcript variant 1 (LOC100159848), mRNA	2.25584	4.00012e-14	ACYPI001189
ACYPI008880-RA RefSeq transcript XM_001950092 PREDICTED: Acyrthosiphon pisum similar to neuralized (LOC100168154), mRNA	2.25536	8.71294e-08	ACYPI008880	neur
ACYPI44435-RA Glean transcript GLEAN_24435	2.25476	1.40717e-09	ACYPI44435
ACYPI25395-RA Glean transcript GLEAN_05395	2.25429	5.59047e-08
ACYPI003344-RA RefSeq transcript XM_001947471 PREDICTED: Acyrthosiphon pisum similar to elongase, putative (LOC100162176), mRNA	2.25248	1.17264e-11	ACYPI003344
ACYPI010057-RA RefSeq transcript XM_001947498 PREDICTED: Acyrthosiphon pisum similar to neither inactivation nor afterpotential D, putative (LOC100169440), mRNA	2.25235	1.43725e-10	ACYPI010057
ACYPI004885-RA RefSeq transcript XM_001949228 PREDICTED: Acyrthosiphon pisum similar to ATP-binding cassette sub-family G member 1 (White protein homolog) (ATP-binding cassette transporter 8) (LOC100163828), mRNA	2.24875	4.21968e-17	ACYPI004885	SD06390p
ACYPI41712-RA Glean transcript GLEAN_21712	2.2471	4.89271e-06	ACYPI41712	mitochondrial ribosomal protein l37
ACYPI000207-RA RefSeq transcript XM_001946936 PREDICTED: Acyrthosiphon pisum similar to AGAP007198-PB (LOC100158772), mRNA	2.2416	1.46284e-20	ACYPI000207	AGAP007198-PB
ACYPI001839-RA RefSeq transcript XM_001951130 PREDICTED: Acyrthosiphon pisum similar to CG32580 CG32580-PA (LOC100160550), mRNA	2.24107	3.17215e-12	ACYPI001839
ACYPI55886-RA Glean transcript GLEAN_35886	2.24089	1.7791e-12
ACYPI53492-RA Glean transcript GLEAN_33492	2.24067	1.59696e-05	ACYPI53492	uncharacterized protein
ACYPI008010-RA RefSeq transcript XM_001943889 PREDICTED: Acyrthosiphon pisum similar to ca-activated cl channel protein (LOC100167197), mRNA	2.24043	6.67886e-08	ACYPI008010
ACYPI34957-RA Glean transcript GLEAN_14957	2.23985	1.02931e-09	ACYPI34957
ACYPI006314-RA RefSeq transcript XM_001944309 PREDICTED: Acyrthosiphon pisum similar to transglutaminase (LOC100165360), mRNA	2.23953	1.02273e-05	ACYPI006314	hemocyte protein-glutamine gamma-glutamyltransferase
ACYPI004796-RA RefSeq transcript XM_001946625 PREDICTED: Acyrthosiphon pisum hypothetical protein LOC100163734 (LOC100163734), mRNA	2.23735	1.90066e-06	ACYPI004796	uncharacterized protein
ACYPI40836-RA Glean transcript GLEAN_20836	2.23367	3.95769e-08	ACYPI40836	Broad-complex core protein isoforms 1/2/3/4/5
ACYPI24522-RA Glean transcript GLEAN_04522	2.23364	2.89907e-09
ACYPI52982-RA Glean transcript GLEAN_32982	2.2293	1.59132e-15
ACYPI003463-RA RefSeq transcript XM_001946730 PREDICTED: Acyrthosiphon pisum similar to phosphoglycerate mutase (LOC100162303), mRNA	2.22891	2.42984e-11	ACYPI003463	Phosphoglycerate mutase 2
ACYPI005630-RA RefSeq transcript XM_001951990 PREDICTED: Acyrthosiphon pisum similar to T10H9.4, transcript variant 1 (LOC100164636), mRNA	2.22856	2.14368e-11	ACYPI005630
ACYPI45499-RA Glean transcript GLEAN_25499	2.22815	1.87355e-09
ACYPI003223-RA RefSeq transcript XM_001949809 PREDICTED: Acyrthosiphon pisum hypothetical protein LOC100162042 (LOC100162042), mRNA	2.22391	1.64309e-14	ACYPI003223
ACYPI38328-RA Glean transcript GLEAN_18328	2.22355	4.06535e-14
ACYPI55270-RA Glean transcript GLEAN_35270	2.22351	3.04402e-11
ACYPI52562-RA Glean transcript GLEAN_32562	2.22252	1.70333e-10	ACYPI52562	uncharacterized protein
ACYPI007374-RA RefSeq transcript XM_001945678 PREDICTED: Acyrthosiphon pisum similar to AGAP001111-PA (LOC100166509), mRNA	2.21942	2.82292e-09	ACYPI007374	uncharacterized protein
ACYPI002399-RA RefSeq transcript XM_001946189 PREDICTED: Acyrthosiphon pisum similar to laccase 1 (LOC100161156), mRNA	2.21533	2.6958e-09	ACYPI002399	Laccase-4
ACYPI26757-RA Glean transcript GLEAN_06757	2.21314	8.77836e-05	ACYPI26757
ACYPI46007-RA Glean transcript GLEAN_26007	2.20924	7.46495e-10	ACYPI083795
ACYPI41012-RA Glean transcript GLEAN_21012	2.20836	4.21022e-07	ACYPI41012	uncharacterized protein
ACYPI009298-RA RefSeq transcript XM_001946444 PREDICTED: Acyrthosiphon pisum similar to sugar transporter (LOC100168616), mRNA	2.20739	2.85764e-10	ACYPI009298	Sugar transporter 4
ACYPI005174-RA RefSeq transcript XM_001943560 PREDICTED: Acyrthosiphon pisum similar to CG9492 CG9492-PA (LOC100164135), partial mRNA	2.20103	8.01008e-09	ACYPI005174
ACYPI006565-RA RefSeq transcript XM_001952622 PREDICTED: Acyrthosiphon pisum similar to Notum CG13076-PB (LOC100165630), mRNA	2.2002	4.50767e-07	ACYPI006565	notum
ACYPI006317-RA RefSeq transcript XM_001947890 PREDICTED: Acyrthosiphon pisum similar to AMP dependent coa ligase (LOC100165363), mRNA	2.19997	2.45994e-07	ACYPI006317	amp dependent coa ligase
ACYPI007867-RA RefSeq transcript XM_001952441 PREDICTED: Acyrthosiphon pisum similar to calmodulin-binding protein trpl (LOC100167043), partial mRNA	2.19838	4.59316e-07	ACYPI008192	Transient-receptor-potential-like protein
ACYPI22143-RA Glean transcript GLEAN_02143	2.19789	1.67206e-10
ACYPI29574-RA Glean transcript GLEAN_09574	2.19329	3.50596e-08
ACYPI21464-RA Glean transcript GLEAN_01464	2.19041	6.08395e-10	ACYPI21464
ACYPI51566-RA Glean transcript GLEAN_31566	2.18979	4.15288e-06
ACYPI005918-RA RefSeq transcript XM_001944641 PREDICTED: Acyrthosiphon pisum similar to adenylate cyclase (LOC100164940), mRNA	2.18805	5.81858e-09	ACYPI005918	Adenylate cyclase
ACYPI41704-RA Glean transcript GLEAN_21704	2.18659	0.000209883
ACYPI005554-RA RefSeq transcript XM_001952647 PREDICTED: Acyrthosiphon pisum similar to SRY-box containing gene 2 (LOC100164548), mRNA	2.18476	5.45903e-07	ACYPI005554	SOX2_HUMAN
ACYPI007475-RA RefSeq transcript XM_001942548 PREDICTED: Acyrthosiphon pisum similar to GA17497-PA (LOC100166618), partial mRNA	2.18293	5.19403e-08	ACYPI007475
ACYPI004686-RA RefSeq transcript XM_001943612 PREDICTED: Acyrthosiphon pisum similar to CYCLE (LOC100163611), mRNA	2.18284	1.59523e-11	ACYPI004686
ACYPI35829-RA Glean transcript GLEAN_15829	2.18213	5.88789e-11
ACYPI000174-RA RefSeq transcript XM_001944469 PREDICTED: Acyrthosiphon pisum similar to AGAP007667-PA (LOC100158736), mRNA	2.18078	1.38991e-07	ACYPI000174	sugar transporter
ACYPI007332-RA RefSeq transcript XM_001944735 PREDICTED: Acyrthosiphon pisum similar to AGAP010560-PA (LOC100166464), partial mRNA	2.18007	3.78577e-10
ACYPI53593-RA Glean transcript GLEAN_33593	2.17955	1.54876e-05	ACYPI53593	poly [ADP-ribose] polymerase 12-like
ACYPI002244-RA RefSeq transcript XM_001950033 PREDICTED: Acyrthosiphon pisum similar to alaserpin (LOC100160985), mRNA	2.17858	8.22684e-07	ACYPI002244	Alaserpin
ACYPI46625-RA Glean transcript GLEAN_26625	2.17288	1.93615e-09	ACYPI55258
ACYPI009163-RA RefSeq transcript XM_001949460 PREDICTED: Acyrthosiphon pisum similar to conserved hypothetical protein (LOC100168465), mRNA	2.17007	1.06625e-13	ACYPI009163	septin-2
ACYPI002665-RA RefSeq transcript XM_001949588 PREDICTED: Acyrthosiphon pisum similar to beadex/dLMO protein (LOC100161445), mRNA	2.16995	3.09049e-07	ACYPI002665	beadex/dlmo protein
ACYPI009466-RA RefSeq transcript XM_001944819 PREDICTED: Acyrthosiphon pisum similar to AGAP011450-PA (LOC100168792), mRNA	2.16929	0.000547591	ACYPI009466
ACYPI008228-RA RefSeq transcript XM_001948572 PREDICTED: Acyrthosiphon pisum similar to cytochrome P450 monooxygenase (LOC100167431), mRNA	2.16911	4.8764e-13	ACYPI008228
ACYPI39792-RA Glean transcript GLEAN_19792	2.16852	1.29299e-14	ACYPI39792	protein Phum_PHUM454910
ACYPI20332-RA Glean transcript GLEAN_00332	2.16701	8.03566e-09	ACYPI20332	Endonuclease and reverse transcriptase-like protein
ACYPI29975-RA Glean transcript GLEAN_09975	2.16414	1.68346e-05	ACYPI29975	DNA methyltransferase 3
ACYPI002754-RA RefSeq transcript XM_001948531 PREDICTED: Acyrthosiphon pisum similar to vasorin (LOC100161538), mRNA	2.16406	8.90985e-09	ACYPI002754	Tollo
ACYPI008192-RA RefSeq transcript XM_001946228 PREDICTED: Acyrthosiphon pisum similar to calmodulin-binding protein trpl (LOC100167393), partial mRNA	2.16376	2.43679e-10	ACYPI008192	Transient-receptor-potential-like protein
ACYPI21992-RA Glean transcript GLEAN_01992	2.16233	5.5806e-10
ACYPI003473-RA RefSeq transcript XM_001948753 PREDICTED: Acyrthosiphon pisum similar to CG9395 CG9395-PA (LOC100162314), mRNA	2.16226	1.73521e-12	ACYPI003473
ACYPI25324-RA Glean transcript GLEAN_05324	2.16209	2.7709e-08	ACYPI25324
ACYPI003804-RA RefSeq transcript XM_001952092 PREDICTED: Acyrthosiphon pisum similar to AGAP012016-PA (LOC100162662), mRNA	2.15846	4.72656e-08	ACYPI003804
ACYPI008620-RA RefSeq transcript XM_001943470 PREDICTED: Acyrthosiphon pisum hypothetical protein LOC100167866 (LOC100167866), mRNA	2.15591	1.09986e-12	ACYPI008620	uncharacterized protein
ACYPI53955-RA Glean transcript GLEAN_33955	2.15537	2.17618e-10
ACYPI45930-RA Glean transcript GLEAN_25930	2.15174	2.91762e-08	ACYPI45930
ACYPI006696-RA RefSeq transcript XM_001951018 PREDICTED: Acyrthosiphon pisum similar to luciferin-regenerating enzyme (LOC100165771), mRNA	2.15139	1.06938e-15	ACYPI006696
ACYPI009481-RA RefSeq transcript XM_001948506 PREDICTED: Acyrthosiphon pisum similar to WNT3 precursor, putative (LOC100168810), mRNA	2.15046	0.000188964	ACYPI009481	Protein Wnt
ACYPI001962-RA RefSeq transcript XM_001945141 PREDICTED: Acyrthosiphon pisum similar to alcohol dehydrogenase (LOC100160682), mRNA	2.14844	7.64061e-11	ACYPI000484	Glucose dehydrogenase [acceptor]
ACYPI52344-RA Glean transcript GLEAN_32344	2.14771	6.22057e-08	ACYPI52344	outer dense fiber protein 3B-like
ACYPI26268-RA Glean transcript GLEAN_06268	2.1467	1.18843e-09
ACYPI28490-RA Glean transcript GLEAN_08490	2.14406	3.06186e-09	ACYPI28490
ACYPI35498-RA Glean transcript GLEAN_15498	2.14299	3.43523e-10	ACYPI35498	uncharacterized protein
ACYPI003056-RA RefSeq transcript XM_001944546 PREDICTED: Acyrthosiphon pisum similar to modular serine protease zymogen (LOC100161864), mRNA	2.14236	1.30302e-10	ACYPI003056
ACYPI45497-RA Glean transcript GLEAN_25497	2.13986	1.70013e-08	ACYPI45497
ACYPI006258-RA RefSeq transcript XM_001944794 PREDICTED: Acyrthosiphon pisum similar to GA21321-PA (LOC100165301), mRNA	2.13873	1.69655e-06	ACYPI006258
ACYPI24701-RA Glean transcript GLEAN_04701	2.13797	0.000278281
ACYPI004186-RA RefSeq transcript XM_001952694 PREDICTED: Acyrthosiphon pisum similar to Bardet-Biedl syndrome 7 (LOC100163075), mRNA	2.13423	4.39744e-13	ACYPI004186	Bardet-Biedl syndrome 7 protein
ACYPI51627-RA Glean transcript GLEAN_31627	2.13356	0.000458852	ACYPI51627	Protein gooseberry-neuro
ACYPI26438-RA Glean transcript GLEAN_06438	2.12532	3.97698e-07
ACYPI005999-RA RefSeq transcript XM_001942834 PREDICTED: Acyrthosiphon pisum similar to CG15828 CG15828-PA (LOC100165025), partial mRNA	2.1241	1.43886e-11
ACYPI008096-RA RefSeq transcript XM_001949063 PREDICTED: Acyrthosiphon pisum similar to Protogenin B (LOC100167288), mRNA	2.12367	6.81626e-10	ACYPI008096	uncharacterized protein
ACYPI002308-RA RefSeq transcript XM_001949064 PREDICTED: Acyrthosiphon pisum similar to plexin A CG11081-PA (LOC100161054), mRNA	2.12312	4.45015e-13
ACYPI45228-RA Glean transcript GLEAN_25228	2.12204	7.11039e-07
ACYPI52864-RA Glean transcript GLEAN_32864	2.12057	1.3715e-15	ACYPI52864
ACYPI42102-RA Glean transcript GLEAN_22102	2.11888	1.07217e-07
ACYPI21902-RA Glean transcript GLEAN_01902	2.11783	1.87355e-09	ACYPI21902	uncharacterized protein
ACYPI36458-RA Glean transcript GLEAN_16458	2.11714	3.7639e-09
ACYPI45156-RA Glean transcript GLEAN_25156	2.11663	4.36966e-08	ACYPI45156
ACYPI34504-RA Glean transcript GLEAN_14504	2.11573	2.57136e-06	ACYPI34504
ACYPI001490-RA RefSeq transcript XM_001943111 PREDICTED: Acyrthosiphon pisum similar to CG31048 CG31048-PA (LOC100160173), mRNA	2.11465	6.09821e-11	ACYPI001490	Dedicator of cytokinesis protein 3
ACYPI006066-RA RefSeq transcript XM_001944507 PREDICTED: Acyrthosiphon pisum similar to Multidrug-Resistance like Protein 1 CG6214-PK (LOC100165098), mRNA	2.10812	5.03956e-15	ACYPI006066
ACYPI005661-RA RefSeq transcript XM_001952573 PREDICTED: Acyrthosiphon pisum similar to zinc finger, SWIM domain containing 5 (LOC100164670), mRNA	2.10808	4.09277e-10	ACYPI005661	zinc finger swim domain-containing protein
ACYPI002374-RA RefSeq transcript XM_001947226 PREDICTED: Acyrthosiphon pisum similar to polyprotein (LOC100161125), partial mRNA	2.10629	1.11559e-06	ACYPI002374	gag-pol polyprotein precursor
ACYPI38832-RA Glean transcript GLEAN_18832	2.10458	0.000466626	ACYPI38832	uncharacterized protein
ACYPI003217-RA RefSeq transcript XM_001949141 PREDICTED: Acyrthosiphon pisum hypothetical protein LOC100162036 (LOC100162036), mRNA	2.10286	0.0106785	ACYPI082233	uncharacterized protein
ACYPI22018-RA Glean transcript GLEAN_02018	2.1027	1.85957e-07
ACYPI44822-RA Glean transcript GLEAN_24822	2.10208	2.30972e-08	ACYPI44822	GA22538
ACYPI000889-RA RefSeq transcript XM_001944563 PREDICTED: Acyrthosiphon pisum similar to cuticular protein 124, RR-2 family (AGAP003390-PA) (LOC100159526), mRNA	2.10178	0.00399579	ACYPI000889	drosmel_CG1259-PB
ACYPI001386-RA RefSeq transcript XM_001951049 PREDICTED: Acyrthosiphon pisum similar to reverse transcriptase (put.); putative (LOC100160054), mRNA	2.10155	4.47671e-05	ACYPI001386	F-element protein
ACYPI001449-RA RefSeq transcript XM_001945811 PREDICTED: Acyrthosiphon pisum similar to Rgk1 CG9811-PA (LOC100160125), partial mRNA	2.10049	1.3001e-07	ACYPI001449	GTP-binding protein RAD
ACYPI25362-RA Glean transcript GLEAN_05362	2.10037	9.43285e-10	ACYPI25362	ORF2 for putative reverse transcriptase
ACYPI29197-RA Glean transcript GLEAN_09197	2.09868	0.00018781	ACYPI26472	fatty acid synthase
ACYPI009284-RA RefSeq transcript XM_001946271 PREDICTED: Acyrthosiphon pisum similar to AGAP007920-PA (LOC100168601), partial mRNA	2.09732	8.36826e-07	ACYPI009284
ACYPI000394-RA RefSeq transcript XM_001945384 PREDICTED: Acyrthosiphon pisum similar to AGAP004723-PA (LOC100158979), mRNA	2.09493	1.16676e-05	ACYPI000394	AGAP004723-PA
ACYPI005379-RA RefSeq transcript XM_001946270 PREDICTED: Acyrthosiphon pisum similar to viral A-type inclusion protein, putative (LOC100164356), mRNA	2.09454	5.65604e-10	ACYPI005379
ACYPI006668-RA RefSeq transcript XM_001947046 PREDICTED: Acyrthosiphon pisum similar to CG32809 CG32809-PD (LOC100165739), mRNA	2.09423	2.8436e-07	ACYPI006668	uncharacterized protein
ACYPI004593-RA RefSeq transcript XM_001945203 PREDICTED: Acyrthosiphon pisum similar to CG8507 CG8507-PA (LOC100163508), mRNA	2.09205	4.9326e-13	ACYPI004593	Alpha-2-macroglobulin receptor-associated protein
ACYPI005362-RA RefSeq transcript XM_001944018 PREDICTED: Acyrthosiphon pisum similar to fragile X mental retardation syndrome-related protein 1, putative (LOC100164334), partial mRNA	2.0917	6.29224e-18	ACYPI005362
ACYPI002130-RA RefSeq transcript XM_001948651 PREDICTED: Acyrthosiphon pisum similar to CG10993-like protein (LOC100160862), mRNA	2.09145	1.44327e-18	ACYPI002130	uncharacterized protein
ACYPI004313-RA RefSeq transcript XM_001948119 PREDICTED: Acyrthosiphon pisum similar to DUNC79 (LOC100163213), mRNA	2.09009	5.54453e-12	ACYPI004313
ACYPI002821-RA RefSeq transcript XM_001946562 PREDICTED: Acyrthosiphon pisum similar to AGAP005710-PA (LOC100161610), mRNA	2.08706	6.07395e-19	ACYPI002821	Prominin-like protein
ACYPI007710-RA RefSeq transcript XM_001950750 PREDICTED: Acyrthosiphon pisum similar to CG6330 CG6330-PB (LOC100166871), mRNA	2.08607	6.72281e-12	ACYPI007710
ACYPI005742-RA RefSeq transcript XM_001949180 PREDICTED: Acyrthosiphon pisum hypothetical protein LOC100164752 (LOC100164752), mRNA	2.08513	0.00109091	ACYPI083810	uncharacterized protein
ACYPI37852-RA Glean transcript GLEAN_17852	2.083	1.8096e-10
ACYPI56339-RA Glean transcript GLEAN_36339	2.08284	3.00298e-14	ACYPI56339	uncharacterized protein
ACYPI008484-RA RefSeq transcript XM_001945995 PREDICTED: Acyrthosiphon pisum similar to AGAP001477-PA (LOC100167717), mRNA	2.08263	7.10125e-09	ACYPI008484
ACYPI23170-RA Glean transcript GLEAN_03170	2.0821	2.78128e-10
ACYPI000333-RA RefSeq transcript XM_001946125 PREDICTED: Acyrthosiphon pisum similar to MGC81406 protein (LOC100158916), mRNA	2.08093	3.17211e-06	ACYPI000333
ACYPI007661-RA RefSeq transcript XM_001951485 PREDICTED: Acyrthosiphon pisum similar to CG32062 CG32062-PE (LOC100166821), mRNA	2.07875	7.70432e-12
ACYPI005199-RA RefSeq transcript XM_001951005 PREDICTED: Acyrthosiphon pisum similar to glutamyl aminopeptidase (LOC100164161), mRNA	2.0787	2.49041e-09	ACYPI005199	Glutamyl aminopeptidase
ACYPI56535-RA Glean transcript GLEAN_36535	2.07818	1.36028e-10	ACYPI56535	endonuclease and reverse transcriptase-like protein
ACYPI54243-RA Glean transcript GLEAN_34243	2.07746	1.68203e-17
ACYPI008935-RA RefSeq transcript XM_001943207 PREDICTED: Acyrthosiphon pisum similar to GATA transcription factor alpha (LOC100168211), mRNA	2.07132	8.0128e-08	ACYPI008935	Transcription factor BCFI
ACYPI44565-RA Glean transcript GLEAN_24565	2.07109	9.70771e-07	ACYPI44565	uncharacterized protein
ACYPI40863-RA Glean transcript GLEAN_20863	2.06855	7.50888e-09	ACYPI40863
ACYPI33704-RA Glean transcript GLEAN_13704	2.06802	2.06077e-10
ACYPI002017-RA RefSeq transcript XM_001944056 PREDICTED: Acyrthosiphon pisum similar to phosphatidylinositol transfer protein (LOC100160745), mRNA	2.068	1.56868e-10	ACYPI002017
ACYPI009420-RA RefSeq transcript XM_001947251 PREDICTED: Acyrthosiphon pisum similar to torso-like protein (LOC100168743), mRNA	2.06791	6.22765e-15	ACYPI009420
ACYPI007018-RA RefSeq transcript XM_001944533 PREDICTED: Acyrthosiphon pisum similar to Vesicular glutamate transporter CG9887-PA (LOC100166118), mRNA	2.06775	3.22112e-12	ACYPI008883
ACYPI35831-RA Glean transcript GLEAN_15831	2.06739	1.01189e-07
ACYPI51187-RA Glean transcript GLEAN_31187	2.06491	2.50405e-07	ACYPI51187
ACYPI29561-RA Glean transcript GLEAN_09561	2.05992	6.58826e-08
ACYPI005277-RA RefSeq transcript XM_001947277 PREDICTED: Acyrthosiphon pisum similar to elongase, putative (LOC100164244), mRNA	2.05901	5.64137e-10	ACYPI005277	AGAP007264-PA
ACYPI20156-RA Glean transcript GLEAN_00156	2.05535	2.53686e-10	ACYPI20156
ACYPI008481-RA RefSeq transcript XM_001947650 PREDICTED: Acyrthosiphon pisum similar to Zinc finger FYVE domain-containing protein 28 (LOC100167714), mRNA	2.05522	6.08395e-10	ACYPI008481
ACYPI32177-RA Glean transcript GLEAN_12177	2.05143	3.0713e-09	ACYPI32177	uncharacterized protein
ACYPI005542-RA RefSeq transcript XM_001948123 PREDICTED: Acyrthosiphon pisum similar to mediator complex subunit rgr-1 (LOC100164533), mRNA	2.0487	1.51007e-13	ACYPI005542
ACYPI009588-RA RefSeq transcript XM_001945745 PREDICTED: Acyrthosiphon pisum similar to ring canal kelch protein (LOC100168925), mRNA	2.0485	1.97937e-06	ACYPI009588
ACYPI25318-RA Glean transcript GLEAN_05318	2.04758	1.52543e-07	ACYPI25318	uncharacterized protein
ACYPI004128-RA RefSeq transcript XM_001946396 PREDICTED: Acyrthosiphon pisum similar to innexin-1 (LOC100163012), mRNA	2.04577	0.0019567	ACYPI004128	Innexin inx1
ACYPI003079-RA RefSeq transcript XM_001945213 PREDICTED: Acyrthosiphon pisum similar to deoxyribonuclease ii (LOC100161890), mRNA	2.04385	2.45388e-09	ACYPI003079
ACYPI003598-RA RefSeq transcript XM_001943077 PREDICTED: Acyrthosiphon pisum similar to AGAP007119-PA (LOC100162446), mRNA	2.04127	3.58654e-09	ACYPI003598	Sideroflexin-2
ACYPI30256-RA Glean transcript GLEAN_10256	2.03808	3.21607e-08
ACYPI36428-RA Glean transcript GLEAN_16428	2.0345	8.1596e-10
ACYPI007182-RA RefSeq transcript XM_001944493 PREDICTED: Acyrthosiphon pisum similar to uty-prov protein (LOC100166299), mRNA	2.03408	6.72886e-14	ACYPI007182	ubiquitously transcribed sex x/y chromosome tetratricopeptide repeat protein
ACYPI001315-RA RefSeq transcript XM_001942602 PREDICTED: Acyrthosiphon pisum hypothetical protein LOC100159980 (LOC100159980), partial mRNA	2.03117	2.2876e-11	ACYPI001315
ACYPI006646-RA RefSeq transcript XM_001949514 PREDICTED: Acyrthosiphon pisum similar to AGAP002331-PA (LOC100165717), mRNA	2.02993	1.30975e-17	ACYPI006646
ACYPI29380-RA Glean transcript GLEAN_09380	2.02789	5.96429e-09
ACYPI55258-RA Glean transcript GLEAN_35258	2.02754	8.59114e-10	ACYPI55258
ACYPI33329-RA Glean transcript GLEAN_13329	2.02581	1.75837e-12
ACYPI003424-RA RefSeq transcript XM_001945876 PREDICTED: Acyrthosiphon pisum hypothetical protein LOC100162262 (LOC100162262), mRNA	2.02577	8.93464e-05	ACYPI003424	uncharacterized protein
ACYPI38736-RA Glean transcript GLEAN_18736	2.02536	2.51016e-10	ACYPI38736	uncharacterized protein
ACYPI55589-RA Glean transcript GLEAN_35589	2.0239	4.30382e-06	ACYPI55589	uncharacterized protein
ACYPI28018-RA Glean transcript GLEAN_08018	2.02378	1.80081e-06	ACYPI084006
ACYPI29549-RA Glean transcript GLEAN_09549	2.0232	2.09507e-10	ACYPI29549	GA29176
ACYPI008553-RA RefSeq transcript XM_001951025 PREDICTED: Acyrthosiphon pisum similar to fragile X mental retardation syndrome-related protein 1, putative (LOC100167792), mRNA	2.02315	7.66418e-14	ACYPI008553
ACYPI40862-RA Glean transcript GLEAN_20862	2.02229	4.18157e-09	ACYPI40862
ACYPI27909-RA Glean transcript GLEAN_07909	2.02087	8.44198e-10	ACYPI27909
ACYPI39346-RA Glean transcript GLEAN_19346	2.01896	4.83398e-09	ACYPI39346	epsilon-trimethyllysine dioxygenase
ACYPI40646-RA Glean transcript GLEAN_20646	2.01838	4.35492e-11
ACYPI006499-RA RefSeq transcript XM_001948309 PREDICTED: Acyrthosiphon pisum similar to Kinesin family member 4A (LOC100165559), mRNA	2.01756	8.72999e-07	ACYPI006499
ACYPI41823-RA Glean transcript GLEAN_21823	2.01699	2.30615e-12
ACYPI005161-RB RefSeq transcript XM_001952002 PREDICTED: Acyrthosiphon pisum similar to enoyl Coenzyme A hydratase domain containing 1, transcript variant 2 (LOC100164121), mRNA	2.0153	8.61743e-09
ACYPI26711-RA Glean transcript GLEAN_06711	2.01393	3.02229e-10
ACYPI34242-RA Glean transcript GLEAN_14242	2.01391	6.87027e-11
ACYPI000319-RA RefSeq transcript XM_001943980 PREDICTED: Acyrthosiphon pisum hypothetical protein LOC100158899 (LOC100158899), mRNA	2.01161	6.61339e-06	ACYPI000319
ACYPI009011-RB RefSeq transcript XM_001950244 PREDICTED: Acyrthosiphon pisum similar to MPA13 allergen, transcript variant 2 (LOC100168295), mRNA	2.01124	1.62436e-06
ACYPI41013-RA Glean transcript GLEAN_21013	2.01034	6.45869e-09
ACYPI001152-RA RefSeq transcript XM_001950835 PREDICTED: Acyrthosiphon pisum hypothetical protein LOC100159805 (LOC100159805), mRNA	2.01009	1.02851e-10	ACYPI001152
ACYPI25573-RA Glean transcript GLEAN_05573	2.00902	1.17868e-06	ACYPI25573
ACYPI52676-RA Glean transcript GLEAN_32676	2.00456	5.48248e-11	ACYPI002617
ACYPI48561-RA Glean transcript GLEAN_28561	2.002	6.3071e-07	ACYPI48561
ACYPI007515-RA RefSeq transcript XM_001949769 PREDICTED: Acyrthosiphon pisum similar to vitellogenin (LOC100166661), partial mRNA	2.00092	4.8421e-10	ACYPI007515	vitellogenin
