# Supplementary material for: Bacteriocyte Reprogramming to Cope With Nutritional Stress in a Phloem Sap Feeding Hemipteran, the Pea Aphid Acyrthosiphon pisum
Source: Front Physiol. 2018 Oct 25;9:1498. doi: 10.3389/fphys.2018.01498 (PMC6209921; doi:10.3389/fphys.2018.01498)
Supplement: Supplementary file 5 [file Table_5.XLSX]

## Sheet: Gut
Table S5. List of differentially expressed genes between aphids reared on a depleted Tyr/Phe artificial diet (YFØ) and aphids reared on a complete artificial diet (AP3).
log2(Fold-Change) < 0: YFØ < AP3
log2(Fold-Change) > 0: YFØ > AP3
D0 YFØ vs AP3
ACYPI V1	log2FC	Adjusted P-value	ACYPI V2.1c	Product
ACYPI003623-RA RefSeq transcript XM_001947991 PREDICTED: Acyrthosiphon pisum similar to ribosomal protein S21e (LOC100162473), mRNA	-1.05712	0.0236446	ACYPI005755
ACYPI002642-RA RefSeq transcript XM_001952172 PREDICTED: Acyrthosiphon pisum similar to CG13310 CG13310-PA (LOC100161421), mRNA	2.60803	0.000556228	ACYPI002642
ACYPI55697-RA Glean transcript GLEAN_35697	2.40123	0.0266572	ACYPI55697
ACYPI005652-RA RefSeq transcript XM_001948913 PREDICTED: Acyrthosiphon pisum similar to chorion peroxidase (LOC100164660), mRNA	2.08491	0.00121736	ACYPI005652
D1 YFØ vs AP3
ACYPI V1	log2FC	Adjusted P-value	ACYPI V2.1c	Product
ACYPI42066-RA Glean transcript GLEAN_22066	-1.93924	0.000478347	ACYPI071959	uncharacterized protein
ACYPI40956-RA Glean transcript GLEAN_20956	-1.3435	0.0489137	ACYPI40956
D2 YFØ vs AP3
ACYPI V1	log2FC	Adjusted P-value	ACYPI V2.1c	Product
ACYPI000653-RA RefSeq transcript XM_001950868 PREDICTED: Acyrthosiphon pisum similar to CG9706 CG9706-PA (LOC100159262), mRNA	-3.29264	0.0152648	ACYPI000653	acetyl-coenzyme a transporter
ACYPI005168-RA RefSeq transcript XM_001944675 PREDICTED: Acyrthosiphon pisum similar to Bifunctional endo-1,4-beta-xylanase xylA precursor, putative, transcript variant 1 (LOC100164129), mRNA	-3.18811	0.0162527
ACYPI23116-RA Glean transcript GLEAN_03116	-3.02411	0.00321979
ACYPI48440-RA Glean transcript GLEAN_28440	-3.01731	0.00545767
ACYPI49280-RA Glean transcript GLEAN_29280	-2.99457	0.00545767	ACYPI49280	uncharacterized protein
ACYPI23912-RA Glean transcript GLEAN_03912	-2.9858	0.00837691	ACYPI23912
ACYPI006452-RA RefSeq transcript XM_001944030 PREDICTED: Acyrthosiphon pisum hypothetical protein LOC100165505 (LOC100165505), mRNA	-2.97249	0.00472689	ACYPI006452	uncharacterized protein
ACYPI010105-RA RefSeq transcript XM_001944947 PREDICTED: Acyrthosiphon pisum similar to acetyl-coenzyme A transporter (LOC100169490), mRNA	-2.92597	0.00656091	ACYPI010105	acetyl-coenzyme a transporter
ACYPI008216-RA RefSeq transcript XM_001944993 PREDICTED: Acyrthosiphon pisum similar to SD08430p (LOC100167419), mRNA	-2.90934	0.00752873	ACYPI008216
ACYPI45931-RA Glean transcript GLEAN_25931	-2.83074	0.00632789
ACYPI39443-RA Glean transcript GLEAN_19443	-2.79723	0.00643395	ACYPI39443	uncharacterized protein
ACYPI005979-RA RefSeq transcript XM_001950895 PREDICTED: Acyrthosiphon pisum hypothetical protein LOC100165005 (LOC100165005), mRNA	-2.69251	0.0162527	ACYPI005979	uncharacterized protein
ACYPI004864-RA RefSeq transcript XM_001950894 PREDICTED: Acyrthosiphon pisum similar to CG14691 CG14691-PA (LOC100163807), mRNA	-2.65631	0.00837691	ACYPI004864	synaptic vesicle protein
ACYPI010069-RA RefSeq transcript XM_001952464 PREDICTED: Acyrthosiphon pisum similar to CG1124 CG1124-PA (LOC100169453), mRNA	-2.57018	0.0051469	ACYPI010069
ACYPI007237-RA RefSeq transcript XM_001944133 PREDICTED: Acyrthosiphon pisum similar to organic cation transporter (LOC100166357), mRNA	-2.54571	0.00060366	ACYPI007237	Organic cation transporter
ACYPI001911-RA RefSeq transcript XM_001943984 PREDICTED: Acyrthosiphon pisum similar to MEGF6 (LOC100160627), mRNA	-2.48691	0.0152648	ACYPI001911
ACYPI009358-RA RefSeq transcript XM_001946812 PREDICTED: Acyrthosiphon pisum similar to Neprilysin 1 CG5905-PA (LOC100168678), mRNA	-2.48061	0.00482026	ACYPI009358
ACYPI36102-RA Glean transcript GLEAN_16102	-2.47979	0.0295595
ACYPI008878-RA RefSeq transcript XM_001949704 PREDICTED: Acyrthosiphon pisum similar to AGAP007732-PA (LOC100168152), mRNA	-2.47165	0.0322908	ACYPI008878
ACYPI002921-RA RefSeq transcript XM_001951135 PREDICTED: Acyrthosiphon pisum hypothetical protein LOC100161721 (LOC100161721), mRNA	-2.42742	0.00545767	ACYPI002921
ACYPI008496-RA RefSeq transcript XM_001950759 PREDICTED: Acyrthosiphon pisum hypothetical protein LOC100167729 (LOC100167729), mRNA	-2.40915	0.0422586	ACYPI008496
ACYPI000593-RA RefSeq transcript XM_001951120 PREDICTED: Acyrthosiphon pisum similar to cystathionine beta-lyase (LOC100159197), partial mRNA	-2.40829	0.0160529	ACYPI000593
ACYPI48598-RA Glean transcript GLEAN_28598	-2.40705	0.0162527	ACYPI48598
ACYPI004438-RA RefSeq transcript XM_001950810 PREDICTED: Acyrthosiphon pisum similar to conserved hypothetical protein (LOC100163344), mRNA	-2.40654	0.000747735	ACYPI004438	acetyl-coenzyme a transporter
ACYPI006531-RA RefSeq transcript XM_001945539 PREDICTED: Acyrthosiphon pisum hypothetical protein LOC100165596 (LOC100165596), mRNA	-2.33694	0.00342718	ACYPI006531	N-acetylmuramoyl-L-alanine amidase AmiD
ACYPI004737-RA RefSeq transcript XM_001946357 PREDICTED: Acyrthosiphon pisum hypothetical protein LOC100163669 (LOC100163669), mRNA	-2.27958	0.00665948	ACYPI004737	uncharacterized protein
ACYPI21937-RA Glean transcript GLEAN_01937	-2.23217	0.00700818	ACYPI085258	uncharacterized protein
ACYPI33264-RA Glean transcript GLEAN_13264	-2.22687	0.0130384
ACYPI20003-RA Glean transcript GLEAN_00003	-2.2123	0.00749823	ACYPI088246
ACYPI001203-RA RefSeq transcript XM_001949976 PREDICTED: Acyrthosiphon pisum similar to AGAP000885-PA (LOC100159862), mRNA	-2.20495	0.0428802	ACYPI001203
ACYPI32962-RA Glean transcript GLEAN_12962	-2.17547	0.0121973	ACYPI088238
ACYPI000392-RA RefSeq transcript XM_001943596 PREDICTED: Acyrthosiphon pisum similar to trypsin-like protein (LOC100158977), mRNA	-2.04372	0.0349215	ACYPI000392	Serine proteinase
ACYPI38107-RA Glean transcript GLEAN_18107	-2.00446	0.0130384	ACYPI073063	uncharacterized protein
ACYPI20002-RA Glean transcript GLEAN_00002	-1.98985	0.010075	ACYPI073063	uncharacterized protein
ACYPI37822-RA Glean transcript GLEAN_17822	-1.97289	0.0312774
ACYPI001839-RA RefSeq transcript XM_001951130 PREDICTED: Acyrthosiphon pisum similar to CG32580 CG32580-PA (LOC100160550), mRNA	-1.95259	0.00098705	ACYPI001839
ACYPI009575-RA RefSeq transcript XM_001943660 PREDICTED: Acyrthosiphon pisum similar to Bifunctional endo-1,4-beta-xylanase xylA precursor, putative (LOC100168912), partial mRNA	-1.92499	0.0172976
ACYPI45387-RA Glean transcript GLEAN_25387	-1.88726	0.00545767
ACYPI000297-RA RefSeq transcript XM_001945992 PREDICTED: Acyrthosiphon pisum similar to CLIP-domain serine protease subfamily C (AGAP008835-PA) (LOC100158876), mRNA	-1.84281	0.0150189	ACYPI000297	Serine protease
ACYPI002175-RA RefSeq transcript XM_001949053 PREDICTED: Acyrthosiphon pisum similar to conserved hypothetical protein (LOC100160909), mRNA	-1.84116	0.00700818	ACYPI002175	uncharacterized protein
ACYPI000239-RA RefSeq transcript XM_001947604 PREDICTED: Acyrthosiphon pisum similar to CG6293 CG6293-PA (LOC100158812), mRNA	-1.82175	0.0423699	ACYPI000239
ACYPI004227-RA RefSeq transcript XM_001948500 PREDICTED: Acyrthosiphon pisum hypothetical protein LOC100163120 (LOC100163120), mRNA	-1.81098	0.00545767	ACYPI004227
ACYPI52819-RA Glean transcript GLEAN_32819	-1.79388	0.0172976	ACYPI52819
ACYPI004895-RA RefSeq transcript XM_001950424 PREDICTED: Acyrthosiphon pisum hypothetical protein LOC100163838 (LOC100163838), mRNA	-1.70162	0.0322908	ACYPI009286	cabeza
ACYPI004849-RA RefSeq transcript XM_001947052 PREDICTED: Acyrthosiphon pisum similar to FGGY carbohydrate kinase domain containing (LOC100163790), partial mRNA	-1.68904	0.0207097	ACYPI004849
ACYPI003368-RC RefSeq transcript XM_001948380 PREDICTED: Acyrthosiphon pisum similar to serine/threonine kinase, transcript variant 3 (LOC100162203), mRNA	-1.66005	0.0309464	ACYPI003368
ACYPI20528-RA Glean transcript GLEAN_00528	-1.65309	0.0399554	ACYPI34730
ACYPI003368-RA RefSeq transcript XM_001948278 PREDICTED: Acyrthosiphon pisum similar to serine/threonine kinase, transcript variant 1 (LOC100162203), mRNA	-1.6432	0.0177469	ACYPI003368
ACYPI001008-RA RefSeq transcript XM_001943281 PREDICTED: Acyrthosiphon pisum similar to carboxypeptidase, vitellogenic-like (LOC100159655), mRNA	-1.55283	0.0207097	ACYPI001008	serine carboxypeptidase
ACYPI003008-RA RefSeq transcript XM_001949885 PREDICTED: Acyrthosiphon pisum similar to AGAP007667-PA (LOC100161811), mRNA	-1.54637	0.0150189	ACYPI003008	Sugar transporter 12
ACYPI001524-RA RefSeq transcript XM_001945763 PREDICTED: Acyrthosiphon pisum similar to viral A-type inclusion protein, putative (LOC100160209), mRNA	-1.43538	0.0248358	ACYPI001524
ACYPI34373-RA Glean transcript GLEAN_14373	-1.37829	0.00765343	ACYPI54522	uncharacterized protein
ACYPI41802-RA Glean transcript GLEAN_21802	-1.32575	0.0172534
ACYPI53153-RA Glean transcript GLEAN_33153	-1.17812	0.0457257	ACYPI53153	DNA polymerase
ACYPI004422-RA RefSeq transcript XM_001943338 PREDICTED: Acyrthosiphon pisum similar to adenylate cyclase (LOC100163328), mRNA	-1.01903	0.0160206	ACYPI004422
ACYPI000732-RA RefSeq transcript XM_001947401 PREDICTED: Acyrthosiphon pisum similar to CG14935 CG14935-PB (LOC100159352), mRNA	2.73998	0.0150189
ACYPI38431-RA Glean transcript GLEAN_18431	1.77262	0.00286465	ACYPI38431	alpha-amylase
ACYPI001701-RA RefSeq transcript XM_001949467 PREDICTED: Acyrthosiphon pisum similar to cytochrome P450 CYP15A1 (LOC100160402), partial mRNA	1.71542	0.00553592	ACYPI001701	Cytochrome P450 15A1
ACYPI49296-RA Glean transcript GLEAN_29296	1.69249	0.00212151	ACYPI49296	uncharacterized protein
ACYPI39077-RA Glean transcript GLEAN_19077	1.58023	0.0369691	ACYPI085286	Heat shock 70 kDa protein cognate 4
ACYPI38436-RA Glean transcript GLEAN_18436	1.29311	0.0130384
ACYPI30676-RA Glean transcript GLEAN_10676	1.18155	0.0085825	ACYPI30676	uncharacterized protein
ACYPI46394-RA Glean transcript GLEAN_26394	0.954985	0.0370771	ACYPI46394	uncharacterized protein
D3 YFØ vs AP3
ACYPI V1	log2FC	Adjusted P-value	ACYPI V2.1c	Product
ACYPI003003-RA RefSeq transcript XM_001944610 PREDICTED: Acyrthosiphon pisum similar to cuticular protein 64, RR-2 family (AGAP006865-PA) (LOC100161806), mRNA	-4.2325	0.00705123	ACYPI003003
D4 YFØ vs AP3
ACYPI V1	log2FC	Adjusted P-value	ACYPI V2.1c	Product
ACYPI003664-RA RefSeq transcript XM_001949020 PREDICTED: Acyrthosiphon pisum hypothetical protein LOC100162515 (LOC100162515), mRNA	-1.92584	0.0186613	ACYPI003664	uncharacterized protein
ACYPI004227-RA RefSeq transcript XM_001948500 PREDICTED: Acyrthosiphon pisum hypothetical protein LOC100163120 (LOC100163120), mRNA	-1.87687	0.0137165	ACYPI004227
ACYPI49697-RA Glean transcript GLEAN_29697	-1.61698	0.0186613
ACYPI44642-RA Glean transcript GLEAN_24642	-1.54312	0.0186613	ACYPI44642
ACYPI38471-RA Glean transcript GLEAN_18471	-1.52778	0.00219549
ACYPI42568-RA Glean transcript GLEAN_22568	-0.950917	0.000812295	ACYPI42568
ACYPI21123-RA Glean transcript GLEAN_01123	1.06797	0.0186613	ACYPI21123
D5 YFØ vs AP3
ACYPI V1	log2FC	Adjusted P-value	ACYPI V2.1c	Product
ACYPI22889-RA Glean transcript GLEAN_02889	-2.19765	0.00764755	ACYPI22889
ACYPI002784-RA RefSeq transcript XM_001952584 PREDICTED: Acyrthosiphon pisum similar to AGAP003680-PA (LOC100161572), mRNA	-1.89544	0.0358979	ACYPI007050	abc transporter
ACYPI007050-RA RefSeq transcript XM_001942896 PREDICTED: Acyrthosiphon pisum similar to CG9990 CG9990-PA (LOC100166151), mRNA	-1.87727	0.00831441	ACYPI007050	abc transporter
ACYPI38431-RA Glean transcript GLEAN_18431	1.80204	0.00764755	ACYPI38431	alpha-amylase
ACYPI38436-RA Glean transcript GLEAN_18436	1.55156	0.00764755
ACYPI50614-RA Glean transcript GLEAN_30614	1.42132	0.00764755	ACYPI071330	uncharacterized protein
ACYPI25278-RA Glean transcript GLEAN_05278	0.846282	0.0314185	ACYPI25278	uncharacterized protein
D7 YFØ vs AP3
ACYPI V1	log2FC	Adjusted P-value	ACYPI V2.1c	Product
ACYPI000421-RA RefSeq transcript XM_001952705 PREDICTED: Acyrthosiphon pisum similar to unc-13 CG2999-PB (LOC100159009), mRNA	-1.60959	0.0283555	ACYPI000421	phorbol ester/diacylglycerol-binding protein unc-13
ACYPI39369-RA Glean transcript GLEAN_19369	2.34205	0.00517176	ACYPI39369	hypothetical protein
ACYPI49317-RA Glean transcript GLEAN_29317	2.02512	0.00174465
ACYPI007548-RA RefSeq transcript XM_001949324 PREDICTED: Acyrthosiphon pisum similar to CG8800 CG8800-PA (LOC100166696), mRNA	1.73347	0.0330877	ACYPI007548
ACYPI002949-RA RefSeq transcript XM_001948853 PREDICTED: Acyrthosiphon pisum similar to Niemann-Pick Type C-2, putative (LOC100161750), mRNA	1.56243	0.0480479	ACYPI002949
ACYPI52562-RA Glean transcript GLEAN_32562	1.53621	0.038994	ACYPI52562	uncharacterized protein
ACYPI21267-RA Glean transcript GLEAN_01267	1.42635	0.0165584	ACYPI21267
ACYPI50614-RA Glean transcript GLEAN_30614	1.23379	0.038994	ACYPI071330	uncharacterized protein
ACYPI54107-RA Glean transcript GLEAN_34107	0.978096	0.0114664	ACYPI54107

## Sheet: Bacteriocytes
Table S5. List of differentially expressed genes between aphids reared on a depleted Tyr/Phe artificial diet (YFØ) and aphids reared on a complete artificial diet (AP3).
log2(Fold-Change) < 0: YFØ < AP3
log2(Fold-Change) > 0: YFØ > AP3
D3 YFØ vs AP3
ACYPI V1	log2FC	Adjusted P-value	ACYPI V2.1c	Product
ACYPI010012-RA RefSeq transcript XM_001951870 PREDICTED: Acyrthosiphon pisum similar to cytochrome P450 (LOC100169387), mRNA	-3.92649	0.0134721
ACYPI004952-RA RefSeq transcript XM_001945798 PREDICTED: Acyrthosiphon pisum similar to cytochrome P450 (LOC100163900), mRNA	-3.29872	0.000874165	ACYPI004952
ACYPI31408-RA Glean transcript GLEAN_11408	-3.15144	0.032007	ACYPI31408	AGAP007028-PA
ACYPI000002-RA RefSeq transcript NM_001126135 gi|187097093|ref|NM_001126135.1 Acyrthosiphon pisum sucrase (S1), mRNA	-3.14027	0.0399209	ACYPI000002
ACYPI006605-RA RefSeq transcript XM_001950609 PREDICTED: Acyrthosiphon pisum hypothetical protein LOC100165673 (LOC100165673), mRNA	-3.12358	0.00277225	ACYPI006605	uncharacterized protein
ACYPI000761-RA RefSeq transcript XM_001951431 PREDICTED: Acyrthosiphon pisum similar to cytochrome P450 CYP6Y1 (LOC100159387), mRNA	-3.03992	0.0347638	ACYPI000761
ACYPI009772-RA RefSeq transcript XM_001943500 PREDICTED: Acyrthosiphon pisum similar to AGAP007300-PA (LOC100169125), mRNA	-2.80448	0.0125322	ACYPI009772	Alkaline phosphatase
ACYPI000008-RA RefSeq transcript NM_001126140 gi|187099103|ref|NM_001126140.1 Acyrthosiphon pisum cathepsin B-912 (Catb-912), mRNA	-2.77714	0.00588395	ACYPI000008
ACYPI008413-RA RefSeq transcript XM_001945670 PREDICTED: Acyrthosiphon pisum similar to Juvenile hormone-inducible protein, putative (LOC100167634), mRNA	-2.76643	0.0107737	ACYPI008413	juvenile hormone-inducible protein
ACYPI004993-RA RefSeq transcript XM_001948289 PREDICTED: Acyrthosiphon pisum similar to conserved hypothetical protein (LOC100163944), partial mRNA	-2.75512	0.0241745	ACYPI004993	CD9 antigen
ACYPI004249-RA RefSeq transcript XM_001952276 PREDICTED: Acyrthosiphon pisum similar to AGAP000550-PA (LOC100163145), mRNA	-2.70684	0.0105057	ACYPI004249
ACYPI006451-RA RefSeq transcript XM_001947508 PREDICTED: Acyrthosiphon pisum similar to delta-9 desaturase 1 (LOC100165504), mRNA	-2.68334	0.0121631	ACYPI006451
ACYPI004920-RA RefSeq transcript XM_001948539 PREDICTED: Acyrthosiphon pisum similar to bombesin receptor subtype-3 (LOC100163866), mRNA	-2.63618	3.90317e-05	ACYPI004920
ACYPI23348-RA Glean transcript GLEAN_03348	-2.59928	0.0160977	ACYPI23348	uncharacterized protein
ACYPI003561-RA RefSeq transcript XM_001949689 PREDICTED: Acyrthosiphon pisum hypothetical protein LOC100162409, transcript variant 1 (LOC100162409), mRNA	-2.57578	0.0201134	ACYPI003561
ACYPI003338-RA RefSeq transcript XM_001943906 PREDICTED: Acyrthosiphon pisum similar to Legumain precursor (Asparaginyl endopeptidase) (Protease, cysteine 1) (LOC100162169), mRNA	-2.56181	0.0120516	ACYPI003338	uncharacterized protein
ACYPI002309-RA RefSeq transcript XM_001951687 PREDICTED: Acyrthosiphon pisum hypothetical protein LOC100161055 (LOC100161055), mRNA	-2.54652	0.00717959	ACYPI002309	uncharacterized protein
ACYPI005252-RA RefSeq transcript XM_001946676 PREDICTED: Acyrthosiphon pisum similar to sodium-dependent phosphate transporter (LOC100164217), mRNA	-2.52969	0.0495185	ACYPI005252	Na(+)-dependent inorganic phosphate cotransporter
ACYPI000001-RA RefSeq transcript NM_001126134 gi|187179336|ref|NM_001126134.1 Acyrthosiphon pisum membrane alanyl aminopeptidase N (LOC100144773), mRNA	-2.50622	0.0338769	ACYPI000001	Aminopeptidase N-like protein
ACYPI006655-RA RefSeq transcript XM_001948315 PREDICTED: Acyrthosiphon pisum similar to membrane alanyl aminopeptidase N (LOC100165726), mRNA	-2.48715	0.0125423	ACYPI006655	Aminopeptidase N-like protein
ACYPI005577-RA RefSeq transcript XM_001947948 PREDICTED: Acyrthosiphon pisum similar to conserved hypothetical protein, transcript variant 1 (LOC100164577), mRNA	-2.47824	0.048137	ACYPI005577
ACYPI003561-RB RefSeq transcript XM_001949714 PREDICTED: Acyrthosiphon pisum hypothetical protein LOC100162409, transcript variant 2 (LOC100162409), mRNA	-2.47207	0.0238276	ACYPI003561
ACYPI26020-RA Glean transcript GLEAN_06020	-2.47151	0.00341897	ACYPI26020
ACYPI001427-RA RefSeq transcript XM_001945262 PREDICTED: Acyrthosiphon pisum similar to juvenile hormone-inducible protein 26 (LOC100160101), mRNA	-2.44739	0.0263922	ACYPI001427	juvenile hormone-inducible protein
ACYPI46360-RA Glean transcript GLEAN_26360	-2.40661	0.000585623
ACYPI010150-RA RefSeq transcript XM_001944251 PREDICTED: Acyrthosiphon pisum similar to CG31445 CG31445-PA (LOC100169540), partial mRNA	-2.40642	0.026757	ACYPI010150	Aminopeptidase N
ACYPI000639-RA RefSeq transcript XM_001948658 PREDICTED: Acyrthosiphon pisum similar to cytochrome P450 CYP6AX1 protein (LOC100159248), mRNA	-2.38517	0.0343248
ACYPI005427-RA RefSeq transcript XM_001948978 PREDICTED: Acyrthosiphon pisum hypothetical protein LOC100164407 (LOC100164407), partial mRNA	-2.36539	0.0114283	ACYPI005427	uncharacterized protein
ACYPI45775-RA Glean transcript GLEAN_25775	-2.34249	0.0134721
ACYPI000018-RA RefSeq transcript XM_001943067 PREDICTED: Acyrthosiphon pisum cathepsin B-16D2 (Catb-16d2), mRNA	-2.30582	0.0269014	ACYPI000018	Cathepsin B-S
ACYPI004774-RA RefSeq transcript XM_001945458 PREDICTED: Acyrthosiphon pisum similar to CG6619 CG6619-PA (LOC100163711), partial mRNA	-2.26434	6.3843e-05	ACYPI004774	uncharacterized protein
ACYPI34531-RA Glean transcript GLEAN_14531	-2.24765	0.00410756
ACYPI30140-RA Glean transcript GLEAN_10140	-2.20705	0.00569396	ACYPI30140	uncharacterized protein
ACYPI33102-RA Glean transcript GLEAN_13102	-2.17272	0.0283256
ACYPI001245-RA RefSeq transcript XM_001950671 PREDICTED: Acyrthosiphon pisum similar to AGAP012703-PA (LOC100159905), mRNA	-2.12959	0.0156752	ACYPI001245
ACYPI007654-RA RefSeq transcript XM_001948561 PREDICTED: Acyrthosiphon pisum similar to AGAP008359-PA (LOC100166814), partial mRNA	-2.06785	0.00468404	ACYPI008303	Sodium-coupled monocarboxylate transporter 1
ACYPI006269-RA RefSeq transcript XM_001946731 PREDICTED: Acyrthosiphon pisum hypothetical protein LOC100165312 (LOC100165312), mRNA	-2.03936	0.0330514	ACYPI006269	uncharacterized protein
ACYPI25204-RA Glean transcript GLEAN_05204	-2.0344	0.0114283	ACYPI087834
ACYPI36599-RA Glean transcript GLEAN_16599	-2.02835	0.0149191
ACYPI000537-RA RefSeq transcript XM_001943180 PREDICTED: Acyrthosiphon pisum similar to slimfast CG11128-PC (LOC100159139), mRNA	-2.00454	0.0459803
ACYPI004364-RA RefSeq transcript XM_001947424 PREDICTED: Acyrthosiphon pisum similar to conserved hypothetical protein (LOC100163267), mRNA	-1.96914	0.00569396	ACYPI004364
ACYPI31621-RA Glean transcript GLEAN_11621	-1.96819	0.041486
ACYPI008767-RA RefSeq transcript XM_001946491 PREDICTED: Acyrthosiphon pisum hypothetical protein LOC100168031 (LOC100168031), mRNA	-1.96182	0.0434658	ACYPI008767
ACYPI24120-RA Glean transcript GLEAN_04120	-1.94101	0.0387777	ACYPI24120
ACYPI42102-RA Glean transcript GLEAN_22102	-1.92066	0.0254365
ACYPI32002-RA Glean transcript GLEAN_12002	-1.90764	0.0107737
ACYPI42762-RA Glean transcript GLEAN_22762	-1.88541	0.0123326	ACYPI42762
ACYPI33329-RA Glean transcript GLEAN_13329	-1.8579	3.90317e-05
ACYPI54458-RA Glean transcript GLEAN_34458	-1.83765	0.000585623	ACYPI54458
ACYPI51847-RA Glean transcript GLEAN_31847	-1.83701	0.0119218	ACYPI51847	uncharacterized protein
ACYPI006882-RA RefSeq transcript XM_001946393 PREDICTED: Acyrthosiphon pisum similar to cytochrome P450 CYP6AX1 protein (LOC100165972), mRNA	-1.82805	0.0222353	ACYPI006882	Cytochrome P450
ACYPI46292-RA Glean transcript GLEAN_26292	-1.82595	0.0114283	ACYPI46292
ACYPI36652-RA Glean transcript GLEAN_16652	-1.81523	0.00307821	ACYPI36652
ACYPI007528-RA RefSeq transcript XM_001948896 PREDICTED: Acyrthosiphon pisum similar to glucosyl/glucuronosyl transferases (LOC100166674), mRNA	-1.80099	0.0119218	ACYPI007528	glucosyl/glucuronosyl transferases
ACYPI008900-RA RefSeq transcript XM_001950645 PREDICTED: Acyrthosiphon pisum similar to AGAP004457-PA (LOC100168174), mRNA	-1.80051	0.0119218	ACYPI008900	sugar transporter
ACYPI49127-RA Glean transcript GLEAN_29127	-1.79372	0.008211	ACYPI49127
ACYPI48423-RA Glean transcript GLEAN_28423	-1.77957	0.00515206	ACYPI48423	Limulus clotting factor C
ACYPI007756-RA RefSeq transcript XM_001948948 PREDICTED: Acyrthosiphon pisum similar to lipase (LOC100166920), mRNA	-1.76979	0.000585623	ACYPI007756	Pancreatic lipase-related protein 2
ACYPI54019-RA Glean transcript GLEAN_34019	-1.76681	0.0343248	ACYPI54019	Transposable element Tc3 transposase
ACYPI41460-RA Glean transcript GLEAN_21460	-1.75921	0.0138162	ACYPI41460	uncharacterized protein
ACYPI35881-RA Glean transcript GLEAN_15881	-1.74961	0.0283256	ACYPI35881	Cuticle protein
ACYPI003450-RA RefSeq transcript XM_001947220 PREDICTED: Acyrthosiphon pisum hypothetical protein LOC100162290 (LOC100162290), mRNA	-1.74832	0.0219158	ACYPI003450	uncharacterized protein
ACYPI010159-RA RefSeq transcript XM_001951788 PREDICTED: Acyrthosiphon pisum similar to CG17323 CG17323-PA (LOC100169551), mRNA	-1.71354	0.0263315	ACYPI010159	glucosyl/glucuronosyl transferases
ACYPI48621-RA Glean transcript GLEAN_28621	-1.70981	0.033851	ACYPI48621	uncharacterized protein
ACYPI34957-RA Glean transcript GLEAN_14957	-1.70353	0.0119218	ACYPI34957
ACYPI54403-RA Glean transcript GLEAN_34403	-1.67765	0.0261622
ACYPI004651-RA RefSeq transcript XM_001946427 PREDICTED: Acyrthosiphon pisum similar to AGAP003577-PA (LOC100163574), partial mRNA	-1.67505	0.0196282	ACYPI004651
ACYPI29278-RA Glean transcript GLEAN_09278	-1.66788	0.0230136	ACYPI29278
ACYPI32924-RA Glean transcript GLEAN_12924	-1.657	0.00717959
ACYPI46379-RA Glean transcript GLEAN_26379	-1.65332	0.0258576
ACYPI28183-RA Glean transcript GLEAN_08183	-1.64016	0.0459803
ACYPI002542-RA RefSeq transcript XM_001943701 PREDICTED: Acyrthosiphon pisum similar to RE46682p (LOC100161310), mRNA	-1.63448	0.0249702	ACYPI002542	RE46682p
ACYPI37969-RA Glean transcript GLEAN_17969	-1.62972	0.0119218	ACYPI37969
ACYPI006347-RA RefSeq transcript XM_001945178 PREDICTED: Acyrthosiphon pisum similar to AGAP002638-PA (LOC100165394), mRNA	-1.62145	0.00410756	ACYPI006347
ACYPI004481-RA RefSeq transcript XM_001950406 PREDICTED: Acyrthosiphon pisum similar to CG11961 CG11961-PA (LOC100163390), mRNA	-1.61321	0.0145224	ACYPI004481	uncharacterized protein
ACYPI001438-RA RefSeq transcript XM_001948839 PREDICTED: Acyrthosiphon pisum similar to CG4660 CG4660-PA (LOC100160113), mRNA	-1.60627	0.0447477	ACYPI001438	uncharacterized protein
ACYPI34834-RA Glean transcript GLEAN_14834	-1.60588	0.0234979	ACYPI34834	Zinc finger protein KIAA0543
ACYPI004665-RA RefSeq transcript XM_001946230 PREDICTED: Acyrthosiphon pisum similar to AGAP009528-PA (LOC100163588), mRNA	-1.58768	0.000585623	ACYPI004665
ACYPI008507-RA RefSeq transcript XM_001942844 PREDICTED: Acyrthosiphon pisum similar to potassium channel subunit (LOC100167740), mRNA	-1.55509	0.0196282	ACYPI008507	sodium-and chloride-activated atp-sensitive potassium channel
ACYPI000794-RA RefSeq transcript XM_001952064 PREDICTED: Acyrthosiphon pisum similar to glutathione S-transferase-like protein (LOC100159421), mRNA	-1.54776	0.0258576	ACYPI000794
ACYPI010081-RA RefSeq transcript XM_001950527 PREDICTED: Acyrthosiphon pisum similar to cathepsin B-N (LOC100169466), mRNA	-1.54408	0.049119	ACYPI010081	Cathepsin B-S
ACYPI28962-RA Glean transcript GLEAN_08962	-1.54349	0.000585623	ACYPI28962	uncharacterized protein
ACYPI27286-RA Glean transcript GLEAN_07286	-1.54134	0.0117523	ACYPI27286
ACYPI45978-RA Glean transcript GLEAN_25978	-1.54069	0.0283256	ACYPI45978
ACYPI30365-RA Glean transcript GLEAN_10365	-1.53563	0.0244317	ACYPI30365
ACYPI002004-RA RefSeq transcript XM_001947845 PREDICTED: Acyrthosiphon pisum similar to LOC733225 protein (LOC100160730), mRNA	-1.52893	0.032007	ACYPI002004
ACYPI008712-RA RefSeq transcript XM_001945599 PREDICTED: Acyrthosiphon pisum similar to AGAP003572-PA (LOC100167969), partial mRNA	-1.51579	0.0161804	ACYPI008712
ACYPI003684-RA RefSeq transcript XM_001949766 PREDICTED: Acyrthosiphon pisum similar to LOC402804 protein (LOC100162536), mRNA	-1.51519	0.0249702	ACYPI003684	bphl protein
ACYPI008688-RA RefSeq transcript XM_001950481 PREDICTED: Acyrthosiphon pisum hypothetical protein LOC100167942 (LOC100167942), mRNA	-1.50707	0.0235215	ACYPI008688	uncharacterized protein
ACYPI45668-RA Glean transcript GLEAN_25668	-1.50381	0.00549764	ACYPI45669	uncharacterized protein
ACYPI009055-RA RefSeq transcript XM_001942639 PREDICTED: Acyrthosiphon pisum similar to troponin C type IIIa (LOC100168346), mRNA	-1.50366	0.00502086	ACYPI009055
ACYPI002831-RA RefSeq transcript XM_001948407 PREDICTED: Acyrthosiphon pisum similar to membrane alanyl aminopeptidase N (LOC100161622), mRNA	-1.50099	0.0125322	ACYPI002831
ACYPI007478-RA RefSeq transcript XM_001951195 PREDICTED: Acyrthosiphon pisum hypothetical protein LOC100166621, transcript variant 1 (LOC100166621), mRNA	-1.50011	0.0271996
ACYPI32061-RA Glean transcript GLEAN_12061	-1.49916	0.0179696	ACYPI32061	uncharacterized protein
ACYPI004239-RA RefSeq transcript XM_001943114 PREDICTED: Acyrthosiphon pisum similar to RhoGAP102A CG1748-PA (LOC100163133), mRNA	-1.49915	0.00410756	ACYPI004239	rho gtpase-activating protein 6 rho-type gtpase-activating protein 6 rho-type gtpase-activating protein rhogapx-1
ACYPI009882-RA RefSeq transcript XM_001952375 PREDICTED: Acyrthosiphon pisum similar to SD27140p (LOC100169244), mRNA	-1.49507	0.0412829	ACYPI009882
ACYPI33359-RA Glean transcript GLEAN_13359	-1.49506	0.0131275
ACYPI006729-RA RefSeq transcript XM_001948264 PREDICTED: Acyrthosiphon pisum similar to cytochrome P450 CYP302A1 (LOC100165806), mRNA	-1.48935	0.0114283
ACYPI005624-RA RefSeq transcript XM_001946295 PREDICTED: Acyrthosiphon pisum hypothetical protein LOC100164630 (LOC100164630), mRNA	-1.48916	0.00652521	ACYPI005624	uncharacterized protein
ACYPI48788-RA Glean transcript GLEAN_28788	-1.48827	0.0499086	ACYPI48788	protein disulfide isomerase
ACYPI34994-RA Glean transcript GLEAN_14994	-1.48553	0.0342223	ACYPI082948
ACYPI31295-RA Glean transcript GLEAN_11295	-1.4854	0.0258576	ACYPI31295
ACYPI34096-RA Glean transcript GLEAN_14096	-1.47986	0.0154686
ACYPI006024-RA RefSeq transcript XM_001943447 PREDICTED: Acyrthosiphon pisum similar to alkaline phosphatase (LOC100165053), mRNA	-1.4697	0.0165195	ACYPI006024
ACYPI008471-RA RefSeq transcript XM_001945467 PREDICTED: Acyrthosiphon pisum similar to deoxyribonuclease I, putative (LOC100167701), mRNA	-1.45928	0.0161804	ACYPI008471
ACYPI008156-RA RefSeq transcript XM_001948771 PREDICTED: Acyrthosiphon pisum similar to Cuticular protein 62Bc CG1919-PA (LOC100167357), mRNA	-1.4533	0.0482934	ACYPI008156	cuticle protein
ACYPI25052-RA Glean transcript GLEAN_05052	-1.45255	0.0255355	ACYPI25052
ACYPI007966-RA RefSeq transcript XM_001944801 PREDICTED: Acyrthosiphon pisum similar to Glycerate kinase (LOC100167150), mRNA	-1.45185	0.013164	ACYPI007966	Glycerate kinase
ACYPI26066-RA Glean transcript GLEAN_06066	-1.43969	0.0149148
ACYPI003754-RA RefSeq transcript XM_001951683 PREDICTED: Acyrthosiphon pisum similar to multidrug resistance-associated protein 14 (LOC100162608), partial mRNA	-1.43909	0.0354819	ACYPI003754	ABC transporter
ACYPI38736-RA Glean transcript GLEAN_18736	-1.43702	0.0307246	ACYPI38736	uncharacterized protein
ACYPI50234-RA Glean transcript GLEAN_30234	-1.4336	0.0314364
ACYPI000963-RA RefSeq transcript XM_001943977 PREDICTED: Acyrthosiphon pisum similar to Retinal homeobox protein Rx (DRx1) (DRx) (LOC100159606), mRNA	-1.433	0.0407568	ACYPI000963	Retinal homeobox
ACYPI22018-RA Glean transcript GLEAN_02018	-1.43243	0.0324317
ACYPI002910-RA RefSeq transcript XM_001943220 PREDICTED: Acyrthosiphon pisum similar to carboxypeptidase, vitellogenic-like (LOC100161709), mRNA	-1.43185	0.0254365	ACYPI002910
ACYPI005879-RA RefSeq transcript XM_001945438 PREDICTED: Acyrthosiphon pisum similar to juvenile hormone-inducible protein 26 (LOC100164898), mRNA	-1.42604	0.0163566	ACYPI005879	RH23112p
ACYPI38416-RA Glean transcript GLEAN_18416	-1.42556	0.0139788	ACYPI38416	CG1105
ACYPI003868-RA RefSeq transcript XM_001943959 PREDICTED: Acyrthosiphon pisum similar to CG7945 CG7945-PB, transcript variant 1 (LOC100162734), mRNA	-1.41433	0.0378222	ACYPI003868	uncharacterized protein
ACYPI49749-RA Glean transcript GLEAN_29749	-1.40738	0.00633917	ACYPI49749	uncharacterized protein
ACYPI010163-RA RefSeq transcript XM_001942798 PREDICTED: Acyrthosiphon pisum similar to sodium/chloride dependent transporter (LOC100169555), mRNA	-1.40123	0.0119218	ACYPI010163	Transporter
ACYPI009818-RA RefSeq transcript XM_001947834 PREDICTED: Acyrthosiphon pisum similar to zormin CG33484-PD (LOC100169177), mRNA	-1.38878	0.0267906	ACYPI009818
ACYPI46259-RA Glean transcript GLEAN_26259	-1.38565	0.0284028	ACYPI46259	GA22538
ACYPI006394-RA RefSeq transcript XM_001946191 PREDICTED: Acyrthosiphon pisum similar to Actin (LOC100165443), mRNA	-1.38476	0.00336203	ACYPI006394
ACYPI30784-RA Glean transcript GLEAN_10784	-1.37755	0.0131275	ACYPI30784
ACYPI005938-RA RefSeq transcript XM_001951304 PREDICTED: Acyrthosiphon pisum hypothetical protein LOC100164962 (LOC100164962), mRNA	-1.37393	0.0343248	ACYPI005805
ACYPI007680-RA RefSeq transcript XM_001949854 PREDICTED: Acyrthosiphon pisum similar to conserved hypothetical protein, transcript variant 1 (LOC100166840), mRNA	-1.37369	0.0435432	ACYPI007680
ACYPI004291-RA RefSeq transcript XM_001950236 PREDICTED: Acyrthosiphon pisum similar to geko CG13695-PB (LOC100163191), mRNA	-1.36723	0.0355306	ACYPI004291	uncharacterized protein
ACYPI55935-RA Glean transcript GLEAN_35935	-1.36449	0.00468404	ACYPI55935
ACYPI002030-RA RefSeq transcript XM_001945553 PREDICTED: Acyrthosiphon pisum hypothetical protein LOC100160759 (LOC100160759), mRNA	-1.36445	0.0459803
ACYPI20427-RA Glean transcript GLEAN_00427	-1.36363	0.00391931	ACYPI20427
ACYPI24522-RA Glean transcript GLEAN_04522	-1.35711	0.026757
ACYPI45677-RA Glean transcript GLEAN_25677	-1.34592	0.0499086
ACYPI30083-RA Glean transcript GLEAN_10083	-1.33764	0.0386808	ACYPI30083
ACYPI39364-RA Glean transcript GLEAN_19364	-1.33548	0.0114826	ACYPI39364	uncharacterized protein
ACYPI007833-RA RefSeq transcript XM_001951686 PREDICTED: Acyrthosiphon pisum hypothetical protein LOC100167008 (LOC100167008), mRNA	-1.33435	0.00154724	ACYPI007833
ACYPI25453-RA Glean transcript GLEAN_05453	-1.33201	0.0115912	ACYPI007664
ACYPI005568-RA RefSeq transcript XM_001943601 PREDICTED: Acyrthosiphon pisum similar to CG17646 CG17646-PA (LOC100164565), mRNA	-1.33133	0.0263315	ACYPI005568
ACYPI52562-RA Glean transcript GLEAN_32562	-1.32949	0.015845	ACYPI52562	uncharacterized protein
ACYPI46511-RA Glean transcript GLEAN_26511	-1.32822	0.0444674	ACYPI46511
ACYPI27432-RA Glean transcript GLEAN_07432	-1.32741	0.0166292	ACYPI27432
ACYPI009412-RA RefSeq transcript XM_001945327 PREDICTED: Acyrthosiphon pisum similar to galactokinase 2 (LOC100168735), mRNA	-1.32245	0.0020155	ACYPI009412	galactokinase 1
ACYPI34045-RA Glean transcript GLEAN_14045	-1.32098	0.00502086
ACYPI008513-RA RefSeq transcript XM_001948997 PREDICTED: Acyrthosiphon pisum similar to CG6000 CG6000-PA (LOC100167746), mRNA	-1.31786	0.0106034	ACYPI008513
ACYPI000358-RA RefSeq transcript XM_001944777 PREDICTED: Acyrthosiphon pisum similar to radical S-adenosyl methionine domain containing 2 (LOC100158941), mRNA	-1.31651	0.0161804	ACYPI000358
ACYPI000696-RA RefSeq transcript XM_001951863 PREDICTED: Acyrthosiphon pisum hypothetical protein LOC100159312 (LOC100159312), partial mRNA	-1.31315	0.0121631	ACYPI000696
ACYPI51533-RA Glean transcript GLEAN_31533	-1.31233	0.0311731	ACYPI51533
ACYPI006011-RA RefSeq transcript XM_001946666 PREDICTED: Acyrthosiphon pisum similar to AGAP010560-PA (LOC100165039), mRNA	-1.30995	0.0172799	ACYPI000584
ACYPI007044-RA RefSeq transcript XM_001951244 PREDICTED: Acyrthosiphon pisum similar to Dyslexia susceptibility 1 candidate gene 1 protein (LOC100166145), mRNA	-1.30835	0.0254365	ACYPI007044
ACYPI006154-RA RefSeq transcript XM_001946299 PREDICTED: Acyrthosiphon pisum similar to gag-pol polyprotein precursor; hypothetical protein (LOC100165193), mRNA	-1.30555	0.0244595
ACYPI41120-RA Glean transcript GLEAN_21120	-1.29907	0.0211448
ACYPI33527-RA Glean transcript GLEAN_13527	-1.29601	0.00410756	ACYPI33527	uncharacterized protein
ACYPI43068-RA Glean transcript GLEAN_23068	-1.293	0.0448217
ACYPI005573-RA RefSeq transcript XM_001950851 PREDICTED: Acyrthosiphon pisum hypothetical protein LOC100164570 (LOC100164570), mRNA	-1.29051	0.0149191	ACYPI005573	uncharacterized protein
ACYPI005779-RA RefSeq transcript XM_001943036 PREDICTED: Acyrthosiphon pisum similar to tan CG12120-PA (LOC100164792), mRNA	-1.28146	0.0211448	ACYPI005779
ACYPI002468-RA RefSeq transcript XM_001945831 PREDICTED: Acyrthosiphon pisum similar to AGAP004476-PA (LOC100161228), mRNA	-1.27078	0.0421554	ACYPI002468	Chromaffin granule amine transporter
ACYPI006979-RA RefSeq transcript XM_001946782 PREDICTED: Acyrthosiphon pisum similar to CG4562 CG4562-PA (LOC100166076), mRNA	-1.26974	0.00516308	ACYPI006979	multidrug resistance protein 2 atp-binding cassette protein c
ACYPI42066-RA Glean transcript GLEAN_22066	-1.25629	0.012887	ACYPI071959	uncharacterized protein
ACYPI003323-RA RefSeq transcript XM_001948537 PREDICTED: Acyrthosiphon pisum similar to AGAP002536-PA (LOC100162151), mRNA	-1.2549	0.0196282	ACYPI003323	uncharacterized protein
ACYPI003795-RA RefSeq transcript XM_001945633 PREDICTED: Acyrthosiphon pisum similar to suppressor of cytokine signaling 9 (LOC100162652), mRNA	-1.24927	0.0125423	ACYPI003795
ACYPI40424-RA Glean transcript GLEAN_20424	-1.24413	0.0307246	ACYPI088733
ACYPI005719-RA RefSeq transcript XM_001947786 PREDICTED: Acyrthosiphon pisum similar to viperin (LOC100164729), mRNA	-1.23795	0.0198742	ACYPI005719
ACYPI005162-RA RefSeq transcript XM_001943318 PREDICTED: Acyrthosiphon pisum similar to GA17817-PA (LOC100164123), mRNA	-1.2368	0.0125423	ACYPI005162	AGAP002235-PA
ACYPI003934-RA RefSeq transcript XM_001951098 PREDICTED: Acyrthosiphon pisum similar to AGAP001957-PA (LOC100162809), mRNA	-1.22931	0.00213962	ACYPI003934	phosphatidylinositol transfer protein/retinal degeneration b protein
ACYPI33009-RA Glean transcript GLEAN_13009	-1.22929	0.0407568
ACYPI31247-RA Glean transcript GLEAN_11247	-1.22786	0.0282013
ACYPI22172-RA Glean transcript GLEAN_02172	-1.22642	0.0307246
ACYPI008133-RA RefSeq transcript XM_001943041 PREDICTED: Acyrthosiphon pisum similar to GA10915-PA (LOC100167329), mRNA	-1.22414	0.0338769	ACYPI008133
ACYPI008526-RA RefSeq transcript XM_001948499 PREDICTED: Acyrthosiphon pisum hypothetical protein LOC100167760 (LOC100167760), partial mRNA	-1.22224	0.0238276	ACYPI28448
ACYPI37965-RA Glean transcript GLEAN_17965	-1.22194	0.0288133	ACYPI37965
ACYPI37008-RA Glean transcript GLEAN_17008	-1.2217	0.038242	ACYPI082235
ACYPI007340-RA RefSeq transcript XM_001943040 PREDICTED: Acyrthosiphon pisum similar to choline transporter-like protein 2 (LOC100166472), mRNA	-1.21953	0.0156752	ACYPI007340	CTL-like protein 2
ACYPI003308-RA RefSeq transcript XM_001951513 PREDICTED: Acyrthosiphon pisum similar to Senescence marker protein-30 CG7390-PA (LOC100162135), mRNA	-1.21746	0.000585623	ACYPI003308	anterior fat body protein
ACYPI003108-RA RefSeq transcript XM_001943913 PREDICTED: Acyrthosiphon pisum similar to AGAP005840-PA (LOC100161921), mRNA	-1.21689	0.026757	ACYPI001728
ACYPI38852-RA Glean transcript GLEAN_18852	-1.21148	0.0121631
ACYPI31113-RA Glean transcript GLEAN_11113	-1.20957	0.0248282
ACYPI53276-RA Glean transcript GLEAN_33276	-1.20105	0.0121631	ACYPI53276
ACYPI002443-RA RefSeq transcript XM_001952515 PREDICTED: Acyrthosiphon pisum similar to lysosomal acid lipase (LOC100161202), mRNA	-1.19422	0.0288133	ACYPI002443	Gastric triacylglycerol lipase
ACYPI004298-RA RefSeq transcript XM_001942511 PREDICTED: Acyrthosiphon pisum similar to DRAK1 (LOC100163198), mRNA	-1.19311	0.026757
ACYPI006540-RA RefSeq transcript XM_001946285 PREDICTED: Acyrthosiphon pisum similar to AGAP007253-PA (LOC100165605), mRNA	-1.19157	0.0456868	ACYPI007141	hippocampus abundant transcript 1 protein
ACYPI008071-RA RefSeq transcript XM_001949833 PREDICTED: Acyrthosiphon pisum similar to CG17322 CG17322-PD (LOC100167261), partial mRNA	-1.1845	0.0117523	ACYPI008071	CG17322
ACYPI003503-RA RefSeq transcript XM_001948472 PREDICTED: Acyrthosiphon pisum hypothetical protein LOC100162346 (LOC100162346), mRNA	-1.18358	0.040615	ACYPI003503	uncharacterized protein
ACYPI22479-RA Glean transcript GLEAN_02479	-1.1818	0.0499086	ACYPI22479	uncharacterized protein
ACYPI52909-RA Glean transcript GLEAN_32909	-1.18085	0.0196282
ACYPI006800-RA RefSeq transcript XM_001946293 PREDICTED: Acyrthosiphon pisum similar to lim homeobox protein (LOC100165883), mRNA	-1.168	0.0379912	ACYPI006800
ACYPI009109-RA RefSeq transcript XM_001948825 PREDICTED: Acyrthosiphon pisum hypothetical protein LOC100168405 (LOC100168405), mRNA	-1.16718	0.0459803	ACYPI009109	uncharacterized protein
ACYPI46402-RA Glean transcript GLEAN_26402	-1.1608	0.0263922	ACYPI46402
ACYPI002572-RA RefSeq transcript XM_001944404 PREDICTED: Acyrthosiphon pisum similar to synaptic vesicle protein (LOC100161342), mRNA	-1.15849	0.034204	ACYPI002572
ACYPI002152-RA RefSeq transcript XM_001949168 PREDICTED: Acyrthosiphon pisum similar to glucosyl/glucuronosyl transferases (LOC100160886), mRNA	-1.15019	0.0459803	ACYPI002152	Glucosyl/glucuronosyl transferases
ACYPI004354-RA RefSeq transcript XM_001947174 PREDICTED: Acyrthosiphon pisum similar to AGAP004457-PA (LOC100163256), mRNA	-1.15015	0.00289421	ACYPI004354
ACYPI27909-RA Glean transcript GLEAN_07909	-1.14543	0.0424361	ACYPI27909
ACYPI36247-RA Glean transcript GLEAN_16247	-1.14414	0.0322477	ACYPI36247
ACYPI007906-RA RefSeq transcript XM_001943496 PREDICTED: Acyrthosiphon pisum similar to Mitochondrial sodium/hydrogen exchanger NHA2 (Mitochondrial Na(+)/H(+) exchanger NHA2) (Sodium/hydrogen exchanger-like domain-containing protein 2) (Na(+)/H(+) exchanger-like domain-containing protein 2) (NHE domain-containing protein 2)... (LOC100167085), mRNA	-1.12885	0.0263922	ACYPI007906
ACYPI000982-RA RefSeq transcript XM_001942770 PREDICTED: Acyrthosiphon pisum similar to AGAP007736-PA (LOC100159627), mRNA	-1.12507	0.0313028	ACYPI000982
ACYPI55028-RA Glean transcript GLEAN_35028	-1.11924	0.0173183
ACYPI50513-RA Glean transcript GLEAN_30513	-1.11725	0.0378222
ACYPI20762-RA Glean transcript GLEAN_00762	-1.11624	0.032007
ACYPI32451-RA Glean transcript GLEAN_12451	-1.11275	0.0370895
ACYPI004221-RA RefSeq transcript XM_001950272 PREDICTED: Acyrthosiphon pisum similar to conserved hypothetical protein (LOC100163113), mRNA	-1.11081	0.029841	ACYPI004221
ACYPI004700-RA RefSeq transcript XM_001945617 PREDICTED: Acyrthosiphon pisum similar to CG3556 CG3556-PA (LOC100163627), mRNA	-1.10794	0.0271654	ACYPI004700
ACYPI40538-RA Glean transcript GLEAN_20538	-1.10761	0.0405161	ACYPI40538
ACYPI003459-RA RefSeq transcript XM_001950590 PREDICTED: Acyrthosiphon pisum similar to CG11136 CG11136-PA (LOC100162299), mRNA	-1.10647	0.0156752	ACYPI003459	Cys-loop ligand-gated ion channel subunit-like protein
ACYPI24301-RA Glean transcript GLEAN_04301	-1.10375	0.0412829
ACYPI000105-RA RefSeq transcript XM_001943142 PREDICTED: Acyrthosiphon pisum similar to ring canal kelch protein (LOC100158665), partial mRNA	-1.10133	0.0311731	ACYPI000105	ring canal kelch protein
ACYPI000409-RA RefSeq transcript XM_001947578 PREDICTED: Acyrthosiphon pisum similar to conserved hypothetical protein (LOC100158995), mRNA	-1.10025	0.0412829	ACYPI000409	uncharacterized protein
ACYPI006008-RA RefSeq transcript XM_001944829 PREDICTED: Acyrthosiphon pisum similar to GA14759-PA (LOC100165035), mRNA	-1.09969	0.0117523	ACYPI006008
ACYPI000123-RA RefSeq transcript XM_001948675 PREDICTED: Acyrthosiphon pisum similar to GlcAT-P CG6207-PA (LOC100158683), mRNA	-1.09621	0.0120539	ACYPI000123
ACYPI39401-RA Glean transcript GLEAN_19401	-1.09586	0.0324317
ACYPI010219-RA RefSeq transcript XM_001947627 PREDICTED: Acyrthosiphon pisum similar to serine 3-dehydrogenase (LOC100169616), mRNA	-1.09147	0.0488391	ACYPI010219	antdh-PA
ACYPI51536-RA Glean transcript GLEAN_31536	-1.09084	0.0301061	ACYPI51536	Serine protease snake
ACYPI47907-RA Glean transcript GLEAN_27907	-1.09025	0.0338769
ACYPI31879-RA Glean transcript GLEAN_11879	-1.07337	0.0283256
ACYPI005293-RA RefSeq transcript XM_001943223 PREDICTED: Acyrthosiphon pisum hypothetical protein LOC100164262 (LOC100164262), mRNA	-1.06571	0.0299912	ACYPI20040	smile protein
ACYPI34814-RA Glean transcript GLEAN_14814	-1.05923	0.0325999
ACYPI55338-RA Glean transcript GLEAN_35338	-1.05858	0.0459803	ACYPI55338
ACYPI36941-RA Glean transcript GLEAN_16941	-1.05181	0.0435432	ACYPI36941
ACYPI005866-RA RefSeq transcript XM_001949937 PREDICTED: Acyrthosiphon pisum similar to aldehyde dehydrogenase (LOC100164885), mRNA	-1.04788	0.0196282
ACYPI42550-RA Glean transcript GLEAN_22550	-1.04741	0.0347638	ACYPI42550	uncharacterized protein
ACYPI40032-RA Glean transcript GLEAN_20032	-1.04427	0.0412829
ACYPI25875-RA Glean transcript GLEAN_05875	-1.04084	0.026757	ACYPI25875	uncharacterized protein
ACYPI002605-RA RefSeq transcript XM_001947022 PREDICTED: Acyrthosiphon pisum similar to AGAP009657-PA (LOC100161381), mRNA	-1.03655	0.0316878	ACYPI002605
ACYPI000445-RA RefSeq transcript XM_001942899 PREDICTED: Acyrthosiphon pisum similar to inhibitor of apoptosis 1, diap1 (LOC100159034), mRNA	-1.0283	0.0434658	ACYPI000445
ACYPI002611-RA RefSeq transcript XM_001952345 PREDICTED: Acyrthosiphon pisum similar to acyl-protein thioesterase 1,2 (LOC100161387), mRNA	-1.02612	0.0120516	ACYPI002611
ACYPI003921-RA RefSeq transcript XM_001951329 PREDICTED: Acyrthosiphon pisum similar to superoxide dismutase (AGAP005234-PA) (LOC100162795), mRNA	-1.0228	0.0134721	ACYPI003921	Superoxide dismutase [Cu-Zn]
ACYPI24838-RA Glean transcript GLEAN_04838	-1.01988	0.0337661
ACYPI47388-RA Glean transcript GLEAN_27388	-1.01786	0.039261	ACYPI47388	uncharacterized protein
ACYPI52907-RA Glean transcript GLEAN_32907	-1.01477	0.0486697
ACYPI007232-RA RefSeq transcript XM_001944067 PREDICTED: Acyrthosiphon pisum similar to CG31116 CG31116-PE (LOC100166352), mRNA	-1.01355	0.0166292	ACYPI007232
ACYPI44366-RA Glean transcript GLEAN_24366	-1.01286	0.0244815	ACYPI44366
ACYPI33772-RA Glean transcript GLEAN_13772	-1.00646	0.0457922	ACYPI33772
ACYPI007727-RA RefSeq transcript XM_001952651 PREDICTED: Acyrthosiphon pisum similar to ADAM metalloprotease (LOC100166889), partial mRNA	-1.00604	0.0484861	ACYPI007727
ACYPI002861-RA RefSeq transcript XM_001947469 PREDICTED: Acyrthosiphon pisum hypothetical protein LOC100161655 (LOC100161655), mRNA	-0.996158	0.026757	ACYPI002861
ACYPI005552-RA RefSeq transcript XM_001948331 PREDICTED: Acyrthosiphon pisum similar to Sorting nexin 4 (LOC100164545), mRNA	-0.986204	0.0243994	ACYPI005552	sorting nexin-4
ACYPI005975-RA RefSeq transcript XM_001947713 PREDICTED: Acyrthosiphon pisum similar to AGAP007340-PB (LOC100165001), mRNA	-0.97483	0.0265541	ACYPI005975	glucose transporter
ACYPI008852-RA RefSeq transcript XM_001950711 PREDICTED: Acyrthosiphon pisum similar to UDP-N-acetylglucosamine transporter (LOC100168125), mRNA	-0.973425	0.0120516	ACYPI008852
ACYPI003707-RA RefSeq transcript XM_001951471 PREDICTED: Acyrthosiphon pisum similar to AGAP003357-PA (LOC100162560), mRNA	-0.971361	0.032007	ACYPI003707
ACYPI37648-RA Glean transcript GLEAN_17648	-0.969384	0.0459803
ACYPI005240-RA RefSeq transcript XM_001951572 PREDICTED: Acyrthosiphon pisum similar to anterior fat body protein (LOC100164205), mRNA	-0.964786	0.0282013	ACYPI005240
ACYPI005080-RA RefSeq transcript XM_001943132 PREDICTED: Acyrthosiphon pisum similar to p38 map kinase (LOC100164036), partial mRNA	-0.954815	0.0115912	ACYPI081647	Mitogen-activated protein kinase 14
ACYPI48767-RA Glean transcript GLEAN_28767	-0.951469	0.032007	ACYPI48767	uncharacterized protein
ACYPI000789-RA RefSeq transcript XM_001952329 PREDICTED: Acyrthosiphon pisum similar to CG16787 CG16787-PA (LOC100159416), mRNA	-0.950555	0.0439065	ACYPI000789	uncharacterized protein
ACYPI004304-RA RefSeq transcript XM_001952217 PREDICTED: Acyrthosiphon pisum similar to FAD1 flavin adenine dinucleotide synthetase homolog (LOC100163204), mRNA	-0.949538	0.0222353	ACYPI004304
ACYPI000989-RA RefSeq transcript XM_001944181 PREDICTED: Acyrthosiphon pisum hypothetical protein LOC100159635 (LOC100159635), mRNA	-0.934368	0.0131275	ACYPI002891
ACYPI006627-RA RefSeq transcript XM_001944389 PREDICTED: Acyrthosiphon pisum similar to CG6574 CG6574-PA (LOC100165696), mRNA	-0.933634	0.0238276	ACYPI006627
ACYPI31293-RA Glean transcript GLEAN_11293	-0.933564	0.0492747	ACYPI31294	uncharacterized protein
ACYPI003868-RB RefSeq transcript XM_001944017 PREDICTED: Acyrthosiphon pisum similar to CG7945 CG7945-PB, transcript variant 2 (LOC100162734), mRNA	-0.932024	0.0180091	ACYPI003868	uncharacterized protein
ACYPI26177-RA Glean transcript GLEAN_06177	-0.928769	0.0470412
ACYPI003513-RA RefSeq transcript XM_001948052 PREDICTED: Acyrthosiphon pisum similar to GA10464-PA (LOC100162356), mRNA	-0.928311	0.0339331	ACYPI003513
ACYPI008014-RA RefSeq transcript XM_001949977 PREDICTED: Acyrthosiphon pisum similar to AGAP001417-PA (LOC100167201), mRNA	-0.927795	0.044846	ACYPI008014	uncharacterized protein
ACYPI003014-RA RefSeq transcript XM_001948821 PREDICTED: Acyrthosiphon pisum similar to CG8311 CG8311-PA (LOC100161817), mRNA	-0.923917	0.0198742	ACYPI003014	Transmembrane protein 15
ACYPI004629-RA RefSeq transcript XM_001945716 PREDICTED: Acyrthosiphon pisum similar to AGAP005129-PA (LOC100163548), mRNA	-0.923645	0.0185308	ACYPI004629
ACYPI005156-RA RefSeq transcript XM_001948448 PREDICTED: Acyrthosiphon pisum similar to slimfast CG11128-PC (LOC100164115), mRNA	-0.923438	0.0424361	ACYPI005156	cationic amino acid transporter
ACYPI005328-RA RefSeq transcript XM_001949965 PREDICTED: Acyrthosiphon pisum hypothetical protein LOC100164299 (LOC100164299), mRNA	-0.92202	0.0360773	ACYPI005328	uncharacterized protein
ACYPI008310-RA RefSeq transcript XM_001948588 PREDICTED: Acyrthosiphon pisum similar to predicted protein (LOC100167516), mRNA	-0.915592	0.0292661	ACYPI008310
ACYPI38454-RA Glean transcript GLEAN_18454	-0.911036	0.0347638
ACYPI001725-RA RefSeq transcript XM_001946873 PREDICTED: Acyrthosiphon pisum similar to ring canal kelch protein (LOC100160428), mRNA	-0.910711	0.0378222	ACYPI001725	Kelch-like protein 3
ACYPI006647-RA RefSeq transcript XM_001948164 PREDICTED: Acyrthosiphon pisum similar to Na+/H+ exchanger domain containing 2 (LOC100165718), mRNA	-0.902644	0.0255355	ACYPI006647	Mitochondrial sodium/hydrogen exchanger NHA2
ACYPI007534-RA RefSeq transcript XM_001952565 PREDICTED: Acyrthosiphon pisum similar to ion transport-like protein (LOC100166680), mRNA	-0.893772	0.00591348	ACYPI007534	Ion transport peptide-like
ACYPI26032-RA Glean transcript GLEAN_06032	-0.886094	0.0263922	ACYPI26032	juvenile hormone-inducible protein
ACYPI005887-RA RefSeq transcript XM_001948994 PREDICTED: Acyrthosiphon pisum similar to vitellogenin-1 (LOC100164907), mRNA	-0.886014	0.0258576	ACYPI005887	Pancreatic lipase-related protein 2
ACYPI004517-RA RefSeq transcript XM_001943530 PREDICTED: Acyrthosiphon pisum similar to sugar transporter (LOC100163428), partial mRNA	-0.878445	0.0291847	ACYPI004517
ACYPI008334-RA RefSeq transcript XM_001947332 PREDICTED: Acyrthosiphon pisum similar to CG4433 CG4433-PB (LOC100167541), mRNA	-0.877055	0.0146489	ACYPI069438
ACYPI007342-RA RefSeq transcript XM_001945657 PREDICTED: Acyrthosiphon pisum similar to Annexin IX CG5730-PC (LOC100166474), mRNA	-0.8738	0.0205309	ACYPI007342	Annexin A7
ACYPI003440-RA RefSeq transcript XM_001944055 PREDICTED: Acyrthosiphon pisum hypothetical protein LOC100162280 (LOC100162280), mRNA	-0.872192	0.0182185	ACYPI003440	uncharacterized protein
ACYPI005147-RA RefSeq transcript XM_001950925 PREDICTED: Acyrthosiphon pisum similar to predicted protein (LOC100164106), mRNA	-0.871504	0.0435657	ACYPI005147	uncharacterized protein
ACYPI009215-RA RefSeq transcript XM_001944482 PREDICTED: Acyrthosiphon pisum similar to conserved hypothetical protein (LOC100168523), mRNA	-0.862898	0.0377577	ACYPI009215	uncharacterized protein
ACYPI002694-RA RefSeq transcript XM_001946837 PREDICTED: Acyrthosiphon pisum similar to fructose-1,6-bisphosphatase (LOC100161475), mRNA	-0.859742	0.0459803	ACYPI002694	Septin-4
ACYPI20625-RA Glean transcript GLEAN_00625	-0.855515	0.0212921	ACYPI20625	uncharacterized protein
ACYPI41884-RA Glean transcript GLEAN_21884	-0.853714	0.0434658
ACYPI001648-RA RefSeq transcript XM_001945704 PREDICTED: Acyrthosiphon pisum similar to AGAP004842-PB (LOC100160345), mRNA	-0.852581	0.0220655	ACYPI001648
ACYPI008115-RA RefSeq transcript XM_001950982 PREDICTED: Acyrthosiphon pisum similar to pyridoxine kinase (LOC100167309), mRNA	-0.851664	0.0355306	ACYPI008115	pyridoxal kinase
ACYPI000746-RA RefSeq transcript XM_001942568 PREDICTED: Acyrthosiphon pisum similar to leucine-rich transmembrane protein (LOC100159369), mRNA	-0.849427	0.0338769	ACYPI000746
ACYPI001234-RA RefSeq transcript XM_001949320 PREDICTED: Acyrthosiphon pisum similar to CG12006 CG12006-PB (LOC100159894), partial mRNA	-0.840089	0.0131497	ACYPI001234
ACYPI29083-RA Glean transcript GLEAN_09083	-0.839406	0.0311731	ACYPI29083
ACYPI45215-RA Glean transcript GLEAN_25215	-0.833949	0.0171557
ACYPI001073-RA RefSeq transcript XM_001942792 PREDICTED: Acyrthosiphon pisum similar to Vps8 protein (LOC100159723), mRNA	-0.830556	0.0459803	ACYPI001073	Vacuolar protein sorting-associated protein 8-like protein
ACYPI009369-RA RefSeq transcript XM_001950915 PREDICTED: Acyrthosiphon pisum similar to CG13282 CG13282-PA (LOC100168690), mRNA	-0.805677	0.0464972	ACYPI009369	IP11746p
ACYPI45591-RA Glean transcript GLEAN_25591	-0.801091	0.0417425
ACYPI010072-RA RefSeq transcript XM_001942876 PREDICTED: Acyrthosiphon pisum similar to Choline/ethanolamine kinase (LOC100169456), mRNA	-0.794044	0.0359846	ACYPI010072
ACYPI000202-RA RefSeq transcript XM_001946819 PREDICTED: Acyrthosiphon pisum similar to GA15415-PA (LOC100158767), mRNA	-0.793316	0.0241745	ACYPI000202
ACYPI002000-RA RefSeq transcript XM_001951809 PREDICTED: Acyrthosiphon pisum similar to putative glyoxylate reductase/hydroxypyruvate reductase (LOC100160724), mRNA	-0.782278	0.0144398	ACYPI002000
ACYPI008550-RA RefSeq transcript XM_001952381 PREDICTED: Acyrthosiphon pisum similar to glutathione S-transferase (LOC100167788), mRNA	-0.779577	0.0495775	ACYPI008550
ACYPI005510-RA RefSeq transcript XM_001945732 PREDICTED: Acyrthosiphon pisum similar to GA17703-PA (LOC100164497), mRNA	-0.768003	0.0332453	ACYPI005510
ACYPI51351-RA Glean transcript GLEAN_31351	-0.765513	0.0343248
ACYPI003468-RA RefSeq transcript XM_001950705 PREDICTED: Acyrthosiphon pisum similar to Slc35b3 protein (LOC100162308), mRNA	-0.763286	0.0407568	ACYPI003468
ACYPI009394-RA RefSeq transcript XM_001944896 PREDICTED: Acyrthosiphon pisum similar to adenylsulfate kinase (LOC100168716), mRNA	-0.759254	0.0247374
ACYPI50787-RA Glean transcript GLEAN_30787	-0.753546	0.0307246	ACYPI50787	CG30344
ACYPI33330-RA Glean transcript GLEAN_13330	-0.73057	0.0421554
ACYPI008582-RA RefSeq transcript XM_001944621 PREDICTED: Acyrthosiphon pisum similar to AGAP009278-PA (LOC100167824), mRNA	-0.730094	0.0407568
ACYPI001039-RA RefSeq transcript XM_001945612 PREDICTED: Acyrthosiphon pisum similar to cleft lip and palate transmembrane protein 1 (LOC100159689), mRNA	-0.718224	0.0421554	ACYPI001039	Cleft lip and palate transmembrane protein 1
ACYPI006665-RA RefSeq transcript XM_001946965 PREDICTED: Acyrthosiphon pisum similar to zinc finger protein 39 (LOC100165736), mRNA	-0.717307	0.0337661	ACYPI006665	Pita
ACYPI001211-RA RefSeq transcript XM_001952262 PREDICTED: Acyrthosiphon pisum similar to CG3803 CG3803-PA (LOC100159870), mRNA	-0.716669	0.0381111	ACYPI001211
ACYPI005588-RA RefSeq transcript XM_001944075 PREDICTED: Acyrthosiphon pisum similar to TH1 CG9984-PA (LOC100164592), mRNA	-0.714172	0.0295175	ACYPI005588	Negative elongation factor C/D
ACYPI009724-RA RefSeq transcript XM_001947266 PREDICTED: Acyrthosiphon pisum similar to predicted protein (LOC100169071), partial mRNA	-0.708457	0.0359846	ACYPI009724	uncharacterized protein
ACYPI007287-RA RefSeq transcript XM_001951908 PREDICTED: Acyrthosiphon pisum similar to n-acetylgalactosaminyltransferase, transcript variant 1 (LOC100166413), mRNA	-0.70527	0.0473934
ACYPI24618-RA Glean transcript GLEAN_04618	-0.704723	0.0479021	ACYPI24618
ACYPI000024-RA RefSeq transcript NM_001126152 gi|187109135|ref|NM_001126152.1 Acyrthosiphon pisum ATP synthase, subunit d (Atpsyn-d), mRNA	-0.699595	0.0239898	ACYPI000024
ACYPI38042-RA Glean transcript GLEAN_18042	-0.697434	0.048788	ACYPI38042	GF11096
ACYPI005908-RA RefSeq transcript XM_001943820 PREDICTED: Acyrthosiphon pisum similar to CG9536 CG9536-PA (LOC100164930), mRNA	-0.693566	0.0342223	ACYPI005908	uncharacterized protein
ACYPI005032-RA RefSeq transcript XM_001945879 PREDICTED: Acyrthosiphon pisum similar to CG13605 CG13605-PA (LOC100163984), mRNA	-0.686398	0.0121631	ACYPI005032
ACYPI006518-RA RefSeq transcript XM_001945625 PREDICTED: Acyrthosiphon pisum similar to crotonobetainyl-CoA-hydratase, putative (LOC100165582), mRNA	-0.684062	0.0313028	ACYPI006518	crotonobetainyl-coa-hydratase
ACYPI25199-RA Glean transcript GLEAN_05199	-0.679191	0.0121631	ACYPI25199
ACYPI007023-RA RefSeq transcript XM_001944289 PREDICTED: Acyrthosiphon pisum hypothetical protein LOC100166124 (LOC100166124), mRNA	-0.662399	0.0378222	ACYPI007023
ACYPI007365-RA RefSeq transcript XM_001950465 PREDICTED: Acyrthosiphon pisum similar to GA21720-PA (LOC100166499), mRNA	-0.652342	0.0145852	ACYPI007365	CG9350
ACYPI007265-RA RefSeq transcript XM_001946549 PREDICTED: Acyrthosiphon pisum similar to retinol dehydrogenase 11 (LOC100166388), mRNA	-0.65028	0.0146489	ACYPI007265	Retinol dehydrogenase 12 (All-trans and 9-cis)
ACYPI007511-RA RefSeq transcript XM_001946677 PREDICTED: Acyrthosiphon pisum similar to putative ferritin 2, transcript variant 1 (LOC100166657), mRNA	-0.648891	0.0222353	ACYPI007511
ACYPI002527-RA RefSeq transcript XM_001947037 PREDICTED: Acyrthosiphon pisum similar to AGAP010557-PA (LOC100161294), mRNA	-0.621405	0.032007	ACYPI002527
ACYPI003545-RA RefSeq transcript XM_001950818 PREDICTED: Acyrthosiphon pisum similar to Vacuolar ATP synthase 16 kDa proteolipid subunit (Ductin) (VHA16K) (LOC100162391), mRNA	-0.600685	0.0403856	ACYPI003545	V-type proton ATPase 16 kDa proteolipid subunit
ACYPI002488-RA RefSeq transcript XM_001949222 PREDICTED: Acyrthosiphon pisum similar to GA17485-PA (LOC100161253), mRNA	-0.581499	0.0407568	ACYPI002488	UPF0172 protein CG3501
ACYPI003105-RA RefSeq transcript XM_001952238 PREDICTED: Acyrthosiphon pisum similar to RGP1 retrograde golgi transport homolog (LOC100161918), mRNA	-0.533663	0.0459803	ACYPI003105	Retrograde Golgi transport protein RGP1-like protein
ACYPI007381-RA RefSeq transcript XM_001947566 PREDICTED: Acyrthosiphon pisum similar to electron-transfer-flavoprotein beta polypeptide (LOC100166517), mRNA	-0.529909	0.02812	ACYPI007381
ACYPI002167-RA RefSeq transcript XM_001942623 PREDICTED: Acyrthosiphon pisum similar to phosphatidylinositol glycan (LOC100160901), mRNA	-0.500919	0.0435432	ACYPI002167	GPI-anchor transamidase
ACYPI003170-RA RefSeq transcript XM_001945713 PREDICTED: Acyrthosiphon pisum similar to vacuolar ATP synthase subunit d 1 (LOC100161987), mRNA	-0.486891	0.0338769	ACYPI003170
ACYPI001001-RA RefSeq transcript XM_001948385 PREDICTED: Acyrthosiphon pisum similar to paramyosin, long form (LOC100159647), mRNA	3.67649	0.0368476	ACYPI001001
ACYPI008993-RA RefSeq transcript XM_001944512 PREDICTED: Acyrthosiphon pisum similar to calponin/transgelin (LOC100168275), mRNA	3.4986	0.00336203	ACYPI008993
ACYPI35813-RA Glean transcript GLEAN_15813	3.17137	0.0421834	ACYPI35813	SUMO-conjugating enzyme UBC9
ACYPI004654-RA RefSeq transcript XM_001944718 PREDICTED: Acyrthosiphon pisum similar to Collagen (LOC100163577), mRNA	3.06063	0.00627317	ACYPI004654	collagen alpha-2(IV) chain-like
ACYPI008521-RA RefSeq transcript XM_001944945 PREDICTED: Acyrthosiphon pisum similar to tripartite motif protein trim2,3 (LOC100167755), partial mRNA	2.98908	0.0170236	ACYPI008521
ACYPI008224-RA RefSeq transcript XM_001951836 PREDICTED: Acyrthosiphon pisum hypothetical protein LOC100167427 (LOC100167427), mRNA	2.90713	0.0146918	ACYPI008224	uncharacterized protein
ACYPI20904-RA Glean transcript GLEAN_00904	2.53491	0.026757	ACYPI20904
ACYPI007763-RA RefSeq transcript XM_001944010 PREDICTED: Acyrthosiphon pisum similar to GA16025-PA (LOC100166928), mRNA	2.49069	0.0161804	ACYPI007763	abc transporter
ACYPI006346-RA RefSeq transcript XM_001951823 PREDICTED: Acyrthosiphon pisum hypothetical protein LOC100165393 (LOC100165393), mRNA	2.46243	0.0257942	ACYPI006346
ACYPI002335-RA RefSeq transcript XM_001949461 PREDICTED: Acyrthosiphon pisum similar to cyclin-dependent kinaseregulatory subunit (LOC100161083), mRNA	2.3996	0.0196282	ACYPI002335
ACYPI007878-RA RefSeq transcript XM_001951237 PREDICTED: Acyrthosiphon pisum similar to Mitochondrial phosphate carrier protein CG4994-PA (LOC100167055), mRNA	2.37751	0.0247374	ACYPI007878
ACYPI40957-RA Glean transcript GLEAN_20957	2.37548	0.032007	ACYPI40957	Cytokine receptor
ACYPI28150-RA Glean transcript GLEAN_08150	2.34494	0.00410756
ACYPI001429-RA RefSeq transcript XM_001951408 PREDICTED: Acyrthosiphon pisum similar to importin alpha 1b (LOC100160104), mRNA	2.32714	0.0156752	ACYPI001429	karyopherin importin alpha
ACYPI21390-RA Glean transcript GLEAN_01390	2.2655	0.00410756	ACYPI21390	Kelch-like protein 3
ACYPI003378-RA RefSeq transcript XM_001944872 PREDICTED: Acyrthosiphon pisum similar to putative kelch-like protein 1 (LOC100162213), mRNA	2.26049	0.0459803	ACYPI003378
ACYPI53492-RA Glean transcript GLEAN_33492	2.20308	0.0459803	ACYPI53492	uncharacterized protein
ACYPI55152-RA Glean transcript GLEAN_35152	2.10549	0.0427438	ACYPI55152	uncharacterized protein
ACYPI53840-RA Glean transcript GLEAN_33840	2.10371	0.0421554	ACYPI53840
ACYPI31143-RA Glean transcript GLEAN_11143	2.08861	0.0347638	ACYPI086363
ACYPI006989-RA RefSeq transcript XM_001945204 PREDICTED: Acyrthosiphon pisum hypothetical protein LOC100166088 (LOC100166088), mRNA	2.08131	0.0198742	ACYPI006989
ACYPI008196-RA RefSeq transcript XM_001946343 PREDICTED: Acyrthosiphon pisum similar to cadherin (LOC100167397), mRNA	2.06514	0.0170236	ACYPI008196	Cadherin-23
ACYPI000745-RA RefSeq transcript XM_001949265 PREDICTED: Acyrthosiphon pisum similar to AGAP007489-PB (LOC100159368), mRNA	1.99413	0.00326824	ACYPI000745	secreted modular calcium-binding protein
ACYPI006391-RA RefSeq transcript XM_001944359 PREDICTED: Acyrthosiphon pisum similar to Ect3 CG3132-PA (LOC100165440), mRNA	1.98141	0.0196282
ACYPI28786-RA Glean transcript GLEAN_08786	1.97149	0.0381543	ACYPI28786
ACYPI003050-RA RefSeq transcript XM_001946218 PREDICTED: Acyrthosiphon pisum similar to Tudor domain-containing protein 6 (Antigen NY-CO-45) (Cancer/testis antigen 41.2) (CT41.2) (LOC100161858), mRNA	1.96692	0.014293	ACYPI003050
ACYPI24411-RA Glean transcript GLEAN_04411	1.91349	0.0131275	ACYPI24411
ACYPI003027-RA RefSeq transcript XM_001945672 PREDICTED: Acyrthosiphon pisum similar to Disabled CG9695-PA (LOC100161833), mRNA	1.90958	0.0149191	ACYPI003027
ACYPI008180-RA RefSeq transcript XM_001944248 PREDICTED: Acyrthosiphon pisum similar to myosin light chain kinase (LOC100167381), partial mRNA	1.89976	0.0482934	ACYPI008180	Titin
ACYPI005713-RA RefSeq transcript XM_001949409 PREDICTED: Acyrthosiphon pisum similar to lectin, putative (LOC100164723), mRNA	1.88288	0.0367414	ACYPI005713
ACYPI002202-RA RefSeq transcript XM_001945171 PREDICTED: Acyrthosiphon pisum similar to maleless CG11680-PA (LOC100160936), mRNA	1.87894	0.0313028	ACYPI002202	ATP-dependent RNA helicase A
ACYPI34210-RA Glean transcript GLEAN_14210	1.85603	0.0305024	ACYPI34210
ACYPI26943-RA Glean transcript GLEAN_06943	1.84474	0.0347638	ACYPI26943	uncharacterized protein
ACYPI009020-RA RefSeq transcript XM_001943414 PREDICTED: Acyrthosiphon pisum similar to Niemann-Pick Type C-1 CG5722-PA (LOC100168306), mRNA	1.83511	0.0156752	ACYPI009020	Niemann-Pick C1 protein
ACYPI008672-RA RefSeq transcript XM_001942707 PREDICTED: Acyrthosiphon pisum similar to aubergine protein (LOC100167925), mRNA	1.77721	0.0134721	ACYPI008672	Aubergine
ACYPI008376-RA RefSeq transcript XM_001944771 PREDICTED: Acyrthosiphon pisum similar to LOC398372 protein (LOC100167591), mRNA	1.7716	0.0119218	ACYPI008376
ACYPI37466-RA Glean transcript GLEAN_17466	1.76351	0.026757	ACYPI37466
ACYPI009293-RA RefSeq transcript XM_001948086 PREDICTED: Acyrthosiphon pisum similar to AGAP009284-PA (LOC100168610), mRNA	1.73547	0.026757	ACYPI009293
ACYPI005550-RA RefSeq transcript XM_001944849 PREDICTED: Acyrthosiphon pisum similar to Xsmad4a (LOC100164543), mRNA	1.71107	0.0459803	ACYPI005550	Medea
ACYPI005271-RA RefSeq transcript XM_001943886 PREDICTED: Acyrthosiphon pisum similar to GA12555-PA (LOC100164237), mRNA	1.69239	0.0265541	ACYPI005271	nurf-38
ACYPI45242-RA Glean transcript GLEAN_25242	1.6889	0.0399134
ACYPI39596-RA Glean transcript GLEAN_19596	1.67574	0.00410756	ACYPI39596
ACYPI001560-RA RefSeq transcript XM_001946575 PREDICTED: Acyrthosiphon pisum hypothetical protein LOC100160248 (LOC100160248), mRNA	1.66949	0.0448466	ACYPI001560
ACYPI002240-RA RefSeq transcript XM_001942553 PREDICTED: Acyrthosiphon pisum similar to coronin (LOC100160980), mRNA	1.66392	0.00415657	ACYPI002240	coro
ACYPI000390-RA RefSeq transcript XM_001945347 PREDICTED: Acyrthosiphon pisum similar to conserved hypothetical protein (LOC100158975), partial mRNA	1.65734	0.0271654	ACYPI000390	uncharacterized protein
ACYPI007969-RA RefSeq transcript XM_001943028 PREDICTED: Acyrthosiphon pisum similar to abnormal spindle CG6875-PA (LOC100167154), mRNA	1.65409	0.0258576	ACYPI007969	GA26850
ACYPI003311-RA RefSeq transcript XM_001943148 PREDICTED: Acyrthosiphon pisum similar to bazooka CG5055-PA (LOC100162138), mRNA	1.62292	0.0489451	ACYPI003311	partitioning defective
ACYPI34278-RA Glean transcript GLEAN_14278	1.61617	0.0241745
ACYPI24253-RA Glean transcript GLEAN_04253	1.61494	0.0254365	ACYPI24253	uncharacterized protein
ACYPI006704-RA RefSeq transcript XM_001946099 PREDICTED: Acyrthosiphon pisum similar to vasa-like protein (LOC100165779), mRNA	1.60611	0.0258576	ACYPI006704
ACYPI26071-RA Glean transcript GLEAN_06071	1.60307	0.014248	ACYPI44729	uncharacterized protein
ACYPI006893-RA RefSeq transcript XM_001943109 PREDICTED: Acyrthosiphon pisum similar to zinc finger protein, putative (LOC100165984), mRNA	1.58925	0.0459803	ACYPI006893
ACYPI005224-RA RefSeq transcript XM_001949373 PREDICTED: Acyrthosiphon pisum similar to Lin-9 homolog (mLin-9) (Type I interferon receptor beta chain-associated protein) (TUDOR gene similar 1 protein) (LOC100164188), mRNA	1.58349	0.0471604	ACYPI005224
ACYPI004274-RA RefSeq transcript XM_001947404 PREDICTED: Acyrthosiphon pisum similar to zinc finger protein, putative (LOC100163172), mRNA	1.57597	0.026757	ACYPI004274
ACYPI20414-RA Glean transcript GLEAN_00414	1.56263	0.026757	ACYPI20414	uncharacterized protein
ACYPI001162-RA RefSeq transcript XM_001944411 PREDICTED: Acyrthosiphon pisum similar to GA17762-PA (LOC100159815), mRNA	1.56238	0.0177859	ACYPI001162
ACYPI004180-RA RefSeq transcript XM_001943892 PREDICTED: Acyrthosiphon pisum similar to AGAP010874-PA (LOC100163069), mRNA	1.55765	0.00307821	ACYPI004180
ACYPI001952-RA RefSeq transcript XM_001943169 PREDICTED: Acyrthosiphon pisum similar to Probable RNA-directed DNA polymerase from transposon BS (Reverse transcriptase) (LOC100160672), mRNA	1.54784	0.024547	ACYPI001952
ACYPI44325-RA Glean transcript GLEAN_24325	1.53907	0.00154724	ACYPI44325	uncharacterized protein
ACYPI008828-RA RefSeq transcript XM_001948192 PREDICTED: Acyrthosiphon pisum similar to LD15043p (LOC100168098), mRNA	1.51433	0.00194265	ACYPI008828
ACYPI24865-RA Glean transcript GLEAN_04865	1.51361	0.0355306	ACYPI24865
ACYPI31791-RA Glean transcript GLEAN_11791	1.51085	0.0435432
ACYPI44607-RA Glean transcript GLEAN_24607	1.50883	0.0150664
ACYPI001279-RA RefSeq transcript XM_001943580 PREDICTED: Acyrthosiphon pisum similar to nuclear pore complex protein nup98 (LOC100159941), mRNA	1.50009	0.0139788	ACYPI001279
ACYPI006488-RA RefSeq transcript XM_001942821 PREDICTED: Acyrthosiphon pisum similar to androgen induced inhibitor of proliferation / pds5 (LOC100165546), mRNA	1.49866	0.0182185	ACYPI006488	Pds5
ACYPI009945-RA RefSeq transcript XM_001946977 PREDICTED: Acyrthosiphon pisum similar to egalitarian CG4051-PA (LOC100169316), mRNA	1.49485	0.0144398	ACYPI009945
ACYPI39044-RA Glean transcript GLEAN_19044	1.47534	0.0347638	ACYPI40001
ACYPI48770-RA Glean transcript GLEAN_28770	1.46492	0.0371267	ACYPI48770
ACYPI45710-RA Glean transcript GLEAN_25710	1.45956	0.00177087	ACYPI45710
ACYPI009574-RA RefSeq transcript XM_001943626 PREDICTED: Acyrthosiphon pisum similar to CG15160 CG15160-PA (LOC100168911), mRNA	1.44217	0.0113736	ACYPI007851
ACYPI48928-RA Glean transcript GLEAN_28928	1.43894	0.00289421	ACYPI48928
ACYPI38093-RA Glean transcript GLEAN_18093	1.42981	0.012887	ACYPI38093
ACYPI009169-RA RefSeq transcript XM_001943340 PREDICTED: Acyrthosiphon pisum similar to Z4 CG7752-PA (LOC100168473), mRNA	1.42847	0.00553097	ACYPI009169
ACYPI28043-RA Glean transcript GLEAN_08043	1.41099	0.0125827
ACYPI51232-RA Glean transcript GLEAN_31232	1.3905	0.0402133	ACYPI51232
ACYPI39352-RA Glean transcript GLEAN_19352	1.38909	0.0271593	ACYPI39352
ACYPI008147-RA RefSeq transcript XM_001943345 PREDICTED: Acyrthosiphon pisum similar to conserved hypothetical protein (LOC100167345), mRNA	1.37516	0.0120516	ACYPI008147	CG10311
ACYPI007248-RA RefSeq transcript XM_001946179 PREDICTED: Acyrthosiphon pisum similar to AGAP002226-PA (LOC100166369), mRNA	1.37136	0.0421554	ACYPI007248
ACYPI49716-RA Glean transcript GLEAN_29716	1.36364	0.0139788	ACYPI062161
ACYPI35224-RA Glean transcript GLEAN_15224	1.36227	0.0150664	ACYPI35224	uncharacterized protein
ACYPI006138-RA RefSeq transcript XM_001947679 PREDICTED: Acyrthosiphon pisum similar to ubiquitin-activating enzyme E1 (LOC100165176), mRNA	1.3589	0.00588395	ACYPI006138	SUMO-activating enzyme subunit 2
ACYPI003796-RA RefSeq transcript XM_001950050 PREDICTED: Acyrthosiphon pisum similar to AGAP008814-PA (LOC100162653), mRNA	1.34641	0.0457922	ACYPI003796	da
ACYPI008670-RA RefSeq transcript XM_001949390 PREDICTED: Acyrthosiphon pisum hypothetical protein LOC100167923 (LOC100167923), mRNA	1.34488	0.0480325	ACYPI008670	uncharacterized protein
ACYPI001827-RA RefSeq transcript XM_001943758 PREDICTED: Acyrthosiphon pisum similar to Trc8 CG2304-PA (LOC100160538), mRNA	1.33311	0.0347638	ACYPI001827
ACYPI004378-RA RefSeq transcript XM_001950774 PREDICTED: Acyrthosiphon pisum similar to AGAP004270-PA (LOC100163282), mRNA	1.32401	0.0117523	ACYPI004378	uncharacterized protein
ACYPI008287-RA RefSeq transcript XM_001948184 PREDICTED: Acyrthosiphon pisum similar to O-linked-mannose beta-1,2-N-acetylglucosaminyltransferase 1 (LOC100167491), mRNA	1.32273	0.0421554	ACYPI008287
ACYPI24384-RA Glean transcript GLEAN_04384	1.32082	0.0283256
ACYPI007556-RA RefSeq transcript XM_001952720 PREDICTED: Acyrthosiphon pisum similar to predicted protein (LOC100166705), mRNA	1.31972	0.032221	ACYPI007556	ATP-dependent DNA helicase 2 subunit 1
ACYPI39961-RA Glean transcript GLEAN_19961	1.30891	0.0459803
ACYPI40672-RA Glean transcript GLEAN_20672	1.30094	0.0135366	ACYPI40672
ACYPI005965-RA RefSeq transcript XM_001951006 PREDICTED: Acyrthosiphon pisum similar to limd1 (LOC100164991), mRNA	1.29515	0.0258576	ACYPI005965
ACYPI34264-RA Glean transcript GLEAN_14264	1.29236	0.0307246	ACYPI34264
ACYPI005644-RA RefSeq transcript XM_001943657 PREDICTED: Acyrthosiphon pisum similar to DNA replication licensing factor MCM3 (LOC100164651), mRNA	1.27537	0.0278652	ACYPI005644	DNA replication licensing factor MCM3
ACYPI48929-RA Glean transcript GLEAN_28929	1.27536	0.010768
ACYPI001659-RA RefSeq transcript XM_001943714 PREDICTED: Acyrthosiphon pisum similar to CG1244 CG1244-PA (LOC100160359), mRNA	1.25927	0.00468404	ACYPI001659
ACYPI010220-RA RefSeq transcript XM_001949148 PREDICTED: Acyrthosiphon pisum similar to yemanuclein (LOC100169617), mRNA	1.24629	0.0254365	ACYPI010220	uncharacterized protein
ACYPI001014-RA RefSeq transcript XM_001952745 PREDICTED: Acyrthosiphon pisum similar to AGAP002441-PA (LOC100159663), mRNA	1.24602	0.0196282
ACYPI004763-RA RefSeq transcript XM_001943524 PREDICTED: Acyrthosiphon pisum similar to histone acetyltransferase gcn5 (LOC100163698), mRNA	1.23827	0.0283256	ACYPI004763	histone acetyltransferase gcn5
ACYPI34728-RA Glean transcript GLEAN_14728	1.23113	0.0347615	ACYPI34728	Endonuclease-reverse transcriptase
ACYPI008477-RA RefSeq transcript XM_001945759 PREDICTED: Acyrthosiphon pisum similar to Z4 CG7752-PA (LOC100167708), mRNA	1.22982	0.0115912	ACYPI008477	Z4 CG7752-PA
ACYPI010158-RA RefSeq transcript XM_001951203 PREDICTED: Acyrthosiphon pisum similar to predicted protein (LOC100169550), partial mRNA	1.22613	0.0456868	ACYPI008655
ACYPI31437-RA Glean transcript GLEAN_11437	1.22238	0.0261341	ACYPI31437
ACYPI008455-RA RefSeq transcript XM_001945053 PREDICTED: Acyrthosiphon pisum similar to ATP/GTP binding protein 1 (LOC100167684), mRNA	1.21925	0.0258576	ACYPI009750	uncharacterized protein
ACYPI003871-RA RefSeq transcript XM_001945464 PREDICTED: Acyrthosiphon pisum similar to 3-hydroxyisobutyrate dehydrogenase (LOC100162738), mRNA	1.21473	0.0164249	ACYPI003871
ACYPI51911-RA Glean transcript GLEAN_31911	1.21473	0.0271873	ACYPI51911
ACYPI49437-RA Glean transcript GLEAN_29437	1.19882	0.0421554	ACYPI001712
ACYPI001893-RA RefSeq transcript XM_001949865 PREDICTED: Acyrthosiphon pisum similar to CG10341 CG10341-PB (LOC100160607), partial mRNA	1.19328	0.0173183	ACYPI001893	uncharacterized protein
ACYPI41751-RA Glean transcript GLEAN_21751	1.19257	0.0402133	ACYPI41751
ACYPI48837-RA Glean transcript GLEAN_28837	1.18863	0.0264372	ACYPI48837	uncharacterized protein
ACYPI30764-RA Glean transcript GLEAN_10764	1.18332	0.0360841	ACYPI30764
ACYPI32837-RA Glean transcript GLEAN_12837	1.18094	0.0499086	ACYPI32837
ACYPI006404-RA RefSeq transcript XM_001952239 PREDICTED: Acyrthosiphon pisum similar to DEAD box ATP-dependent RNA helicase (LOC100165453), mRNA	1.17858	0.0347615	ACYPI006404
ACYPI001069-RA RefSeq transcript XM_001951621 PREDICTED: Acyrthosiphon pisum similar to conserved hypothetical protein (LOC100159719), mRNA	1.16431	0.00307821	ACYPI001069
ACYPI009646-RA RefSeq transcript XM_001948828 PREDICTED: Acyrthosiphon pisum hypothetical protein LOC100168988 (LOC100168988), mRNA	1.13994	0.0407568	ACYPI009646	uncharacterized protein
ACYPI001257-RA RefSeq transcript XM_001944761 PREDICTED: Acyrthosiphon pisum similar to timeless homolog (Drosophila) (LOC100159918), mRNA	1.12965	0.0289848	ACYPI001257	Timeout
ACYPI006418-RA RefSeq transcript XM_001948686 PREDICTED: Acyrthosiphon pisum similar to AGAP009694-PA (LOC100165467), mRNA	1.12776	0.0410925	ACYPI006418
ACYPI007778-RA RefSeq transcript XM_001946083 PREDICTED: Acyrthosiphon pisum similar to rCG61559 (LOC100166946), mRNA	1.1246	0.0347638	ACYPI007778	dna mismatch repair protein msh3
ACYPI008884-RA RefSeq transcript XM_001944021 PREDICTED: Acyrthosiphon pisum similar to FERM domain containing 4A (LOC100168158), mRNA	1.12057	0.0236645	ACYPI008884
ACYPI002979-RA RefSeq transcript XM_001949498 PREDICTED: Acyrthosiphon pisum similar to CG10542 CG10542-PA (LOC100161782), mRNA	1.11782	0.0260994	ACYPI002979
ACYPI49727-RA Glean transcript GLEAN_29727	1.11529	0.00774883
ACYPI49937-RA Glean transcript GLEAN_29937	1.10493	0.0494656	ACYPI49937	uncharacterized protein
ACYPI001797-RA RefSeq transcript XM_001948255 PREDICTED: Acyrthosiphon pisum similar to conserved hypothetical protein (LOC100160506), mRNA	1.10111	0.0492289	ACYPI001797	pogo family transposase
ACYPI006790-RA RefSeq transcript XM_001943027 PREDICTED: Acyrthosiphon pisum similar to l(2)37Cb CG10689-PA (LOC100165872), mRNA	1.09965	0.00410756	ACYPI006790	pre-mrna splicing factor atp-dependent rna helicase prp16
ACYPI46438-RA Glean transcript GLEAN_26438	1.0965	0.0240327	ACYPI46438
ACYPI36410-RA Glean transcript GLEAN_16410	1.0841	0.0241745
ACYPI004948-RA RefSeq transcript XM_001945688 PREDICTED: Acyrthosiphon pisum similar to RNA-binding protein (LOC100163896), mRNA	1.08163	0.0488391	ACYPI004948
ACYPI36319-RA Glean transcript GLEAN_16319	1.07051	0.0284028
ACYPI008501-RA RefSeq transcript XM_001949282 PREDICTED: Acyrthosiphon pisum similar to cyclophilin (LOC100167734), mRNA	1.07027	0.0121631	ACYPI008501	peptidyl-prolyl cis-trans isomerase
ACYPI004569-RA RefSeq transcript XM_001950134 PREDICTED: Acyrthosiphon pisum similar to replication factors MCM (LOC100163482), mRNA	1.06997	0.0311731	ACYPI004569	DNA replication licensing factor MCM4
ACYPI003771-RA RefSeq transcript XM_001945108 PREDICTED: Acyrthosiphon pisum similar to AGAP011421-PA (LOC100162626), mRNA	1.06397	0.0377577	ACYPI003771	guanyl-nucleotide exchange factor
ACYPI001556-RA RefSeq transcript XM_001948146 PREDICTED: Acyrthosiphon pisum similar to pol protein (LOC100160242), mRNA	1.062	0.0459803	ACYPI001556	uncharacterized protein
ACYPI45211-RA Glean transcript GLEAN_25211	1.05862	0.0402133
ACYPI005017-RA RefSeq transcript XM_001950829 PREDICTED: Acyrthosiphon pisum similar to werner syndrome helicase (LOC100163969), mRNA	1.05616	0.0375708	ACYPI005017	Werner syndrome helicase
ACYPI002049-RA RefSeq transcript XM_001949901 PREDICTED: Acyrthosiphon pisum similar to Nucleolar transcription factor 1 (Upstream-binding factor 1) (UBF-1) (Autoantigen NOR-90) (LOC100160778), mRNA	1.05501	0.0339215	ACYPI002049
ACYPI43564-RA Glean transcript GLEAN_23564	1.05226	0.0170236	ACYPI43564
ACYPI30171-RA Glean transcript GLEAN_10171	1.05211	0.027584	ACYPI30171	uncharacterized protein
ACYPI004733-RA RefSeq transcript XM_001944428 PREDICTED: Acyrthosiphon pisum similar to putative innexin 3 (LOC100163664), mRNA	1.04863	0.0283256	ACYPI004733
ACYPI000800-RA RefSeq transcript XM_001947139 PREDICTED: Acyrthosiphon pisum similar to armitage CG11513-PA (LOC100159427), mRNA	1.04851	0.015845	ACYPI000800
ACYPI000555-RA RefSeq transcript XM_001946999 PREDICTED: Acyrthosiphon pisum similar to WD and tetratricopeptide repeats 1 (LOC100159157), mRNA	1.04444	0.0131275	ACYPI000555
ACYPI41019-RA Glean transcript GLEAN_21019	1.04199	0.0459803	ACYPI41019	uncharacterized protein
ACYPI004584-RA RefSeq transcript XM_001948355 PREDICTED: Acyrthosiphon pisum similar to mCG16334 (LOC100163498), mRNA	1.04129	0.00450058	ACYPI004584	mCG16334
ACYPI009118-RA RefSeq transcript XM_001952689 PREDICTED: Acyrthosiphon pisum similar to conserved hypothetical protein (LOC100168414), partial mRNA	1.04066	0.0121631	ACYPI009118
ACYPI007897-RA RefSeq transcript XM_001948505 PREDICTED: Acyrthosiphon pisum similar to DNA topoisomerase/gyrase (LOC100167074), mRNA	1.04029	0.0282013	ACYPI007897
ACYPI000557-RA RefSeq transcript XM_001945242 PREDICTED: Acyrthosiphon pisum similar to AGAP002246-PA (LOC100159159), mRNA	1.03565	0.0182185	ACYPI000557	Histone-lysine N-methyltransferase SETD1B
ACYPI005525-RB RefSeq transcript XM_001948010 PREDICTED: Acyrthosiphon pisum similar to AGAP007217-PA, transcript variant 2 (LOC100164514), mRNA	1.03392	0.0119218
ACYPI46304-RA Glean transcript GLEAN_26304	1.03307	0.0283256	ACYPI46304	120.7 kDa protein in NOF-FB transposable element
ACYPI001119-RA RefSeq transcript XM_001948857 PREDICTED: Acyrthosiphon pisum similar to DNA polymerase delta catalytic subunit (LOC100159771), mRNA	1.00367	0.0278123	ACYPI001119	DNA polymerase delta catalytic subunit
ACYPI007884-RA RefSeq transcript XM_001943140 PREDICTED: Acyrthosiphon pisum similar to histone deacetylase Rpd3 (LOC100167061), partial mRNA	0.995732	0.00748246	ACYPI007884	Histone deacetylase 3
ACYPI006305-RA RefSeq transcript XM_001949068 PREDICTED: Acyrthosiphon pisum similar to Muscle-specific protein 300 CG33715-PB (LOC100165351), partial mRNA	0.989838	0.0315947	ACYPI006305
ACYPI006807-RA RefSeq transcript XM_001942868 PREDICTED: Acyrthosiphon pisum similar to pre-mRNA splicing factor ATP-dependent RNA helicase PRP16 (LOC100165891), mRNA	0.984524	0.0121631	ACYPI006807	Pre-mRNA-splicing factor ATP-dependent RNA helicase PRP16
ACYPI007134-RA RefSeq transcript XM_001946680 PREDICTED: Acyrthosiphon pisum similar to mannosyltransferase 1, putative (LOC100166249), partial mRNA	0.98221	0.0322477	ACYPI007134	Protein O-mannosyl-transferase 2
ACYPI006180-RA RefSeq transcript XM_001946639 PREDICTED: Acyrthosiphon pisum similar to histone deacetylase (LOC100165220), partial mRNA	0.977586	0.0105057	ACYPI006180
ACYPI008846-RA RefSeq transcript XM_001945054 PREDICTED: Acyrthosiphon pisum similar to UPF2 regulator of nonsense transcripts homolog (LOC100168119), mRNA	0.968141	0.0251909	ACYPI008846	upf2 regulator of nonsense transcripts homolog
ACYPI001264-RA RefSeq transcript XM_001943158 PREDICTED: Acyrthosiphon pisum similar to bifunctional aminoacyl-tRNA synthetase (LOC100159925), mRNA	0.966164	0.0234979	ACYPI001264
ACYPI21610-RA Glean transcript GLEAN_01610	0.950405	0.036167	ACYPI21610
ACYPI28079-RA Glean transcript GLEAN_08079	0.949355	0.0347638	ACYPI28079
ACYPI50170-RA Glean transcript GLEAN_30170	0.948824	0.0219396
ACYPI003817-RA RefSeq transcript XM_001951895 PREDICTED: Acyrthosiphon pisum hypothetical protein LOC100162676 (LOC100162676), mRNA	0.946854	0.0125423	ACYPI003817	Protein AATF
ACYPI51218-RA Glean transcript GLEAN_31218	0.946422	0.0378222	ACYPI51218	uncharacterized protein
ACYPI001851-RA RefSeq transcript XM_001944284 PREDICTED: Acyrthosiphon pisum similar to WD repeat domain 19 (LOC100160563), mRNA	0.945922	0.0119218	ACYPI001851	wd repeat protein
ACYPI008037-RA RefSeq transcript XM_001948094 PREDICTED: Acyrthosiphon pisum similar to structural maintenance of chromosomes smc1 (LOC100167226), mRNA	0.939386	0.0330118	ACYPI008037	Structural maintenance of chromosomes protein 1A
ACYPI000365-RA RefSeq transcript XM_001946608 PREDICTED: Acyrthosiphon pisum similar to Smad4 (LOC100158948), mRNA	0.937188	0.0282013	ACYPI000365	mothers againstdecapentaplegic homolog 4 smad 4 mothers against dpp homolog 4 smad4
ACYPI25888-RA Glean transcript GLEAN_05888	0.935956	0.0308954
ACYPI46414-RA Glean transcript GLEAN_26414	0.934716	0.0280691
ACYPI002722-RA RefSeq transcript XM_001942627 PREDICTED: Acyrthosiphon pisum similar to AGAP012481-PA (LOC100161505), mRNA	0.931435	0.0497846	ACYPI002722	histone-lysine n-methyltransferase
ACYPI010221-RA RefSeq transcript XM_001951666 PREDICTED: Acyrthosiphon pisum similar to AGAP002474-PA (LOC100169618), mRNA	0.930665	0.0482934	ACYPI010221	cleavage and polyadenylation specificity factor subunit
ACYPI000968-RA RefSeq transcript XM_001945853 PREDICTED: Acyrthosiphon pisum similar to General transcription factor II-I repeat domain-containing protein 2A (GTF2I repeat domain-containing protein 2A) (Transcription factor GTF2IRD2-alpha) (LOC100159611), partial mRNA	0.927746	0.0281261	ACYPI000968
ACYPI004034-RA RefSeq transcript XM_001946068 PREDICTED: Acyrthosiphon pisum similar to helicase (LOC100162915), mRNA	0.927329	0.041486	ACYPI004034	transcriptional regulator atrx x-linked helicase ii
ACYPI006140-RA RefSeq transcript XM_001946030 PREDICTED: Acyrthosiphon pisum similar to wd-repeat protein (LOC100165179), mRNA	0.926011	0.0260994	ACYPI006140	Bromodomain and WD repeat-containing protein 3
ACYPI006362-RA RefSeq transcript XM_001947177 PREDICTED: Acyrthosiphon pisum similar to poly (LOC100165409), mRNA	0.922858	0.026757	ACYPI006362	drosophila sp./nad :proteinadp-ribosyl-transferase
ACYPI004047-RA RefSeq transcript XM_001945560 PREDICTED: Acyrthosiphon pisum similar to AGAP010700-PA (LOC100162928), mRNA	0.921988	0.0139788	ACYPI004047	Chromatin-remodeling complex ATPase chain Iswi
ACYPI006080-RA RefSeq transcript XM_001948271 PREDICTED: Acyrthosiphon pisum hypothetical protein LOC100165114 (LOC100165114), mRNA	0.921858	0.026757	ACYPI006080	uncharacterized protein
ACYPI42438-RA Glean transcript GLEAN_22438	0.918654	0.0263509
ACYPI009137-RA RefSeq transcript XM_001948398 PREDICTED: Acyrthosiphon pisum similar to AGAP011126-PA (LOC100168437), mRNA	0.911267	0.032007	ACYPI009137
ACYPI006521-RA RefSeq transcript XM_001948750 PREDICTED: Acyrthosiphon pisum similar to GA10660-PA (LOC100165585), mRNA	0.910129	0.0435257	ACYPI006521
ACYPI005925-RA RefSeq transcript XM_001951339 PREDICTED: Acyrthosiphon pisum similar to delangin (LOC100164947), partial mRNA	0.907985	0.0318204	ACYPI005925	nipped-b protein
ACYPI006170-RA RefSeq transcript XM_001951297 PREDICTED: Acyrthosiphon pisum similar to CRSP complex subunit 3 (LOC100165209), mRNA	0.904644	0.046931	ACYPI006170
ACYPI009443-RA RefSeq transcript XM_001947734 PREDICTED: Acyrthosiphon pisum similar to intersectin 2 (LOC100168769), mRNA	0.902879	0.0456868	ACYPI009443	band protein
ACYPI006581-RA RefSeq transcript XM_001951608 PREDICTED: Acyrthosiphon pisum hypothetical protein LOC100165648 (LOC100165648), mRNA	0.901898	0.00410756	ACYPI006581	rrp6
ACYPI20751-RA Glean transcript GLEAN_00751	0.894822	0.0241745
ACYPI48588-RA Glean transcript GLEAN_28588	0.894622	0.0407568	ACYPI48588
ACYPI001501-RA RefSeq transcript XM_001945158 PREDICTED: Acyrthosiphon pisum similar to Probable ATP-dependent RNA helicase kurz (LOC100160186), mRNA	0.892416	0.00549764	ACYPI001501	atp-dependent rna helicase kurz
ACYPI000355-RA RefSeq transcript XM_001950506 PREDICTED: Acyrthosiphon pisum similar to fibronectin type 3 and ankyrin repeat domains 1 (LOC100158938), mRNA	0.890824	0.0347638	ACYPI000355
ACYPI006463-RA RefSeq transcript XM_001944237 PREDICTED: Acyrthosiphon pisum similar to AGAP007924-PA (LOC100165518), partial mRNA	0.887741	0.0437235	ACYPI006463
ACYPI005208-RA RefSeq transcript XM_001951708 PREDICTED: Acyrthosiphon pisum similar to DEAD box ATP-dependent RNA helicase (LOC100164172), mRNA	0.88526	0.0347638	ACYPI005208
ACYPI008539-RA RefSeq transcript XM_001950778 PREDICTED: Acyrthosiphon pisum similar to Arsenite-resistance protein 2 homolog (LOC100167773), mRNA	0.885033	0.0115912	ACYPI008539
ACYPI002756-RA RefSeq transcript XM_001950396 PREDICTED: Acyrthosiphon pisum similar to Alanyl-tRNA synthetase CG13391-PA (LOC100161540), mRNA	0.87896	0.0125423	ACYPI002756
ACYPI37077-RA Glean transcript GLEAN_17077	0.866302	0.0435657	ACYPI37077	pogo family transposase
ACYPI002994-RA RefSeq transcript XM_001943311 PREDICTED: Acyrthosiphon pisum similar to Nucleolar pre-ribosomal-associated protein 1 (Protein URB1) (LOC100161797), mRNA	0.862356	0.0117523	ACYPI002994	Nucleolar pre-ribosomal-associated protein 1
ACYPI010149-RA RefSeq transcript XM_001951093 PREDICTED: Acyrthosiphon pisum similar to BMS1-like, ribosome assembly protein (LOC100169539), mRNA	0.857625	0.00468404	ACYPI010149	ribosome biogenesis protein bms1
ACYPI004507-RA RefSeq transcript XM_001943259 PREDICTED: Acyrthosiphon pisum similar to mutagen-sensitive 301 CG7972-PA (LOC100163417), mRNA	0.856464	0.0417425	ACYPI004507
ACYPI20033-RA Glean transcript GLEAN_00033	0.850541	0.0435274	ACYPI20033
ACYPI009283-RA RefSeq transcript XM_001944474 PREDICTED: Acyrthosiphon pisum similar to symplekin (LOC100168598), mRNA	0.848569	0.0185308	ACYPI009283
ACYPI001163-RA RefSeq transcript XM_001949328 PREDICTED: Acyrthosiphon pisum similar to RBD protein (LOC100159817), mRNA	0.845572	0.0475077	ACYPI001163	Cytoplasmic protein
ACYPI008806-RA RefSeq transcript XM_001948585 PREDICTED: Acyrthosiphon pisum similar to AGAP011678-PA (LOC100168070), mRNA	0.844696	0.026757	ACYPI008806	Transcription initiation factor TFIID subunit 5
ACYPI27155-RA Glean transcript GLEAN_07155	0.844346	0.0180091
ACYPI005125-RA RefSeq transcript XM_001947889 PREDICTED: Acyrthosiphon pisum similar to blooms syndrome DNA helicase (LOC100164084), partial mRNA	0.842372	0.034204	ACYPI005125	ATP-dependent DNA helicase hus2
ACYPI009173-RA RefSeq transcript XM_001949824 PREDICTED: Acyrthosiphon pisum similar to nuclear autoantigenic sperm protein (LOC100168477), mRNA	0.841434	0.0258576	ACYPI009173	uncharacterized protein
ACYPI30875-RA Glean transcript GLEAN_10875	0.838037	0.024547	ACYPI30875	Transposable element Tc3 transposase
ACYPI000905-RA RefSeq transcript XM_001951433 PREDICTED: Acyrthosiphon pisum similar to predicted protein (LOC100159545), mRNA	0.834584	0.0443272	ACYPI000905	uncharacterized protein
ACYPI004103-RA RefSeq transcript XM_001952353 PREDICTED: Acyrthosiphon pisum hypothetical protein LOC100162985 (LOC100162985), mRNA	0.833279	0.0146489	ACYPI004103
ACYPI000241-RA RefSeq transcript XM_001949131 PREDICTED: Acyrthosiphon pisum similar to DNA repair protein xp-c / rad4 (LOC100158815), mRNA	0.830042	0.0282013	ACYPI000241
ACYPI36318-RA Glean transcript GLEAN_16318	0.826827	0.0459803	ACYPI36318
ACYPI006575-RA RefSeq transcript XM_001945731 PREDICTED: Acyrthosiphon pisum similar to AGAP010700-PA (LOC100165641), mRNA	0.826051	0.0296457	ACYPI004047	Chromatin-remodeling complex ATPase chain Iswi
ACYPI001973-RA RefSeq transcript XM_001943634 PREDICTED: Acyrthosiphon pisum similar to MGC80116 protein (LOC100160694), mRNA	0.825618	0.0342223	ACYPI001973	MGC80116 protein
ACYPI009053-RA RefSeq transcript XM_001944163 PREDICTED: Acyrthosiphon pisum similar to YTH domain containing 2 (LOC100168344), mRNA	0.823863	0.0171557	ACYPI009053
ACYPI008724-RA RefSeq transcript XM_001948915 PREDICTED: Acyrthosiphon pisum similar to reptin (LOC100167982), mRNA	0.822517	0.02812	ACYPI008724
ACYPI006583-RA RefSeq transcript XM_001949724 PREDICTED: Acyrthosiphon pisum similar to AGAP003459-PA (LOC100165651), partial mRNA	0.816621	0.044846	ACYPI006583
ACYPI005579-RA RefSeq transcript XM_001950012 PREDICTED: Acyrthosiphon pisum similar to ras (LOC100164579), mRNA	0.814332	0.0238276	ACYPI005579	uncharacterized protein
ACYPI008463-RA RefSeq transcript XM_001948696 PREDICTED: Acyrthosiphon pisum similar to DNA-directed RNA polymerase I 135 kDa polypeptide (LOC100167692), mRNA	0.811906	0.0337661	ACYPI008463	DNA-directed RNA polymerase I subunit RPA2
ACYPI008727-RA RefSeq transcript XM_001947755 PREDICTED: Acyrthosiphon pisum similar to LOC495282 protein (LOC100167985), partial mRNA	0.78858	0.0135366	ACYPI008727	RRP12-like protein
ACYPI008254-RA RefSeq transcript XM_001945665 PREDICTED: Acyrthosiphon pisum similar to maf10 (LOC100167457), mRNA	0.781532	0.011234	ACYPI008254
ACYPI006371-RA RefSeq transcript XM_001949829 PREDICTED: Acyrthosiphon pisum similar to predicted protein (LOC100165419), mRNA	0.781474	0.02384	ACYPI006371	ATP-dependent RNA helicase DDX55
ACYPI004088-RA RefSeq transcript XM_001952333 PREDICTED: Acyrthosiphon pisum hypothetical protein LOC100162970 (LOC100162970), partial mRNA	0.77451	0.0499086	ACYPI081585	uncharacterized protein
ACYPI000065-RA RefSeq transcript NM_001126201 gi|187109137|ref|NM_001126201.1 Acyrthosiphon pisum 20S proteasome beta5 subunit (Prosbeta5), mRNA	0.774386	0.0122603	ACYPI000065
ACYPI004346-RA RefSeq transcript XM_001948643 PREDICTED: Acyrthosiphon pisum similar to protein phosphatase 2c (LOC100163248), mRNA	0.76832	0.0434658	ACYPI004346
ACYPI002280-RA RefSeq transcript XM_001943364 PREDICTED: Acyrthosiphon pisum similar to phd finger domain (LOC100161023), mRNA	0.765273	0.0341211	ACYPI002280	phd finger domain
ACYPI004982-RA RefSeq transcript XM_001951560 PREDICTED: Acyrthosiphon pisum similar to AGAP002600-PA (LOC100163932), mRNA	0.76136	0.0306621	ACYPI004982	polya polymerase
ACYPI002456-RA RefSeq transcript XM_001947468 PREDICTED: Acyrthosiphon pisum similar to CG33521 CG33521-PA (LOC100161216), mRNA	0.761207	0.0258576	ACYPI002456	LIM domain and actin-binding protein 1
ACYPI005382-RA RefSeq transcript XM_001951770 PREDICTED: Acyrthosiphon pisum similar to conserved hypothetical protein (LOC100164360), mRNA	0.761187	0.0125423	ACYPI005382
ACYPI51211-RA Glean transcript GLEAN_31211	0.757191	0.008211	ACYPI51211
ACYPI001354-RA RefSeq transcript XM_001943293 PREDICTED: Acyrthosiphon pisum similar to Protein phosphatase 1G (formerly 2C), magnesium-dependent, gamma (LOC100160020), mRNA	0.750337	0.0488391	ACYPI001354	protein phosphatase gamma
ACYPI003167-RA RefSeq transcript XM_001943557 PREDICTED: Acyrthosiphon pisum similar to maleless protein (LOC100161984), mRNA	0.749676	0.02812
ACYPI28695-RA Glean transcript GLEAN_08695	0.74962	0.0466616
ACYPI001509-RA RefSeq transcript XM_001949429 PREDICTED: Acyrthosiphon pisum similar to AGAP001145-PA (LOC100160194), mRNA	0.746257	0.0234979	ACYPI001509	Pre-mRNA-splicing factor 38A
ACYPI000828-RA RefSeq transcript XM_001949722 PREDICTED: Acyrthosiphon pisum similar to Nat10 protein (LOC100159459), mRNA	0.744385	0.0439065	ACYPI000828
ACYPI006226-RA RefSeq transcript XM_001950263 PREDICTED: Acyrthosiphon pisum similar to MGC81066 protein (LOC100165268), mRNA	0.741778	0.044846	ACYPI006226	Nucleolar protein 6
ACYPI003445-RA RefSeq transcript XM_001949423 PREDICTED: Acyrthosiphon pisum similar to hypoxia associated factor (LOC100162285), mRNA	0.738033	0.0421554	ACYPI003445	U4/U6.U5 tri-snRNP-associated protein
ACYPI002580-RA RefSeq transcript XM_001949455 PREDICTED: Acyrthosiphon pisum similar to CG4527-PB (LOC100161351), mRNA	0.736221	0.0421554	ACYPI002580
ACYPI005470-RA RefSeq transcript XM_001943951 PREDICTED: Acyrthosiphon pisum similar to pleiotropic regulator 1 (LOC100164452), mRNA	0.733085	0.0238276	ACYPI005470	Pre-mRNA-splicing factor prp46
ACYPI000459-RA RefSeq transcript XM_001944962 PREDICTED: Acyrthosiphon pisum similar to transcriptional repressor CTCF (LOC100159049), mRNA	0.726961	0.0417425	ACYPI062376
ACYPI54976-RA Glean transcript GLEAN_34976	0.726847	0.0432365	ACYPI54976	hypothetical protein
ACYPI52571-RA Glean transcript GLEAN_32571	0.719486	0.0311731	ACYPI52571	Chromatin modification-related protein YNG2
ACYPI47326-RA Glean transcript GLEAN_27326	0.716327	0.0435432
ACYPI27239-RA Glean transcript GLEAN_07239	0.713382	0.0166292	ACYPI27239	Gag-pol polyprotein
ACYPI35042-RA Glean transcript GLEAN_15042	0.711169	0.0418569	ACYPI35042
ACYPI002808-RA RefSeq transcript XM_001942865 PREDICTED: Acyrthosiphon pisum similar to combgap CG8367-PE (LOC100161597), mRNA	0.707369	0.0226054	ACYPI002808
ACYPI006135-RA RefSeq transcript XM_001949115 PREDICTED: Acyrthosiphon pisum similar to Uncharacterized protein C15orf41 homolog (LOC100165173), mRNA	0.706285	0.0278123	ACYPI006135
ACYPI003204-RA RefSeq transcript XM_001946289 PREDICTED: Acyrthosiphon pisum similar to histone deacetylase (LOC100162023), mRNA	0.702587	0.0459803	ACYPI003204	Histone deacetylase 3
ACYPI27953-RA Glean transcript GLEAN_07953	0.693305	0.0236534	ACYPI082391
ACYPI010226-RA RefSeq transcript XM_001942551 PREDICTED: Acyrthosiphon pisum similar to kinesin light chain 1 and (LOC100169624), mRNA	0.689913	0.0114283	ACYPI010226
ACYPI39081-RA Glean transcript GLEAN_19081	0.689126	0.0337661
ACYPI21713-RA Glean transcript GLEAN_01713	0.685398	0.0459803	ACYPI21713
ACYPI36759-RA Glean transcript GLEAN_16759	0.678747	0.0284028
ACYPI36719-RA Glean transcript GLEAN_16719	0.678467	0.0466616
ACYPI009292-RA RefSeq transcript XM_001950330 PREDICTED: Acyrthosiphon pisum similar to IRA1 protein (LOC100168609), mRNA	0.678423	0.0459803	ACYPI009292	wd-repeat protein
ACYPI007644-RA RefSeq transcript XM_001943058 PREDICTED: Acyrthosiphon pisum similar to transducin beta-like 3 (LOC100166802), mRNA	0.671878	0.0232526	ACYPI007644	Katanin p80 WD40-containing subunit B1
ACYPI000966-RA RefSeq transcript XM_001944047 PREDICTED: Acyrthosiphon pisum similar to AGAP001917-PA (LOC100159609), mRNA	0.666911	0.0254365	ACYPI000966
ACYPI006615-RA RefSeq transcript XM_001950255 PREDICTED: Acyrthosiphon pisum similar to rrp4 (LOC100165683), mRNA	0.665716	0.0329095	ACYPI006615	Exosome complex component RRP4
ACYPI009953-RA RefSeq transcript XM_001952674 PREDICTED: Acyrthosiphon pisum similar to CG7728 CG7728-PA (LOC100169324), mRNA	0.655686	0.02812	ACYPI010149	ribosome biogenesis protein bms1
ACYPI001111-RA RefSeq transcript XM_001946058 PREDICTED: Acyrthosiphon pisum similar to ubiquitin-conjugating enyzme E2r (LOC100159762), mRNA	0.651004	0.0337661	ACYPI001111	Ubiquitin carrier protein
ACYPI003886-RA RefSeq transcript XM_001949172 PREDICTED: Acyrthosiphon pisum similar to Nat1 CG12202-PA (LOC100162755), partial mRNA	0.645601	0.0254365	ACYPI003886
ACYPI006412-RA RefSeq transcript XM_001948711 PREDICTED: Acyrthosiphon pisum similar to DEAD box RNA helicase (LOC100165461), mRNA	0.633937	0.0359846	ACYPI006412
ACYPI003641-RA RefSeq transcript XM_001952055 PREDICTED: Acyrthosiphon pisum similar to CG11859 CG11859-PA (LOC100162491), mRNA	0.633073	0.0459803	ACYPI003641
ACYPI47906-RA Glean transcript GLEAN_27906	0.628978	0.0337661	ACYPI47906
ACYPI21810-RA Glean transcript GLEAN_01810	0.626134	0.0408274
ACYPI000264-RA RefSeq transcript XM_001949087 PREDICTED: Acyrthosiphon pisum similar to BACH1, putative (LOC100158842), mRNA	0.609448	0.0240327	ACYPI000264	uncharacterized protein
ACYPI001246-RA RefSeq transcript XM_001943679 PREDICTED: Acyrthosiphon pisum similar to CG8545 CG8545-PA (LOC100159906), mRNA	0.596465	0.0459803	ACYPI001246	proliferating-cell nucleolar antigen p120
ACYPI001224-RA RefSeq transcript XM_001949231 PREDICTED: Acyrthosiphon pisum similar to Zinc finger CW-type PWWP domain protein 1 (LOC100159884), mRNA	0.589073	0.0278123	ACYPI006933	uncharacterized protein
ACYPI006185-RA RefSeq transcript XM_001945037 PREDICTED: Acyrthosiphon pisum similar to GA18135-PA (LOC100165225), mRNA	0.58858	0.0347524	ACYPI006185	Pescadillo homolog
ACYPI004206-RA RefSeq transcript XM_001947837 PREDICTED: Acyrthosiphon pisum similar to helicase (LOC100163098), mRNA	0.581054	0.0170236	ACYPI004206
ACYPI007519-RA RefSeq transcript XM_001943563 PREDICTED: Acyrthosiphon pisum similar to pre-mRNA-splicing helicase BRR2 (LOC100166665), mRNA	0.57428	0.0432365	ACYPI007519	activating signal cointegrator 1 complex subunit
D4 YFØ vs AP3
ACYPI V1	log2FC	Adjusted P-value	ACYPI V2.1c	Product
ACYPI000460-RA RefSeq transcript XM_001943190 PREDICTED: Acyrthosiphon pisum similar to phytoene dehydrogenase (LOC100159050), partial mRNA	-1.73431	0.0271414	ACYPI000460
ACYPI004416-RA RefSeq transcript XM_001950614 PREDICTED: Acyrthosiphon pisum similar to acyl-protein thioesterase 1,2 (LOC100163322), mRNA	-1.29353	0.020385	ACYPI004416
ACYPI23871-RA Glean transcript GLEAN_03871	-0.899903	0.020385	ACYPI23871
ACYPI006258-RA RefSeq transcript XM_001944794 PREDICTED: Acyrthosiphon pisum similar to GA21321-PA (LOC100165301), mRNA	2.91165	0.0271414	ACYPI006258
ACYPI000211-RA RefSeq transcript XM_001943451 PREDICTED: Acyrthosiphon pisum similar to AGAP005713-PA (LOC100158776), mRNA	2.38809	0.020385	ACYPI000211	fibulin 1 and
ACYPI003723-RA RefSeq transcript XM_001945824 PREDICTED: Acyrthosiphon pisum similar to pH sensitive chloride channel (LOC100162577), partial mRNA	2.14187	0.0304877	ACYPI003723
D5 YFØ vs AP3
ACYPI V1	log2FC	Adjusted P-value	ACYPI V2.1c	Product
ACYPI005547-RA RefSeq transcript XM_001949737 PREDICTED: Acyrthosiphon pisum similar to cuticular protein CPG12 (LOC100164538), mRNA	-3.1581	0.0201486	ACYPI005547	uncharacterized protein
ACYPI009653-RA RefSeq transcript XM_001947630 PREDICTED: Acyrthosiphon pisum similar to predicted protein (LOC100168995), mRNA	-3.02719	0.00622706	ACYPI009653
ACYPI25204-RA Glean transcript GLEAN_05204	-2.83234	0.00021169	ACYPI087834
ACYPI42940-RA Glean transcript GLEAN_22940	-2.80862	6.82605e-05
ACYPI003561-RA RefSeq transcript XM_001949689 PREDICTED: Acyrthosiphon pisum hypothetical protein LOC100162409, transcript variant 1 (LOC100162409), mRNA	-2.50862	0.0411524	ACYPI003561
ACYPI005742-RA RefSeq transcript XM_001949180 PREDICTED: Acyrthosiphon pisum hypothetical protein LOC100164752 (LOC100164752), mRNA	-2.4486	0.0381201	ACYPI083810	uncharacterized protein
ACYPI001281-RA RefSeq transcript XM_001943617 PREDICTED: Acyrthosiphon pisum similar to cathepsin B (LOC100159943), mRNA	-2.42723	0.00681968	ACYPI001281	Cathepsin B
ACYPI24002-RA Glean transcript GLEAN_04002	-2.40552	0.00425604	ACYPI24002
ACYPI005575-RA RefSeq transcript XM_001943030 PREDICTED: Acyrthosiphon pisum hypothetical protein LOC100164574 (LOC100164574), mRNA	-2.36897	0.00237843	ACYPI087272	uncharacterized protein
ACYPI007575-RA RefSeq transcript XM_001943238 PREDICTED: Acyrthosiphon pisum similar to oviductin (LOC100166724), mRNA	-2.34482	0.0260273	ACYPI007575
ACYPI45107-RA Glean transcript GLEAN_25107	-2.22072	0.00415712
ACYPI25395-RA Glean transcript GLEAN_05395	-2.05711	0.0105726
ACYPI47464-RA Glean transcript GLEAN_27464	-1.95284	0.0144967
ACYPI26706-RA Glean transcript GLEAN_06706	-1.85241	0.00224527
ACYPI40993-RA Glean transcript GLEAN_20993	-1.83729	6.26474e-05	ACYPI40993
ACYPI38649-RA Glean transcript GLEAN_18649	-1.74484	0.00648083
ACYPI25573-RA Glean transcript GLEAN_05573	-1.68418	0.00927662	ACYPI25573
ACYPI49956-RA Glean transcript GLEAN_29956	-1.61723	0.0062429	ACYPI49956	uncharacterized protein
ACYPI46394-RA Glean transcript GLEAN_26394	-1.58548	6.26474e-05	ACYPI46394	uncharacterized protein
ACYPI002249-RA RefSeq transcript XM_001951214 PREDICTED: Acyrthosiphon pisum similar to conserved hypothetical protein (LOC100160990), partial mRNA	-1.54553	0.0440814	ACYPI002249	uncharacterized protein
ACYPI24297-RA Glean transcript GLEAN_04297	-1.51946	0.0439802
ACYPI23344-RA Glean transcript GLEAN_03344	-1.50874	0.00802329	ACYPI23344	hypothetical protein
ACYPI006394-RA RefSeq transcript XM_001946191 PREDICTED: Acyrthosiphon pisum similar to Actin (LOC100165443), mRNA	-1.41693	0.00237843	ACYPI006394
ACYPI24004-RA Glean transcript GLEAN_04004	-1.39877	0.00781166
ACYPI27197-RA Glean transcript GLEAN_07197	-1.38351	0.0238677
ACYPI38188-RA Glean transcript GLEAN_18188	-1.35895	0.0250711	ACYPI38188	rho-type gtpase activating protein
ACYPI007284-RA RefSeq transcript XM_001948780 PREDICTED: Acyrthosiphon pisum similar to zinc finger protein, putative (LOC100166409), mRNA	-1.3568	0.00364587	ACYPI007284
ACYPI54421-RA Glean transcript GLEAN_34421	-1.35463	0.0151227
ACYPI006416-RA RefSeq transcript XM_001945339 PREDICTED: Acyrthosiphon pisum similar to Histone H4 replacement CG3379-PC (LOC100165465), mRNA	-1.34868	0.0144967	ACYPI088094
ACYPI40463-RA Glean transcript GLEAN_20463	-1.34065	0.0245809	ACYPI40463	uncharacterized protein
ACYPI52909-RA Glean transcript GLEAN_32909	-1.31651	0.0132577
ACYPI38798-RA Glean transcript GLEAN_18798	-1.31141	0.0359891
ACYPI24246-RA Glean transcript GLEAN_04246	-1.2929	0.00868225	ACYPI24246
ACYPI41040-RA Glean transcript GLEAN_21040	-1.26406	0.0300671
ACYPI008355-RA RefSeq transcript XM_001945987 PREDICTED: Acyrthosiphon pisum similar to AGAP005008-PA (LOC100167568), partial mRNA	-1.24771	0.0144967	ACYPI008355
ACYPI52562-RA Glean transcript GLEAN_32562	-1.24663	0.0412824	ACYPI52562	uncharacterized protein
ACYPI20427-RA Glean transcript GLEAN_00427	-1.23909	0.00927662	ACYPI20427
ACYPI30105-RA Glean transcript GLEAN_10105	-1.23444	0.0176088
ACYPI49079-RA Glean transcript GLEAN_29079	-1.22977	0.0367468
ACYPI37105-RA Glean transcript GLEAN_17105	-1.19379	0.0437893	ACYPI37105
ACYPI39338-RA Glean transcript GLEAN_19338	-1.18615	0.0163216
ACYPI20940-RA Glean transcript GLEAN_00940	-1.16786	0.018354
ACYPI50167-RA Glean transcript GLEAN_30167	-1.10143	0.0340115	ACYPI50167
ACYPI33527-RA Glean transcript GLEAN_13527	-1.01755	0.0367468	ACYPI33527	uncharacterized protein
ACYPI009710-RA RefSeq transcript XM_001945039 PREDICTED: Acyrthosiphon pisum hypothetical protein LOC100169057 (LOC100169057), mRNA	-0.849753	0.0437893	ACYPI009710
ACYPI000539-RA RefSeq transcript XM_001949696 PREDICTED: Acyrthosiphon pisum similar to macoilin-2 (LOC100159141), mRNA	-0.809244	0.0263839	ACYPI000539
ACYPI27904-RA Glean transcript GLEAN_07904	-0.770144	0.0465155	ACYPI27904
ACYPI22937-RA Glean transcript GLEAN_02937	-0.686353	0.0454915	ACYPI22937	lreo_3
ACYPI006258-RA RefSeq transcript XM_001944794 PREDICTED: Acyrthosiphon pisum similar to GA21321-PA (LOC100165301), mRNA	3.86833	6.9538e-05	ACYPI006258
ACYPI003723-RA RefSeq transcript XM_001945824 PREDICTED: Acyrthosiphon pisum similar to pH sensitive chloride channel (LOC100162577), partial mRNA	3.53147	2.53618e-06	ACYPI003723
ACYPI009703-RA RefSeq transcript XM_001948416 PREDICTED: Acyrthosiphon pisum hypothetical protein LOC100169049 (LOC100169049), mRNA	2.98891	0.0200897	ACYPI21300	uncharacterized protein
ACYPI000856-RA RefSeq transcript XM_001950100 PREDICTED: Acyrthosiphon pisum similar to arylalkylamine N-acetyltransferase (LOC100159490), mRNA	2.91029	0.0216902	ACYPI000856	Arylalkylamine N-acetyltransferase
ACYPI007472-RA RefSeq transcript XM_001948340 PREDICTED: Acyrthosiphon pisum hypothetical protein LOC100166615 (LOC100166615), mRNA	2.60048	6.26474e-05	ACYPI007472	uncharacterized protein
ACYPI005094-RA RefSeq transcript XM_001943576 PREDICTED: Acyrthosiphon pisum similar to sulfate transporter (LOC100164052), mRNA	2.5844	0.00111409	ACYPI005094	Prestin
ACYPI002542-RA RefSeq transcript XM_001943701 PREDICTED: Acyrthosiphon pisum similar to RE46682p (LOC100161310), mRNA	2.5612	0.000318681	ACYPI002542	RE46682p
ACYPI009011-RB RefSeq transcript XM_001950244 PREDICTED: Acyrthosiphon pisum similar to MPA13 allergen, transcript variant 2 (LOC100168295), mRNA	2.53879	0.00164513
ACYPI27660-RA Glean transcript GLEAN_07660	2.53635	0.00913361	ACYPI005663
ACYPI33598-RA Glean transcript GLEAN_13598	2.51697	0.00021169	ACYPI003487
ACYPI006131-RA RefSeq transcript XM_001950142 PREDICTED: Acyrthosiphon pisum similar to GA13986-PA (LOC100165169), mRNA	2.41502	0.00622706	ACYPI006131
ACYPI002260-RA RefSeq transcript XM_001942890 PREDICTED: Acyrthosiphon pisum similar to predicted protein (LOC100161002), mRNA	2.32804	0.00346656	ACYPI002260
ACYPI006957-RA RefSeq transcript XM_001952620 PREDICTED: Acyrthosiphon pisum similar to retinal degeneration B CG11111-PA (LOC100166053), mRNA	2.30254	8.66311e-05	ACYPI006957	Protein retinal degeneration B
ACYPI006898-RA RefSeq transcript XM_001945052 PREDICTED: Acyrthosiphon pisum similar to mitochondrial ornithine transporter (LOC100165989), mRNA	2.29909	0.00531678	ACYPI006898
ACYPI003740-RA RefSeq transcript XM_001944564 PREDICTED: Acyrthosiphon pisum similar to cytochrome P450 CYP6AY1 protein (LOC100162594), mRNA	2.28225	0.0144967	ACYPI003740
ACYPI004532-RA RefSeq transcript XM_001951801 PREDICTED: Acyrthosiphon pisum similar to 24-dehydrocholesterol reductase (LOC100163443), mRNA	2.27124	0.00164513	ACYPI004532	delta(24)-sterol reductase-like
ACYPI004409-RA RefSeq transcript XM_001946633 PREDICTED: Acyrthosiphon pisum similar to AGAP005816-PA (LOC100163315), mRNA	2.21782	0.00224527	ACYPI004409	BAI1-associated protein 3
ACYPI003083-RA RefSeq transcript XM_001949851 PREDICTED: Acyrthosiphon pisum similar to Tripeptidyl-peptidase 2 (Tripeptidyl-peptidase II) (TPP-II) (Tripeptidyl aminopeptidase) (LOC100161895), partial mRNA	2.20187	0.00976831	ACYPI003083
ACYPI004647-RA RefSeq transcript XM_001943079 PREDICTED: Acyrthosiphon pisum similar to CG15528 CG15528-PA (LOC100163569), mRNA	2.05965	0.0184543	ACYPI004647
ACYPI003299-RA RefSeq transcript XM_001945172 PREDICTED: Acyrthosiphon pisum similar to MGC84061 protein (LOC100162125), mRNA	2.04792	0.000318681	ACYPI003299	uncharacterized protein
ACYPI000530-RA RefSeq transcript XM_001949540 PREDICTED: Acyrthosiphon pisum similar to conserved hypothetical protein (LOC100159131), mRNA	2.0389	0.0370056	ACYPI000530
ACYPI004674-RA RefSeq transcript XM_001946922 PREDICTED: Acyrthosiphon pisum similar to arrestin1 (LOC100163599), mRNA	2.03868	0.00868225	ACYPI004674	Beta-arrestin-1
ACYPI28741-RA Glean transcript GLEAN_08741	2.01734	0.0286515	ACYPI28741
ACYPI006264-RA RefSeq transcript XM_001950607 PREDICTED: Acyrthosiphon pisum similar to CG15117 CG15117-PA (LOC100165307), mRNA	2.01158	0.0238677	ACYPI006264
ACYPI006357-RA RefSeq transcript XM_001950781 PREDICTED: Acyrthosiphon pisum similar to CG9706 CG9706-PA (LOC100165404), mRNA	1.94125	0.00442672	ACYPI006357	acetyl-coenzyme a transporter
ACYPI002122-RA RefSeq transcript XM_001943529 PREDICTED: Acyrthosiphon pisum similar to diaphanous (LOC100160854), mRNA	1.91415	0.0437893	ACYPI002122
ACYPI005498-RA RefSeq transcript XM_001945437 PREDICTED: Acyrthosiphon pisum similar to dally (LOC100164483), mRNA	1.8857	0.0412824	ACYPI005498
ACYPI41494-RA Glean transcript GLEAN_21494	1.87649	0.0118784	ACYPI001449	GTP-binding protein RAD
ACYPI010248-RA RefSeq transcript XM_001942883 PREDICTED: Acyrthosiphon pisum similar to AGAP002816-PA (LOC100169648), partial mRNA	1.87641	0.027457	ACYPI010248	uncharacterized protein
ACYPI002665-RA RefSeq transcript XM_001949588 PREDICTED: Acyrthosiphon pisum similar to beadex/dLMO protein (LOC100161445), mRNA	1.85248	0.0260273	ACYPI002665	beadex/dlmo protein
ACYPI50514-RA Glean transcript GLEAN_30514	1.83496	0.018354	ACYPI50514
ACYPI50162-RA Glean transcript GLEAN_30162	1.82394	0.0433788	ACYPI50162
ACYPI001649-RA RefSeq transcript XM_001943546 PREDICTED: Acyrthosiphon pisum similar to GA18131-PA (LOC100160347), mRNA	1.82361	0.00246757	ACYPI001649	bumetanide-sensitive na-k-cl cotransport protein
ACYPI007742-RA RefSeq transcript XM_001943486 PREDICTED: Acyrthosiphon pisum similar to sugar transporter (LOC100166904), mRNA	1.81094	0.0163216	ACYPI007742	Sugar transporter 7
ACYPI008757-RA RefSeq transcript XM_001950978 PREDICTED: Acyrthosiphon pisum similar to vacuolar protein sorting 35 (LOC100168020), mRNA	1.76916	0.0201486	ACYPI008757	Vacuolar protein sorting-associated protein 35
ACYPI005676-RA RefSeq transcript XM_001944236 PREDICTED: Acyrthosiphon pisum similar to exostoses (multiple) 2 (LOC100164685), mRNA	1.73928	0.0169596	ACYPI005676
ACYPI006780-RA RefSeq transcript XM_001950208 PREDICTED: Acyrthosiphon pisum similar to bromodomain and WD repeat domain containing 2 (LOC100165861), mRNA	1.73853	0.00224527	ACYPI006780
ACYPI009061-RA RefSeq transcript XM_001947892 PREDICTED: Acyrthosiphon pisum similar to epidermal growth factor receptor (LOC100168353), mRNA	1.73331	0.0116394	ACYPI009061
ACYPI006772-RA RefSeq transcript XM_001947370 PREDICTED: Acyrthosiphon pisum similar to mediator complex, 95kD-subunit, putative (LOC100165850), mRNA	1.72916	0.00301942	ACYPI006772	uncharacterized protein
ACYPI001503-RA RefSeq transcript XM_001946958 PREDICTED: Acyrthosiphon pisum similar to acylpeptide hydrolase (LOC100160188), mRNA	1.72665	0.00781166
ACYPI26754-RA Glean transcript GLEAN_06754	1.72271	0.0112526	ACYPI26754
ACYPI009320-RA RefSeq transcript XM_001948665 PREDICTED: Acyrthosiphon pisum similar to leucine-rich transmembrane protein (LOC100168639), mRNA	1.72136	0.0412824	ACYPI009320
ACYPI009025-RA RefSeq transcript XM_001948683 PREDICTED: Acyrthosiphon pisum similar to lethal (2) giant larvae CG2671-PA (LOC100168313), mRNA	1.69341	0.0471831
ACYPI42610-RA Glean transcript GLEAN_22610	1.68822	0.00343803
ACYPI003202-RA RefSeq transcript XM_001942693 PREDICTED: Acyrthosiphon pisum similar to CG10999 CG10999-PA (LOC100162021), mRNA	1.67901	0.00927662	ACYPI003202	AT06280p
ACYPI001730-RA RefSeq transcript XM_001944785 PREDICTED: Acyrthosiphon pisum similar to AGAP006270-PA, transcript variant 1 (LOC100160433), mRNA	1.67778	0.0238677
ACYPI46810-RA Glean transcript GLEAN_26810	1.66161	0.0238677
ACYPI008376-RA RefSeq transcript XM_001944771 PREDICTED: Acyrthosiphon pisum similar to LOC398372 protein (LOC100167591), mRNA	1.64035	0.0284201	ACYPI008376
ACYPI006654-RA RefSeq transcript XM_001949853 PREDICTED: Acyrthosiphon pisum similar to AGAP004915-PA (LOC100165725), partial mRNA	1.61989	0.0466541	ACYPI006654	lachesin precursor
ACYPI000317-RA RefSeq transcript XM_001945725 PREDICTED: Acyrthosiphon pisum similar to zinc finger protein (LOC100158897), mRNA	1.61674	0.030706	ACYPI000317	DNZDHHC/NEW1 zinc finger protein 11
ACYPI40080-RA Glean transcript GLEAN_20080	1.61186	0.00202537	ACYPI40080	protein Phum_PHUM454910
ACYPI001890-RA RefSeq transcript XM_001952744 PREDICTED: Acyrthosiphon pisum similar to adenine phosphoribosyltransferase (LOC100160604), partial mRNA	1.58599	0.018354
ACYPI006748-RA RefSeq transcript XM_001949789 PREDICTED: Acyrthosiphon pisum similar to orb2 CG5735-PB (LOC100165826), mRNA	1.55355	0.00224527	ACYPI006748
ACYPI009428-RA RefSeq transcript XM_001951975 PREDICTED: Acyrthosiphon pisum similar to ras-related protein 2 (LOC100168751), mRNA	1.54814	0.0063049	ACYPI009428
ACYPI009079-RA RefSeq transcript XM_001946067 PREDICTED: Acyrthosiphon pisum similar to cleavage stimulation factor 64-kDa subunit (LOC100168372), mRNA	1.54809	0.0299899	ACYPI009079	Cleavage stimulation factor subunit 2
ACYPI008831-RA RefSeq transcript XM_001946480 PREDICTED: Acyrthosiphon pisum similar to sodium-dependent phosphate transporter (LOC100168101), mRNA	1.54224	0.00258588	ACYPI008831	sodium-dependent phosphate transporter
ACYPI39145-RA Glean transcript GLEAN_19145	1.51918	0.0260273	ACYPI39145
ACYPI000361-RA RefSeq transcript XM_001949393 PREDICTED: Acyrthosiphon pisum similar to d-lactate dehydrognease 2, putative (LOC100158944), mRNA	1.5185	0.0063049	ACYPI000361
ACYPI008658-RA RefSeq transcript XM_001952603 PREDICTED: Acyrthosiphon pisum similar to LOC779531 protein (LOC100167907), mRNA	1.50848	0.0437893	ACYPI008658	uncharacterized protein
ACYPI000749-RA RefSeq transcript XM_001947922 PREDICTED: Acyrthosiphon pisum similar to glass bottom boat protein (LOC100159372), mRNA	1.49714	0.0412873	ACYPI000749	Glass bottom boat
ACYPI000724-RA RefSeq transcript XM_001947275 PREDICTED: Acyrthosiphon pisum similar to AGAP002289-PA (LOC100159344), partial mRNA	1.49646	0.0286515	ACYPI000724	uncharacterized protein
ACYPI000737-RA RefSeq transcript XM_001943868 PREDICTED: Acyrthosiphon pisum similar to aldo-keto reductase (LOC100159357), mRNA	1.49578	0.0151227	ACYPI000737	aldo-keto reductase
ACYPI008887-RA RefSeq transcript XM_001945925 PREDICTED: Acyrthosiphon pisum similar to protein tyrosine kinase (LOC100168161), mRNA	1.49556	0.0412824	ACYPI008887	tyrosine-protein kinase shark
ACYPI009317-RA RefSeq transcript XM_001945205 PREDICTED: Acyrthosiphon pisum similar to terribly reduced optic lobes CG33950-PA (LOC100168636), mRNA	1.45156	0.0176088	ACYPI009317	Basement membrane-specific heparan sulfate proteoglycan core protein
ACYPI51529-RA Glean transcript GLEAN_31529	1.44835	0.0292756	ACYPI002209
ACYPI008136-RA RefSeq transcript XM_001950582 PREDICTED: Acyrthosiphon pisum hypothetical protein LOC100167332 (LOC100167332), mRNA	1.41554	0.0376352
ACYPI004954-RA RefSeq transcript XM_001944081 PREDICTED: Acyrthosiphon pisum similar to MGC79091 protein (LOC100163902), mRNA	1.40346	0.0033057	ACYPI004954
ACYPI34098-RA Glean transcript GLEAN_14098	1.39083	0.00531678
ACYPI010030-RA RefSeq transcript XM_001950701 PREDICTED: Acyrthosiphon pisum similar to AGAP005341-PA (LOC100169408), mRNA	1.38787	0.0144967	ACYPI010030
ACYPI004772-RA RefSeq transcript XM_001948799 PREDICTED: Acyrthosiphon pisum similar to ribosomal protein S6 kinase, 90kDa, polypeptide 2 (LOC100163709), mRNA	1.37885	0.0257456	ACYPI004772	Ribosomal protein S6 kinase alpha-6
ACYPI000320-RA RefSeq transcript XM_001949039 PREDICTED: Acyrthosiphon pisum similar to CG1021-PA (LOC100158900), mRNA	1.37613	0.00681968	ACYPI000320
ACYPI23032-RA Glean transcript GLEAN_03032	1.37032	0.010861
ACYPI009082-RA RefSeq transcript XM_001944818 PREDICTED: Acyrthosiphon pisum similar to CG7597 CG7597-PA (LOC100168376), mRNA	1.36318	0.0424687	ACYPI009082	Cell division cycle 2-like protein kinase 5
ACYPI005107-RA RefSeq transcript XM_001948880 PREDICTED: Acyrthosiphon pisum similar to Adenylate cyclase type 2 (Adenylate cyclase type II) (ATP pyrophosphate-lyase 2) (Adenylyl cyclase 2) (LOC100164066), partial mRNA	1.35567	0.00927662	ACYPI005107
ACYPI009247-RA RefSeq transcript XM_001945357 PREDICTED: Acyrthosiphon pisum similar to homocysteine S-methyltransferase (LOC100168557), mRNA	1.35431	0.00868225	ACYPI009247
ACYPI22381-RA Glean transcript GLEAN_02381	1.32753	0.00128339
ACYPI002690-RA RefSeq transcript XM_001945471 PREDICTED: Acyrthosiphon pisum similar to RhoGEF2 CG9635-PE (LOC100161470), mRNA	1.32565	0.0300671	ACYPI002690
ACYPI002377-RA RefSeq transcript XM_001947297 PREDICTED: Acyrthosiphon pisum similar to CG13663 CG13663-PA (LOC100161128), mRNA	1.32173	0.0151227	ACYPI002377
ACYPI009887-RA RefSeq transcript XM_001945790 PREDICTED: Acyrthosiphon pisum similar to CG10492 CG10492-PB (LOC100169251), mRNA	1.29256	0.0462112	ACYPI009887	uncharacterized protein
ACYPI51911-RA Glean transcript GLEAN_31911	1.29076	0.0315607	ACYPI51911
ACYPI000345-RA RefSeq transcript XM_001951412 PREDICTED: Acyrthosiphon pisum similar to Putative odorant-binding protein A10 precursor (Antennal protein 10) (OS-D protein) (LOC100158928), mRNA	1.26714	0.00119854	ACYPI000345	ACYPI000345 protein
ACYPI22455-RA Glean transcript GLEAN_02455	1.26416	0.018354
ACYPI003210-RA RefSeq transcript XM_001952200 PREDICTED: Acyrthosiphon pisum similar to AGAP006142-PA (LOC100162029), mRNA	1.2609	0.0144967	ACYPI003210
ACYPI008573-RA RefSeq transcript XM_001949342 PREDICTED: Acyrthosiphon pisum similar to activin receptor type I (LOC100167815), mRNA	1.24167	0.0370056	ACYPI008573	Bone morphogenetic protein receptor type-1A
ACYPI006094-RA RefSeq transcript XM_001948557 PREDICTED: Acyrthosiphon pisum similar to AGAP003892-PA (LOC100165130), mRNA	1.2381	0.00301942	ACYPI006094	Equilibrative nucleoside transporter 2
ACYPI006656-RA RefSeq transcript XM_001943066 PREDICTED: Acyrthosiphon pisum similar to predicted protein (LOC100165727), mRNA	1.23239	0.0471831	ACYPI006656
ACYPI008513-RA RefSeq transcript XM_001948997 PREDICTED: Acyrthosiphon pisum similar to CG6000 CG6000-PA (LOC100167746), mRNA	1.2231	0.0222546	ACYPI008513
ACYPI001730-RB RefSeq transcript XM_001944889 PREDICTED: Acyrthosiphon pisum similar to AGAP006270-PA, transcript variant 2 (LOC100160433), mRNA	1.21978	0.0235057
ACYPI002296-RA RefSeq transcript XM_001948968 PREDICTED: Acyrthosiphon pisum similar to glucosidase ii beta subunit (LOC100161041), mRNA	1.18936	0.0118784	ACYPI002296	glucosidase 2 subunit beta precursor
ACYPI008773-RA RefSeq transcript XM_001951983 PREDICTED: Acyrthosiphon pisum similar to cdc73 domain protein (LOC100168037), partial mRNA	1.1498	0.0245809	ACYPI002484	Parafibromin
ACYPI007447-RA RefSeq transcript XM_001952301 PREDICTED: Acyrthosiphon pisum hypothetical protein LOC100166588 (LOC100166588), mRNA	1.12757	0.0033057	ACYPI007447	sjchgc05576 protein
ACYPI007194-RA RefSeq transcript XM_001942922 PREDICTED: Acyrthosiphon pisum similar to DNA-directed RNA polymerase I largest subunit (LOC100166311), mRNA	1.10253	0.0151227	ACYPI007194	DNA-directed RNA polymerase
ACYPI008742-RA RefSeq transcript XM_001951091 PREDICTED: Acyrthosiphon pisum similar to conserved hypothetical protein (LOC100168003), mRNA	1.08007	0.0238677	ACYPI008742	Thioredoxin
ACYPI003219-RA RefSeq transcript XM_001952459 PREDICTED: Acyrthosiphon pisum similar to fibroblast growth factor receptor (LOC100162038), mRNA	1.06784	0.0397681
ACYPI005519-RA RefSeq transcript XM_001944125 PREDICTED: Acyrthosiphon pisum similar to amino acid transporter (LOC100164507), mRNA	1.05846	0.0445398	ACYPI005519
ACYPI005118-RA RefSeq transcript XM_001944124 PREDICTED: Acyrthosiphon pisum similar to slimfast CG11128-PC (LOC100164077), mRNA	1.05733	0.0458295	ACYPI005118
ACYPI000092-RA RefSeq transcript NM_001126176 gi|187123197|ref|NM_001126176.1 Acyrthosiphon pisum amino acid transporter (Sdi-1), mRNA	1.05269	0.0238677	ACYPI000092	Proton-coupled amino acid transporter 1
ACYPI006647-RA RefSeq transcript XM_001948164 PREDICTED: Acyrthosiphon pisum similar to Na+/H+ exchanger domain containing 2 (LOC100165718), mRNA	1.02072	0.0163216	ACYPI006647	Mitochondrial sodium/hydrogen exchanger NHA2
ACYPI002470-RA RefSeq transcript XM_001952071 PREDICTED: Acyrthosiphon pisum similar to Extracellular regulated MAP kinase (LOC100161230), mRNA	1.00562	0.0257456	ACYPI002470	Mitogen-activated protein kinase 3
ACYPI008732-RA RefSeq transcript XM_001948152 PREDICTED: Acyrthosiphon pisum similar to cation efflux protein/ zinc transporter (LOC100167991), mRNA	1.00178	0.0245809	ACYPI008732
ACYPI010091-RA RefSeq transcript XM_001945889 PREDICTED: Acyrthosiphon pisum similar to CTP synthase (LOC100169476), mRNA	0.985064	0.0376352	ACYPI010091	CTP synthase 1
ACYPI004307-RA RefSeq transcript XM_001951746 PREDICTED: Acyrthosiphon pisum similar to vesicle protein sorting-associated (LOC100163207), mRNA	0.981916	0.0309267	ACYPI004307
ACYPI50169-RA Glean transcript GLEAN_30169	0.975423	0.0470689
ACYPI006509-RA RefSeq transcript XM_001946664 PREDICTED: Acyrthosiphon pisum similar to nmda receptor glutamate-binding chain (LOC100165572), mRNA	0.966461	0.00927662	ACYPI006509	GJ21985
ACYPI001059-RA RefSeq transcript XM_001952712 PREDICTED: Acyrthosiphon pisum similar to ubiquitin ligase E3 alpha (LOC100159709), mRNA	0.95446	0.0148159	ACYPI001059	ubiquitin-protein ligase e3 component n-recognin-2
ACYPI003267-RA RefSeq transcript XM_001945624 PREDICTED: Acyrthosiphon pisum similar to thioredoxin domain containing 11 (LOC100162089), mRNA	0.949665	0.0402783	ACYPI003267	uncharacterized protein
ACYPI009470-RA RefSeq transcript XM_001951358 PREDICTED: Acyrthosiphon pisum similar to RNA-binding protein 9 CG3151-PB (LOC100168796), mRNA	0.940673	0.0376352	ACYPI009470	ELAV-like protein 4
ACYPI009276-RA RefSeq transcript XM_001944333 PREDICTED: Acyrthosiphon pisum similar to huntingtin interacting protein 14 (LOC100168591), mRNA	0.841979	0.0393906	ACYPI009276	Huntingtin-interacting protein 14
ACYPI008912-RA RefSeq transcript XM_001948613 PREDICTED: Acyrthosiphon pisum similar to d-amino acid oxidase (LOC100168186), mRNA	0.82229	0.0238677	ACYPI008912	D-amino acid oxidase
ACYPI001011-RA RefSeq transcript XM_001949099 PREDICTED: Acyrthosiphon pisum similar to CG11190 CG11190-PA (LOC100159658), mRNA	0.81995	0.0348455	ACYPI001011	gpi transamidase component pig-t precursor
ACYPI009194-RA RefSeq transcript XM_001952163 PREDICTED: Acyrthosiphon pisum similar to aquaporin (LOC100168499), mRNA	0.803392	0.0437893	ACYPI009194
ACYPI007104-RA RefSeq transcript XM_001951155 PREDICTED: Acyrthosiphon pisum similar to tricarboxylate transport protein, mitochondrial (LOC100166212), mRNA	0.797322	0.0242365	ACYPI007104	tricarboxylate transport protein
ACYPI54995-RA Glean transcript GLEAN_34995	0.793824	0.0405987
ACYPI006039-RA RefSeq transcript XM_001950063 PREDICTED: Acyrthosiphon pisum similar to solute carrier family 37 (glycerol-3-phosphate transporter), member 2 (LOC100165070), mRNA	0.638841	0.0355231	ACYPI006039
D7 YFØ vs AP3
ACYPI V1	log2FC	Adjusted P-value	ACYPI V2.1c	Product
ACYPI007467-RA RefSeq transcript XM_001945930 PREDICTED: Acyrthosiphon pisum similar to sucrase (LOC100166609), partial mRNA	-4.35486	0.0298969	ACYPI007467	Maltase 1
ACYPI001436-RA RefSeq transcript XM_001952128 PREDICTED: Acyrthosiphon pisum similar to sucrase (LOC100160111), mRNA	-4.14946	0.0407252	ACYPI007467	Maltase 1
ACYPI31408-RA Glean transcript GLEAN_11408	-3.95379	0.0209278	ACYPI31408	AGAP007028-PA
ACYPI008128-RA RefSeq transcript XM_001952469 PREDICTED: Acyrthosiphon pisum similar to conserved hypothetical protein (LOC100167324), mRNA	-3.86602	0.0364525	ACYPI008128	uncharacterized protein
ACYPI38102-RA Glean transcript GLEAN_18102	-3.52475	0.00635188
ACYPI009653-RA RefSeq transcript XM_001947630 PREDICTED: Acyrthosiphon pisum similar to predicted protein (LOC100168995), mRNA	-2.97341	0.0154877	ACYPI009653
ACYPI000639-RA RefSeq transcript XM_001948658 PREDICTED: Acyrthosiphon pisum similar to cytochrome P450 CYP6AX1 protein (LOC100159248), mRNA	-2.9509	0.0268827
ACYPI24488-RA Glean transcript GLEAN_04488	-2.92799	0.00751554	ACYPI24488	uncharacterized protein
ACYPI001281-RA RefSeq transcript XM_001943617 PREDICTED: Acyrthosiphon pisum similar to cathepsin B (LOC100159943), mRNA	-2.84339	0.00305996	ACYPI001281	Cathepsin B
ACYPI002507-RA RefSeq transcript XM_001943147 PREDICTED: Acyrthosiphon pisum similar to CG1443 CG1443-PA (LOC100161273), partial mRNA	-2.8083	0.0213733
ACYPI003561-RB RefSeq transcript XM_001949714 PREDICTED: Acyrthosiphon pisum hypothetical protein LOC100162409, transcript variant 2 (LOC100162409), mRNA	-2.67669	0.0388335	ACYPI003561
ACYPI48724-RA Glean transcript GLEAN_28724	-2.61764	0.0285971
ACYPI001283-RA RefSeq transcript XM_001947191 PREDICTED: Acyrthosiphon pisum similar to GA19067-PA (LOC100159945), mRNA	-2.53971	0.0426068	ACYPI40747	GA19067-PA
ACYPI007867-RA RefSeq transcript XM_001952441 PREDICTED: Acyrthosiphon pisum similar to calmodulin-binding protein trpl (LOC100167043), partial mRNA	-2.53665	0.016197	ACYPI008192	Transient-receptor-potential-like protein
ACYPI004952-RA RefSeq transcript XM_001945798 PREDICTED: Acyrthosiphon pisum similar to cytochrome P450 (LOC100163900), mRNA	-2.50465	0.0285971	ACYPI004952
ACYPI45775-RA Glean transcript GLEAN_25775	-2.46318	0.0268827
ACYPI003338-RA RefSeq transcript XM_001943906 PREDICTED: Acyrthosiphon pisum similar to Legumain precursor (Asparaginyl endopeptidase) (Protease, cysteine 1) (LOC100162169), mRNA	-2.43534	0.0426068	ACYPI003338	uncharacterized protein
ACYPI002751-RA RefSeq transcript XM_001943246 PREDICTED: Acyrthosiphon pisum similar to leucine-rich transmembrane protein (LOC100161535), mRNA	-2.41113	0.0298969	ACYPI002751	leucine-rich transmembrane protein
ACYPI001103-RA RefSeq transcript XM_001946919 PREDICTED: Acyrthosiphon pisum similar to putative tachykinin receptor 1 (AGAP002824-PA) (LOC100159754), mRNA	-2.40266	0.04891	ACYPI001103
ACYPI006655-RA RefSeq transcript XM_001948315 PREDICTED: Acyrthosiphon pisum similar to membrane alanyl aminopeptidase N (LOC100165726), mRNA	-2.38917	0.042756	ACYPI006655	Aminopeptidase N-like protein
ACYPI45356-RA Glean transcript GLEAN_25356	-2.2964	0.00751554	ACYPI45356
ACYPI008192-RA RefSeq transcript XM_001946228 PREDICTED: Acyrthosiphon pisum similar to calmodulin-binding protein trpl (LOC100167393), partial mRNA	-2.28087	0.00570861	ACYPI008192	Transient-receptor-potential-like protein
ACYPI010204-RA RefSeq transcript XM_001943750 PREDICTED: Acyrthosiphon pisum similar to glucosyl/glucuronosyl transferases (LOC100169601), mRNA	-2.22481	0.0418129	ACYPI010204	glucosyl/glucuronosyl transferases
ACYPI008688-RA RefSeq transcript XM_001950481 PREDICTED: Acyrthosiphon pisum hypothetical protein LOC100167942 (LOC100167942), mRNA	-2.13064	0.00305996	ACYPI008688	uncharacterized protein
ACYPI009842-RA RefSeq transcript XM_001944853 PREDICTED: Acyrthosiphon pisum similar to p260 (LOC100169202), partial mRNA	-2.08404	0.0388335	ACYPI009842
ACYPI39361-RA Glean transcript GLEAN_19361	-2.08069	0.0364525	ACYPI39361	Lysosomal acid phosphatase
ACYPI002881-RA RefSeq transcript XM_001946356 PREDICTED: Acyrthosiphon pisum similar to alpha-galactosidase/alpha-n-acetylgalactosaminidase (LOC100161679), mRNA	-2.00455	0.00305996	ACYPI002881	Alpha-N-acetylgalactosaminidase
ACYPI48561-RA Glean transcript GLEAN_28561	-1.97762	0.0481605	ACYPI48561
ACYPI009833-RA RefSeq transcript XM_001943781 PREDICTED: Acyrthosiphon pisum similar to AGAP009364-PA (LOC100169193), mRNA	-1.89248	0.00751554	ACYPI009833
ACYPI000006-RA RefSeq transcript NM_001126138 gi|187097099|ref|NM_001126138.1 Acyrthosiphon pisum cathepsin B-1852 (Catb-1852), mRNA	-1.88779	0.00699031	ACYPI000006
ACYPI37969-RA Glean transcript GLEAN_17969	-1.88128	0.00751554	ACYPI37969
ACYPI006005-RA RefSeq transcript XM_001942958 PREDICTED: Acyrthosiphon pisum hypothetical protein LOC100165032 (LOC100165032), mRNA	-1.77917	0.00751554	ACYPI006005	uncharacterized protein
ACYPI000270-RA RefSeq transcript XM_001950433 PREDICTED: Acyrthosiphon pisum similar to carboxylesterase; esterase FE4 (LOC100158848), partial mRNA	-1.69074	0.0373306	ACYPI000270	Esterase FE4
ACYPI21464-RA Glean transcript GLEAN_01464	-1.68314	0.0407252	ACYPI21464
ACYPI002402-RA RefSeq transcript XM_001951781 PREDICTED: Acyrthosiphon pisum similar to CG5731 CG5731-PA (LOC100161159), partial mRNA	-1.65089	0.0154877	ACYPI082349
ACYPI009525-RA RefSeq transcript XM_001942520 PREDICTED: Acyrthosiphon pisum similar to glucose dehydrogenase (LOC100168857), mRNA	-1.63986	0.00305996	ACYPI009525
ACYPI007830-RA RefSeq transcript XM_001947537 PREDICTED: Acyrthosiphon pisum similar to CG5065 CG5065-PA (LOC100167005), partial mRNA	-1.63856	0.0298969	ACYPI007830	fatty acyl-coa reductase
ACYPI004802-RA RefSeq transcript XM_001949281 PREDICTED: Acyrthosiphon pisum similar to matrix metalloproteinase (LOC100163741), mRNA	-1.63035	0.00443209
ACYPI34957-RA Glean transcript GLEAN_14957	-1.612	0.0426068	ACYPI34957
ACYPI33359-RA Glean transcript GLEAN_13359	-1.51815	0.031159
ACYPI000332-RA RefSeq transcript XM_001942542 PREDICTED: Acyrthosiphon pisum similar to ring canal kelch protein (LOC100158915), mRNA	-1.46854	0.0204076	ACYPI000332
ACYPI32924-RA Glean transcript GLEAN_12924	-1.45824	0.0443946
ACYPI005721-RA RefSeq transcript XM_001943738 PREDICTED: Acyrthosiphon pisum similar to otopetrin (LOC100164731), mRNA	-1.37826	0.0481605	ACYPI005721	uncharacterized protein
ACYPI007833-RA RefSeq transcript XM_001951686 PREDICTED: Acyrthosiphon pisum hypothetical protein LOC100167008 (LOC100167008), mRNA	-1.32977	0.00305996	ACYPI007833
ACYPI007438-RA RefSeq transcript XM_001946798 PREDICTED: Acyrthosiphon pisum similar to CG12065 CG12065-PD (LOC100166579), mRNA	-1.31162	0.016197	ACYPI007438
ACYPI002700-RA RefSeq transcript XM_001947531 PREDICTED: Acyrthosiphon pisum similar to cullin (LOC100161481), mRNA	-1.311	0.0426068	ACYPI002700
ACYPI005552-RA RefSeq transcript XM_001948331 PREDICTED: Acyrthosiphon pisum similar to Sorting nexin 4 (LOC100164545), mRNA	-1.27473	0.00751554	ACYPI005552	sorting nexin-4
ACYPI004168-RC RefSeq transcript XM_001945894 PREDICTED: Acyrthosiphon pisum similar to serine/threonine-protein kinase 38 (ndr2 protein kinase), transcript variant 3 (LOC100163056), mRNA	-1.23969	0.0407252
ACYPI53276-RA Glean transcript GLEAN_33276	-1.2288	0.0273758	ACYPI53276
ACYPI002017-RA RefSeq transcript XM_001944056 PREDICTED: Acyrthosiphon pisum similar to phosphatidylinositol transfer protein (LOC100160745), mRNA	-1.18618	0.0273758	ACYPI002017
ACYPI004647-RA RefSeq transcript XM_001943079 PREDICTED: Acyrthosiphon pisum similar to CG15528 CG15528-PA (LOC100163569), mRNA	2.68627	0.00305996	ACYPI004647
ACYPI006744-RA RefSeq transcript XM_001952738 PREDICTED: Acyrthosiphon pisum similar to Neprilysin 5 CG6265-PB (LOC100165822), mRNA	2.16202	0.0364525	ACYPI006744	Zinc metalloprotease
ACYPI003723-RA RefSeq transcript XM_001945824 PREDICTED: Acyrthosiphon pisum similar to pH sensitive chloride channel (LOC100162577), partial mRNA	2.08582	0.0142255	ACYPI003723
ACYPI005625-RA RefSeq transcript XM_001951380 PREDICTED: Acyrthosiphon pisum similar to 41 kDa zymogen (LOC100164631), mRNA	2.08266	0.027648	ACYPI005625	Serine protease P142
ACYPI41893-RA Glean transcript GLEAN_21893	1.96321	0.0285971
ACYPI001449-RA RefSeq transcript XM_001945811 PREDICTED: Acyrthosiphon pisum similar to Rgk1 CG9811-PA (LOC100160125), partial mRNA	1.95863	0.0213733	ACYPI001449	GTP-binding protein RAD
ACYPI24696-RA Glean transcript GLEAN_04696	1.92499	0.00305996
ACYPI006800-RA RefSeq transcript XM_001946293 PREDICTED: Acyrthosiphon pisum similar to lim homeobox protein (LOC100165883), mRNA	1.69863	0.00699031	ACYPI006800
ACYPI35780-RA Glean transcript GLEAN_15780	1.6759	0.0426068
ACYPI38614-RA Glean transcript GLEAN_18614	1.59694	0.00751554	ACYPI38614
ACYPI53525-RA Glean transcript GLEAN_33525	1.43913	0.0426068	ACYPI53525
ACYPI23767-RA Glean transcript GLEAN_03767	1.07964	0.0298969	ACYPI44407	Corpora allata cytochrome P450
ACYPI54997-RA Glean transcript GLEAN_34997	1.06564	0.0407252	ACYPI54997
ACYPI46394-RA Glean transcript GLEAN_26394	1.04006	0.0213733	ACYPI46394	uncharacterized protein
